# Supplementary material
Source: publisher figshare collection journal article supplement (https://tandf.figshare.com/ndownloader/files/13050161)
Supplement: Supplementary file 1 [file 13050161]

## Sheet: Eq. 1-3 full growth period
Days in regrowth period	Date of harvest	Location	Ave Soil Moisture Deficit (%)	Days above 95% RH	Month	Days above 90% RH	Days above 85% RH	Days above 80% RH	Days above 70% RH	All Days sum rainfall (mm)	T ave growing period (°C)	Average solar radiation (MJ/M2)	Average daily sunshine hours	Insect damage	Fungal damage	Growth stage at sampling	Height (cm)	Yield (t DM/ha)	Coumestrol (mg kg DM-1)
32	2015-02-09	Ashley Dene	94.6	4	2	6	10	13	26	16.6	17.9	22.4	7.81	1	2	6	9	0.207	14.1507	Predictors in italics omitted due to collinearity with other predictors
32	2015-02-09	Ashley Dene	94.6	4	2	6	10	13	26	16.6	17.9	22.4	7.81	1	3	6	5	0.2655	26.991
32	2015-02-09	Ashley Dene	94.6	4	2	6	10	13	26	16.6	17.9	22.4	7.81	1	3	6	7	0.25	29.013
32	2015-02-09	Ashley Dene	94.6	4	2	6	10	13	26	16.6	17.9	22.4	7.81	1	2	6	7	0.2125	18.3078
32	2015-02-09	Ashley Dene	94.6	4	2	6	10	13	26	16.6	17.9	22.4	7.81	1	2	6	13	0.695	14.5047
32	2015-02-09	Ashley Dene	94.6	4	2	6	10	13	26	16.6	17.9	22.4	7.81	1	1	6	10	0.276	7.26323
32	2015-02-09	Ashley Dene	94.6	4	2	6	10	13	26	16.6	17.9	22.4	7.81	1	1	6	10	0.198	7.72738
32	2015-02-09	Ashley Dene	94.6	4	2	6	10	13	26	16.6	17.9	22.4	7.81	1	1	6	5	0.304	7.41918
32	2015-02-09	Ashley Dene	94.6	4	2	6	10	13	26	16.6	17.9	22.4	7.81	1	1	6	10	0.251	10.4826
32	2015-02-09	Ashley Dene	94.6	4	2	6	10	13	26	16.6	17.9	22.4	7.81	1	1	6	7	0.239	23.0137
56	2015-03-05	Ashley Dene	93.5	8	3	16	24	31	49	27.8	17.6	21.2	7.78	1	2	8	8	0.2545	16.6699
56	2015-03-05	Ashley Dene	93.5	8	3	16	24	31	49	27.8	17.6	21.2	7.78	1	2	8	7	0.278	28.3978
56	2015-03-05	Ashley Dene	93.5	8	3	16	24	31	49	27.8	17.6	21.2	7.78	1	1	8	5	0.278	29.3899
56	2015-03-05	Ashley Dene	93.5	8	3	16	24	31	49	27.8	17.6	21.2	7.78	1	2	8	7	0.2395	31.3703
56	2015-03-05	Ashley Dene	93.5	8	3	16	24	31	49	27.8	17.6	21.2	7.78	2	2	8	14	0.328	22.1065
56	2015-03-05	Ashley Dene	93.5	8	3	16	24	31	49	27.8	17.6	21.2	7.78	1	2	8	13	0.433	12.114
56	2015-03-05	Ashley Dene	93.5	8	3	16	24	31	49	27.8	17.6	21.2	7.78	1	1	8	5	0.2775	27.3372
56	2015-03-05	Ashley Dene	93.5	8	3	16	24	31	49	27.8	17.6	21.2	7.78	1	1	8	8	0.3155	12.6286
56	2015-03-05	Ashley Dene	93.5	8	3	16	24	31	49	27.8	17.6	21.2	7.78	1	2	8	20	0.685	13.8911
56	2015-03-05	Ashley Dene	93.5	8	3	16	24	31	49	27.8	17.6	21.2	7.78	1	1	8	10	0.369	11.5809
31	2015-05-02	Ashley Dene	60.3	6	5	10	16	20	23	77.6	13.4	7.95	4.19	2	3	1	16	0.6765	44.8985
31	2015-05-02	Ashley Dene	60.3	6	5	10	16	20	23	77.6	13.4	7.95	4.19	3	3	1	10	0.4525	40.0235
31	2015-05-02	Ashley Dene	60.3	6	5	10	16	20	23	77.6	13.4	7.95	4.19	3	3	1	8	0.5615	31.9448
31	2015-05-02	Ashley Dene	60.3	6	5	10	16	20	23	77.6	13.4	7.95	4.19	3	3	2	17	0.754	43.4019
31	2015-05-02	Ashley Dene	60.3	6	5	10	16	20	23	77.6	13.4	7.95	4.19	2	3	2	22	0.6165	78.5461
31	2015-05-02	Ashley Dene	60.3	6	5	10	16	20	23	77.6	13.4	7.95	4.19	3	4	2	16	0.6955	34.9869
31	2015-05-02	Ashley Dene	60.3	6	5	10	16	20	23	77.6	13.4	7.95	4.19	3	3	1	11	0.509	47.3307
31	2015-05-02	Ashley Dene	60.3	6	5	10	16	20	23	77.6	13.4	7.95	4.19	3	4	1	11	0.6045	48.2553
31	2015-05-02	Ashley Dene	60.3	6	5	10	16	20	23	77.6	13.4	7.95	4.19	3	3	2	22	1.069	24.8855
31	2015-05-02	Ashley Dene	60.3	6	5	10	16	20	23	77.6	13.4	7.95	4.19	4	4	2	22	0.976	36.6037
31	2015-05-02	Ashley Dene	60.3	6	5	10	16	20	23	77.6	13.4	7.95	4.19	2	2	2	22	0.727	46.457
31	2015-05-02	Ashley Dene	60.3	6	5	10	16	20	23	77.6	13.4	7.95	4.19	3	3	1	12	0.62	37.7063
31	2015-05-02	Ashley Dene	60.3	6	5	10	16	20	23	77.6	13.4	7.95	4.19	3	3	1	10	0.929	45.847
31	2015-05-02	Ashley Dene	60.3	6	5	10	16	20	23	77.6	13.4	7.95	4.19	3	4	2	22	0.365	52.8935
31	2015-05-02	Ashley Dene	60.3	6	5	10	16	20	23	77.6	13.4	7.95	4.19	2	3	2	21	0.92	26.1502
46	2015-05-17	Ashley Dene	46.6	10	5	16	23	28	34	81.8	13.2	7.04	4.36	3	4	1	11	0.5095	49.0663
46	2015-05-17	Ashley Dene	46.6	10	5	16	23	28	34	81.8	13.2	7.04	4.36	2	3	1	13	0.6695	49.5283
46	2015-05-17	Ashley Dene	46.6	10	5	16	23	28	34	81.8	13.2	7.04	4.36	3	3	1	9	0.759	55.5471
46	2015-05-17	Ashley Dene	46.6	10	5	16	23	28	34	81.8	13.2	7.04	4.36	3	4	1	7	0.536	39.52
46	2015-05-17	Ashley Dene	46.6	10	5	16	23	28	34	81.8	13.2	7.04	4.36	3	4	2	18	0.6615	59.4583
46	2015-05-17	Ashley Dene	46.6	10	5	16	23	28	34	81.8	13.2	7.04	4.36	2	3	2	31	1.65	29.7627
46	2015-05-17	Ashley Dene	46.6	10	5	16	23	28	34	81.8	13.2	7.04	4.36	3	4	2	19	0.9275	43.8113
46	2015-05-17	Ashley Dene	46.6	10	5	16	23	28	34	81.8	13.2	7.04	4.36	3	4	1	15	0.954	55.9807
46	2015-05-17	Ashley Dene	46.6	10	5	16	23	28	34	81.8	13.2	7.04	4.36	3	4	2	18	0.751	50.32
46	2015-05-17	Ashley Dene	46.6	10	5	16	23	28	34	81.8	13.2	7.04	4.36	3	3	2	20	1.0925	71.6318
46	2015-05-17	Ashley Dene	46.6	10	5	16	23	28	34	81.8	13.2	7.04	4.36	3	4	2	21	0.5945	66.8943
46	2015-05-17	Ashley Dene	46.6	10	5	16	23	28	34	81.8	13.2	7.04	4.36	3	4	1	12	0.6265	66.3558
46	2015-05-17	Ashley Dene	46.6	10	5	16	23	28	34	81.8	13.2	7.04	4.36	3	3	1	7	0.5355	71.0239
46	2015-05-17	Ashley Dene	46.6	10	5	16	23	28	34	81.8	13.2	7.04	4.36	3	4	2	20	1.1065	65.5313
46	2015-05-17	Ashley Dene	46.6	10	5	16	23	28	34	81.8	13.2	7.04	4.36	2	3	2	17	1.0275	69.2196
36	2014-12-16	Lincoln, 2014	66.8	1	12	3	8	11	22	57.2	13.9	23.58	7.75	1	2	3.4	40	1.494	5.17958
19	2014-12-16	Lincoln, 2014	69.1	1	12	3	7	9	15	41.4	13.1	23.48	7.61	1	1	1	15	0.399	6.6415
83	2014-12-16	Lincoln, 2014	50	3	12	9	17	27	53	84.4	12.6	21.27	7.66	1	2	5.7	62	3.7435	15.8321
36	2014-12-16	Lincoln, 2014	66.8	1	12	3	8	11	22	57.2	13.9	23.58	7.75	2	1	3.4	42	1.5495	6.7288
19	2014-12-16	Lincoln, 2014	69.1	1	12	3	7	9	15	41.4	13.1	23.48	7.61	2	1	1	18	0.5935	10.6223
83	2014-12-16	Lincoln, 2014	50	3	12	9	17	27	53	84.4	12.6	21.27	7.66				70	4.1425	11.9202
36	2014-12-16	Lincoln, 2014	66.8	1	12	3	8	11	22	57.2	13.9	23.58	7.75	2	2	3.2	47	2.5335	5.88157
19	2014-12-16	Lincoln, 2014	69.1	1	12	3	7	9	15	41.4	13.1	23.48	7.61	1	1	1.2	20	0.69	8.101
83	2014-12-16	Lincoln, 2014	50	3	12	9	17	27	53	84.4	12.6	21.27	7.66			5.6	62	3.54	13.2605
29	2015-01-14	Lincoln, 2015	80.9	2	1	3	8	14	24	7.2	17.8	24.6	7.63	1	2	4.4	35	1.5235	5.07371
29	2015-01-14	Lincoln, 2015	80.9	2	1	3	8	14	24	7.2	17.8	24.6	7.63	2	1	4.2	38	1.339	1.82994
48	2015-01-14	Lincoln, 2015	76.2778	3	1	6	15	23	39	48.6	16	24.15	7.62	1	2	5.4	61	2.5705	3.32469
29	2015-01-14	Lincoln, 2015	80.9	2	1	3	8	14	24	7.2	17.8	24.6	7.63	1	1	5.8	42	1.9395	2.9966
29	2015-01-14	Lincoln, 2015	80.9	2	1	3	8	14	24	7.2	17.8	24.6	7.63	1	2	4.4	33	1.4695	6.36095
29	2015-01-14	Lincoln, 2015	80.9	2	1	3	8	14	24	7.2	17.8	24.6	7.63	1	1	4.8	40	1.1465	2.00904
48	2015-01-14	Lincoln, 2015	76.2778	3	1	6	15	23	39	48.6	16	24.15	7.62	1	2	5.7	62	3.532	3.12358
29	2015-01-14	Lincoln, 2015	80.9	2	1	3	8	14	24	7.2	17.8	24.6	7.63	1	2	4.7	50	2.045	2.2365
29	2015-01-14	Lincoln, 2015	80.9	2	1	3	8	14	24	7.2	17.8	24.6	7.63	1	3	4.2	34	1.149	4.53357
29	2015-01-14	Lincoln, 2015	80.9	2	1	3	8	14	24	7.2	17.8	24.6	7.63	2	1	3.5	42	1.0275	2.20814
48	2015-01-14	Lincoln, 2015	76.2778	3	1	6	15	23	39	48.6	16	24.15	7.62	1	2	4.6	60	2.9225	4.14776
29	2015-01-14	Lincoln, 2015	80.9	2	1	3	8	14	24	7.2	17.8	24.6	7.63	1	1	5	48	1.594	3.12171
43	2015-01-28	Lincoln, 2015	83.8	4	1	5	12	19	36	10.2	17.9	21.26	6.21	2	2	6.2	43	1.646	2.1987
43	2015-01-28	Lincoln, 2015	83.8	4	1	5	12	19	36	10.2	17.9	21.26	6.21	1	2	7.3	48	2.0635	3.34379
43	2015-01-28	Lincoln, 2015	83.8	4	1	5	12	19	36	10.2	17.9	21.26	6.21	2	3	7	57	2.942	2.12965
43	2015-01-28	Lincoln, 2015	83.8	4	1	5	12	19	36	10.2	17.9	21.26	6.21	1	2	6.4	63	2.342	4.82164
43	2015-01-28	Lincoln, 2015	83.8	4	1	5	12	19	36	10.2	17.9	21.26	6.21	1	3	7	55	2.5325	4.247
28	2015-02-11	Lincoln, 2015	90	3	2	5	10	12	21	16.2	18	17.84	5.33	1	2	4.2	38	1.67	3.64715
28	2015-02-11	Lincoln, 2015	90	3	2	5	10	12	21	16.2	18	17.84	5.33	1	1	4.2	21	0.9175	0.959817
57	2015-02-11	Lincoln, 2015	85.3	5	2	8	18	26	45	23.4	17.9	21.28	6.5	1	3	8.7	70	4.2745	1.88775
28	2015-02-11	Lincoln, 2015	90	3	2	5	10	12	21	16.2	18	17.84	5.33	1	2	3.8	25	0.994	4.27451
28	2015-02-11	Lincoln, 2015	90	3	2	5	10	12	21	16.2	18	17.84	5.33	1	2	3.7	28	1.099	4.2687
57	2015-02-11	Lincoln, 2015	85.3	5	2	8	18	26	45	23.4	17.9	21.28	6.5	1	3	8.4	62	4.3345	1.73553
28	2015-02-11	Lincoln, 2015	90	3	2	5	10	12	21	16.2	18	17.84	5.33	1	2	3	18	0.5145	8.64021
28	2015-02-11	Lincoln, 2015	90	3	2	5	10	12	21	16.2	18	17.84	5.33	1	2	4.8	40	1.505	3.3882
57	2015-02-11	Lincoln, 2015	85.3	5	2	8	18	26	45	23.4	17.9	21.28	6.5	1	3	8.4	60	3.5205	5.57927
28	2015-02-25	Lincoln, 2015	91.1	4	2	9	15	19	23	21.6	17.2	21.34	8.01	2	3	3.9	33	1.2775	5.66961
42	2015-02-25	Lincoln, 2015	90.4	6	2	11	19	24	35	24.6	17.4	19.02	6.43	2	3	7.5	45	2.0605	13.6087
71	2015-02-25	Lincoln, 2015	86.5	8	2	14	27	38	59	31.8	17.6	21.29	6.92	2	3	8.8	70	4.0515	7.21801
28	2015-02-25	Lincoln, 2015	91.1	4	2	9	15	19	23	21.6	17.2	21.34	8.01	1	3	3.4	35	1.497	12.9185
42	2015-02-25	Lincoln, 2015	90.4	6	2	11	19	24	35	24.6	17.4	19.02	6.43	1	2	6.6	44	1.8995	16.6691
71	2015-02-25	Lincoln, 2015	86.5	8	2	14	27	38	59	31.8	17.6	21.29	6.92			8.95	70	4.6995	18.2436
28	2015-02-25	Lincoln, 2015	91.1	4	2	9	15	19	23	21.6	17.2	21.34	8.01	2	2	2.8	32	1.131	11.5558
42	2015-02-25	Lincoln, 2015	90.4	6	2	11	19	24	35	24.6	17.4	19.02	6.43	1	3	7.4	48	2.021	22.6924
71	2015-02-25	Lincoln, 2015	86.5	8	2	14	27	38	59	31.8	17.6	21.29	6.92	2		8.4	65	4.372	12.8127
28	2015-03-11	Lincoln, 2015	91	5	3	14	17	21	27	28	17.1	19.19	7.35	2	3	2.2	27	0.9645	9.99395
42	2015-03-11	Lincoln, 2015	91	6	3	17	23	28	36	41.2	17.4	19.9	7.56	2	3	4.5	38	1.054	13.2848
55	2015-03-11	Lincoln, 2015	90.5	7	3	18	26	32	47	44.2	17.5	18.33	6.25	1	4	8.1	50	1.844	26.1713
85	2015-03-11	Lincoln, 2015	87.2	10	3	22	35	47	72	51.4	17.6	20.59	6.78	1	4	9.4	67	2.289	39.4236
28	2015-03-11	Lincoln, 2015	91	5	3	14	17	21	27	28	17.1	19.19	7.35	2	3	1.9	25	0.8565	13.0718
42	2015-03-11	Lincoln, 2015	91	6	3	17	23	28	36	41.2	17.4	19.9	7.56	1	3	6	37	1.635	31.0372
55	2015-03-11	Lincoln, 2015	90.5	7	3	18	26	32	47	44.2	17.5	18.33	6.25	1	4	8.4	53	1.8775	50.9109
85	2015-03-11	Lincoln, 2015	87.2	10	3	22	35	47	72	51.4	17.6	20.59	6.78	1	4	9.5	80	4.251	37.6806
28	2015-03-11	Lincoln, 2015	91	5	3	14	17	21	27	28	17.1	19.19	7.35	2	3	1.5	23	0.5485	15.5832
42	2015-03-11	Lincoln, 2015	91	6	3	17	23	28	36	41.2	17.4	19.9	7.56	1	4	5.9	46	1.435	30.5375
55	2015-03-11	Lincoln, 2015	90.5	7	3	18	26	32	47	44.2	17.5	18.33	6.25	1	4	8.5	56	3.094	31.1154
85	2015-03-11	Lincoln, 2015	87.2	10	3	22	35	47	72	51.4	17.6	20.59	6.78	1	4	9.8	69	2.9895	38.8489
42	2015-03-25	Lincoln, 2015	89.6	8	3	18	26	33	41	47.8	16.2	17.5	6.81	2	3	3.1	28	1.287	37.1889
56	2015-03-25	Lincoln, 2015	89.9	9	3	21	32	40	50	61	16.6	18.45	6.96	2	4	6.5	52	1.5285	50.106
69	2015-03-25	Lincoln, 2015	89.8	10	3	22	35	44	61	64	16.9	17.48	6.15	2	4	7.7	54	1.791	116.542
99	2015-03-25	Lincoln, 2015	87.1	13	3	26	44	59	86	71.2	17.2	19.67	6.63	2	5	10	60	3.282	52.3516
42	2015-03-25	Lincoln, 2015	89.6	8	3	18	26	33	41	47.8	16.2	17.5	6.81	2	4	2.4	30	1.1245	67.7039
56	2015-03-25	Lincoln, 2015	89.9	9	3	21	32	40	50	61	16.6	18.45	6.96	2	5	6.8	42	1.3845	116.819
69	2015-03-25	Lincoln, 2015	89.8	10	3	22	35	44	61	64	16.9	17.48	6.15	2	5	6.3	58	1.6795	176.822
99	2015-03-25	Lincoln, 2015	87.1	13	3	26	44	59	86	71.2	17.2	19.67	6.63	2	5	10	70	1.6815	116.12
42	2015-03-25	Lincoln, 2015	89.6	8	3	18	26	33	41	47.8	16.2	17.5	6.81	2	4	2.4	23	1.06	39.6189
56	2015-03-25	Lincoln, 2015	89.9	9	3	21	32	40	50	61	16.6	18.45	6.96	2	5	5.8	40	1.899	76.9406
69	2015-03-25	Lincoln, 2015	89.8	10	3	22	35	44	61	64	16.9	17.48	6.15	2	5	8.1	53	2.642	112.741
99	2015-03-25	Lincoln, 2015	87.1	13	3	26	44	59	86	71.2	17.2	19.67	6.63	2	5	10	63	3.1565	70.6869
20	2015-04-14	Lincoln, 2015	86	4	4	7	9	14	16	14.4	15.6	11.74	5.7	1	1	1	15	0.4155	1.71231
20	2015-04-14	Lincoln, 2015	86	4	4	7	9	14	16	14.4	15.6	11.74	5.7	2	2	1.1	14	0.46	3.44264
20	2015-04-14	Lincoln, 2015	86	4	4	7	9	14	16	14.4	15.6	11.74	5.7	1	1	1	14	0.6625	2.31372
20	2015-04-14	Lincoln, 2015	86	4	4	7	9	14	16	14.4	15.6	11.74	5.7	2	2	1.1	11	0.743	3.09359
20	2015-04-14	Lincoln, 2015	86	4	4	7	9	14	16	14.4	15.6	11.74	5.7	1	1	1	15	0.507	26.4552
20	2015-04-14	Lincoln, 2015	86	4	4	7	9	14	16	14.4	15.6	11.74	5.7	1	1	1	12	0.46	3.22515
20	2015-04-14	Lincoln, 2015	86	4	4	7	9	14	16	14.4	15.6	11.74	5.7	1	1	1	16	0.559	1.33382
20	2015-04-14	Lincoln, 2015	86	4	4	7	9	14	16	14.4	15.6	11.74	5.7	1	1	1.1	11	0.705	2.83659
20	2015-04-14	Lincoln, 2015	86	4	4	7	9	14	16	14.4	15.6	11.74	5.7	3	3	1	11	0.34	10.7957
20	2015-04-14	Lincoln, 2015	86	4	4	7	9	14	16	14.4	15.6	11.74	5.7	1	1	1	14	0.58	2.58969
20	2015-04-14	Lincoln, 2015	86	4	4	7	9	14	16	14.4	15.6	11.74	5.7	2	2	1	14	0.6935	5.80184
20	2015-04-14	Lincoln, 2015	86	4	4	7	9	14	16	14.4	15.6	11.74	5.7	1	1	1.4	13	0.6545	4.81657
30	2015-04-24	Lincoln, 2015	84.7	7	4	12	16	22	24	32.6	14.1	11.91	6.2	3	3	1	17	0.769	31.6587
30	2015-04-24	Lincoln, 2015	84.7	7	4	12	16	22	24	32.6	14.1	11.91	6.2	2	2	1.2	14	0.653	13.6678
30	2015-04-24	Lincoln, 2015	84.7	7	4	12	16	22	24	32.6	14.1	11.91	6.2	3	3	1.1	15	0.5825	27.6659
30	2015-04-24	Lincoln, 2015	84.7	7	4	12	16	22	24	32.6	14.1	11.91	6.2	3	2	1.1	16	0.738	21.7641
30	2015-04-24	Lincoln, 2015	84.7	7	4	12	16	22	24	32.6	14.1	11.91	6.2	2	3	1.1	15	0.656	19.7173
30	2015-04-24	Lincoln, 2015	84.7	7	4	12	16	22	24	32.6	14.1	11.91	6.2	3	3	1	13	0.4645	13.3996
30	2015-04-24	Lincoln, 2015	84.7	7	4	12	16	22	24	32.6	14.1	11.91	6.2	3	2	1	18	0.645	24.1784
30	2015-04-24	Lincoln, 2015	84.7	7	4	12	16	22	24	32.6	14.1	11.91	6.2	2	3	1.1	16	0.66	24.1992
30	2015-04-24	Lincoln, 2015	84.7	7	4	12	16	22	24	32.6	14.1	11.91	6.2	3	2	1	12	0.342	30.7144
30	2015-04-24	Lincoln, 2015	84.7	7	4	12	16	22	24	32.6	14.1	11.91	6.2	3	2	1.3	18	0.7325	21.0715
30	2015-04-24	Lincoln, 2015	84.7	7	4	12	16	22	24	32.6	14.1	11.91	6.2	2	3	1.2	17	0.8155	23.5551
30	2015-04-24	Lincoln, 2015	84.7	7	4	12	16	22	24	32.6	14.1	11.91	6.2	3	2	1.3	18	0.817	28.1732
46	2015-05-10	Lincoln, 2015	80.6	13	5	19	25	31	35	78.6	13.9	10.57	5.58	3	4	1.3	20	0.871	91.1399
46	2015-05-10	Lincoln, 2015	80.6	13	5	19	25	31	35	78.6	13.9	10.57	5.58	3	4	1.5	19	0.995	67.0857
46	2015-05-10	Lincoln, 2015	80.6	13	5	19	25	31	35	78.6	13.9	10.57	5.58	3	4	1.6	27	1.5565	60.9881
46	2015-05-10	Lincoln, 2015	80.6	13	5	19	25	31	35	78.6	13.9	10.57	5.58	3	4	1.3	19	0.9945	124.406
46	2015-05-10	Lincoln, 2015	80.6	13	5	19	25	31	35	78.6	13.9	10.57	5.58	3	4	1.5	20	1.184	119.987
46	2015-05-10	Lincoln, 2015	80.6	13	5	19	25	31	35	78.6	13.9	10.57	5.58	3	4	1.5	20	1.076	188.853
46	2015-05-10	Lincoln, 2015	80.6	13	5	19	25	31	35	78.6	13.9	10.57	5.58	2	3	1.7	25	1.2275	88.1584
46	2015-05-10	Lincoln, 2015	80.6	13	5	19	25	31	35	78.6	13.9	10.57	5.58				26	1.452	83.9271
46	2015-05-10	Lincoln, 2015	80.6	13	5	19	25	31	35	78.6	13.9	10.57	5.58	3	4	1.4	20	0.7975	151.271
31	2015-05-25	Lincoln, 2015	72.8	6	5	13	17	20	24	50.6	11.9	6.89	4.66	2	3	1	7	0.4085	46.8329
61	2015-05-25	Lincoln, 2015	78.6	13	5	25	33	42	48	83.2	13	9.36	5.42	3	4	2	31	1.547	89.8963
61	2015-05-25	Lincoln, 2015	78.6	13	5	25	33	42	48	83.2	13	9.36	5.42	3	4	1.8	29	1.673	82.436
31	2015-05-25	Lincoln, 2015	72.8	6	5	13	17	20	24	50.6	11.9	6.89	4.66	3	3	1	7	0.557	56.8819
61	2015-05-25	Lincoln, 2015	78.6	13	5	25	33	42	48	83.2	13	9.36	5.42	3	4	1.9	31	1.6075	62.7607
61	2015-05-25	Lincoln, 2015	78.6	13	5	25	33	42	48	83.2	13	9.36	5.42	3	4	2.2	29	1.772	51.5955
31	2015-05-25	Lincoln, 2015	72.8	6	5	13	17	20	24	50.6	11.9	6.89	4.66	3	2	1	5	0.3055	39.9684
61	2015-05-25	Lincoln, 2015	78.6	13	5	25	33	42	48	83.2	13	9.36	5.42	3	4	1.8	30	1.2205	72.3809
61	2015-05-25	Lincoln, 2015	78.6	13	5	25	33	42	48	83.2	13	9.36	5.42	3	4	1.8	29	1.3305	63.2896
28	2014-04-07	Lincoln, 2014	57.8	14	4	22	25	28	28	37.8	14.8	12.68	5.17	2	3	2	30	1.26875	39.9847
28	2014-04-07	Lincoln, 2014	57.8	14	4	22	25	28	28	37.8	14.8	12.68	5.17	2	3	2	32	1.37375	28.4438
28	2014-04-07	Lincoln, 2014	57.8	14	4	22	25	28	28	37.8	14.8	12.68	5.17	2	3	2	33	1.12625	30.6289
28	2014-04-07	Lincoln, 2014	57.8	14	4	22	25	28	28	37.8	14.8	12.68	5.17	2	3	2	30	0.841875	35.5648
28	2014-04-07	Lincoln, 2014	57.8	14	4	22	25	28	28	37.8	14.8	12.68	5.17	2	3	2	30	0.94	22.069
28	2014-04-07	Lincoln, 2014	57.8	14	4	22	25	28	28	37.8	14.8	12.68	5.17	2	3	2	40	1.565	15.2493
28	2014-04-07	Lincoln, 2014	57.8	14	4	22	25	28	28	37.8	14.8	12.68	5.17	2	3	2	38	1.37375	18.6768
28	2014-04-07	Lincoln, 2014	57.8	14	4	22	25	28	28	37.8	14.8	12.68	5.17	2	3	2	38	0.9825	45.9258
28	2014-04-07	Lincoln, 2014	57.8	14	4	22	25	28	28	37.8	14.8	12.68	5.17	2	2	2	25	0.813125	17.6528
28	2014-04-07	Lincoln, 2014	57.8	14	4	22	25	28	28	37.8	14.8	12.68	5.17	2	2	2	33	0.999375	11.6794
42	2014-04-21	Lincoln, 2014	53.1	21	4	33	37	41	42	137.6	14.1	10.62	4.12		3	3	37	1.5145	101.46
42	2014-04-21	Lincoln, 2014	53.1	21	4	33	37	41	42	137.6	14.1	10.62	4.12		3	3	38	1.6495	152.136
42	2014-04-21	Lincoln, 2014	53.1	21	4	33	37	41	42	137.6	14.1	10.62	4.12		4	3	40	1.8725	118.577
42	2014-04-21	Lincoln, 2014	53.1	21	4	33	37	41	42	137.6	14.1	10.62	4.12		4	3	33	1.2045	90.7973
42	2014-04-21	Lincoln, 2014	53.1	21	4	33	37	41	42	137.6	14.1	10.62	4.12		4	3	40	1.496	128.061
42	2014-04-21	Lincoln, 2014	53.1	21	4	33	37	41	42	137.6	14.1	10.62	4.12		4	3	38	1.5035	189.989
42	2014-04-21	Lincoln, 2014	53.1	21	4	33	37	41	42	137.6	14.1	10.62	4.12		3	3	35	1.288	168.394
42	2014-04-21	Lincoln, 2014	53.1	21	4	33	37	41	42	137.6	14.1	10.62	4.12		4	3	40	1.33	168.157
42	2014-04-21	Lincoln, 2014	53.1	21	4	33	37	41	42	137.6	14.1	10.62	4.12		4	3	33	1.6735	142.53
28	2014-05-05	Lincoln, 2014	37.4	13	5	19	22	26	28	159.8	11.8	6.78	2.99		3	1	4	0.1635	74.4752
28	2014-05-05	Lincoln, 2014	37.4	13	5	19	22	26	28	159.8	11.8	6.78	2.99		4	1	8	0.143	66.7788
28	2014-05-05	Lincoln, 2014	37.4	13	5	19	22	26	28	159.8	11.8	6.78	2.99		3	1	10	0.3405	79.9839
56	2014-05-05	Lincoln, 2014	47.4	27	5	41	47	54	56	197.6	13.3	9.91	4.17		4	3	39	1.455	152.535
56	2014-05-05	Lincoln, 2014	47.4	27	5	41	47	54	56	197.6	13.3	9.91	4.17		4	3	40	1.3435	215.467
56	2014-05-05	Lincoln, 2014	47.4	27	5	41	47	54	56	197.6	13.3	9.91	4.17		4	3	38	1.59	153.684
56	2014-05-05	Lincoln, 2014	47.4	27	5	41	47	54	56	197.6	13.3	9.91	4.17		4	3	40	1.0125	129.425
56	2014-05-05	Lincoln, 2014	47.4	27	5	41	47	54	56	197.6	13.3	9.91	4.17		4	3	40	1.038	250.524
56	2014-05-05	Lincoln, 2014	47.4	27	5	41	47	54	56	197.6	13.3	9.91	4.17		4	3	45	1.554	158.443
28	2014-05-19	Lincoln, 2014	26	12	5	17	21	25	26	90.8	10.8	7.13	4.53	3	3	1	6	0.269	41.5451
28	2014-05-19	Lincoln, 2014	26	12	5	17	21	25	26	90.8	10.8	7.13	4.53	3	4	1	6	0.228	50.7206
28	2014-05-19	Lincoln, 2014	26	12	5	17	21	25	26	90.8	10.8	7.13	4.53	2	4	1	7	0.133	55.7734
70	2014-05-19	Lincoln, 2014	42.3	33	5	50	58	66	68	228.4	12.8	9.22	4.28		4	3	26	1.3115	167.192
70	2014-05-19	Lincoln, 2014	42.3	33	5	50	58	66	68	228.4	12.8	9.22	4.28		5	3	44	1.6495	222.652
70	2014-05-19	Lincoln, 2014	42.3	33	5	50	58	66	68	228.4	12.8	9.22	4.28		5	3	45	1.272	199.41
29	2014-06-03	Lincoln, 2014	20.9	6	6	11	13	17	21	44.6	10.4	6.25	5.06		3	1	5	0.1475	43.1179
29	2014-06-03	Lincoln, 2014	20.9	6	6	11	13	17	21	44.6	10.4	6.25	5.06		4	1	6	0.238	36.6038
29	2014-06-03	Lincoln, 2014	20.9	6	6	11	13	17	21	44.6	10.4	6.25	5.06		3	1	4	0.2465	30.2339
43	2014-06-03	Lincoln, 2014	24.1	12	6	19	23	30	35	104.6	10.6	6.75	4.82		4	1	7	0.242	38.1772
43	2014-06-03	Lincoln, 2014	24.1	12	6	19	23	30	35	104.6	10.6	6.75	4.82		4	1	6	0.2305	22.4085
29	2014-06-03	Lincoln, 2014	20.9	6	6	11	13	17	21	44.6	10.4	5.92	5.7		4	1	3	0.1005	12.926
29	2014-06-03	Lincoln, 2014	20.9	6	6	11	13	17	21	44.6	10.4	5.92	5.7		3	1	6	0.235	32.951
29	2014-06-03	Lincoln, 2014	20.9	6	6	11	13	17	21	44.6	10.4	5.92	5.7		2	1	7	0.19	24.8155
85	2014-06-03	Lincoln, 2014	38.4	33	6	52	60	71	77	242.2	12.3	8.66	4.47		5	3	32	1.165	140.045
85	2014-06-03	Lincoln, 2014	38.4	33	6	52	60	71	77	242.2	12.3	8.66	4.47		5	3	42	1.372	185.975
85	2014-06-03	Lincoln, 2014	38.4	33	6	52	60	71	77	242.2	12.3	8.66	4.47		5	3	38	1.569	188.178
33	2015-11-02	Lincoln, 2015	64.1	2	11	2	7	14	27	8.8	12.2	19.37	7.7	1	1	3	34	2.359	0.609385
33	2015-11-02	Lincoln, 2015	64.1	2	11	2	7	14	27	8.8	12.2	19.37	7.7	1	1	3	41	2.9785	0.652058
33	2015-11-02	Lincoln, 2015	64.1	2	11	2	7	14	27	8.8	12.2	19.37	7.7	1	1	3	32	1.9545	1.23834
33	2015-11-02	Lincoln, 2015	64.1	2	11	2	7	14	27	8.8	12.2	19.37	7.7	1	1	3	34	1.9785	0.808322
33	2015-11-02	Lincoln, 2015	64.1	2	11	2	7	14	27	8.8	12.2	19.37	7.7	1	1	3	37	1.6405	1.02665
33	2015-11-02	Lincoln, 2015	64.1	2	11	2	7	14	27	8.8	12.2	19.37	7.7	1	1	3	40	2.7135	0.376021
33	2015-11-02	Lincoln, 2015	64.1	2	11	2	7	14	27	8.8	12.2	19.37	7.7	2	1	3	39	2.5285	0.682074
33	2015-11-02	Lincoln, 2015	64.1	2	11	2	7	14	27	8.8	12.2	19.37	7.7	1	1	3	41	2.164	0.960155
33	2015-11-02	Lincoln, 2015	64.1	2	11	2	7	14	27	8.8	12.2	19.37	7.7	1	2	3	40	2.7425	0.835284
33	2015-11-02	Lincoln, 2015	64.1	2	11	2	7	14	27	8.8	12.2	19.37	7.7	1	1	3	35	2.173	0.498672
33	2015-11-02	Lincoln, 2015	64.1	2	11	2	7	14	27	8.8	12.2	19.37	7.7	1	1	3	36	2.1415	0.75028
33	2015-11-02	Lincoln, 2015	64.1	2	11	2	7	14	27	8.8	12.2	19.37	7.7	1	1	3	34	1.846	0.72515
51	2015-11-20	Lincoln, 2015	68	5	11	6	13	24	41	22	12.1	20.23	7.45	1	2	3	69	5.03	2.8722
51	2015-11-20	Lincoln, 2015	68	5	11	6	13	24	41	22	12.1	20.23	7.45	1	2	3	63	4.15	1.43885
51	2015-11-20	Lincoln, 2015	68	5	11	6	13	24	41	22	12.1	20.23	7.45	1	2	3	67	5.55	1.74439
51	2015-11-20	Lincoln, 2015	68	5	11	6	13	24	41	22	12.1	20.23	7.45	1	2	3	59	4.79	2.05908
51	2015-11-20	Lincoln, 2015	68	5	11	6	13	24	41	22	12.1	20.23	7.45	1	2	3	67	4.545	1.89185
51	2015-11-20	Lincoln, 2015	68	5	11	6	13	24	41	22	12.1	20.23	7.45	1	2	3	67	3.88	1.34545
51	2015-11-20	Lincoln, 2015	68	5	11	6	13	24	41	22	12.1	20.23	7.45	1	2	3	65	4.095	2.63887
51	2015-11-20	Lincoln, 2015	68	5	11	6	13	24	41	22	12.1	20.23	7.45	1	2	3	64	4.135	2.10484
51	2015-11-20	Lincoln, 2015	68	5	11	6	13	24	41	22	12.1	20.23	7.45	1	2	3	70	4.265	1.61889
51	2015-11-20	Lincoln, 2015	68	5	11	6	13	24	41	22	12.1	20.23	7.45	1	2	3	67	4.34	3.12619
51	2015-11-20	Lincoln, 2015	68	5	11	6	13	24	41	22	12.1	20.23	7.45	1	2	3	66	5.095	1.98334
51	2015-11-20	Lincoln, 2015	68	5	11	6	13	24	41	22	12.1	20.23	7.45	1	2	3	70	5.045	1.51551
49	2016-01-23	Lincoln, 2016	79.5	5	1	9	18	27	39	21.6	15.18	23.14	7.08	2	3	7	70	3.133	13.9289
49	2016-01-23	Lincoln, 2016	79.5	5	1	9	18	27	39	21.6	15.18	23.14	7.08	2	3	7	63	3.3445	13.1276
49	2016-01-23	Lincoln, 2016	79.5	5	1	9	18	27	39	21.6	15.18	23.14	7.08	2	4	7	61	3.418	17.4941
49	2016-01-23	Lincoln, 2016	79.5	5	1	9	18	27	39	21.6	15.18	23.14	7.08	2	2	7	61	2.733	6.38749
49	2016-01-23	Lincoln, 2016	79.5	5	1	9	18	27	39	21.6	15.18	23.14	7.08	2	3	7	60	3.449	18.1087
49	2016-01-23	Lincoln, 2016	79.5	5	1	9	18	27	39	21.6	15.18	23.14	7.08	2	3	7	68	5.8775	23.0288
49	2016-01-23	Lincoln, 2016	79.5	5	1	9	18	27	39	21.6	15.18	23.14	7.08	2	3	7	55	2.6045	18.8103
49	2016-01-23	Lincoln, 2016	79.5	5	1	9	18	27	39	21.6	15.18	23.14	7.08	1	3	7	70	6.085	3.43321
49	2016-01-23	Lincoln, 2016	79.5	5	1	9	18	27	39	21.6	15.18	23.14	7.08	2	3	7	62	4.018	12.3364
49	2016-01-23	Lincoln, 2016	79.5	5	1	9	18	27	39	21.6	15.18	23.14	7.08	2	3	7	71	4.3345	10.0476
49	2016-01-23	Lincoln, 2016	79.5	5	1	9	18	27	39	21.6	15.18	23.14	7.08	2	4	7	63	3.034	11.408
49	2016-01-23	Lincoln, 2016	79.5	5	1	9	18	27	39	21.6	15.18	23.14	7.08	2	3	7	65	4.2945	18.0882
64	2016-02-07	Lincoln, 2016	78.3	10	2	16	29	39	53	33.6	15.8	21.8	6.68	2	3	8	75	3.375	26.67
64	2016-02-07	Lincoln, 2016	78.3	10	2	16	29	39	53	33.6	15.8	21.8	6.68	2	3	8	76	4.77	33.7425
64	2016-02-07	Lincoln, 2016	78.3	10	2	16	29	39	53	33.6	15.8	21.8	6.68	2	4	8	73	3.095	64.4481
64	2016-02-07	Lincoln, 2016	78.3	10	2	16	29	39	53	33.6	15.8	21.8	6.68	2	4	8	73	4.32	46.8549
64	2016-02-07	Lincoln, 2016	78.3	10	2	16	29	39	53	33.6	15.8	21.8	6.68	2	4	8	70	3.755	68.891
64	2016-02-07	Lincoln, 2016	78.3	10	2	16	29	39	53	33.6	15.8	21.8	6.68	2	3	8	77	5.9	40.8969
64	2016-02-07	Lincoln, 2016	78.3	10	2	16	29	39	53	33.6	15.8	21.8	6.68	2	3	8	68	2.885	45.2357
64	2016-02-07	Lincoln, 2016	78.3	10	2	16	29	39	53	33.6	15.8	21.8	6.68	2	4	8	68	3.57	56.7407
64	2016-02-07	Lincoln, 2016	78.3	10	2	16	29	39	53	33.6	15.8	21.8	6.68	2	4	8	60	3.23	68.396
64	2016-02-07	Lincoln, 2016	78.3	10	2	16	29	39	53	33.6	15.8	21.8	6.68	3	4	8	74	3.56	43.05
64	2016-02-07	Lincoln, 2016	78.3	10	2	16	29	39	53	33.6	15.8	21.8	6.68	2	4	8	85	3.715	47.786
64	2016-02-07	Lincoln, 2016	78.3	10	2	16	29	39	53	33.6	15.8	21.8	6.68	2	4	8	70	3.19	115.321
39	2016-04-09	Lincoln, 2016	82.6	6	4	15	25	30	34	43.2	15.95	13.94	5.67	3	4	3.2	30	1.7255	24.6387
39	2016-04-09	Lincoln, 2016	82.6	6	4	15	25	30	34	43.2	15.95	13.94	5.67	2	4	2.8	28	1.447	23.1815
39	2016-04-09	Lincoln, 2016	82.6	6	4	15	25	30	34	43.2	15.95	13.94	5.67	2	3	2.3	25	1.4385	16.4607
39	2016-04-09	Lincoln, 2016	82.6	6	4	15	25	30	34	43.2	15.95	13.94	5.67	2	3	3	48	2.156	12.4859
39	2016-04-09	Lincoln, 2016	82.6	6	4	15	25	30	34	43.2	15.95	13.94	5.67	3	3	1.8	18	0.772	19.7505
39	2016-04-09	Lincoln, 2016	82.6	6	4	15	25	30	34	43.2	15.95	13.94	5.67	3	3	3.1	26	1.5955	22.5691
39	2016-04-09	Lincoln, 2016	82.6	6	4	15	25	30	34	43.2	15.95	13.94	5.67	2	2	2.7	28	1.3535	17.5027
39	2016-04-09	Lincoln, 2016	82.6	6	4	15	25	30	34	43.2	15.95	13.94	5.67	3	4	2.4	30	1.3325	14.5887
39	2016-04-09	Lincoln, 2016	82.6	6	4	15	25	30	34	43.2	15.95	13.94	5.67	2	3	2	25	0.97	25.5318
39	2016-04-09	Lincoln, 2016	82.6	6	4	15	25	30	34	43.2	15.95	13.94	5.67	2	4	2.6	37	1.584	20.3684
39	2016-04-09	Lincoln, 2016	82.6	6	4	15	25	30	34	43.2	15.95	13.94	5.67	2	4	3	28	0.96	35.949
39	2016-04-09	Lincoln, 2016	82.6	6	4	15	25	30	34	43.2	15.95	13.94	5.67	2	3	2.4	35	1.8505	20.8452
52	2016-04-22	Lincoln, 2016	82.7	8	4	21	32	38	46	65.8	15.04	13.48	6.19	3	4	2.8	32	1.5065	26.4696
52	2016-04-22	Lincoln, 2016	82.7	8	4	21	32	38	46	65.8	15.04	13.48	6.19	3	4	2.8	32	1.175	39.0885
52	2016-04-22	Lincoln, 2016	82.7	8	4	21	32	38	46	65.8	15.04	13.48	6.19	3	4	2.3	26	1.0615	55.4527
52	2016-04-22	Lincoln, 2016	82.7	8	4	21	32	38	46	65.8	15.04	13.48	6.19	3	4	2.1	36	1.342	39.6775
52	2016-04-22	Lincoln, 2016	82.7	8	4	21	32	38	46	65.8	15.04	13.48	6.19	3	4	3	27	0.9245	40.4877
52	2016-04-22	Lincoln, 2016	82.7	8	4	21	32	38	46	65.8	15.04	13.48	6.19	2	4		35	1.97	30.5504
52	2016-04-22	Lincoln, 2016	82.7	8	4	21	32	38	46	65.8	15.04	13.48	6.19	3	4	3.3	32	1.0455	24.767
52	2016-04-22	Lincoln, 2016	82.7	8	4	21	32	38	46	65.8	15.04	13.48	6.19	3	4	2.6	22	1.24	33.3565
52	2016-04-22	Lincoln, 2016	82.7	8	4	21	32	38	46	65.8	15.04	13.48	6.19	2	4	2.3	22	0.83	54.3539
52	2016-04-22	Lincoln, 2016	82.7	8	4	21	32	38	46	65.8	15.04	13.48	6.19	2	4	2.6	29	1.0195	73.0263
52	2016-04-22	Lincoln, 2016	82.7	8	4	21	32	38	46	65.8	15.04	13.48	6.19	2	4	3.4	20	1.191	55.3028
52	2016-04-22	Lincoln, 2016	82.7	8	4	21	32	38	46	65.8	15.04	13.48	6.19	2	4	3.1	33	1.3045	33.3004
70	2016-05-10	Lincoln, 2016	83.3	9	5	25	40	46	61	118	14.73	12.06	5.8	2	4		40	1.433	66.06
70	2016-05-10	Lincoln, 2016	83.3	9	5	25	40	46	61	118	14.73	12.06	5.8	2	5		21	0.731	39.8908
70	2016-05-10	Lincoln, 2016	83.3	9	5	25	40	46	61	118	14.73	12.06	5.8	2	5		26	0.7485	59.6056
70	2016-05-10	Lincoln, 2016	83.3	9	5	25	40	46	61	118	14.73	12.06	5.8	2	5		47	1.312	39.536
70	2016-05-10	Lincoln, 2016	83.3	9	5	25	40	46	61	118	14.73	12.06	5.8	2	5		28	0.77	58.958
70	2016-05-10	Lincoln, 2016	83.3	9	5	25	40	46	61	118	14.73	12.06	5.8	2	4	3.4	20	1.0685	73.1522
70	2016-05-10	Lincoln, 2016	83.3	9	5	25	40	46	61	118	14.73	12.06	5.8	2	5	4.7	30	0.898	70.0072
70	2016-05-10	Lincoln, 2016	83.3	9	5	25	40	46	61	118	14.73	12.06	5.8	2	5	4.1	32	1.3365	39.8666
70	2016-05-10	Lincoln, 2016	83.3	9	5	25	40	46	61	118	14.73	12.06	5.8	2	4		31	0.797	51.215
70	2016-05-10	Lincoln, 2016	83.3	9	5	25	40	46	61	118	14.73	12.06	5.8	2	5		30	0.733	88.5748
70	2016-05-10	Lincoln, 2016	83.3	9	5	25	40	46	61	118	14.73	12.06	5.8	2	4		28	1.0215	62.7414
70	2016-05-10	Lincoln, 2016	83.3	9	5	25	40	46	61	118	14.73	12.06	5.8	2	3		25	0.979	42.9308
85	2016-05-25	Lincoln, 2016	83.4	10	5	27	44	52	70	122.6	14.38	10.97	5.62	2	5	3.1	28	0.81	34.334
85	2016-05-25	Lincoln, 2016	83.4	10	5	27	44	52	70	122.6	14.38	10.97	5.62	2	5	1.9	26	0.7915	39.2144
85	2016-05-25	Lincoln, 2016	83.4	10	5	27	44	52	70	122.6	14.38	10.97	5.62	2	4	2.6	26	0.817	23.6957
85	2016-05-25	Lincoln, 2016	83.4	10	5	27	44	52	70	122.6	14.38	10.97	5.62	2	5	3	45	1.5435	64.1606
85	2016-05-25	Lincoln, 2016	83.4	10	5	27	44	52	70	122.6	14.38	10.97	5.62	2	5	3.4	28	0.645	52.5495
85	2016-05-25	Lincoln, 2016	83.4	10	5	27	44	52	70	122.6	14.38	10.97	5.62	2	4	4.1	38	1.3435	32.642
85	2016-05-25	Lincoln, 2016	83.4	10	5	27	44	52	70	122.6	14.38	10.97	5.62	2	4	2.6	31	0.9175	32.7381
85	2016-05-25	Lincoln, 2016	83.4	10	5	27	44	52	70	122.6	14.38	10.97	5.62	2	4	3.8	34	1.0585	29.7939
85	2016-05-25	Lincoln, 2016	83.4	10	5	27	44	52	70	122.6	14.38	10.97	5.62	2	5	3.9	23	0.4485	61.356
85	2016-05-25	Lincoln, 2016	83.4	10	5	27	44	52	70	122.6	14.38	10.97	5.62	2	5	4.1	24	0.969	29.4292
85	2016-05-25	Lincoln, 2016	83.4	10	5	27	44	52	70	122.6	14.38	10.97	5.62	2	4	2.5	41	0.47	81.8734
85	2016-05-25	Lincoln, 2016	83.4	10	5	27	44	52	70	122.6	14.38	10.97	5.62	2	5	2.9	36	0.6785	39.9925

## Sheet: Fig. 4 Independent data
Regrowth began	Sampling Date	Days in regrowth period	Cultivar	Location	Weather Station	Distance to station		Sum Rainfall	Humidity >95%	Predicted Coumestrol	Actual HPLC result
2015-01-15	2015-03-12	56		Island 3	Windsor	22 km		55	10	48.018	83.16
2015-01-15	2015-03-12	56		Island 3	Windsor	22 km		55	10	48.018	70.63
2016-03-07	2016-04-01	25	Stamina 5	I12	Broadfield			33.8	5	18.6841	17.8688
2016-03-07	2016-04-01	25	Stamina 5	I12	Broadfield			33.8	5	18.6841	17.4011
2016-03-07	2016-04-11	35	Stamina 5	I12	Broadfield			38.6	5	19.8918	48.0802
2016-03-07	2016-04-11	35	Stamina 5	I12	Broadfield			38.6	5	19.8918	30.0735
2016-03-07	2016-04-11	35	Stamina 5	I12	Broadfield			38.6	5	19.8918	22.2884
2016-03-07	2016-04-22	46	Stamina 5	I12	Broadfield			42.6	7	30.4982	35.5827
2016-03-07	2016-04-22	46	Stamina 5	I12	Broadfield			42.6	7	30.4982	31.4608
2016-03-07	2016-04-22	46	Stamina 5	I12	Broadfield			42.6	7	30.4982	48.5549
1963-07-15	1963-09-03	50	Ranger	Brookings, South Dakota	Brookings NE Weather Station, Sioux Falls	90 km		260	2	61.196	80
1963-07-15	1963-09-13	60	Ranger	Brookings, South Dakota	Brookings NE Weather Station	90 km		263.9	2	62.1772	103.3
1961-06-15	1961-08-21	67	Lahontan	Logan, Utah	Logan-Cache, Utah			25.5	0	-7.4042	11.5
1961-06-15	1961-08-21	67	Ranger	Logan, Utah	Logan-Cache, Utah			25.5	0	-7.4042	8
1961-06-15	1961-08-06	52	Lahontan	Logan, Utah	Logan-Cache, Utah			16.5	0	-9.6686	8.5
1961-06-15	1961-08-06	52	Ranger	Logan, Utah	Logan-Cache, Utah			16.5	0	-9.6686	5.5
1961-06-15	1961-07-27	42	Lahontan	Logan, Utah	Logan-Cache, Utah			16.5	0	-9.6686	3.5
1961-06-15	1961-07-27	42	Ranger	Logan, Utah	Logan-Cache, Utah			16.5	0	-9.6686	5
1961-06-16	1961-06-30	14	Lahontan	Logan, Utah	Logan-Cache, Utah			1.3	0	-13.4929	6
1961-06-16	1961-06-30	14	Ranger	Logan, Utah	Logan-Cache, Utah			1.3	0	-13.4929	6.5
1980-02-12	1980-03-07	24	Wairau	Lincoln	Broadfield Edl			74.6	4	24.1494	11.1111
1980-02-12	1980-03-07	24	Saranac	Lincoln	Broadfield Edl			74.6	4	24.1494	11.1111
1980-02-12	1980-03-07	24	Washoe	Lincoln	Broadfield Edl			74.6	4	24.1494	13.8889
1980-02-12	1980-03-14	31	Wairau	Lincoln	Broadfield Edl			107.4	6	42.0018	27.7778
1980-02-12	1980-03-14	31	Saranac	Lincoln	Broadfield Edl			107.4	6	42.0018	25
1980-02-12	1980-03-14	31	Washoe	Lincoln	Broadfield Edl			107.4	6	42.0018	30.5556
1980-02-12	1980-03-21	38	Wairau	Lincoln	Broadfield Edl			113.5	6	43.5366	83.3333
1980-02-12	1980-03-21	38	Saranac	Lincoln	Broadfield Edl			113.5	6	43.5366	61.1111
1980-02-12	1980-03-21	38	Washoe	Lincoln	Broadfield Edl			113.5	6	43.5366	100
1980-02-12	1980-03-28	45	Wairau	Lincoln	Broadfield Edl			125.2	6	46.4803	55.5556
1980-02-12	1980-03-28	45	Saranac	Lincoln	Broadfield Edl			125.2	6	46.4803	33.3333
1980-02-12	1980-03-28	45	Washoe	Lincoln	Broadfield Edl			125.2	6	46.4803	66.6667
1980-02-12	1980-04-03	51	Wairau	Lincoln	Broadfield Edl			143.4	6	51.0594	66.6667
1980-02-12	1980-04-03	51	Saranac	Lincoln	Broadfield Edl			143.4	6	51.0594	83.3333
1980-02-12	1980-04-03	51	Washoe	Lincoln	Broadfield Edl			143.4	6	51.0594	88.8889
1980-02-12	1980-04-11	59	Wairau	Lincoln	Broadfield Edl			163.4	8	65.6914	138.889
1980-02-12	1980-04-11	59	Saranac	Lincoln	Broadfield Edl			163.4	8	65.6914	116.667
1980-02-12	1980-04-11	59	Washoe	Lincoln	Broadfield Edl			163.4	8	65.6914	136.111
1980-02-12	1980-04-17	65	Wairau	Lincoln	Broadfield Edl			145.7	10	70.8381
1980-02-12	1980-04-17	65	Saranac	Lincoln	Broadfield Edl			145.7	10	70.8381	127.778
1980-02-12	1980-04-17	65	Washoe	Lincoln	Broadfield Edl			145.7	10	70.8381	142
1980-03-08	1980-03-28	20	Wairau	Lincoln	Broadfield Edl			50.6	2	8.51096	8.3333
1980-03-08	1980-03-28	20	Saranac	Lincoln	Broadfield Edl			50.6	2	8.51096	8.3333
1980-03-08	1980-03-28	20	Washoe	Lincoln	Broadfield Edl			50.6	2	8.51096	13.8889
1980-03-08	1980-04-03	26	Wairau	Lincoln	Broadfield Edl			60.7	2	11.0521	19.4444
1980-03-08	1980-04-03	26	Saranac	Lincoln	Broadfield Edl			60.7	2	11.0521	19.4444
1980-03-08	1980-04-03	26	Washoe	Lincoln	Broadfield Edl			60.7	2	11.0521	19.4444
1980-03-08	1980-04-11	34	Wairau	Lincoln	Broadfield Edl			68.8	4	22.6901	55.5556
1980-03-08	1980-04-11	34	Saranac	Lincoln	Broadfield Edl			68.8	4	22.6901	50
1980-03-08	1980-04-11	34	Washoe	Lincoln	Broadfield Edl			68.8	4	22.6901	80.5556
1980-03-08	1980-04-17	40	Wairau	Lincoln	Broadfield Edl			71.1	6	32.8688	83.3333
1980-03-08	1980-04-17	40	Saranac	Lincoln	Broadfield Edl			71.1	6	32.8688	111.111
1980-03-08	1980-04-17	40	Washoe	Lincoln	Broadfield Edl			71.1	6	32.8688	133.333

## Sheet: Eq. 4 Predicted v. actual
Date	Year	Location	Rainfall (mm)	Days above 95% RH	Predicted Coumestrol (Equation 4)	Actual Coumestrol (mg/kg DM)
2015-02-09	2015	Ashley Dene	16.6	4	10.6997	14.1507
2015-02-09	2015	Ashley Dene	16.6	4	10.6997	26.991
2015-02-09	2015	Ashley Dene	16.6	4	10.6997	29.013
2015-02-09	2015	Ashley Dene	16.6	4	10.6997	18.3078
2015-02-09	2015	Ashley Dene	16.6	4	10.6997	14.5047
2015-02-09	2015	Ashley Dene	16.6	4	10.6997	7.2632
2015-02-09	2015	Ashley Dene	16.6	4	10.6997	7.7274
2015-02-09	2015	Ashley Dene	16.6	4	10.6997	7.4192
2015-02-09	2015	Ashley Dene	16.6	4	10.6997	10.4826
2015-02-09	2015	Ashley Dene	16.6	4	10.6997	23.0137
2015-03-05	2015	Ashley Dene	27.8	8	30.0437	16.6699
2015-03-05	2015	Ashley Dene	27.8	8	30.0437	28.3978
2015-03-05	2015	Ashley Dene	27.8	8	30.0437	29.3899
2015-03-05	2015	Ashley Dene	27.8	8	30.0437	31.3703
2015-03-05	2015	Ashley Dene	27.8	8	30.0437	22.1065
2015-03-05	2015	Ashley Dene	27.8	8	30.0437	12.114
2015-03-05	2015	Ashley Dene	27.8	8	30.0437	27.3372
2015-03-05	2015	Ashley Dene	27.8	8	30.0437	12.6286
2015-03-05	2015	Ashley Dene	27.8	8	30.0437	13.8911
2015-03-05	2015	Ashley Dene	27.8	8	30.0437	11.5809
2015-05-02	2015	Ashley Dene	77.6	6	41.8284	44.8985
2015-05-02	2015	Ashley Dene	77.6	6	41.8284	40.0235
2015-05-02	2015	Ashley Dene	77.6	6	41.8284	31.9448
2015-05-02	2015	Ashley Dene	77.6	6	41.8284	43.4019
2015-05-02	2015	Ashley Dene	77.6	6	41.8284	78.5461
2015-05-02	2015	Ashley Dene	77.6	6	41.8284	34.9869
2015-05-02	2015	Ashley Dene	77.6	6	41.8284	47.3307
2015-05-02	2015	Ashley Dene	77.6	6	41.8284	48.2553
2015-05-02	2015	Ashley Dene	77.6	6	41.8284	24.8855
2015-05-02	2015	Ashley Dene	77.6	6	41.8284	36.6037
2015-05-02	2015	Ashley Dene	77.6	6	41.8284	46.457
2015-05-02	2015	Ashley Dene	77.6	6	41.8284	37.7063
2015-05-02	2015	Ashley Dene	77.6	6	41.8284	45.847
2015-05-02	2015	Ashley Dene	77.6	6	41.8284	52.8935
2015-05-02	2015	Ashley Dene	77.6	6	41.8284	26.1502
2015-05-17	2015	Ashley Dene	81.8	10	58.4612	49.0663
2015-05-17	2015	Ashley Dene	81.8	10	58.4612	49.5283
2015-05-17	2015	Ashley Dene	81.8	10	58.4612	55.5471
2015-05-17	2015	Ashley Dene	81.8	10	58.4612	39.52
2015-05-17	2015	Ashley Dene	81.8	10	58.4612	59.4583
2015-05-17	2015	Ashley Dene	81.8	10	58.4612	29.7627
2015-05-17	2015	Ashley Dene	81.8	10	58.4612	43.8113
2015-05-17	2015	Ashley Dene	81.8	10	58.4612	55.9807
2015-05-17	2015	Ashley Dene	81.8	10	58.4612	50.32
2015-05-17	2015	Ashley Dene	81.8	10	58.4612	71.6318
2015-05-17	2015	Ashley Dene	81.8	10	58.4612	66.8943
2015-05-17	2015	Ashley Dene	81.8	10	58.4612	66.3558
2015-05-17	2015	Ashley Dene	81.8	10	58.4612	71.0239
2015-05-17	2015	Ashley Dene	81.8	10	58.4612	65.5313
2015-05-17	2015	Ashley Dene	81.8	10	58.4612	69.2196
2014-12-16	2014	Lincoln, 2014	57.2	1	15.7952	5.1796
2014-12-16	2014	Lincoln, 2014	41.4	1	9.6174	6.6415
2014-12-16	2014	Lincoln, 2014	84.4	3	33.8104	15.8321
2014-12-16	2014	Lincoln, 2014	57.2	1	15.7952	6.7288
2014-12-16	2014	Lincoln, 2014	41.4	1	9.6174	10.6223
2014-12-16	2014	Lincoln, 2014	84.4	3	33.8104	11.9202
2014-12-16	2014	Lincoln, 2014	57.2	1	15.7952	5.8816
2014-12-16	2014	Lincoln, 2014	41.4	1	9.6174	8.101
2014-12-16	2014	Lincoln, 2014	84.4	3	33.8104	13.2605
2015-01-14	2015	Lincoln, 2015	7.2	2	-0.0648	5.0737
2015-01-14	2015	Lincoln, 2015	7.2	2	-0.0648	1.8299
2015-01-14	2015	Lincoln, 2015	48.6	3	19.8126	3.3247
2015-01-14	2015	Lincoln, 2015	7.2	2	-0.0648	2.9966
2015-01-14	2015	Lincoln, 2015	7.2	2	-0.0648	6.3609
2015-01-14	2015	Lincoln, 2015	7.2	2	-0.0648	2.009
2015-01-14	2015	Lincoln, 2015	48.6	3	19.8126	3.1236
2015-01-14	2015	Lincoln, 2015	7.2	2	-0.0648	2.2365
2015-01-14	2015	Lincoln, 2015	7.2	2	-0.0648	4.5336
2015-01-14	2015	Lincoln, 2015	7.2	2	-0.0648	2.2081
2015-01-14	2015	Lincoln, 2015	48.6	3	19.8126	4.1478
2015-01-14	2015	Lincoln, 2015	7.2	2	-0.0648	3.1217
2015-01-28	2015	Lincoln, 2015	10.2	4	8.4882	2.1987
2015-01-28	2015	Lincoln, 2015	10.2	4	8.4882	3.3438
2015-01-28	2015	Lincoln, 2015	10.2	4	8.4882	2.1296
2015-01-28	2015	Lincoln, 2015	10.2	4	8.4882	4.8216
2015-01-28	2015	Lincoln, 2015	10.2	4	8.4882	4.247
2015-02-11	2015	Lincoln, 2015	16.2	3	7.1442	3.6471
2015-02-11	2015	Lincoln, 2015	16.2	3	7.1442	0.9598
2015-02-11	2015	Lincoln, 2015	23.4	5	17.3394	1.8877
2015-02-11	2015	Lincoln, 2015	16.2	3	7.1442	4.2745
2015-02-11	2015	Lincoln, 2015	16.2	3	7.1442	4.2687
2015-02-11	2015	Lincoln, 2015	23.4	5	17.3394	1.7355
2015-02-11	2015	Lincoln, 2015	16.2	3	7.1442	8.6402
2015-02-11	2015	Lincoln, 2015	16.2	3	7.1442	3.3882
2015-02-11	2015	Lincoln, 2015	23.4	5	17.3394	5.5793
2015-02-25	2015	Lincoln, 2015	21.6	4	12.9456	5.6696
2015-02-25	2015	Lincoln, 2015	24.6	6	21.4986	13.6087
2015-02-25	2015	Lincoln, 2015	31.8	8	31.6938	7.218
2015-02-25	2015	Lincoln, 2015	21.6	4	12.9456	12.9185
2015-02-25	2015	Lincoln, 2015	24.6	6	21.4986	16.6691
2015-02-25	2015	Lincoln, 2015	31.8	8	31.6938	18.2436
2015-02-25	2015	Lincoln, 2015	21.6	4	12.9456	11.5558
2015-02-25	2015	Lincoln, 2015	24.6	6	21.4986	22.6924
2015-02-25	2015	Lincoln, 2015	31.8	8	31.6938	12.8127
2015-03-11	2015	Lincoln, 2015	28	5	19.138	9.994
2015-03-11	2015	Lincoln, 2015	41.2	6	27.9892	13.2848
2015-03-11	2015	Lincoln, 2015	44.2	7	32.8522	26.1713
2015-03-11	2015	Lincoln, 2015	51.4	10	46.7374	39.4236
2015-03-11	2015	Lincoln, 2015	28	5	19.138	13.0718
2015-03-11	2015	Lincoln, 2015	41.2	6	27.9892	31.0372
2015-03-11	2015	Lincoln, 2015	44.2	7	32.8522	50.9109
2015-03-11	2015	Lincoln, 2015	51.4	10	46.7374	37.6806
2015-03-11	2015	Lincoln, 2015	28	5	19.138	15.5832
2015-03-11	2015	Lincoln, 2015	41.2	6	27.9892	30.5375
2015-03-11	2015	Lincoln, 2015	44.2	7	32.8522	31.1154
2015-03-11	2015	Lincoln, 2015	51.4	10	46.7374	38.8489
2015-03-25	2015	Lincoln, 2015	47.8	8	37.9498	37.1889
2015-03-25	2015	Lincoln, 2015	61	9	46.801	50.106
2015-03-25	2015	Lincoln, 2015	64	10	51.664	116.542
2015-03-25	2015	Lincoln, 2015	71.2	13	65.5492	52.3516
2015-03-25	2015	Lincoln, 2015	47.8	8	37.9498	67.7039
2015-03-25	2015	Lincoln, 2015	61	9	46.801	116.819
2015-03-25	2015	Lincoln, 2015	64	10	51.664	176.822
2015-03-25	2015	Lincoln, 2015	71.2	13	65.5492	116.12
2015-03-25	2015	Lincoln, 2015	47.8	8	37.9498	39.6189
2015-03-25	2015	Lincoln, 2015	61	9	46.801	76.9406
2015-03-25	2015	Lincoln, 2015	64	10	51.664	112.741
2015-03-25	2015	Lincoln, 2015	71.2	13	65.5492	70.6869
2015-04-14	2015	Lincoln, 2015	14.4	4	10.1304	1.7123
2015-04-14	2015	Lincoln, 2015	14.4	4	10.1304	3.4426
2015-04-14	2015	Lincoln, 2015	14.4	4	10.1304	2.3137
2015-04-14	2015	Lincoln, 2015	14.4	4	10.1304	3.0936
2015-04-14	2015	Lincoln, 2015	14.4	4	10.1304	26.4552
2015-04-14	2015	Lincoln, 2015	14.4	4	10.1304	3.2252
2015-04-14	2015	Lincoln, 2015	14.4	4	10.1304	1.3338
2015-04-14	2015	Lincoln, 2015	14.4	4	10.1304	2.8366
2015-04-14	2015	Lincoln, 2015	14.4	4	10.1304	10.7957
2015-04-14	2015	Lincoln, 2015	14.4	4	10.1304	2.5897
2015-04-14	2015	Lincoln, 2015	14.4	4	10.1304	5.8018
2015-04-14	2015	Lincoln, 2015	14.4	4	10.1304	4.8166
2015-04-24	2015	Lincoln, 2015	32.6	7	28.3166	31.6587
2015-04-24	2015	Lincoln, 2015	32.6	7	28.3166	13.6678
2015-04-24	2015	Lincoln, 2015	32.6	7	28.3166	27.6659
2015-04-24	2015	Lincoln, 2015	32.6	7	28.3166	21.7641
2015-04-24	2015	Lincoln, 2015	32.6	7	28.3166	19.7173
2015-04-24	2015	Lincoln, 2015	32.6	7	28.3166	13.3996
2015-04-24	2015	Lincoln, 2015	32.6	7	28.3166	24.1784
2015-04-24	2015	Lincoln, 2015	32.6	7	28.3166	24.1992
2015-04-24	2015	Lincoln, 2015	32.6	7	28.3166	30.7144
2015-04-24	2015	Lincoln, 2015	32.6	7	28.3166	21.0715
2015-04-24	2015	Lincoln, 2015	32.6	7	28.3166	23.5551
2015-04-24	2015	Lincoln, 2015	32.6	7	28.3166	28.1732
2015-05-10	2015	Lincoln, 2015	78.6	13	68.4426	91.1399
2015-05-10	2015	Lincoln, 2015	78.6	13	68.4426	67.0857
2015-05-10	2015	Lincoln, 2015	78.6	13	68.4426	60.9881
2015-05-10	2015	Lincoln, 2015	78.6	13	68.4426	124.406
2015-05-10	2015	Lincoln, 2015	78.6	13	68.4426	119.987
2015-05-10	2015	Lincoln, 2015	78.6	13	68.4426	188.853
2015-05-10	2015	Lincoln, 2015	78.6	13	68.4426	88.1584
2015-05-10	2015	Lincoln, 2015	78.6	13	68.4426	83.9271
2015-05-10	2015	Lincoln, 2015	78.6	13	68.4426	151.271
2015-05-25	2015	Lincoln, 2015	50.6	6	31.6646	46.8329
2015-05-25	2015	Lincoln, 2015	83.2	13	70.2412	89.8963
2015-05-25	2015	Lincoln, 2015	83.2	13	70.2412	82.436
2015-05-25	2015	Lincoln, 2015	50.6	6	31.6646	56.8819
2015-05-25	2015	Lincoln, 2015	83.2	13	70.2412	62.7607
2015-05-25	2015	Lincoln, 2015	83.2	13	70.2412	51.5955
2015-05-25	2015	Lincoln, 2015	50.6	6	31.6646	39.9684
2015-05-25	2015	Lincoln, 2015	83.2	13	70.2412	72.3809
2015-05-25	2015	Lincoln, 2015	83.2	13	70.2412	63.2896
2014-04-07	2014	Lincoln, 2014	37.8	14	56.1798	39.9847
2014-04-07	2014	Lincoln, 2014	37.8	14	56.1798	28.4438
2014-04-07	2014	Lincoln, 2014	37.8	14	56.1798	30.6289
2014-04-07	2014	Lincoln, 2014	37.8	14	56.1798	35.5648
2014-04-07	2014	Lincoln, 2014	37.8	14	56.1798	22.069
2014-04-07	2014	Lincoln, 2014	37.8	14	56.1798	15.2493
2014-04-07	2014	Lincoln, 2014	37.8	14	56.1798	18.6768
2014-04-07	2014	Lincoln, 2014	37.8	14	56.1798	45.9258
2014-04-07	2014	Lincoln, 2014	37.8	14	56.1798	17.6528
2014-04-07	2014	Lincoln, 2014	37.8	14	56.1798	11.6794
2014-04-21	2014	Lincoln, 2014	137.6	21	121.032	101.46
2014-04-21	2014	Lincoln, 2014	137.6	21	121.032	152.136
2014-04-21	2014	Lincoln, 2014	137.6	21	121.032	118.577
2014-04-21	2014	Lincoln, 2014	137.6	21	121.032	90.7973
2014-04-21	2014	Lincoln, 2014	137.6	21	121.032	128.061
2014-04-21	2014	Lincoln, 2014	137.6	21	121.032	189.989
2014-04-21	2014	Lincoln, 2014	137.6	21	121.032	168.394
2014-04-21	2014	Lincoln, 2014	137.6	21	121.032	168.157
2014-04-21	2014	Lincoln, 2014	137.6	21	121.032	142.53
2014-05-05	2014	Lincoln, 2014	159.8	13	100.192	74.4752
2014-05-05	2014	Lincoln, 2014	159.8	13	100.192	66.7788
2014-05-05	2014	Lincoln, 2014	159.8	13	100.192	79.9839
2014-05-05	2014	Lincoln, 2014	197.6	27	166.632	152.535
2014-05-05	2014	Lincoln, 2014	197.6	27	166.632	215.467
2014-05-05	2014	Lincoln, 2014	197.6	27	166.632	153.684
2014-05-05	2014	Lincoln, 2014	197.6	27	166.632	129.425
2014-05-05	2014	Lincoln, 2014	197.6	27	166.632	250.524
2014-05-05	2014	Lincoln, 2014	197.6	27	166.632	158.443
2014-05-19	2014	Lincoln, 2014	90.8	12	69.5228	41.5451
2014-05-19	2014	Lincoln, 2014	90.8	12	69.5228	50.7206
2014-05-19	2014	Lincoln, 2014	90.8	12	69.5228	55.7734
2014-05-19	2014	Lincoln, 2014	228.4	33	200.814	167.192
2014-05-19	2014	Lincoln, 2014	228.4	33	200.814	222.651
2014-05-19	2014	Lincoln, 2014	228.4	33	200.814	199.41
2014-06-03	2014	Lincoln, 2014	44.6	6	29.3186	43.1179
2014-06-03	2014	Lincoln, 2014	44.6	6	29.3186	36.6038
2014-06-03	2014	Lincoln, 2014	44.6	6	29.3186	30.2339
2014-06-03	2014	Lincoln, 2014	104.6	12	74.9186	38.1772
2014-06-03	2014	Lincoln, 2014	104.6	12	74.9186	22.4085
2014-06-03	2014	Lincoln, 2014	44.6	6	29.3186	12.926
2014-06-03	2014	Lincoln, 2014	44.6	6	29.3186	32.951
2014-06-03	2014	Lincoln, 2014	44.6	6	29.3186	24.8155
2014-06-03	2014	Lincoln, 2014	242.2	33	206.21	140.045
2014-06-03	2014	Lincoln, 2014	242.2	33	206.21	185.975
2014-06-03	2014	Lincoln, 2014	242.2	33	206.21	188.178
2015-11-02	2015	Lincoln, 2015	8.8	2	0.5608	0.6094
2015-11-02	2015	Lincoln, 2015	8.8	2	0.5608	0.6521
2015-11-02	2015	Lincoln, 2015	8.8	2	0.5608	1.2383
2015-11-02	2015	Lincoln, 2015	8.8	2	0.5608	0.8083
2015-11-02	2015	Lincoln, 2015	8.8	2	0.5608	1.0267
2015-11-02	2015	Lincoln, 2015	8.8	2	0.5608	0.376
2015-11-02	2015	Lincoln, 2015	8.8	2	0.5608	0.6821
2015-11-02	2015	Lincoln, 2015	8.8	2	0.5608	0.9602
2015-11-02	2015	Lincoln, 2015	8.8	2	0.5608	0.8353
2015-11-02	2015	Lincoln, 2015	8.8	2	0.5608	0.4987
2015-11-02	2015	Lincoln, 2015	8.8	2	0.5608	0.7503
2015-11-02	2015	Lincoln, 2015	8.8	2	0.5608	0.7252
2015-11-20	2015	Lincoln, 2015	22	5	16.792	2.8722
2015-11-20	2015	Lincoln, 2015	22	5	16.792	1.4389
2015-11-20	2015	Lincoln, 2015	22	5	16.792	1.7444
2015-11-20	2015	Lincoln, 2015	22	5	16.792	2.0591
2015-11-20	2015	Lincoln, 2015	22	5	16.792	1.8918
2015-11-20	2015	Lincoln, 2015	22	5	16.792	1.3455
2015-11-20	2015	Lincoln, 2015	22	5	16.792	2.6389
2015-11-20	2015	Lincoln, 2015	22	5	16.792	2.1048
2015-11-20	2015	Lincoln, 2015	22	5	16.792	1.6189
2015-11-20	2015	Lincoln, 2015	22	5	16.792	3.1262
2015-11-20	2015	Lincoln, 2015	22	5	16.792	1.9833
2015-11-20	2015	Lincoln, 2015	22	5	16.792	1.5155
2016-01-23	2016	Lincoln, 2016	21.6	5	16.6356	13.9289
2016-01-23	2016	Lincoln, 2016	21.6	5	16.6356	13.1276
2016-01-23	2016	Lincoln, 2016	21.6	5	16.6356	17.4941
2016-01-23	2016	Lincoln, 2016	21.6	5	16.6356	6.3875
2016-01-23	2016	Lincoln, 2016	21.6	5	16.6356	18.1087
2016-01-23	2016	Lincoln, 2016	21.6	5	16.6356	23.0288
2016-01-23	2016	Lincoln, 2016	21.6	5	16.6356	18.8103
2016-01-23	2016	Lincoln, 2016	21.6	5	16.6356	3.4332
2016-01-23	2016	Lincoln, 2016	21.6	5	16.6356	12.3364
2016-01-23	2016	Lincoln, 2016	21.6	5	16.6356	10.0476
2016-01-23	2016	Lincoln, 2016	21.6	5	16.6356	11.408
2016-01-23	2016	Lincoln, 2016	21.6	5	16.6356	18.0882
2016-02-07	2016	Lincoln, 2016	33.6	10	39.7776	26.67
2016-02-07	2016	Lincoln, 2016	33.6	10	39.7776	33.7425
2016-02-07	2016	Lincoln, 2016	33.6	10	39.7776	64.4481
2016-02-07	2016	Lincoln, 2016	33.6	10	39.7776	46.8549
2016-02-07	2016	Lincoln, 2016	33.6	10	39.7776	68.891
2016-02-07	2016	Lincoln, 2016	33.6	10	39.7776	40.8969
2016-02-07	2016	Lincoln, 2016	33.6	10	39.7776	45.2357
2016-02-07	2016	Lincoln, 2016	33.6	10	39.7776	56.7407
2016-02-07	2016	Lincoln, 2016	33.6	10	39.7776	68.396
2016-02-07	2016	Lincoln, 2016	33.6	10	39.7776	43.05
2016-02-07	2016	Lincoln, 2016	33.6	10	39.7776	47.786
2016-02-07	2016	Lincoln, 2016	33.6	10	39.7776	115.321
2016-04-09	2016	Lincoln, 2016	43.2	6	28.7712	24.6387
2016-04-09	2016	Lincoln, 2016	43.2	6	28.7712	23.1815
2016-04-09	2016	Lincoln, 2016	43.2	6	28.7712	16.4607
2016-04-09	2016	Lincoln, 2016	43.2	6	28.7712	12.4859
2016-04-09	2016	Lincoln, 2016	43.2	6	28.7712	19.7505
2016-04-09	2016	Lincoln, 2016	43.2	6	28.7712	22.5691
2016-04-09	2016	Lincoln, 2016	43.2	6	28.7712	17.5027
2016-04-09	2016	Lincoln, 2016	43.2	6	28.7712	14.5887
2016-04-09	2016	Lincoln, 2016	43.2	6	28.7712	25.5318
2016-04-09	2016	Lincoln, 2016	43.2	6	28.7712	20.3684
2016-04-09	2016	Lincoln, 2016	43.2	6	28.7712	35.949
2016-04-09	2016	Lincoln, 2016	43.2	6	28.7712	20.8452
2016-04-22	2016	Lincoln, 2016	65.8	8	44.9878	26.4696
2016-04-22	2016	Lincoln, 2016	65.8	8	44.9878	39.0885
2016-04-22	2016	Lincoln, 2016	65.8	8	44.9878	55.4527
2016-04-22	2016	Lincoln, 2016	65.8	8	44.9878	39.6775
2016-04-22	2016	Lincoln, 2016	65.8	8	44.9878	40.4877
2016-04-22	2016	Lincoln, 2016	65.8	8	44.9878	30.5504
2016-04-22	2016	Lincoln, 2016	65.8	8	44.9878	24.767
2016-04-22	2016	Lincoln, 2016	65.8	8	44.9878	33.3565
2016-04-22	2016	Lincoln, 2016	65.8	8	44.9878	54.3539
2016-04-22	2016	Lincoln, 2016	65.8	8	44.9878	73.0263
2016-04-22	2016	Lincoln, 2016	65.8	8	44.9878	55.3028
2016-04-22	2016	Lincoln, 2016	65.8	8	44.9878	33.3004
2016-05-10	2016	Lincoln, 2016	118	9	69.088	66.0576
2016-05-10	2016	Lincoln, 2016	118	9	69.088	39.8908
2016-05-10	2016	Lincoln, 2016	118	9	69.088	59.6056
2016-05-10	2016	Lincoln, 2016	118	9	69.088	39.536
2016-05-10	2016	Lincoln, 2016	118	9	69.088	58.9584
2016-05-10	2016	Lincoln, 2016	118	9	69.088	73.1522
2016-05-10	2016	Lincoln, 2016	118	9	69.088	70.0072
2016-05-10	2016	Lincoln, 2016	118	9	69.088	39.8666
2016-05-10	2016	Lincoln, 2016	118	9	69.088	51.215
2016-05-10	2016	Lincoln, 2016	118	9	69.088	88.5748
2016-05-10	2016	Lincoln, 2016	118	9	69.088	62.7414
2016-05-10	2016	Lincoln, 2016	118	9	69.088	42.9308
2016-05-25	2016	Lincoln, 2016	122.6	10	74.5766	34.334
2016-05-25	2016	Lincoln, 2016	122.6	10	74.5766	39.2144
2016-05-25	2016	Lincoln, 2016	122.6	10	74.5766	23.6957
2016-05-25	2016	Lincoln, 2016	122.6	10	74.5766	64.1606
2016-05-25	2016	Lincoln, 2016	122.6	10	74.5766	52.5495
2016-05-25	2016	Lincoln, 2016	122.6	10	74.5766	32.642
2016-05-25	2016	Lincoln, 2016	122.6	10	74.5766	32.7381
2016-05-25	2016	Lincoln, 2016	122.6	10	74.5766	29.7939
2016-05-25	2016	Lincoln, 2016	122.6	10	74.5766	61.356
2016-05-25	2016	Lincoln, 2016	122.6	10	74.5766	29.4292
2016-05-25	2016	Lincoln, 2016	122.6	10	74.5766	81.8734
2016-05-25	2016	Lincoln, 2016	122.6	10	74.5766	39.9925
2015-03-12	2015	Oamaru, 2015	55	10	48.145	83.16
2015-03-12	2015	Oamaru, 2015	55	10	48.145	70.63
2016-04-01	2016	Lincoln, 2016	33.8	5	21.4058	17.8688
2016-04-01	2016	Lincoln, 2016	33.8	5	21.4058	17.4011
2016-04-11	2016	Lincoln, 2016	38.6	5	23.2826	48.0802
2016-04-11	2016	Lincoln, 2016	38.6	5	23.2826	30.0735
2016-04-11	2016	Lincoln, 2016	38.6	5	23.2826	22.2884
2016-04-22	2016	Lincoln, 2016	42.6	7	32.2266	35.5827
2016-04-22	2016	Lincoln, 2016	42.6	7	32.2266	31.4608
2016-04-22	2016	Lincoln, 2016	42.6	7	32.2266	48.5549
1963-09-03	1963	Brookings, SD	260	2	98.78	80
1963-09-13	1963	Brookings, SD	263.9	2	100.305	103.3
1961-08-21	1961	Logan, UT	25.5	0	-0.2895	11.5
1961-08-21	1961	Logan, UT	25.5	0	-0.2895	8
1961-08-06	1961	Logan, UT	16.5	0	-3.8085	8.5
1961-08-06	1961	Logan, UT	16.5	0	-3.8085	5.5
1961-07-27	1961	Logan, UT	16.5	0	-3.8085	3.5
1961-07-27	1961	Logan, UT	16.5	0	-3.8085	5
1961-06-30	1961	Logan, UT	1.3	0	-9.7517	6
1961-06-30	1961	Logan, UT	1.3	0	-9.7517	6.5
1980-03-07	1980	Lincoln, 1980	74.6	4	33.6686	11.1111
1980-03-07	1980	Lincoln, 1980	74.6	4	33.6686	11.1111
1980-03-07	1980	Lincoln, 1980	74.6	4	33.6686	13.8889
1980-03-14	1980	Lincoln, 1980	107.4	6	53.8734	27.7778
1980-03-14	1980	Lincoln, 1980	107.4	6	53.8734	25
1980-03-14	1980	Lincoln, 1980	107.4	6	53.8734	30.5556
1980-03-21	1980	Lincoln, 1980	113.5	6	56.2585	83.3333
1980-03-21	1980	Lincoln, 1980	113.5	6	56.2585	61.1111
1980-03-21	1980	Lincoln, 1980	113.5	6	56.2585	100
1980-03-28	1980	Lincoln, 1980	125.2	6	60.8332	55.5556
1980-03-28	1980	Lincoln, 1980	125.2	6	60.8332	33.3333
1980-03-28	1980	Lincoln, 1980	125.2	6	60.8332	66.6667
1980-04-03	1980	Lincoln, 1980	143.4	6	67.9494	66.6667
1980-04-03	1980	Lincoln, 1980	143.4	6	67.9494	83.3333
1980-04-03	1980	Lincoln, 1980	143.4	6	67.9494	88.8889
1980-04-11	1980	Lincoln, 1980	163.4	8	83.1494	138.889
1980-04-11	1980	Lincoln, 1980	163.4	8	83.1494	116.667
1980-04-11	1980	Lincoln, 1980	163.4	8	83.1494	136.111
1980-04-17	1980	Lincoln, 1980	145.7	10	83.6087	127.778
1980-04-17	1980	Lincoln, 1980	145.7	10	83.6087	142
1980-03-28	1980	Lincoln, 1980	50.6	2	16.9046	8.3333
1980-03-28	1980	Lincoln, 1980	50.6	2	16.9046	8.3333
1980-03-28	1980	Lincoln, 1980	50.6	2	16.9046	13.8889
1980-04-03	1980	Lincoln, 1980	60.7	2	20.8537	19.4444
1980-04-03	1980	Lincoln, 1980	60.7	2	20.8537	19.4444
1980-04-03	1980	Lincoln, 1980	60.7	2	20.8537	19.4444
1980-04-11	1980	Lincoln, 1980	68.8	4	31.4008	55.5556
1980-04-11	1980	Lincoln, 1980	68.8	4	31.4008	50
1980-04-11	1980	Lincoln, 1980	68.8	4	31.4008	80.5556
1980-04-17	1980	Lincoln, 1980	71.1	6	39.6801	83.3333
1980-04-17	1980	Lincoln, 1980	71.1	6	39.6801	111.111
1980-04-17	1980	Lincoln, 1980	71.1	6	39.6801	133.333

## Sheet: Logan vs Hill weather
Day	Temperature	Dew Point Hill AFB	RH Hill	Temperature	Dew Point Logan	RH Logan
1999-06-01 09:00:00	20	6	40.1899	17	7	51.9705
1999-06-02 09:00:00	13	10	82.1676	15	7	59.0409
1999-06-03 09:00:00	16	7	55.3819	14	7	62.9672
1999-06-04 09:00:00	14	4	51.2074	10	7	81.8037
1999-06-05 09:00:00	6	3	81.2949	8	6	87.3395
1999-06-06 09:00:00	14	5	54.8932	14	9	72.0618
1999-06-07 09:00:00	14	7	62.9672	10	9	93.5765
1999-06-09 09:00:00	13	3	50.9479	11	5	66.7787
1999-06-11 09:00:00	18	8	52.2198	13	7	67.1822
1999-06-13 09:00:00	22	8	40.7229	18	9	55.8606
1999-06-14 09:00:00	22	8	40.7229	17	11	67.9609
1999-06-15 09:00:00	23	11	46.848	21	11	52.9533
1999-06-16 09:00:00	22	7	38.0382	21	12	56.5604
1999-06-17 09:00:00	23	5	31.1559	21	12	56.5604
1999-06-18 09:00:00	22	6	35.5096	19	12	64.02
1999-06-19 09:00:00	27	5	24.457	20	10	52.7112
1999-06-20 09:00:00	24	4	27.3259	21	12	56.5604
1999-06-21 09:00:00	25	6	29.5718	28	7	26.4738
1999-06-22 09:00:00	19	7	45.819	19	10	56.0963
1999-06-23 09:00:00	20	3	32.5897	19	8	49.0444
1999-06-24 09:00:00	22	4	30.8898	19	9	52.4667
1999-06-25 09:00:00	24	6	31.4203	20	9	49.298
1999-06-26 09:00:00	17	4	42.2418	16	6	51.7187
1999-06-27 09:00:00	21	7	40.4575	17	7	51.9705
1999-06-28 09:00:00	19	3	34.6969	15	3	44.7525
1999-06-29 09:00:00	21	2	28.5183	17	8	55.6225
1999-06-30 09:00:00	22	9	43.5721	19	11	59.9437
1999-07-01 09:00:00	23	7	35.7766	19	9	52.4667
1999-07-02 09:00:00	23	11	46.848	20	11	56.3295
1999-07-03 09:00:00	24	6	31.4203	18	6	45.5559
1999-07-04 09:00:00	27	4	22.7967	21	11	52.9533
1999-07-07 09:00:00	29	9	28.6055	30	11	30.8554
1999-07-08 09:00:00	22	9	43.5721	19	0	27.9826
1999-07-09 09:00:00	20	5	37.5004	17	-1	29.5348
1999-07-10 09:00:00	21	4	32.8604	17	3	39.3742
1999-07-11 09:00:00	23	4	29.048	20	8	46.0797
1999-07-12 09:00:00	23	4	29.048	21	8	43.3105
1999-07-13 09:00:00	24	7	33.6618	22	11	49.798
1999-07-14 09:00:00	23	11	46.848	24	12	47.0996
1999-07-15 09:00:00	21	13	60.3807	21	10	49.5492
1999-07-16 09:00:00	20	7	43.0467	17	8	55.6225
1999-07-17 09:00:00	22	9	43.5721	21	12	56.5604
1999-07-18 09:00:00	22	9	43.5721	19	13	68.3368
1999-07-19 09:00:00	26	7	29.8315	19	9	52.4667
1999-07-20 09:00:00	26	8	31.9445	23	13	53.4305
1999-07-21 09:00:00	27	5	24.457	26	11	39.0897
1999-07-22 09:00:00	27	8	30.0897	22	5	33.1293
1999-07-23 09:00:00	25	5	27.5845	21	4	32.8604
1999-07-24 09:00:00	29	6	23.2838	30	8	25.1981
1999-07-25 09:00:00	21	3	30.6221	19	7	45.819
1999-07-26 09:00:00	21	4	32.8604	19	7	45.819
1999-07-27 09:00:00	25	9	36.3052	23	10	43.8314
1999-07-28 09:00:00	25	11	41.5067	21	13	60.3807
1999-07-29 09:00:00	25	14	50.5309	26	14	47.5962
1999-07-30 09:00:00	24	12	47.0996	21	0	24.6868
1999-07-31 09:00:00	20	10	52.7112	19	12	64.02
1999-08-01 09:00:00	21	7	40.4575	20	9	49.298
1999-08-02 09:00:00	24	6	31.4203	21	10	49.5492
1999-08-03 09:00:00	25	7	31.6832	24	11	44.0886
1999-08-04 09:00:00	22	9	43.5721	20	13	64.2235
1999-08-05 09:00:00	23	9	40.9863	22	12	53.1931
1999-08-06 09:00:00	23	9	40.9863	22	14	60.5957
1999-08-07 09:00:00	25	10	38.8298	24	9	38.5679
1999-08-08 09:00:00	24	5	29.3106	21	8	43.3105
1999-08-09 09:00:00	25	7	31.6832	22	8	40.7229
1999-08-10 09:00:00	24	6	31.4203	21	7	40.4575
1999-08-11 09:00:00	20	11	56.3295	17	8	55.6225
1999-08-12 09:00:00	18	10	59.7216	14	11	82.2857
1999-08-13 09:00:00	22	5	33.1293	17	11	67.9609
1999-08-14 09:00:00	27	2	19.7694	22	8	40.7229
1999-08-15 09:00:00	20	5	37.5004	18	7	48.7884
1999-08-16 09:00:00	21	4	32.8604	17	4	42.2418
1999-08-17 09:00:00	21	5	35.2406	19	6	42.7807
1999-08-18 09:00:00	24	6	31.4203	19	7	45.819
1999-08-19 09:00:00	27	8	30.0897	21	8	43.3105
1999-08-20 09:00:00	25	9	36.3052	22	12	53.1931
1999-08-21 09:00:00	21	12	56.5604	21	13	60.3807
1999-08-22 09:00:00	22	10	46.5941	21	12	56.5604
1999-08-23 09:00:00	23	9	40.9863	21	8	43.3105
1999-08-24 09:00:00	22	7	38.0382	18	11	63.8141
1999-08-25 09:00:00	23	8	38.304	21	11	52.9533
1999-08-26 09:00:00	21	6	37.7703	19	-1	26.0129
1999-08-27 09:00:00	26	9	34.1873	22	8	40.7229
1999-08-29 09:00:00	22	8	40.7229	19	9	52.4667
1999-08-30 09:00:00	27	12	39.3477	19	9	52.4667
1999-08-31 09:00:00	13	6	62.7494	12	4	58.3375
2005-06-01 09:00:00	12	6	66.9816	12.2	6.7	69.3483
2005-06-02 09:00:00	12	1	47.2006	10.6	2.8	58.8236
2005-06-03 09:00:00	13	1	44.2046	10.6	2.8	58.8236
2005-06-04 09:00:00	15	3	44.7525	13.9	7.2	64.2426
2005-06-05 09:00:00	21	3	30.6221	13.9	7.2	64.2426
2005-06-06 09:00:00	6	6	100	6.1	4.4	88.9941
2005-06-07 09:00:00	4	4	100	3.9	2.8	92.6308
2005-06-08 09:00:00	10	2	57.8555	6.7	3.9	82.5249
2005-06-09 09:00:00	12	4	58.3375	7.8	5.6	86.1347
2005-06-10 09:00:00	13	2	47.4716	11.1	4.4	63.6413
2005-06-11 09:00:00	14	-5	26.6175	12.2	5	61.7152
2005-06-12 09:00:00	14	8	67.3803	13.3	8.3	71.9394
2005-06-13 09:00:00	14	-3	30.9281	12.2	-1.1	40.0261
2005-06-14 09:00:00	17	1	34.1455	13.9	6.7	62.0935
2005-06-15 09:00:00	23	6	33.3964	21.1	11.1	52.9774
2005-06-16 09:00:00	24	7	33.6618	19.4	11.1	58.8558
2005-06-17 09:00:00	24	0	20.5132	25	1.7	21.8303
2005-06-18 09:00:00	16	7	55.3819	12.8	4.4	56.9256
2005-06-19 09:00:00	23	4	29.048	16.1	7.2	55.7845
2005-06-20 09:00:00	24	6	31.4203	21.1	8.9	45.744
2005-06-21 09:00:00	24	6	31.4203	22.2	10	46.0267
2005-06-22 09:00:00	24	9	38.5679	21.1	12.2	56.9555
2005-06-23 09:00:00	22	10	46.5941	18.9	11.1	60.7184
2005-06-24 09:00:00	22	8	40.7229	19.4	10	54.7144
2005-06-25 09:00:00	23	5	31.1559	23.3	10	43.0381
2005-06-26 09:00:00	22	3	28.7839	18.9	9.4	54.2309
2005-06-27 09:00:00	21	5	35.2406	20	9.4	50.6393
2005-06-28 09:00:00	23	3	27.066	16.7	7.2	53.6957
2005-06-29 09:00:00	16	6	51.7187	16.7	6.7	51.8952
2005-06-30 09:00:00	18	6	45.5559	16.1	9.4	64.7016
2005-07-01 09:00:00	20	-3	21.0632	18.3	9.4	56.3072
2005-07-02 09:00:00	24	8	36.0418	21.1	8.3	43.9279
2005-07-03 09:00:00	20	1	28.2512	17.2	7.2	52.0206
2005-07-04 09:00:00	19	2	32.3173	16.7	6.7	51.8952
2005-07-05 09:00:00	22	4	30.8898	18.9	9.4	54.2309
2005-07-06 09:00:00	22	6	35.5096	20	8.9	48.9675
2005-07-07 09:00:00	24	6	31.4203	19.4	11.7	61.2283
2005-07-08 09:00:00	24	4	27.3259	21.1	10.6	51.2511
2005-07-09 09:00:00	25	5	27.5845	22.2	8.9	42.7519
2005-07-10 09:00:00	25	8	33.9254	21.1	11.7	55.116
2005-07-11 09:00:00	22	8	40.7229	20	11.1	56.703
2005-07-12 09:00:00	24	8	36.0418	21.1	10.6	51.2511
2005-07-13 09:00:00	26	9	34.1873	23.3	11.7	48.1794
2005-07-14 09:00:00	26	8	31.9445	23.3	9.4	41.3418
2005-07-15 09:00:00	24	6	31.4203	22.8	8.9	41.2109
2005-07-16 09:00:00	26	8	31.9445	26.1	11.7	40.7013
2005-07-17 09:00:00	23	5	31.1559	21.7	7.8	40.921
2005-07-18 09:00:00	20	2	30.3527	18.3	7.2	48.5337
2005-07-19 09:00:00	19	1	30.0817	20	8.3	47.0253
2005-07-20 09:00:00	26	7	29.8315	22.8	11.1	47.7375
2005-07-21 09:00:00	25	5	27.5845	22.8	7.8	38.251
2005-07-22 09:00:00	28	10	32.4621	26.1	15	50.4691
2005-07-23 09:00:00	25	13	47.349	21.1	17.8	81.5361
2005-07-24 09:00:00	24	11	44.0886	22.8	12.2	51.3273
2005-07-25 09:00:00	26	11	39.0897	23.9	13.3	51.5926
2005-07-26 09:00:00	20	0	26.2781	17.2	4.4	42.8909
2005-07-27 09:00:00	21	4	32.8604	17.8	4.4	41.2915
2005-07-28 09:00:00	22	2	26.8047	20.6	7.8	43.7969
2005-07-29 09:00:00	25	6	29.5718	23.9	8.3	37.0079
2005-08-01 09:00:00	21	11	52.9533	22.8	12.2	51.3273
2005-08-02 09:00:00	24	13	50.2889	21.7	14.4	63.3306
2005-08-03 09:00:00	22	12	53.1931	20.6	12.2	58.7374
2005-08-04 09:00:00	22	7	38.0382	21.1	7.8	42.4631
2005-08-05 09:00:00	24	7	33.6618	22.2	8.9	42.7519
2005-08-08 09:00:00	25	7	31.6832	22.8	8.9	41.2109
2005-08-09 09:00:00	24	13	50.2889	22.8	10	44.3693
2005-08-10 09:00:00	25	9	36.3052	22.8	13.3	55.1511
2005-08-11 09:00:00	24	8	36.0418	22.8	11.1	47.7375
2005-08-12 09:00:00	21	2	28.5183	19.4	5.6	40.5864
2005-08-15 09:00:00	22	4	30.8898	18.9	5	40.1714
2005-08-16 09:00:00	17	14	82.6308	18.3	14.4	78.1437
2005-08-17 09:00:00	18	10	59.7216	18.3	12.8	70.466
2005-08-18 09:00:00	23	7	35.7766	18.3	12.2	67.7619
2005-08-19 09:00:00	22	7	38.0382	18.3	8.9	54.4509
2005-08-22 09:00:00	24	6	31.4203	20	7.8	45.4585
2005-08-23 09:00:00	21	4	32.8604	18.3	9.4	56.3072
2005-08-24 09:00:00	24	6	31.4203	20	7.8	45.4585
2005-08-25 09:00:00	22	7	38.0382	18.3	5	41.7159
2005-08-26 09:00:00	21	3	30.6221	16.7	5	46.1624
2005-08-29 09:00:00	22	1	24.9456	17.8	4.4	41.2915
2005-08-30 09:00:00	17	-2	27.441	17.2	-3.9	23.5149
2005-08-31 09:00:00	13	-4	30.6449	12.2	1.1	46.9185
2006-06-01 09:00:00	17	0	31.767	15	4.4	49.364
2006-06-02 09:00:00	19	2	32.3173	16.1	6.1	51.744
2006-06-03 09:00:00	21	6	37.7703	20	6.7	42.1716
2006-06-04 09:00:00	21	7	40.4575	18.3	9.4	56.3072
2006-06-05 09:00:00	22	8	40.7229	19.4	8.9	50.8303
2006-06-06 09:00:00	22	5	33.1293	20	6.7	42.1716
2006-06-07 09:00:00	26	5	25.9692	22.8	10	44.3693
2006-06-08 09:00:00	22	7	38.0382	22.2	10	46.0267
2006-06-09 09:00:00	14	12	87.8576	13.9	11.7	86.7085
2006-06-10 09:00:00	17	8	55.6225	15.6	10	69.5182
2006-06-11 09:00:00	18	7	48.7884	17.8	7.2	50.0857
2006-06-12 09:00:00	23	3	27.066	20	7.2	43.6389
2006-06-13 09:00:00	25	-4	14.3298	22.8	5.6	32.8841
2006-06-14 09:00:00	13	9	76.8769	12.2	7.8	74.7164
2006-06-15 09:00:00	15	3	44.7525	13.3	7.8	69.556
2006-06-16 09:00:00	16	3	41.9689	15.6	3.9	45.8689
2006-06-20 09:00:00	20	-2	22.6905	18.3	5	41.7159
2006-06-21 09:00:00	19	2	32.3173	17.2	2.2	36.7338
2006-06-22 09:00:00	20	4	34.9697	16.7	1.1	35.0563
2006-06-23 09:00:00	19	1	30.0817	18.3	6.1	45.0119
2006-06-24 09:00:00	22	2	26.8047	19.4	7.8	47.1896
2006-06-25 09:00:00	22	4	30.8898	22.2	5	32.7239
2006-06-26 09:00:00	24	5	29.3106	21.7	8.3	42.3334
2006-06-27 09:00:00	22	5	33.1293	20	8.3	47.0253
2006-06-28 09:00:00	27	7	28.0977	21.7	6.1	36.4224
2006-06-29 09:00:00	25	8	33.9254	22.2	9.4	44.2142
2006-06-30 09:00:00	23	8	38.304	21.7	11.7	53.1214
2006-07-01 09:00:00	23	10	43.8314	22.2	9.4	44.2142
2006-07-02 09:00:00	25	10	38.8298	21.1	12.8	59.2336
2006-07-03 09:00:00	25	8	33.9254	24.4	10.6	41.9062
2006-07-04 09:00:00	25	8	33.9254	22.8	11.7	49.6673
2006-07-05 09:00:00	21	12	56.5604	20	13.3	65.4874
2006-07-06 09:00:00	23	12	50.0446	22.2	13.3	57.2051
2006-07-07 09:00:00	23	9	40.9863	21.7	11.1	51.0592
2006-07-08 09:00:00	22	8	40.7229	17.8	5.6	44.8793
2006-07-09 09:00:00	24	11	44.0886	22.2	7.8	39.6828
2006-07-10 09:00:00	21	8	43.3105	20.6	10.6	52.8568
2006-07-11 09:00:00	26	9	34.1873	23.9	8.9	38.5416
2006-07-12 09:00:00	26	12	41.7638	22.8	11.1	47.7375
2006-07-13 09:00:00	24	10	41.2475	21.7	9.4	45.5917
2006-07-14 09:00:00	24	7	33.6618	21.7	5	33.7477
2006-07-15 09:00:00	29	7	24.9522	22.8	6.7	35.4788
2006-07-16 09:00:00	26	10	36.5667	23.3	6.7	34.4111
2006-07-17 09:00:00	27	6	26.2221	25	5.6	28.7623
2006-07-18 09:00:00	27	8	30.0897	24.4	8.9	37.3915
2006-07-19 09:00:00	30	12	32.9735	25.6	11.7	41.9374
2006-07-20 09:00:00	25	15	53.8985	22.2	15.6	66.3378
2006-07-21 09:00:00	28	9	30.3464	25.6	15	51.9973
2006-07-22 09:00:00	28	8	28.3523	26.7	11.1	37.7398
2006-07-23 09:00:00	30	12	32.9735	25.6	12.8	45.0824
2006-07-24 09:00:00	29	15	42.5231	23.3	15.6	62.0508
2006-07-25 09:00:00	28	15	45.0962	23.9	13.9	53.6422
2006-07-26 09:00:00	31	14	35.471	23.9	12.2	48.0124
2006-07-27 09:00:00	25	8	33.9254	21.7	13.9	61.3199
2006-07-28 09:00:00	25	9	36.3052	22.8	10.6	46.1797
2006-07-29 09:00:00	29	12	34.9626	27.8	10	32.8489
2006-07-30 09:00:00	28	15	45.0962	25.6	15.6	54.0371
2006-07-31 09:00:00	22	7	38.0382	21.1	7.2	40.7618
2006-08-01 09:00:00	14	10	77.0254	13.3	12.8	96.8186
2006-08-02 09:00:00	18	11	63.8141	16.7	10	64.8248
2006-08-03 09:00:00	24	9	38.5679	17.2	11.1	67.5524
2006-08-04 09:00:00	22	11	49.798	20.6	10.6	52.8568
2006-08-05 09:00:00	25	7	31.6832	23.9	11.1	44.6515
2006-08-06 09:00:00	23	10	43.8314	23.3	10.6	44.795
2006-08-07 09:00:00	23	9	40.9863	21.1	8.3	43.9279
2006-08-09 09:00:00	24	3	25.4598	20.6	2.8	30.951
2006-08-11 09:00:00	28	6	24.7051	23.3	10	43.0381
2006-08-12 09:00:00	25	9	36.3052	20.6	6.1	38.9864
2006-08-13 09:00:00	21	6	37.7703	17.2	2.8	38.331
2006-08-14 09:00:00	21	7	40.4575	17.8	2.8	36.8994
2006-08-15 09:00:00	22	9	43.5721	22.8	10	44.3693
2006-08-16 09:00:00	26	8	31.9445	20.6	6.1	38.9864
2006-08-17 09:00:00	25	10	38.8298	20.6	5.6	37.6626
2006-08-18 09:00:00	19	2	32.3173	16.1	2.2	39.4048
2006-08-19 09:00:00	19	1	30.0817	17.8	0.6	31.5299
2006-08-20 09:00:00	21	1	26.5421	18.3	1.1	31.6673
2006-08-21 09:00:00	24	4	27.3259	20.6	5	36.1261
2006-08-22 09:00:00	27	5	24.457	23.3	2.2	25.1003
2006-08-23 09:00:00	28	8	28.3523	22.8	3.3	27.9892
2006-08-24 09:00:00	23	5	31.1559	18.9	3.3	35.6635
2006-08-25 09:00:00	22	10	46.5941	21.1	1.7	27.7394
2006-08-26 09:00:00	16	8	59.2703	14.4	8.3	67.0066
2006-08-27 09:00:00	16	4	45.0227	13.9	7.8	66.9073
2006-08-28 09:00:00	19	6	42.7807	18.3	7.8	50.5544
2006-08-29 09:00:00	22	5	33.1293	18	7	48.7884
2006-08-30 09:00:00	21	1	26.5421	23.3	3.3	27.1441
2006-08-31 09:00:00	15	0	36.1201	12.2	-2.8	35.3241
2007-06-01 09:00:00	19	1	30.0817	16.7	2.2	37.9224
2007-06-02 09:00:00	19.5	3.9	35.8274	17.8	3.3	38.2258
2007-06-03 09:00:00	20.8	5.7	37.4565	20	5.6	39.0945
2007-06-04 09:00:00	22.3	6.6	36.3325	19.4	6.7	43.7792
2007-06-05 09:00:00	26.3	-0.8	16.8193	21.7	8.3	42.3334
2007-06-06 09:00:00	5.2	4	92.0625	6.1	3.3	82.4512
2007-06-07 09:00:00	5.2	3.6	89.5421	3.9	1.7	85.7411
2007-06-08 09:00:00	11.8	3	55.1135	9.4	4.4	71.2376
2007-06-09 09:00:00	16.2	5.2	48.3215	12.8	4.4	56.9256
2007-06-10 09:00:00	19.6	4	35.8547	17.2	5.6	46.6156
2007-06-11 09:00:00	17.9	8.5	54.3543	16.1	8.3	60.0985
2007-06-12 09:00:00	20.1	6.7	41.91	17.2	7.2	52.0206
2007-06-13 09:00:00	19.1	4.4	38.046	17.2	4.4	42.8909
2007-06-14 09:00:00	20.6	5.4	37.1442	18.9	7.8	48.6876
2007-06-15 09:00:00	21.3	6	37.0759	19.4	8.3	48.8152
2007-06-16 09:00:00	24.9	8.6	35.5501	22.2	7.8	39.6828
2007-06-17 09:00:00	19.3	0.7	28.8874	18.3	-2.2	24.8892
2007-06-18 09:00:00	16.4	-1.9	28.7276	15.6	-2.2	29.5825
2007-06-19 09:00:00	19.3	2.4	32.6306	17.8	3.9	39.8723
2007-06-20 09:00:00	28.3	0.1	15.9347	22.8	5.6	32.8841
2007-06-21 09:00:00	23.8	2.4	24.6943	21.7	6.1	36.4224
2007-06-22 09:00:00	22.7	3.6	28.7652	21.1	6.7	39.3899
2007-06-23 09:00:00	26	4.3	24.7249	22.2	3.3	29.0417
2007-06-24 09:00:00	25.6	10	37.4541	21.1	3.9	32.4286
2007-06-25 09:00:00	21.3	2	27.9919	19.4	2.2	31.968
2007-06-26 09:00:00	20.4	2.4	30.4606	15.6	-1.1	32.0749
2007-06-27 09:00:00	23	4.6	30.2972	21.7	4.4	32.3626
2007-06-28 09:00:00	24	0.8	21.7421	21.7	5	33.7477
2007-06-29 09:00:00	24.6	1.1	21.4206	22.2	1.7	25.9126
2007-06-30 09:00:00	25.7	6.7	29.7537	22.2	4.4	31.3802
2007-07-01 09:00:00	24.5	3.5	25.5876	22.2	7.8	39.6828
2007-07-02 09:00:00	24.4	4	26.6687	22.2	4.4	31.3802
2007-07-03 09:00:00	24	3.1	25.6413	20.6	6.7	40.6285
2007-07-04 09:00:00	24.4	4.1	26.8572	22.2	5.6	34.1177
2007-07-05 09:00:00	28.3	7	26.0069	26.1	6.1	27.8674
2007-07-06 09:00:00	27.4	6.7	26.8741	25.6	8.9	34.7819
2007-07-07 09:00:00	28.3	7.7	27.2873	26.1	7.8	31.3232
2007-07-08 09:00:00	24.4	7	32.8545	21.1	9.4	47.3072
2007-07-09 09:00:00	25.1	6.6	30.6377	22.2	8.9	42.7519
2007-07-10 09:00:00	23.9	5.5	30.5347	22.2	5.6	34.1177
2007-07-11 09:00:00	25.5	5.5	27.7133	23.3	7.2	35.6119
2007-07-12 09:00:00	26.3	9.5	34.7302	27.2	10	34.04
2007-07-13 09:00:00	25.9	9.8	36.2963	24.4	10	40.2611
2007-07-14 09:00:00	27.9	8.1	28.7162	26.1	8.9	33.7541
2007-07-15 09:00:00	28.5	6.6	25.0011	26.1	8.3	32.4085
2007-07-16 09:00:00	27.4	8.4	30.1925	26.1	12.8	43.755
2007-07-17 09:00:00	23.4	11.7	47.8877	26.7	12.2	40.5873
2007-07-18 09:00:00	26.6	11	37.7139	23.9	11.7	46.4582
2007-07-19 09:00:00	30.2	6.5	22.4615	27.8	9.4	31.5494
2007-07-20 09:00:00	27.7	1.6	18.4192	24.4	4.4	27.4295
2007-07-21 09:00:00	28.4	5.4	23.138	25	7.2	32.121
2007-07-22 09:00:00	24.8	4.9	27.7262	21.7	2.2	27.6998
2007-07-23 09:00:00	27.8	8.5	29.6845	27.2	9.4	32.694
2007-07-24 09:00:00	26.7	13	42.7746	27.2	12.2	39.3991
2007-07-25 09:00:00	24.9	15.6	56.3487	23.3	17.8	71.3238
2007-07-26 09:00:00	22	15	64.6239	21.1	17.2	78.521
2007-07-27 09:00:00	23.9	13.9	53.6422	23.9	17.2	66.2396
2007-07-28 09:00:00	24	11.3	44.9737	21.7	13.9	61.3199
2007-07-29 09:00:00	24.9	9.4	37.5227	23.3	10	43.0381
2007-07-30 09:00:00	26.1	8.7	33.3002	25.6	9.4	35.9751
2007-07-31 09:00:00	28.7	9.8	30.7313	25.6	11.1	40.3042
2007-08-01 09:00:00	24.5	12.5	47.2245	23.9	12.8	49.9373
2007-08-02 09:00:00	21.3	16.8	75.6335	24.4	12.8	48.4523
2007-08-03 09:00:00	24.4	16.3	60.7157	23.3	16.7	66.5461
2007-08-04 09:00:00	23.9	13.2	51.2577	22.8	12.8	53.3832
2007-08-05 09:00:00	25.3	9.3	36.3838	23.3	12.8	51.7855
2007-08-06 09:00:00	26	6	27.8418	21.7	10	47.4598
2007-08-07 09:00:00	25.7	4.3	25.176	26.7	3.3	22.0879
2007-08-08 09:00:00	23.4	3.4	27.1701	20	4.4	35.9635
2007-08-09 09:00:00	23.8	2	23.9976	20	3.9	34.7251
2007-08-10 09:00:00	27.8	2.2	19.1176	28.9	1.1	16.538
2007-08-11 09:00:00	24.3	2.2	23.6122	20.6	3.9	33.4511
2007-08-12 09:00:00	29.4	3.8	19.4861	28.9	2.2	17.9056
2007-08-13 09:00:00	29.3	8.4	26.9824	25.6	12.8	45.0824
2007-08-14 09:00:00	28	9	30.3464	26.1	7.8	31.3232
2007-08-15 09:00:00	24.8	9.9	39.0383	21.7	12.2	54.8952
2007-08-16 09:00:00	26	9	34.1873	23.3	8.9	39.9732
2007-08-17 09:00:00	28	12	37.0841	22.2	16.1	68.484
2007-08-18 09:00:00	21.6	12.5	56.3284	23.9	12.2	48.0124
2007-08-19 09:00:00	24.8	10.1	39.5644	21.7	13.3	58.981
2007-08-20 09:00:00	20	3	32.5897	18.3	5	41.7159
2007-08-21 09:00:00	22.3	4.8	32.0726	21.7	6.7	37.958
2007-08-22 09:00:00	19.8	6.9	43.289	20	9.4	50.6393
2007-08-23 09:00:00	21	8.5	44.8019	16.1	7.2	55.7845
2007-08-24 09:00:00	19.4	1.3	29.9743	16.1	2.2	39.4048
2007-08-25 09:00:00	20	1	28.2512	17.2	2.2	36.7338
2007-08-26 09:00:00	25	7	31.6832	22.2	7.8	39.6828
2007-08-27 09:00:00	22	12	53.1931	24.4	10	40.2611
2007-08-29 09:00:00	21.6	5.4	34.9145	19.4	3.3	34.5616
2007-08-30 09:00:00	24.6	7.6	33.8201	21.7	6.1	36.4224
2007-08-31 09:00:00	26	10.2	37.0595	23.3	11.1	46.3066
2008-06-01 09:00:00	19	2.4	33.2514	15.6	6.1	53.4236
2008-06-02 09:00:00	18.5	8	50.6048	15	8.3	64.4736
2008-06-03 09:00:00	16.6	5.9	49.4375	13.9	7.2	64.2426
2008-06-04 09:00:00	8	7	93.4824	10.6	5.6	71.4572
2008-06-05 09:00:00	10.4	5.5	71.9134	11.1	5.6	69.1378
2008-06-06 09:00:00	14	5	54.8932	13.9	8.9	72.0444
2008-06-07 09:00:00	10	3.4	63.8448	12.2	-1.7	38.3076
2008-06-08 09:00:00	11.6	-2	38.9872	12.2	-1.7	38.3076
2008-06-09 09:00:00	15.3	1.7	40.0311	12.2	2.2	50.7384
2008-06-10 09:00:00	15	8	63.1825	11.1	7.8	80.3007
2008-06-11 09:00:00	7.2	-0.2	59.6934	5.6	1.1	73.077
2008-06-12 09:00:00	12.4	-0.1	42.4784	12.2	-0.6	41.5094
2008-06-13 09:00:00	15.9	0.4	35.0857	12.8	3.9	54.9775
2008-06-15 09:00:00	19.9	4.9	37.4733	18.3	6.7	46.9041
2008-06-16 09:00:00	19.9	6.3	41.2853	18.9	8.3	50.364
2008-06-17 09:00:00	22.2	5.1	32.9527	18.9	5.6	41.8774
2008-06-18 09:00:00	22.6	8.3	40.0594	20	8.3	47.0253
2008-06-19 09:00:00	20	4.4	35.9635	18.3	5.6	43.4865
2008-06-20 09:00:00	20	4	34.9697	18.3	4.4	40.0086
2008-06-21 09:00:00	21.7	2.8	28.9091	20.6	4.4	34.6447
2008-06-22 09:00:00	24.5	7.7	34.2585	23.3	7.8	37.1011
2008-06-23 09:00:00	24	9	38.5679	21.1	9.4	47.3072
2008-06-24 09:00:00	23.5	8	37.154	21.1	9.4	47.3072
2008-06-25 09:00:00	24.2	7.1	33.4843	20.6	8.3	45.3071
2008-06-26 09:00:00	25.8	0.8	19.4875	20	7.2	43.6389
2008-06-27 09:00:00	21.4	4.7	33.667	19.4	6.1	42.0115
2008-06-28 09:00:00	21.7	7.6	40.3677	21.7	9.4	45.5917
2008-06-29 09:00:00	24	7.1	33.8934	22.8	10	44.3693
2008-06-30 09:00:00	23	9	40.9863	22.8	10	44.3693
2008-07-01 09:00:00	27.3	8.2	29.9622	23.3	10.6	44.795
2008-07-02 09:00:00	24.3	9.8	39.9664	22.8	12.2	51.3273
2008-07-03 09:00:00	22.9	7.4	36.9949	22.2	7.2	38.0915
2008-07-04 09:00:00	25.7	6	28.3488	23.3	8.9	39.9732
2008-07-05 09:00:00	25	8.8	35.8179	22.8	8.3	39.5725
2008-07-06 09:00:00	22.9	8.5	39.8679	20.6	8.3	45.3071
2008-07-07 09:00:00	22.8	8.6	40.3844	20.6	8.3	45.3071
2008-07-08 09:00:00	21.4	6.2	37.3595	19.4	6.1	42.0115
2008-07-09 09:00:00	21.4	5.6	35.8421	21.1	7.8	42.4631
2008-07-10 09:00:00	22.3	3.7	29.6903	20.6	7.8	43.7969
2008-07-11 09:00:00	23	4	29.048	22.8	3.9	29.2003
2008-07-12 09:00:00	19	2	32.3173	17.8	0	30.1898
2008-07-13 09:00:00	21.2	4.8	34.325	19.4	2.2	31.968
2008-07-14 09:00:00	22.5	2.2	26.365	18.9	2.2	32.9883
2008-07-15 09:00:00	21.5	2.1	27.8453	20	4.4	35.9635
2008-07-16 09:00:00	24.4	9	37.6447	22.2	12.8	55.3722
2008-07-17 09:00:00	23.3	9.9	42.7512	22.8	8.3	39.5725
2008-07-18 09:00:00	24.5	7.8	34.4929	21.1	6.1	37.7972
2008-07-19 09:00:00	22	4.4	31.7691	20.6	5	36.1261
2008-07-20 09:00:00	29.6	6.8	23.7553	22.8	6.1	34.0422
2008-07-21 09:00:00	20.6	14.4	67.7545	25	12.8	46.734
2008-07-22 09:00:00	24.5	14.3	53.0925	21.1	16.1	73.2459
2008-07-23 09:00:00	24.2	14.5	54.7627	22.8	13.3	55.1511
2008-07-24 09:00:00	25.3	9.3	36.3838	21.7	8.9	44.0844
2008-07-25 09:00:00	25.3	5.5	28.0498	22.8	8.3	39.5725
2008-07-26 09:00:00	29.4	9.6	29.0965	25.6	3.9	24.6244
2008-07-27 09:00:00	26.5	9.9	35.2525	25.6	8.9	34.7819
2008-07-28 09:00:00	24.4	10.9	42.7506	23.9	11.7	46.4582
2008-07-29 09:00:00	24.3	5.1	28.9823	22.2	5.6	34.1177
2008-07-30 09:00:00	27.2	6.3	26.4551	25.6	7.2	30.9799
2008-07-31 09:00:00	22.9	5.6	32.6833	20.6	5.6	37.6626
2008-08-01 09:00:00	26.6	5.8	26.4869	25	6.7	31.0364
2008-08-02 09:00:00	25.4	5.7	28.2714	22.2	5	32.7239
2008-08-03 09:00:00	24.5	4.8	28.0385	21.7	5	33.7477
2008-08-04 09:00:00	24.5	3.5	25.5876	20.6	3.9	33.4511
2008-08-05 09:00:00	22.9	2.3	25.9086	21.1	4.4	33.5862
2008-08-06 09:00:00	21.5	8.7	44.0323	19.4	10	54.7144
2008-08-07 09:00:00	25.3	12.9	46.2013	25	11.7	43.4753
2008-08-08 09:00:00	26	14	47.5962	20	15	73.069
2008-08-09 09:00:00	23.9	12.3	48.3286	22.8	12.2	51.3273
2008-08-10 09:00:00	23.5	10.2	43.0898	22.2	11.1	49.5189
2008-08-11 09:00:00	21.1	2.5	29.3708	18.3	4.4	40.0086
2008-08-12 09:00:00	19.7	1.6	30.0555	17.8	3.3	38.2258
2008-08-13 09:00:00	22.1	3.5	29.6372	19.4	4.4	37.3375
2008-08-14 09:00:00	22	3	28.7839	20	3.9	34.7251
2008-08-15 09:00:00	20.8	5.4	36.686	21.1	5	35.0229
2008-08-16 09:00:00	19.3	4.1	36.7915	20	4.4	35.9635
2008-08-17 09:00:00	18.4	3.7	37.8549	17.8	6.7	48.4047
2008-08-18 09:00:00	21.6	4.9	33.7208	20.6	6.1	38.9864
2008-08-19 09:00:00	27.4	5.5	24.7282	22.8	7.2	36.7163
2008-08-20 09:00:00	22.8	3.7	28.7916	20	7.2	43.6389
2008-08-21 09:00:00	25.5	1.1	20.2809	21.1	6.1	37.7972
2008-08-22 09:00:00	19	4.7	39.0954	16.7	3.3	40.9915
2008-08-23 09:00:00	22.1	3.5	29.6372	18.9	2.8	34.4249
2008-08-24 09:00:00	24.3	5	28.7807	21.7	7.2	39.2807
2008-08-25 09:00:00	25.4	4.3	25.6361	21.7	8.3	42.3334
2008-08-26 09:00:00	21	5.9	37.5104	21.7	4.4	32.3626
2008-08-27 09:00:00	17.2	1.7	35.4476	12.8	-5.6	27.516
2008-08-28 09:00:00	19.5	0.8	28.7333	16.1	3.3	42.5921
2008-08-29 09:00:00	18.9	2.1	32.7541	17.8	2.2	35.3611
2008-08-30 09:00:00	20.5	1.3	27.98	17.8	2.8	36.8994
2008-08-31 09:00:00	24.3	9.7	39.6994	26.1	7.8	31.3232
2009-06-01 09:00:00	19	10	56.0963	17.8	10.6	62.9344
2009-06-02 09:00:00	19	11	59.9437	17.8	12.8	72.7082
2009-06-03 09:00:00	17	10	63.606	16.1	11.1	72.4227
2009-06-04 09:00:00	20	8	46.0797	19.4	8.3	48.8152
2009-06-05 09:00:00	20	7	43.0467	16.7	8.3	57.8503
2009-06-06 09:00:00	15	5	51.4643	13.9	7.2	64.2426
2009-06-07 09:00:00	9	8	93.5298	11.1	7.8	80.3007
2009-06-08 09:00:00	15	9	67.5761	13.9	7.2	64.2426
2009-06-09 09:00:00	16	11	72.4057	14.4	8.9	69.7609
2009-06-10 09:00:00	14	9	72.0618	11.7	10	89.425
2009-06-11 09:00:00	11	10	93.6226	10.6	8.9	89.343
2009-06-12 09:00:00	15	8	63.1825	15	8.9	67.1251
2009-06-13 09:00:00	13	9	76.8769	13.3	10.6	83.8483
2009-06-14 09:00:00	15	9	67.5761	14.4	10	75.0685
2009-06-15 09:00:00	16	8	59.2703	15	9.4	69.4071
2009-06-16 09:00:00	16.1	7.7	57.7106	14.4	8.3	67.0066
2009-06-17 09:00:00	13.7	11.4	86.1242	13.9	12.2	89.5851
2009-06-18 09:00:00	15	12	82.4022	15.6	10.6	72.3376
2009-06-19 09:00:00	16.6	6.9	52.9442	15	9.4	69.4071
2009-06-20 09:00:00	19	11.8	63.1858	15.6	10	69.5182
2009-06-21 09:00:00	15.1	7.3	59.8724	13.9	9.4	74.4913
2009-06-22 09:00:00	14	7.2	63.829	12.8	7.2	68.9924
2009-06-23 09:00:00	17.6	7.6	52.1204	13.3	5.6	59.8699
2009-06-24 09:00:00	20.2	9.3	49.6806	17.8	9.4	58.1042
2009-06-25 09:00:00	28	4	21.4753	20	8.3	47.0253
2009-06-26 09:00:00	17.1	12.3	73.5458	17.2	12.2	72.6081
2009-06-28 09:00:00	18.1	6.2	45.8969	16.1	7.2	55.7845
2009-06-29 09:00:00	19.5	7.1	44.7135	19.4	9.4	52.5648
2009-06-30 09:00:00	21.5	8	41.9949	20	8.9	48.9675
2009-07-01 09:00:00	23.1	11.5	48.1295	21.1	12.8	59.2336
2009-07-02 09:00:00	23.2	13	52.7853	22.2	11.7	51.5197
2009-07-03 09:00:00	20	14	68.5215	20.6	12.2	58.7374
2009-07-04 09:00:00	20	12	60.1633	18.3	11.7	65.5784
2009-07-05 09:00:00	21	12	56.5604	19.4	11.1	58.8558
2009-07-06 09:00:00	25	10	38.8298	21.7	12.2	54.8952
2009-07-07 09:00:00	21	10	49.5492	18.9	8.3	50.364
2009-07-08 09:00:00	23	10	43.8314	20	6.7	42.1716
2009-07-09 09:00:00	19	6	42.7807	17.2	4.4	42.8909
2009-07-10 09:00:00	20	6	40.1899	17.8	5.6	44.8793
2009-07-11 09:00:00	22	6	35.5096	18.9	8.3	50.364
2009-07-12 09:00:00	24	12	47.0996	22.2	10.6	47.9038
2009-07-13 09:00:00	23	13	53.4305	23.3	8.9	39.9732
2009-07-14 09:00:00	19	5	39.9202	18.3	3.3	37.0369
2009-07-15 09:00:00	20	6	40.1899	17.8	8.3	53.9648
2009-07-16 09:00:00	21	6	37.7703	20	6.7	42.1716
2009-07-17 09:00:00	23	6	33.3964	21.7	10	47.4598
2009-07-18 09:00:00	23	8	38.304	22.2	7.2	38.0915
2009-07-19 09:00:00	27	11	36.8263	27.8	11.7	36.7886
2009-07-20 09:00:00	25	9	36.3052	23.3	11.7	48.1794
2009-07-21 09:00:00	21	5	35.2406	19.4	3.9	36.0524
2009-07-22 09:00:00	23	8	38.304	22.2	8.9	42.7519
2009-07-23 09:00:00	24	9	38.5679	22.8	8.9	41.2109
2009-07-24 09:00:00	26	10	36.5667	22.8	10.6	46.1797
2009-07-25 09:00:00	24	14	53.6656	23.9	12.8	49.9373
2009-07-26 09:00:00	25	13	47.349	22.8	11.7	49.6673
2009-07-27 09:00:00	24	12	47.0996	22.8	11.1	47.7375
2009-07-28 09:00:00	23	11	46.848	19.4	8.9	50.8303
2009-07-29 09:00:00	23	11	46.848	18.3	9.4	56.3072
2009-07-30 09:00:00	21	8	43.3105	20.6	6.7	40.6285
2009-07-31 09:00:00	24	9	38.5679	22.8	9.4	42.6212
2009-08-01 09:00:00	21	7	40.4575	20	8.3	47.0253
2009-08-02 09:00:00	22	4	30.8898	20.6	8.3	45.3071
2009-08-03 09:00:00	28	3	20.0037	22.2	7.8	39.6828
2009-08-04 09:00:00	23	2	25.2033	21.7	5	33.7477
2009-08-05 09:00:00	24	4	27.3259	18.3	6.7	46.9041
2009-08-06 09:00:00	28	9	30.3464	26.7	10.6	36.5044
2009-08-07 09:00:00	17	7	51.9705	14.4	5.6	55.7551
2009-08-08 09:00:00	14	6	58.809	10	8.9	92.9545
2009-08-09 09:00:00	15	5	51.4643	13.3	7.2	66.7872
2009-08-10 09:00:00	18	5	42.5124	16.1	7.8	58.1027
2009-08-11 09:00:00	19	4	37.2285	17.2	5.6	46.6156
2009-08-12 09:00:00	22	3	28.7839	19.4	7.2	45.3017
2009-08-13 09:00:00	22	6	35.5096	20.6	6.1	38.9864
2009-08-14 09:00:00	25	10	38.8298	23.9	8.3	37.0079
2009-08-15 09:00:00	12	8	76.7264	11.7	7.2	74.131
2009-08-16 09:00:00	15	0	36.1201	12.2	2.2	50.7384
2009-08-17 09:00:00	16	2	39.0979	13.3	3.3	51.026
2009-08-18 09:00:00	16	3	41.9689	15	2.2	42.2904
2009-08-19 09:00:00	19	3	34.6969	16.1	5	47.9618
2009-08-20 09:00:00	20	5	37.5004	18.3	6.7	46.9041
2009-08-21 09:00:00	22	6	35.5096	20.6	7.8	43.7969
2009-08-22 09:00:00	24	6	31.4203	21.1	7.2	40.7618
2009-08-23 09:00:00	21	13	60.3807	22.2	12.2	53.2407
2009-08-24 09:00:00	17	13	77.46	16.1	13.3	83.604
2009-08-25 09:00:00	16	10	67.7697	16.7	10.6	67.4562
2009-08-26 09:00:00	20	9	49.298	16.7	10	64.8248
2009-08-27 09:00:00	20	7	43.0467	18.3	8.9	54.4509
2009-08-28 09:00:00	22	6	35.5096	20	6.7	42.1716
2009-08-29 09:00:00	20	4	34.9697	18.3	7.8	50.5544
2009-08-30 09:00:00	23	6	33.3964	20	11.1	56.703
2009-08-31 09:00:00	21	8	43.3105	18.3	6.7	46.9041
2010-06-01 09:00:00	11	10	93.6226	11.1	8.9	86.4511
2010-06-02 09:00:00	17	10	63.606	16.1	8.9	62.5724
2010-06-03 09:00:00	18	9	55.8606	15	11.1	77.6817
2010-06-04 09:00:00	19	11	59.9437	13.9	12.8	93.147
2010-06-05 09:00:00	18.3	10.5	60.5872	17.2	10	62.8074
2010-06-06 09:00:00	20.6	11.6	56.4683	16.7	10.6	67.4562
2010-06-07 09:00:00	20	11.4	57.8366	16.1	10.6	70.0723
2010-06-08 09:00:00	17.3	8.1	54.9471	14.4	9.4	72.1313
2010-06-09 09:00:00	17	10	63.606	14.4	10.6	78.1099
2010-06-10 09:00:00	16.1	11.3	73.382	18.3	9.4	56.3072
2010-06-11 09:00:00	10.1	3.5	63.8667	9.4	4.4	71.2376
2010-06-12 09:00:00	10	5	71.3479	13.3	5	57.4425
2010-06-13 09:00:00	11.5	7.8	78.2186	10.6	7.2	79.6933
2010-06-14 09:00:00	14.6	8.3	66.1503	15	7.8	62.3345
2010-06-15 09:00:00	17.9	6.3	46.7995	16.7	8.3	57.8503
2010-06-16 09:00:00	23.1	4.2	29.2794	15.6	10.6	72.3376
2010-06-17 09:00:00	11.4	-1.2	41.89	11.1	0	46.6171
2010-06-18 09:00:00	16	1	36.4003	11.7	2.2	52.4337
2010-06-19 09:00:00	20.9	4.7	34.7258	17.2	7.2	52.0206
2010-06-20 09:00:00	23.6	-2.7	17.2204	17.8	6.7	48.4047
2010-06-21 09:00:00	17.2	7.3	52.3759	15	5	51.4643
2010-06-22 09:00:00	19.3	5.1	39.4499	15	6.7	57.8457
2010-06-23 09:00:00	19.7	4.6	37.1589	16.1	3.9	44.4239
2010-06-24 09:00:00	21.9	9	43.8403	20	8.9	48.9675
2010-06-25 09:00:00	23.3	6.4	33.7078	20.6	8.3	45.3071
2010-06-26 09:00:00	21.2	10.5	50.5992	20	8.9	48.9675
2010-06-27 09:00:00	20.1	6.7	41.91	18.9	6.1	43.3472
2010-06-28 09:00:00	21	8	43.3105	19.4	6.7	43.7792
2010-06-29 09:00:00	26.4	7.6	30.3476	21.7	11.1	51.0592
2010-06-30 09:00:00	26.2	8.9	33.5525	25	12.8	46.734
2010-07-01 09:00:00	27.1	7.9	29.7074	26.1	10	36.3484
2010-07-02 09:00:00	28	2	18.6211	27.8	3.3	20.6807
2010-07-03 09:00:00	16.9	5.1	45.8963	16.1	5	47.9618
2010-07-04 09:00:00	16.6	5.4	47.7617	16.1	4.4	46.0027
2010-07-05 09:00:00	19.1	2.7	33.7546	19.4	3.9	36.0524
2010-07-06 09:00:00	19.4	5.5	40.3065	16.1	4.4	46.0027
2010-07-07 09:00:00	19.1	6	42.5135	17.8	3.9	39.8723
2010-07-08 09:00:00	21.9	7.6	39.8741	22.2	6.7	36.8083
2010-07-09 09:00:00	22.3	7.3	38.1181	21.7	8.3	42.3334
2010-07-10 09:00:00	23.3	10	43.0381	20.6	10	50.7883
2010-07-11 09:00:00	24.4	9.4	38.6729	21.1	9.4	47.3072
2010-07-12 09:00:00	26.2	9.1	34.0091	24.4	9.4	38.6729
2010-07-13 09:00:00	24.9	7.7	33.4399	23.3	9.4	41.3418
2010-07-14 09:00:00	20.4	3.9	33.87	18.9	1.7	31.8316
2010-07-15 09:00:00	22	5	33.1293	18.9	2.2	32.9883
2010-07-16 09:00:00	21.7	4.1	31.6888	20.6	6.1	38.9864
2010-07-17 09:00:00	26	10.6	38.0628	27.8	9.4	31.5494
2010-07-18 09:00:00	26.4	11	38.1665	23.9	10	41.4982
2010-07-19 09:00:00	26	9.9	36.3224	24.4	8.9	37.3915
2010-07-20 09:00:00	23.4	4.3	28.9494	20	2.8	32.1311
2010-07-21 09:00:00	29.9	11.8	32.7307	20	9.4	50.6393
2010-07-22 09:00:00	25.4	7.8	32.6689	23.3	11.7	48.1794
2010-07-23 09:00:00	23.5	6.1	32.6166	21.1	7.2	40.7618
2010-07-24 09:00:00	22.5	6.3	35.1557	20	2.8	32.1311
2010-07-25 09:00:00	23.7	4.9	29.6436	21.1	5.6	36.5132
2010-07-26 09:00:00	25.7	4.4	25.3536	21.7	5.6	35.1845
2010-07-27 09:00:00	23.7	12.7	50.2158	22.8	12.8	53.3832
2010-07-28 09:00:00	25.4	13.2	46.8337	23.3	12.2	49.7903
2010-07-29 09:00:00	25.1	14.6	52.2146	22.2	12.8	55.3722
2010-07-30 09:00:00	25.1	11.9	43.7886	21.7	12.2	54.8952
2010-07-31 09:00:00	26.6	12.9	42.7493	23.9	11.7	46.4582
2010-08-01 09:00:00	23.5	14.7	57.8678	22.2	14.4	61.4254
2010-08-02 09:00:00	25.8	13.9	47.8565	21.7	8.3	42.3334
2010-08-03 09:00:00	28.3	10.5	32.9776	21.7	10.6	49.3945
2010-08-04 09:00:00	24.1	9.1	38.5942	23.9	8.9	38.5416
2010-08-05 09:00:00	24	10	41.2475	23.9	8.9	38.5416
2010-08-06 09:00:00	26.6	8.6	32.1004	24.4	11.7	45.0754
2010-08-08 09:00:00	23.5	9.4	40.8419	20.6	10.6	52.8568
2010-08-09 09:00:00	23	9	40.9863	23.9	7.8	35.7709
2010-08-10 09:00:00	21.9	3.3	29.5841	18.9	9.4	54.2309
2010-08-11 09:00:00	27	-0.6	16.3632	28.3	-1.7	13.9519
2010-08-12 09:00:00	20.6	5.2	36.632	18.3	5.6	43.4865
2010-08-13 09:00:00	19.1	3.1	34.7243	15.6	4.4	47.4983
2010-08-14 09:00:00	21.3	5.8	36.567	16.7	5.6	48.119
2010-08-15 09:00:00	22.1	4.4	31.574	17.8	4.4	41.2915
2010-08-16 09:00:00	22.6	3.7	29.1475	19.4	7.8	47.1896
2010-08-17 09:00:00	23.3	4.2	28.9231	20	5.6	39.0945
2010-08-18 09:00:00	29.4	10.8	31.5355	26.1	5.6	26.9168
2010-08-19 09:00:00	18.7	13.5	71.9209	18.3	11.1	63.0396
2010-08-20 09:00:00	18.9	9	52.7957	18.3	9.4	56.3072
2010-08-21 09:00:00	28.2	8.9	29.7867	24.4	8.3	35.903
2010-08-22 09:00:00	28.2	11.6	35.6921	23.3	6.1	33.0171
2010-08-23 09:00:00	17	5	45.2905	13.3	9.4	77.4361
2010-08-24 09:00:00	16.7	2.2	37.9224	13.3	2.8	49.2624
2010-08-25 09:00:00	20.5	5.3	37.1172	16.7	5	46.1624
2010-08-26 09:00:00	20.7	0.7	26.463	17.8	3.3	38.2258
2010-08-27 09:00:00	27.3	8.8	31.2086	25.6	10	37.4541
2010-08-28 09:00:00	24.8	12.4	46.0759	20	13.3	65.4874
2010-08-29 09:00:00	18.3	5.9	44.3962	13.9	8.3	69.2011
2010-08-30 09:00:00	10.8	6.3	73.9807	11.1	6.7	74.5365
2010-08-31 09:00:00	15.3	3.7	46.1105	10	6.1	76.9435
2011-06-01 09:00:00	20.9	-4.4	17.9152	15.6	7.2	57.5934
2011-06-02 09:00:00	9.9	3.7	65.6315	8.9	2.8	65.8803
2011-06-03 09:00:00	9.4	0.1	52.583	8.9	2.8	65.8803
2011-06-04 09:00:00	16.4	-1	30.6909	12.2	1.7	48.9696
2011-06-05 09:00:00	19.7	3.6	34.6434	16.7	6.1	49.8045
2011-06-06 09:00:00	23.7	0.7	21.985	17.2	7.8	54.1844
2011-06-07 09:00:00	15.2	4.9	50.4562	14.4	6.1	57.7042
2011-06-08 09:00:00	14.1	6.9	62.1376	13.3	8.9	74.8937
2011-06-09 09:00:00	13.7	8.3	70.1009	8.3	7.2	92.8672
2011-06-10 09:00:00	14	2.8	47.0717	11.1	5.6	69.1378
2011-06-11 09:00:00	18.1	7.2	49.1481	15	8.9	67.1251
2011-06-12 09:00:00	16.1	9.5	65.135	14.4	9.4	72.1313
2011-06-13 09:00:00	18.6	7.5	48.6107	15.6	9.4	66.7955
2011-06-14 09:00:00	17.7	4.2	40.977	16.7	8.9	60.2329
2011-06-15 09:00:00	19.1	7.1	45.8451	15	7.8	62.3345
2011-06-16 09:00:00	15.2	4.2	48.0587	13.3	2.2	47.2167
2011-06-17 09:00:00	13.4	0	40.0748	10.6	2.8	58.8236
2011-06-18 09:00:00	16	2.2	39.658	13.3	5.6	59.8699
2011-06-19 09:00:00	10.7	9.6	92.9899	11	9	87.604
2011-06-20 09:00:00	15.3	9	66.291	14.4	7.8	64.7846
2011-06-21 09:00:00	17.1	6.8	50.942	16.1	9.4	64.7016
2011-06-22 09:00:00	18.7	6.3	44.5024	17.8	11.1	65.0484
2011-06-23 09:00:00	22.9	9.6	42.9343	20	11.1	56.703
2011-06-24 09:00:00	22.1	12.1	53.2169	19.4	11.1	58.8558
2011-06-25 09:00:00	20.4	9.5	49.7308	17.2	8.3	56.0474
2011-06-26 09:00:00	20.3	7.8	44.6192	18.9	6.7	45.1703
2011-06-27 09:00:00	19.7	6.3	41.8033	16.7	4.4	44.2757
2011-06-28 09:00:00	25.3	6.6	30.2701	21.1	10	49.2446
2011-06-29 09:00:00	25.5	5.5	27.7133	30	3.3	18.1518
2011-06-30 09:00:00	21.4	8.7	44.3043	18.9	9.4	54.2309
2011-07-01 09:00:00	19.2	9	51.8155	19.4	8.9	50.8303
2011-07-02 09:00:00	22	10.1	46.9062	18.9	7.8	48.6876
2011-07-03 09:00:00	26.3	8.3	32.0225	21.7	10.6	49.3945
2011-07-04 09:00:00	24.5	10.2	40.5574	20.6	13.9	65.6053
2011-07-05 09:00:00	20.5	13.4	63.9088	21.1	14.4	65.7029
2011-07-06 09:00:00	22.9	14.4	58.8632	21.1	12.2	56.9555
2011-07-07 09:00:00	24	12	47.0996	20.6	13.9	65.6053
2011-07-08 09:00:00	19.1	15.6	80.2739	20.6	13.9	65.6053
2011-07-09 09:00:00	22.1	12.7	55.349	18.9	11.7	63.165
2011-07-10 09:00:00	22	13	56.7889	20	13.3	65.4874
2011-07-11 09:00:00	21.9	12.4	54.9419	20.6	10.6	52.8568
2011-07-12 09:00:00	22	13.1	57.1599	23.3	11.1	46.3066
2011-07-13 09:00:00	23.2	11.5	47.8377	26.1	9.4	34.9125
2011-07-14 09:00:00	24.9	4.4	26.6098	26.1	2.8	22.0991
2011-07-15 09:00:00	22.1	4.7	32.2437	18.9	7.8	48.6876
2011-07-17 09:00:00	23	5.9	33.1662	20	6.7	42.1716
2011-07-18 09:00:00	26.2	12.7	43.2107	25	15	53.8985
2011-07-19 09:00:00	28	13.3	40.3883	24.4	13.9	52.0486
2011-07-20 09:00:00	21	9.7	48.566	18.3	10	58.6077
2011-07-21 09:00:00	22.7	10.3	45.5436	18.9	8.9	52.4422
2011-07-22 09:00:00	26.2	-0.7	17.0464	19.4	8.3	48.8152
2011-07-23 09:00:00	22.2	7.3	38.3528	19.4	8.9	50.8303
2011-07-24 09:00:00	22.7	9.3	42.5952	20	7.8	45.4585
2011-07-25 09:00:00	24.5	6.7	31.9896	20.6	8.9	47.1794
2011-07-26 09:00:00	25.4	13.7	48.3829	24.4	12.8	48.4523
2011-07-27 09:00:00	23.7	11.8	47.3353	21.1	11.7	55.116
2011-07-28 09:00:00	23.5	11	45.4453	20.6	8.3	45.3071
2011-07-29 09:00:00	22.5	8.7	41.4109	21.1	9.4	47.3072
2011-07-30 09:00:00	22	8	40.7229	22.2	9.4	44.2142
2011-07-31 09:00:00	25.1	13.3	47.9956	20	16.1	78.3743
2011-08-01 09:00:00	18.8	18	95.1422	18.3	17.2	93.352
2011-08-02 09:00:00	20.6	13.7	64.7624	18.9	13.3	70.1158
2011-08-03 09:00:00	21.7	13.7	60.5314	21.7	13.3	58.981
2011-08-04 09:00:00	22.5	11.8	50.9183	20	12.2	60.9569
2011-08-05 09:00:00	23.1	9.8	42.9862	19.4	12.2	63.2689
2011-08-06 09:00:00	20.9	6.5	39.3364	18.9	11.7	63.165
2011-08-07 09:00:00	22.2	1.8	26.0991	19.4	8.9	50.8303
2011-08-08 09:00:00	22.1	4.7	32.2437	20	9.4	50.6393
2011-08-09 09:00:00	26	4	24.2078	18.3	10	58.6077
2011-08-10 09:00:00	19.7	4	35.6311	18.3	8.3	52.2942
2011-08-11 09:00:00	22.6	7	36.663	19.4	7.8	47.1896
2011-08-12 09:00:00	21.2	4.5	33.6132	18.3	6.1	45.0119
2011-08-13 09:00:00	22.6	4	29.7699	19.4	6.7	43.7792
2011-08-14 09:00:00	24.4	11	43.0353	25	9.4	37.2972
2011-08-15 09:00:00	21.3	12.9	58.8928	21.7	10.6	49.3945
2011-08-16 09:00:00	20.5	8.5	46.2091	16.1	7.2	55.7845
2011-08-17 09:00:00	21.3	8.9	45.1833	18.9	5.6	41.8774
2011-08-18 09:00:00	22	2.9	28.5804	19.4	7.2	45.3017
2011-08-19 09:00:00	23.5	8.7	38.9598	18.3	6.7	46.9041
2011-08-20 09:00:00	24.4	9.8	39.7255	25	10	38.8298
2011-08-21 09:00:00	22.5	9.6	43.9961	22.2	10	46.0267
2011-08-22 09:00:00	25.5	7.9	32.695	21.7	7.8	40.921
2011-08-23 09:00:00	23.5	6.6	33.7609	21.1	7.8	42.4631
2011-08-24 09:00:00	23.5	6.5	33.5293	21.7	7.8	40.921
2011-08-25 09:00:00	28	8.7	29.7357	23.3	12.8	51.7855
2011-08-26 09:00:00	27.5	10	33.4386	24.4	10.6	41.9062
2011-08-27 09:00:00	25.9	10.7	38.5473	25.6	10	37.4541
2011-08-28 09:00:00	24.2	14.4	54.4106	22.2	14.4	61.4254
2011-08-29 09:00:00	21.5	14.6	64.9409	20	13.3	65.4874
2011-08-30 09:00:00	23	11	46.848	20.6	10	50.7883
2011-08-31 09:00:00	27.8	7.4	27.5367	27.8	5.6	24.3147
2012-06-01 09:00:00	22	6	35.5096	18.9	8.9	52.4422
2012-06-02 09:00:00	22	6.9	37.7784	17.2	12.8	75.5029
2012-06-03 09:00:00	23.2	9.9	43.0122	20	10	52.7112
2012-06-04 09:00:00	24	5.2	29.7224	20	8.9	48.9675
2012-06-05 09:00:00	19.2	6.6	44.0272	15.6	4.4	47.4983
2012-06-06 09:00:00	9.7	0.8	54.1932	10	-0.6	48.0252
2012-06-07 09:00:00	14	-0.7	36.63	11.1	1.7	52.6508
2012-06-08 09:00:00	20.6	0.1	25.495	15	1.7	40.8125
2012-06-09 09:00:00	16.5	4.1	43.914	15	5.6	53.6424
2012-06-10 09:00:00	11.8	-2.5	37.0833	11.1	-2.8	37.9918
2012-06-11 09:00:00	15	0.8	38.2659	13.3	2.2	47.2167
2012-06-12 09:00:00	18	-0.4	28.9544	14.4	0.6	39.2121
2012-06-13 09:00:00	22.1	0	23.0572	18.3	4.4	40.0086
2012-06-14 09:00:00	20.2	1.6	29.1297	16.7	0	32.3816
2012-06-15 09:00:00	20.3	3.7	33.6056	17.8	4.4	41.2915
2012-06-16 09:00:00	21.1	3.3	31.0856	17.8	5	43.0527
2012-06-17 09:00:00	22.2	2.7	27.8316	20	2.8	32.1311
2012-06-18 09:00:00	24.7	3.7	25.6387	23.3	1.1	23.1925
2012-06-19 09:00:00	16.7	-3.4	25.2085	15	-2.8	29.4155
2012-06-20 09:00:00	15.3	-5.7	23.1888	13.3	-2.2	34.3514
2012-06-21 09:00:00	19.2	0.7	29.0697	17.2	2.2	36.7338
2012-06-22 09:00:00	28.5	-1.8	13.6838	24.4	5	28.6064
2012-06-23 09:00:00	27.3	-5.6	11.0251	28.3	-1.7	13.9519
2012-06-24 09:00:00	29	-4.7	10.6673	26.7	5	24.9003
2012-06-25 09:00:00	29.5	2.6	17.7835	23.3	6.7	34.4111
2012-06-26 09:00:00	28.3	-3	12.6576	28.3	-4.4	11.3824
2012-06-27 09:00:00	19.7	2.3	31.5968	16.7	0	32.3816
2012-06-28 09:00:00	25.4	3.1	23.5509	20	2.2	30.789
2012-06-29 09:00:00	26	4.7	25.4294	21.7	3.9	31.2465
2012-06-30 09:00:00	24.5	2.4	23.6624	21.1	5	35.0229
2012-07-01 09:00:00	26.2	1	19.3	22.2	2.8	28.0301
2012-07-02 09:00:00	24.6	9.3	37.952	22.2	8.3	41.0531
2012-07-03 09:00:00	29.6	0.1	14.749	27.2	9.4	32.694
2012-07-04 09:00:00	23.5	6.5	33.5293	20.6	5.6	37.6626
2012-07-05 09:00:00	23.1	10.8	45.95	22.2	10.6	47.9038
2012-07-06 09:00:00	20.2	14.4	69.4465	17.2	13.9	81.0731
2012-07-07 09:00:00	25	10.3	39.6165	23.9	11.1	44.6515
2012-07-08 09:00:00	24.5	9.7	39.2223	23.9	10.6	43.1931
2012-07-09 09:00:00	25.8	6.9	29.9853	24.4	8.9	37.3915
2012-07-10 09:00:00	26.1	7.4	30.4781	25	9.4	37.2972
2012-07-11 09:00:00	27.8	5.8	24.6556	24.4	8.3	35.903
2012-07-12 09:00:00	27.3	8.1	29.7587	24.4	8.9	37.3915
2012-07-13 09:00:00	25.4	7.8	32.6689	26.1	12.2	42.0654
2012-07-14 09:00:00	24.4	12.4	47.1996	21.7	16.1	70.6049
2012-07-15 09:00:00	21.8	13.4	59.0031	22.8	13.3	55.1511
2012-07-16 09:00:00	23.7	10.4	43.1415	21.1	13.3	61.1925
2012-07-17 09:00:00	21.5	11.7	53.7773	20	11.7	58.9899
2012-07-18 09:00:00	24.2	7	33.2555	22.8	8.3	39.5725
2012-07-19 09:00:00	23.9	6.5	32.7225	22.8	5.6	32.8841
2012-07-20 09:00:00	25.6	7.9	32.4989	25.6	9.4	35.9751
2012-07-21 09:00:00	26.1	11.1	39.1156	25.6	11.1	40.3042
2012-07-22 09:00:00	25.5	10.2	38.1873	23.9	13.3	51.5926
2012-07-23 09:00:00	24.5	12.4	46.9159	25.6	10.6	38.986
2012-07-24 09:00:00	20.4	14.1	67.2821	23.3	13.3	53.5013
2012-07-25 09:00:00	24.4	11.6	44.7789	22.8	11.7	49.6673
2012-07-26 09:00:00	23.4	5.6	31.6992	22.8	9.4	42.6212
2012-07-27 09:00:00	25.5	9.1	35.4674	28.9	7.8	26.5173
2012-07-28 09:00:00	28.5	8.8	29.0652	26.7	7.2	29.0018
2012-07-29 09:00:00	26.5	8.3	31.6416	25	8.9	36.0608
2012-07-30 09:00:00	25.6	8.9	34.7819	22.8	3.3	27.9892
2012-07-31 09:00:00	25.5	10.5	38.96	25	8.3	34.6245
2012-08-01 09:00:00	25.6	11.1	40.3042	26.7	9.4	33.6826
2012-08-02 09:00:00	25.8	7.3	30.8202	22.8	3.3	27.9892
2012-08-03 09:00:00	23.7	2.1	24.3184	21.1	4.4	33.5862
2012-08-04 09:00:00	22.7	3	27.5693	20.6	2.2	29.6576
2012-08-05 09:00:00	25.1	3.5	24.6728	21.1	5.6	36.5132
2012-08-06 09:00:00	26.3	12.7	42.9537	26.1	11.7	40.7013
2012-08-07 09:00:00	21.9	1.3	25.6493	18.9	4.4	38.5266
2012-08-08 09:00:00	24.3	3	24.9986	22.8	5.6	32.8841
2012-08-09 09:00:00	26.9	8.7	31.7452	26.7	10.6	36.5044
2012-08-10 09:00:00	23.9	7.8	35.7709	23.9	10.6	43.1931
2012-08-11 09:00:00	22.8	13.2	54.7935	18.9	15	78.2257
2012-08-12 09:00:00	22.2	5.8	34.5937	20	8.9	48.9675
2012-08-13 09:00:00	25.7	8.7	34.1089	22.8	10.6	46.1797
2012-08-14 09:00:00	23.7	9.7	41.1694	21.1	11.7	55.116
2012-08-15 09:00:00	22.6	5.2	32.3773	20	9.4	50.6393
2012-08-16 09:00:00	25	6	29.5718	21.7	8.3	42.3334
2012-08-17 09:00:00	23.6	4.8	29.6173	21.1	6.7	39.3899
2012-08-18 09:00:00	22.2	2.5	27.4381	19.4	3.9	36.0524
2012-08-19 09:00:00	22.9	0.3	22.4309	20	7.2	43.6389
2012-08-20 09:00:00	24.4	12.7	48.1364	21.1	8.9	45.744
2012-08-21 09:00:00	20.6	3.7	32.9838	18.9	7.8	48.6876
2012-08-22 09:00:00	23.6	10.8	44.5748	22.2	10.6	47.9038
2012-08-23 09:00:00	22.6	9.8	44.3177	20	9.4	50.6393
2012-08-24 09:00:00	22.5	7.9	39.2256	20.6	9.4	48.791
2012-08-25 09:00:00	20	1.7	29.7084	16.1	-3.9	25.236
2012-08-26 09:00:00	24.6	8.1	34.9924	22.2	7.2	38.0915
2012-08-27 09:00:00	23	8	38.304	20.6	8.9	47.1794
2012-08-28 09:00:00	25.2	9	35.8703	23.3	7.8	37.1011
2012-08-29 09:00:00	28.3	9.1	30.0147	27.8	8.9	30.5011
2012-08-30 09:00:00	22	4	30.8898	20	2.8	32.1311
2012-08-31 09:00:00	20.7	10.3	51.4943	20	10.6	54.8569
2013-06-01 09:00:00	14	0.2	39.0997	12.2	2.2	50.7384
2013-06-02 09:00:00	18.5	3.7	37.6172	15	5	51.4643
2013-06-03 09:00:00	16.3	-3.1	26.4506	15.6	1.1	37.6165
2013-06-04 09:00:00	16.9	0.8	33.8731	15.6	5	49.5203
2013-06-05 09:00:00	17.5	4.4	42.0829	15	3.3	45.7076
2013-06-06 09:00:00	19.1	5.7	41.6425	17.2	7.2	52.0206
2013-06-07 09:00:00	21.2	6.2	37.824	18.9	8.3	50.364
2013-06-08 09:00:00	22.1	4.6	32.0191	22.2	5	32.7239
2013-06-09 09:00:00	22.1	5	32.9259	20.6	7.2	42.0429
2013-06-10 09:00:00	26.2	8.1	31.7795	25	9.4	37.2972
2013-06-11 09:00:00	24.2	-4.2	14.823	25.6	1.7	21.0506
2013-06-12 09:00:00	22	5	33.1293	21.7	7.8	40.921
2013-06-13 09:00:00	25.7	5.7	27.7648	21.7	8.9	44.0844
2013-06-14 09:00:00	14	0.8	40.826	13.9	-1.1	35.8093
2013-06-15 09:00:00	16.6	-0.8	30.7464	13.3	0	40.3373
2013-06-16 09:00:00	20.3	1.6	28.9484	18.3	2.8	35.7513
2013-06-17 09:00:00	20	0	26.2781	19.4	1.1	29.5463
2013-06-18 09:00:00	21.8	1.2	25.6233	20	5	37.5004
2013-06-19 09:00:00	21.5	2.1	27.8453	19.4	3.3	34.5616
2013-06-20 09:00:00	13.8	0.5	40.4777	12.8	1.7	47.0815
2013-06-21 09:00:00	16.3	2.7	40.3078	15	1.1	39.0988
2013-06-22 09:00:00	17.2	4.1	42.0015	15	1.7	40.8125
2013-06-23 09:00:00	17.9	0.3	30.6583	15.6	2.2	40.6887
2013-06-24 09:00:00	25.8	-1.6	16.3406	21.1	4.4	33.5862
2013-06-25 09:00:00	19.5	7.1	44.7135	18.3	12.2	67.7619
2013-06-26 09:00:00	23.1	11	46.5637	21.1	8.9	45.744
2013-06-27 09:00:00	25.8	9.8	36.5145	22.2	11.1	49.5189
2013-06-28 09:00:00	26.1	8.3	32.4085	23.9	10.6	43.1931
2013-06-29 09:00:00	26.2	7.6	30.7134	22.8	10.6	46.1797
2013-06-30 09:00:00	28	9.3	30.9681	26.7	10.6	36.5044
2013-07-01 09:00:00	27.2	7.1	27.956	26.7	7.8	30.2181
2013-07-02 09:00:00	26.8	7.7	29.8336	25.6	11.1	40.3042
2013-07-03 09:00:00	27	9.2	32.6422	25.6	10.6	38.986
2013-07-04 09:00:00	23.8	14.6	56.4631	23.9	13.3	51.5926
2013-07-06 09:00:00	23.9	12.3	48.3286	21.1	12.2	56.9555
2013-07-07 09:00:00	23.8	12.8	50.2402	20.6	12.2	58.7374
2013-07-08 09:00:00	23.6	12.7	50.5209	23.3	12.8	51.7855
2013-07-09 09:00:00	23.7	8	36.7047	23.9	10	41.4982
2013-07-10 09:00:00	24.3	6.1	31.067	23.9	7.2	34.3344
2013-07-11 09:00:00	23.9	4.2	27.8826	20.6	6.7	40.6285
2013-07-12 09:00:00	21	11.5	54.7309	20	11.7	58.9899
2013-07-13 09:00:00	19	16.1	83.3806	20	12	60.1633
2013-07-14 09:00:00	23.4	13.1	52.4898	21.7	11.7	53.1214
2013-07-15 09:00:00	26.5	9.1	33.4044	21.7	8.9	44.0844
2013-07-16 09:00:00	25.3	13.9	49.3095	23.9	13.3	51.5926
2013-07-17 09:00:00	23.8	15.1	58.3071	25	13.9	50.2045
2013-07-18 09:00:00	24.4	13.6	51.0454	24.4	14.4	53.759
2013-07-19 09:00:00	25.4	7.8	32.6689	23.3	3.9	28.3191
2013-07-20 09:00:00	23.9	5.1	29.6961	22.8	6.7	35.4788
2013-07-21 09:00:00	25.5	4	24.949	23.9	5	29.4897
2013-07-22 09:00:00	25.5	4.9	26.577	22.2	2.2	26.8571
2013-07-23 09:00:00	26	3	22.5518	22.2	1.7	25.9126
2013-07-24 09:00:00	24.3	2	23.2763	21.1	2.2	28.7495
2013-07-25 09:00:00	25	9.7	38.0568	22.8	7.2	36.7163
2013-07-26 09:00:00	24.6	5.7	29.6729	22.2	7.8	39.6828
2013-07-27 09:00:00	24.3	14.3	53.7357	22.2	10.6	47.9038
2013-07-28 09:00:00	22.1	13.3	57.5556	20	13.3	65.4874
2013-07-29 09:00:00	22.5	12	51.5925	19.4	11.7	61.2283
2013-07-30 09:00:00	25	8.3	34.6245	23.9	8.3	37.0079
2013-07-31 09:00:00	26.5	7.2	29.3509	23.3	8.9	39.9732
2013-08-01 09:00:00	28.3	7.4	26.732	28.9	7.2	25.4479
2013-08-02 09:00:00	23.2	3	26.7361	20	2.2	30.789
2013-08-03 09:00:00	25.1	5.5	28.3908	20	2.2	30.789
2013-08-04 09:00:00	25.9	2.7	22.2083	21.1	1.1	26.5684
2013-08-05 09:00:00	25.9	5.6	27.2424	21.7	2.8	28.9091
2013-08-06 09:00:00	25.4	4	25.1002	22.2	3.9	30.2976
2013-08-07 09:00:00	24.7	3.7	25.6387	20.6	3.9	33.4511
2013-08-08 09:00:00	23.3	6	32.7896	25	6.7	31.0364
2013-08-09 09:00:00	22	4.9	32.8991	21.1	8.3	43.9279
2013-08-10 09:00:00	24.4	4.1	26.8572	20	6.1	40.4679
2013-08-11 09:00:00	25.6	5.3	27.1656	23.9	7.2	34.3344
2013-08-12 09:00:00	25	5	27.5845	23.3	5.6	31.8934
2013-08-13 09:00:00	22.5	5.5	33.263	20.6	5.6	37.6626
2013-08-14 09:00:00	23.5	3.4	27.0044	20.6	4.4	34.6447
2013-08-15 09:00:00	22.5	0.6	23.497	20.6	1.1	27.4086
2013-08-16 09:00:00	23.7	-1.1	19.2742	19.4	2.2	31.968
2013-08-17 09:00:00	25.7	4.1	24.824	23.3	4.4	29.332
2013-08-18 09:00:00	23.4	8.6	38.9334	22.2	8.3	41.0531
2013-08-19 09:00:00	25.2	7.4	32.1734	22.8	8.3	39.5725
2013-08-20 09:00:00	24.6	10.3	40.5834	23.3	10	43.0381
2013-08-21 09:00:00	23.9	11	44.3564	22.8	13.3	55.1511
2013-08-22 09:00:00	22.5	8.9	41.9736	20	13.3	65.4874
2013-08-23 09:00:00	22	10.6	48.4941	23.9	10	41.4982
2013-08-24 09:00:00	20.9	11.6	55.433	18.9	12.8	67.8751
2013-08-25 09:00:00	22.1	10.5	47.8786	20	10.6	54.8569
2013-08-26 09:00:00	22	11	49.798	23.9	10.6	43.1931
2013-08-27 09:00:00	22.9	12.5	52.0288	20.6	11.7	56.8411
2013-08-28 09:00:00	22.3	13	55.7577	21.7	12.8	57.092
2013-08-29 09:00:00	24.8	10.9	41.7315	23.3	9.4	41.3418
2013-08-30 09:00:00	24.7	10.4	40.6093	22.8	10	44.3693
2013-08-31 09:00:00	24.5	9.4	38.4398	20.6	9.4	48.791
2014-06-01 09:00:00	17.7	-0.5	29.297	16.7	2.2	37.9224
2014-06-02 09:00:00	17.3	0.5	32.3139	16.1	4.4	46.0027
2014-06-03 09:00:00	22.5	3.3	28.5101	19.4	6.1	42.0115
2014-06-04 09:00:00	19.6	4.4	36.8732	16.1	6.1	51.744
2014-06-05 09:00:00	19.2	1	29.7055	15.6	1.1	37.6165
2014-06-06 09:00:00	18.5	-0.5	27.8478	16.7	1.7	36.5952
2014-06-07 09:00:00	20.1	2.6	31.4809	17.2	1.1	33.9564
2014-06-08 09:00:00	18.3	5	41.7159	16.7	5	46.1624
2014-06-09 09:00:00	18.4	3.3	36.804	17.2	2.8	38.331
2014-06-10 09:00:00	20.9	3.8	32.6033	17.2	4.4	42.8909
2014-06-11 09:00:00	20.2	1.3	28.5091	18.9	0	28.1596
2014-06-12 09:00:00	19.9	1.5	29.4693	17.8	3.3	38.2258
2014-06-13 09:00:00	21.6	-0.2	23.4386	22.2	-1.7	20.2254
2014-06-14 09:00:00	13.3	0.5	41.8185	12.8	0.6	43.5198
2014-06-15 09:00:00	14.9	1.3	39.9198	14.4	2.2	43.9615
2014-06-16 09:00:00	16.6	3.4	41.5449	19.4	2.2	31.968
2014-06-17 09:00:00	8.1	7.1	93.4872	10	6.1	76.9435
2014-06-18 09:00:00	9.6	4.3	69.8086	11.1	1.7	52.6508
2014-06-19 09:00:00	14.7	4	48.9426	11.7	5.6	66.463
2014-06-20 09:00:00	17.6	4.1	40.9498	14.4	5.6	55.7551
2014-06-21 09:00:00	21.9	7.3	39.0663	20	7.2	43.6389
2014-06-22 09:00:00	19.4	4.3	37.0773	16.1	8.9	62.5724
2014-06-23 09:00:00	21.2	6.3	38.0855	18.9	7.8	48.6876
2014-06-24 09:00:00	21.2	5.7	36.5401	19.4	5	38.9323
2014-06-25 09:00:00	22.7	7.8	38.4857	22.2	7.8	39.6828
2014-06-26 09:00:00	23.3	8.6	39.1712	21.1	11.7	55.116
2014-06-27 09:00:00	13.5	10.9	84.424	15.6	10	69.5182
2014-06-28 09:00:00	19.1	8.4	50.0752	16.7	10	64.8248
2014-06-29 09:00:00	19.9	8	46.3671	18.3	8.9	54.4509
2014-06-30 09:00:00	20.3	2	29.7892	18.3	3.9	38.6329
2014-07-01 09:00:00	21	2.2	28.9286	18.3	5	41.7159
2014-07-02 09:00:00	22.3	3.9	30.1116	22.8	4.4	30.2442
2014-07-03 09:00:00	23.4	6.6	33.9674	21.7	11.7	53.1214
2014-07-04 09:00:00	24.9	9	36.5248	22.8	10	44.3693
2014-07-05 09:00:00	28.4	9	29.6365	25.6	9.4	35.9751
2014-07-06 09:00:00	24.5	7.6	34.0254	22.8	8.3	39.5725
2014-07-07 09:00:00	25.2	6.5	30.2441	22.2	7.8	39.6828
2014-07-08 09:00:00	26.1	9.3	34.6781	24.4	9.4	38.6729
2014-07-09 09:00:00	25.1	9.5	37.3234	24.4	11.1	43.3217
2014-07-10 09:00:00	25.2	13.5	48.3338	24.4	13.3	50.0591
2014-07-11 09:00:00	21.6	15.1	66.6487	21.7	16.1	70.6049
2014-07-14 09:00:00	27.1	9.5	33.1115	26.7	10	35.0687
2014-07-15 09:00:00	27.4	10.2	34.0917	25	11.1	41.7831
2014-07-16 09:00:00	25.6	10.3	38.2133	22.2	8.3	41.0531
2014-07-17 09:00:00	22.8	6.4	34.754	21.1	8.3	43.9279
2014-07-18 09:00:00	26.1	7	29.6529	22.8	10	44.3693
2014-07-19 09:00:00	25.3	6.8	30.6899	23.3	8.9	39.9732
2014-07-20 09:00:00	23.6	5.6	31.3148	20.6	8.3	45.3071
2014-07-21 09:00:00	26.6	4.7	24.529	25.6	11.7	41.9374
2014-07-22 09:00:00	23.8	6	31.8051	21.1	10	49.2446
2014-07-23 09:00:00	27.3	4.1	22.5498	23.9	8.9	38.5416
2014-07-25 09:00:00	23.6	7.1	34.7281	18.9	3.9	37.2012
2014-07-26 09:00:00	25.6	6.3	29.1185	21.1	5.6	36.5132
2014-07-27 09:00:00	24	3.1	25.6413	22.2	4.4	31.3802
2014-07-28 09:00:00	27.4	7.7	28.7851	23.9	8.3	37.0079
2014-07-29 09:00:00	18	15	82.7428	18.3	16.1	87.0939
2014-07-30 09:00:00	17.9	16	88.7331	18.3	16.1	87.0939
2014-07-31 09:00:00	21.2	11.3	53.3527	20	11.1	56.703
2014-08-01 09:00:00	22.2	11.2	49.8475	20	11.1	56.703
2014-08-02 09:00:00	23.4	8.5	38.6708	22.8	11.1	47.7375
2014-08-03 09:00:00	23.5	9	39.7569	21.1	8.9	45.744
2014-08-04 09:00:00	20.3	14.1	67.6985	21.1	14.4	65.7029
2014-08-05 09:00:00	21.6	13.5	60.1189	20	15	73.069
2014-08-06 09:00:00	21.6	13	58.1967	17.2	15.6	90.3894
2014-08-07 09:00:00	20.3	10.1	52.086	17.8	13.3	75.1062
2014-08-08 09:00:00	22	12	53.1931	18.9	12.8	67.8751
2014-08-09 09:00:00	21	10	49.5492	19.4	11.7	61.2283
2014-08-10 09:00:00	22	9	43.5721	20	10.6	54.8569
2014-08-11 09:00:00	22	9	43.5721	21.7	10	47.4598
2014-08-12 09:00:00	22	10	46.5941	23.3	11.7	48.1794
2014-08-13 09:00:00	20	13	64.2235	19.4	13.9	70.659
2014-08-14 09:00:00	23	15	60.8085	21.1	14.4	65.7029
2014-08-15 09:00:00	23.7	12.1	48.279	21.1	12.2	56.9555
2014-08-16 09:00:00	22.6	7.2	37.1686	20.6	10	50.7883
2014-08-17 09:00:00	22.1	4.4	31.574	20.6	6.7	40.6285
2014-08-18 09:00:00	23.2	5	30.7769	20	8.9	48.9675
2014-08-19 09:00:00	20	12	60.1633	23.9	8.9	38.5416
2014-08-20 09:00:00	19.4	12	62.4456	20.6	12.2	58.7374
2014-08-21 09:00:00	18	12	68.1499	16.7	12.8	77.9221
2014-08-22 09:00:00	19.2	9.5	53.5818	16.7	12.2	74.9358
2014-08-23 09:00:00	15	9.1	68.0299	12.2	11.1	93.0644
2014-08-24 09:00:00	16	6	51.7187	13.9	8.3	69.2011
2014-08-25 09:00:00	18	8	52.2198	16.1	10	67.3401
2014-08-26 09:00:00	18.9	10.6	58.7434	17.8	11.1	65.0484
2014-08-27 09:00:00	17.4	10.6	64.539	15	12.2	83.4847
2014-08-28 09:00:00	18.5	10	57.8778	17.2	12.2	72.6081
2014-08-29 09:00:00	18.5	7.5	48.9167	17.8	11.1	65.0484
2014-08-30 09:00:00	20.1	7.3	43.6653	19.4	12.2	63.2689
2014-08-31 09:00:00	17.9	6.6	47.7723	17.2	8.9	58.3567
2015-06-01 09:00:00	24.8	2.7	23.7376	18.9	11.7	63.165
2015-06-02 09:00:00	19.5	8.6	49.5043	15	8.3	64.4736
2015-06-03 09:00:00	18.7	6.4	44.8091	15.6	9.4	66.7955
2015-06-04 09:00:00	18.3	6.8	47.2261	15	7.8	62.3345
2015-06-05 09:00:00	17.4	4.6	42.9449	15	10.6	75.1629
2015-06-06 09:00:00	18.1	7.3	49.484	15.6	8.9	64.5983
2015-06-07 09:00:00	16.3	8.5	60.1434	16.1	10.6	70.0723
2015-06-08 09:00:00	19.1	10	55.7473	18.3	12.2	67.7619
2015-06-09 09:00:00	21.1	8.9	45.744	20	10.6	54.8569
2015-06-10 09:00:00	20	9.3	50.301	20.6	11.7	56.8411
2015-06-11 09:00:00	20.1	12.3	60.9784	17.8	13.3	75.1062
2015-06-12 09:00:00	19.8	12.1	61.3143	19.4	12.2	63.2689
2015-06-13 09:00:00	21.2	9	45.7698	17.8	7.8	52.1702
2015-06-14 09:00:00	22	8.3	41.56	18.9	5.6	41.8774
2015-06-15 09:00:00	23.3	10.1	43.3266	22.8	8.3	39.5725
2015-06-16 09:00:00	21.9	13.4	58.6432	21.7	12.2	54.8952
2015-06-17 09:00:00	21.7	9.8	46.8298	20.6	9.4	48.791
2015-06-18 09:00:00	23.5	8.8	39.2239	21.1	8.3	43.9279
2015-06-19 09:00:00	25.1	6.5	30.4272	22.8	7.8	38.251
2015-06-20 09:00:00	22	7.2	38.5624	20	7.2	43.6389
2015-06-21 09:00:00	23.5	6.2	32.8427	19.4	6.7	43.7792
2015-06-22 09:00:00	22.6	5.9	33.9888	20	5.6	39.0945
2015-06-23 09:00:00	22.2	5.4	33.6474	20	5.6	39.0945
2015-06-24 09:00:00	24.6	6.1	30.5069	20.6	7.2	42.0429
2015-06-25 09:00:00	23.9	7.4	34.8076	22.2	6.7	36.8083
2015-06-26 09:00:00	24.9	8.2	34.5983	23.3	8.9	39.9732
2015-06-27 09:00:00	25	9	36.3052	23.3	10.6	44.795
2015-06-28 09:00:00	25.5	9	35.2288	24.4	11.1	43.3217
2015-06-29 09:00:00	27.7	9.9	32.8232	28.9	8.3	27.4382
2015-06-30 09:00:00	27	12	39.3477	26.1	13.9	47.0073
2015-07-01 09:00:00	25.8	12.4	43.3932	26.7	12.2	40.5873
2015-07-02 09:00:00	26.7	11.1	37.7398	24.4	11.1	43.3217
2015-07-03 09:00:00	26.3	9.2	34.0352	24.4	7.8	34.7024
2015-07-04 09:00:00	26.4	10.8	37.6621	26.7	11.7	39.2705
2015-07-05 09:00:00	21.6	18	80.0781	19.4	15.6	78.7937
2015-07-06 09:00:00	24.4	14.4	53.759	22.2	13.3	57.2051
2015-07-07 09:00:00	23.6	12.5	49.8639	21.7	13.3	58.981
2015-07-08 09:00:00	19	12	64.02	18.3	12.8	70.466
2015-07-09 09:00:00	19.1	12.6	66.1671	18.3	11.7	65.5784
2015-07-10 09:00:00	21.2	8.7	44.8539	18.9	11.1	60.7184
2015-07-11 09:00:00	21.2	9.3	46.702	20.6	9.4	48.791
2015-07-12 09:00:00	24.2	3.7	26.43	21.1	8.9	45.744
2015-07-13 09:00:00	23.8	4.8	29.2582	20	6.7	42.1716
2015-07-14 09:00:00	22.6	7.1	36.915	20	9.4	50.6393
2015-07-15 09:00:00	22.1	11.4	50.8205	20	9.4	50.6393
2015-07-16 09:00:00	24	9.3	39.3553	20	9.4	50.6393
2015-07-17 09:00:00	21.8	10.1	47.4852	21.7	8.3	42.3334
2015-07-18 09:00:00	20.5	6.7	40.8814	13.3	10.6	83.8483
2015-07-19 09:00:00	21.4	6.7	38.6667	15.6	8.9	64.5983
2015-07-20 09:00:00	13.4	13	97.4495	15	11.1	77.6817
2015-07-21 09:00:00	21.5	9.8	47.409	18.3	9.4	56.3072
2015-07-22 09:00:00	22.5	10.3	46.1033	21.7	10	47.4598
2015-07-23 09:00:00	21.6	12.5	56.3284	20.6	13.3	63.1051
2015-07-24 09:00:00	24.3	8.5	36.6143	19.4	10.6	56.9406
2015-07-25 09:00:00	23	8.1	38.5651	21.1	9.4	47.3072
2015-07-26 09:00:00	24.7	4.6	27.315	21.1	6.7	39.3899
2015-07-29 09:00:00	17.8	1.2	32.9217	15	3.3	45.7076
2015-07-30 09:00:00	20.8	1.8	28.465	18.3	1.7	33.0594
2015-07-31 09:00:00	22	1.9	26.6135	19.4	1.1	29.5463
2015-08-01 09:00:00	22.1	3	28.6068	21.1	5	35.0229
2015-08-02 09:00:00	24.6	4.2	26.7202	21.7	3.9	31.2465
2015-08-03 09:00:00	16	15.8	98.7412	18.3	13.9	75.6694
2015-08-04 09:00:00	19.4	12.8	65.796	17.2	13.3	77.9918
2015-08-05 09:00:00	25.9	7.1	30.2181	21.7	9.4	45.5917
2015-08-06 09:00:00	19.7	9.4	51.5922	15.6	10.6	72.3376
2015-08-07 09:00:00	21.5	11	51.3491	21.1	9.4	47.3072
2015-08-08 09:00:00	17.8	14.4	80.6268	17.2	12.2	72.6081
2015-08-09 09:00:00	18.3	10.3	59.7885	16.7	11.1	69.72
2015-08-10 09:00:00	20.5	7.1	42.0164	19.4	8.9	50.8303
2015-08-11 09:00:00	22.6	9.6	43.728	22.2	8.9	42.7519
2015-08-12 09:00:00	24.5	15.1	55.899	22.2	14.4	61.4254
2015-08-13 09:00:00	22.9	14	57.3625	23.3	12.8	51.7855
2015-08-14 09:00:00	25	14	50.5309	23.3	13.3	53.5013
2015-08-15 09:00:00	24.7	14.9	54.5261	23.3	12.8	51.7855
2015-08-16 09:00:00	23.3	11.4	47.2349	20	5	37.5004
2015-08-17 09:00:00	20.6	3.1	31.6161	17.8	3.3	38.2258
2015-08-18 09:00:00	19.9	2.8	32.3326	17.2	1.7	35.4476
2015-08-19 09:00:00	18.2	3.5	37.8002	16.7	2.8	39.5705
2015-08-20 09:00:00	18.5	4.2	38.9593	15.6	5.6	51.6172
2015-08-21 09:00:00	21.7	3.2	29.7407	17.8	5	43.0527
2015-08-22 09:00:00	20.8	4.2	33.741	19.4	3.3	34.5616
2015-08-23 09:00:00	18.6	-0.4	27.8748	15.6	-1.1	32.0749
2015-08-24 09:00:00	24.4	7.4	33.7674	20	4.4	35.9635
2015-08-25 09:00:00	25.1	6	29.3936	20	4.4	35.9635
2015-08-26 09:00:00	20.7	14.2	66.4769	21.7	13.3	58.981
2015-08-27 09:00:00	22	14	60.5957	19.4	13.9	70.659
2015-08-28 09:00:00	20.9	7.5	42.1224	19.4	10.6	56.9406
2015-08-29 09:00:00	25.8	5.3	26.8402	21.1	6.1	37.7972
2015-08-30 09:00:00	22	10.8	49.1423	22.8	8.9	41.2109
2015-08-31 09:00:00	22.1	6.8	37.2903	16.7	1.7	36.5952
2016-06-01 09:00:00	17.5	5.4	45.1105	15	6.1	55.5186
2016-06-02 09:00:00	19.8	3.9	35.1615	15.6	6.7	55.664
2016-06-03 09:00:00	19.4	8.4	49.1461	18.3	8.9	54.4509
2016-06-04 09:00:00	21.1	10	49.2446	20	10.6	54.8569
2016-06-05 09:00:00	21.6	10.1	48.072	20	10	52.7112
2016-06-06 09:00:00	23.2	7.8	37.328	20	11.7	58.9899
2016-06-07 09:00:00	22	9.6	45.364	20	9.4	50.6393
2016-06-08 09:00:00	23	9.9	43.5394	21.1	12.2	56.9555
2016-06-09 09:00:00	24.7	10.4	40.6093	22.2	10	46.0267
2016-06-10 09:00:00	27.1	2.9	20.9591	20.6	10	50.7883
2016-06-11 09:00:00	23.5	8.5	38.4362	18.3	7.2	48.5337
2016-06-12 09:00:00	13.8	12.3	90.7525	13.9	12.2	89.5851
2016-06-13 09:00:00	18.6	11.8	64.7831	16.1	11.7	75.334
2016-06-14 09:00:00	19.2	8.1	48.7642	17.8	11.1	65.0484
2016-06-15 09:00:00	21.2	7	39.9604	16.1	7.2	55.7845
2016-06-16 09:00:00	15.5	6.6	55.6399	14.4	5.6	55.7551
2016-06-17 09:00:00	20	7.3	43.9377	15.6	6.7	55.664
2016-06-18 09:00:00	25.5	1.4	20.7254	21.1	10	49.2446
2016-06-19 09:00:00	20.2	7.4	43.6917	17.8	7.2	50.0857
2016-06-20 09:00:00	22.4	7.1	37.3703	18.9	7.2	46.7405
2016-06-21 09:00:00	25.5	8.2	33.3697	22.8	9.4	42.6212
2016-06-22 09:00:00	22.3	6.8	36.835	20.6	6.1	38.9864
2016-06-23 09:00:00	26.9	9.4	33.2833	23.9	8.9	38.5416
2016-06-24 09:00:00	24.8	4	26.0288	22.2	4.4	31.3802
2016-06-25 09:00:00	17.1	-2.6	26.0808	17.2	0.6	32.7559
2016-06-26 09:00:00	19.2	2.3	32.6033	16.7	4.4	44.2757
2016-06-27 09:00:00	22.7	4.1	29.7963	20	5.6	39.0945
2016-06-28 09:00:00	25.5	5.7	28.1014	21.7	8.3	42.3334
2016-06-29 09:00:00	26.5	7.8	30.5817	23.3	8.3	38.3834
2016-06-30 09:00:00	23.4	11.8	48.2043	21.1	13.9	63.6179
2016-07-01 09:00:00	24	11.6	45.8743	21.1	11.7	55.116
2016-07-02 09:00:00	23.9	9.6	40.4009	23.3	12.2	49.7903
2016-07-03 09:00:00	25.7	8.3	33.1958	25	10	38.8298
2016-07-04 09:00:00	27	7.7	29.4795	22.8	11.7	49.6673
2016-07-05 09:00:00	24.3	7.9	35.152	21.7	8.9	44.0844
2016-07-06 09:00:00	22.8	5.9	33.5747	19.4	7.8	47.1896
2016-07-07 09:00:00	22.1	4.6	32.0191	19.4	5.6	40.5864
2016-07-08 09:00:00	27.9	2	18.7326	22.8	8.3	39.5725
2016-07-09 09:00:00	28.5	1.7	17.6879	22.8	7.8	38.251
2016-07-10 09:00:00	23.2	7.5	36.5722	22.2	8.3	41.0531
2016-07-11 09:00:00	15.2	-0.1	35.3992	15	0.6	37.7192
2016-07-12 09:00:00	18.3	0.9	31.2148	16.1	2.8	41.1164
2016-07-13 09:00:00	22.2	2.1	26.6658	19.4	5	38.9323
2016-07-14 09:00:00	21.2	1.8	27.7659	18.9	2.8	34.4249
2016-07-15 09:00:00	22.3	3	28.2563	21.1	4.4	33.5862
2016-07-16 09:00:00	25.1	3.9	25.3802	22.2	6.1	35.3186
2016-07-17 09:00:00	21.4	3.4	30.7293	19.4	5.6	40.5864
2016-07-18 09:00:00	29.3	6.2	23.195	25	5.6	28.7623
2016-07-19 09:00:00	28.5	9.4	30.2693	30.6	6.7	22.2472
2016-07-20 09:00:00	29.7	8.1	25.8215	31.1	5	19.1915
2016-07-21 09:00:00	29	8.4	27.4633	23.3	4.4	29.332
2016-07-22 09:00:00	30.4	9.1	26.5288	29.4	8.9	27.7513
2016-07-23 09:00:00	24.5	3.8	26.1359	21.1	5.6	36.5132
2016-07-24 09:00:00	22.1	0.3	23.5661	20.6	0.6	26.4367
2016-07-25 09:00:00	25.3	2.2	22.2201	21.7	3.9	31.2465
2016-07-26 09:00:00	29.2	5.7	22.5349	23.3	3.9	28.3191
2016-07-27 09:00:00	25.8	2.4	21.869	23.3	1.1	23.1925
2016-07-28 09:00:00	29	2	17.5454	23.3	6.7	34.4111
2016-07-29 09:00:00	26.1	5	25.8135	23.3	6.7	34.4111
2016-07-30 09:00:00	26.5	5.4	25.9146	23.3	7.8	37.1011
2016-07-31 09:00:00	26.5	11.5	39.219	26.7	9.4	33.6826
2016-08-01 09:00:00	26.9	9.1	32.6163	23.9	9.4	39.8618
2016-08-02 09:00:00	26.3	4.2	24.1123	22.8	5.6	32.8841
2016-08-03 09:00:00	25	10.8	40.9588	25.6	6.7	29.9333
2016-08-04 09:00:00	21.6	-0.7	22.597	16.7	-2.8	26.3625
2016-08-05 09:00:00	24	2.4	24.3945	20	1.1	28.4555
2016-08-06 09:00:00	24.1	10.7	42.9581	21.1	11.7	55.116
2016-08-07 09:00:00	27.4	11.5	37.1752	22.8	13.3	55.1511
2016-08-08 09:00:00	23.4	8.7	39.1976	21.1	10	49.2446
2016-08-09 09:00:00	27.4	3	20.7333	21.1	6.7	39.3899
2016-08-10 09:00:00	21.4	5.3	35.1038	17.8	5.6	44.8793
2016-08-11 09:00:00	19.4	10.3	55.8178	18.9	7.8	48.6876
2016-08-12 09:00:00	20.7	2	29.0555	17.8	2.2	35.3611
2016-08-13 09:00:00	22.2	0.5	23.7634	17.2	2.2	36.7338
2016-08-14 09:00:00	22.1	0.7	24.2599	20	4.4	35.9635
2016-08-15 09:00:00	22.5	0.7	23.6679	22.8	0.6	23.0665
2016-08-16 09:00:00	22.7	4.6	30.8596	21.1	7.2	40.7618
2016-08-17 09:00:00	24.6	5.2	28.6584	21.7	5.6	35.1845
2016-08-18 09:00:00	21.1	5.6	36.5132	21.1	9.4	47.3072
2016-08-19 09:00:00	22.4	6	34.6472	19.4	8.3	48.8152
2016-08-20 09:00:00	19.2	5.1	39.6977	17.2	1.1	33.9564
2016-08-21 09:00:00	21.8	2.8	28.7309	19.4	5.6	40.5864
2016-08-22 09:00:00	23.2	1.9	24.718	19.4	7.8	47.1896
2016-08-23 09:00:00	23.8	5.3	30.2968	17.2	1.1	33.9564
2016-08-24 09:00:00	19.2	1.3	30.3534	15.6	-1.7	30.6936
2016-08-25 09:00:00	15.2	-0.8	33.6426	15	2.8	44.1255
2016-08-26 09:00:00	19.7	1.9	30.7078	16.1	2.2	39.4048
2016-08-27 09:00:00	20.2	1.8	29.5501	16.1	0.6	35.1416
2016-08-28 09:00:00	20.8	0.8	26.4894	17.2	1.7	35.4476
2016-08-29 09:00:00	20.4	1.7	28.9752	18.3	3.3	37.0369
2016-08-30 09:00:00	22.4	1.1	24.5131	18.9	3.3	35.6635
2016-08-31 09:00:00	24.5	1.5	22.1827	22.2	3.9	30.2976

## Sheet: Brook vs. Sioux weather
Date (9 am)	Sioux RH	Brookings RH	Average	Days above 95% RH	SEM
2006-07-01	62.3203	83.1077	71.7983	12	0.420594
2006-07-02	58.0243	57.3933
2006-07-03	56.0061	65.1455
2006-07-04	58.848	56.1618
2006-07-05	56.809	56.4116
2006-07-06	53.2686	56.6597
2006-07-07	61.1897	53.3201
2006-07-08	64.2019	73.4617
2006-07-09	66.5073	56.6597
2006-07-10	63.2358	67.9737
2006-07-11	73.5132	69.1632
2006-07-12	92.84	73.6329
2006-07-13	71.7464	83.3388
2006-07-14	69.2509	83.2238
2006-07-15	58.686	58.1113
2006-07-17	52.6882	53.5762
2006-07-18	46.5063	49.9346
2006-07-19	76.7573	69.1632
2006-07-20	48.2189	47.0128
2006-07-21	81.0894	82.5093
2006-07-22	51.7877	53.5762
2006-07-23	48.673	42.0059
2006-07-24	45.3339	54.0834
2006-07-25	68.9241	69.3555
2006-07-26	73.9036	78.0629
2006-07-27	71.2147	61.6137
2006-07-28	65.1553	65.7712
2006-07-30	59.1664	62.0591
2006-07-31	46.3856	48.6169
2006-08-04	60.0089	68.5761
2006-08-05	73.6158	83.1077
2006-08-06	48.0768	49.6675
2006-08-07	59.6114	60.4702
2006-08-08	78.4247	68.7735
2006-08-09	93.4956	94.0625
2006-08-10	84.9292	78.4976
2006-08-11	70.9032	78.2092
2006-08-12	84.1723	88.3537
2006-08-13	90.071	100
2006-08-14	78.2639	82.8719
2006-08-15	59.1104	68.5761
2006-08-16	61.9519	68.7735
2006-08-17	78.7412	88.3537
2006-08-18	84.2381	88.3537
2006-08-19	80.502	87.9266
2006-08-20	70.285	77.6155
2006-08-21	76.1531	88.27
2006-08-22	57.3491	88.0138
2006-08-23	68.9241	78.2092
2006-08-24	74.0874	88.5183
2006-08-25	78.2639	82.7523
2006-08-26	65.928	77.766
2006-08-27	59.1104	82.6314
2006-08-28	93.2515	87.9266
2006-08-29	63.1014	72.4014
2006-08-30	56.685	72.5821
2006-08-31	67.6176	77.6155
2006-09-01	87.0096	100
2006-09-02	86.5319	93.6024
2006-09-03	77.3406	93.6024
2006-09-04	77.8468	87.9266
2006-09-05	70.512	82.5093
2006-09-06	67.935	77.4635
2006-09-07	63.2358	77.4635
2006-09-08	77.8468	93.6985
2006-09-09	86.4827	81.7501
2006-09-10	92.9935	100
2006-09-11	86.4827	93.5535
2006-09-12	96.1078	100
2006-09-13	72.4377	82.2614
2006-09-14	65.3351	72.5821
2006-09-15	51.3928	67.9737
2006-09-16	75.4164	82.7523
2006-09-17	63.1016	75.8597
2006-09-18	92.7542	93.3522
2006-09-19	58.0882	81.0806
2006-09-20	76.1777	75.5197
2006-09-21	89.2697	93.504
2006-09-22	92.9935	93.504
2006-09-23	92.9935	93.6024
2006-09-24	71.4152	76.1931
2006-09-25	66.7757	81.7501
2006-09-26	66.58	71.849
2006-09-27	71.5103	76.3573
2006-09-28	76.3607	86.9027
2006-09-29	63.7458	76.1931
2006-09-30	57.8708	62.7165
2007-07-01	63.2034	64.2872
2007-07-02	73.4273	78.0629
2007-07-03	73.8025	78.2092
2007-07-05	50.7143	57.6343
2007-07-06	45.1701	50.2001
2007-07-07	64.7991	61.6137
2007-07-09	64.0938	64.7199
2007-07-10	61.0511	67.9737
2007-07-11	52.8287	55.6568
2007-07-13	51.1022	59.7628
2007-07-14	51.7877	60.4702
2007-07-15	53.5507	64.5044
2007-07-16	64.331	69.1632
2007-07-17	71.9422	83.3388
2007-07-18	76.5504	88.5994
2007-07-19	55.7957	53.3201
2007-07-20	52.9845	63.8475
2007-07-21	70.4931	77.766
2007-07-22	76.5891	94.0188
2007-07-23	71.6111	88.6796
2007-07-24	74.2695	94.1058
2007-07-25	73.9874	73.9706
2007-07-26	64.9254	78.4976
2007-07-27	55.7354	64.7199
2007-07-28	59.6114	60.7024
2007-07-29	57.7607	73.4617
2007-07-30	69.1361	73.6329
2007-07-31	66.7313	78.3541
2007-08-01	76.2119	83.3388
2007-08-02	63.9635	60.2362
2007-08-03	46.6696	53.3201
2007-08-04	84.0507	88.1001
2007-08-05	84.0507	93.8388
2007-08-06	87.3652	100
2007-08-07	84.9292	78.2092
2007-08-08	82.9904	73.1147
2007-08-09	79.3849	83.2238
2007-08-10	68.4941	82.9904
2007-08-11	71.4138	78.6399
2007-08-12	61.0511	72.4014
2007-08-13	71.2147	73.6329
2007-08-14	81.1595	93.9745
2007-08-15	79.3849	93.9298
2007-08-16	61.4422	68.377
2007-08-17	54.4787	59.7628
2007-08-18	90.3187	93.8388
2007-08-19	86.6759	93.6985
2007-08-20	90.028	93.9298
2007-08-21	81.1595	83.1077
2007-08-22	93.3606	93.9745
2007-08-23	93.336	93.8845
2007-08-24	70.285	72.5821
2007-08-25	65.3988	77.155
2007-08-26	70.6991	73.289
2007-08-27	76.7573	88.5994
2007-08-28	87.4187	100
2007-08-29	67.4862	72.2189
2007-08-30	58.5589	67.7694
2007-08-31	63.2034	82.7523
2007-09-01	68.3754	68.7735
2007-09-02	66.225	68.7735
2007-09-03	64.0938	73.4617
2007-09-04	59.7523	60.7024
2007-09-05	76.4966	78.2092
2007-09-06	78.8264	78.2092
2007-09-07	72.7434	72.4014
2007-09-08	74.8765	87.5683
2007-09-09	73.9051	81.4864
2007-09-10	83.0151	81.8798
2007-09-11	66.6695	71.2813
2007-09-12	54.4024	53.8314
2007-09-13	69.194	57.7953
2007-09-14	65.5814	65.6259
2007-09-15	65.4476	61.2969
2007-09-16	92.8426	93.4034
2007-09-17	71.2394	93.9298
2007-09-18	83.995	93.9298
2007-09-19	77.2468	87.4763
2007-09-20	75.9787	82.7523
2007-09-21	57.7607	68.7735
2007-09-22	53.9654	59.039
2007-09-23	66.4532	73.1147
2007-09-24	78.6698	88.3537
2007-09-25	76.994	87.2892
2007-09-26	71.718	81.7501
2007-09-27	49.8757	62.7165
2007-09-28	53.2285	62.251
2007-09-29	78.012	82.6314
2007-09-30	78.1014	93.8388
2008-07-01	40.5695	53.3201
2008-07-02	44.6955	52.2783
2008-07-03	50.1735	59.039
2008-07-04	44.2598	60.0004
2008-07-05	59.7523	68.7735
2008-07-06	67.2457	83.3388
2008-07-07	81.5902	78.0629
2008-07-08	40.5695	60.4702
2008-07-09	55.9441	60.4702
2008-07-10	58.2859	73.4617
2008-07-11	65.0301	69.7354
2008-07-12	39.5694	45.6333
2008-07-13	45.9028	49.3987
2008-07-14	45.1701	44.0051
2008-07-15	54.2593	73.4617
2008-07-16	51.7877	60.9329
2008-07-17	86.7792	88.27
2008-07-18	71.2394	73.1147
2008-07-19	86.7792	82.8719
2008-07-20	81.8026	73.6329
2008-07-21	66.1572	64.7199
2008-07-22	55.9441	64.7199
2008-07-23	70.6991	73.1147
2008-07-24	81.5902	82.9904
2008-07-25	59.8692	73.4617
2008-07-26	65.4633	60.2362
2008-07-27	87.3652	88.1001
2008-07-28	71.2147	83.2238
2008-07-29	58.5453	69.1632
2008-07-30	71.7464	68.7735
2008-07-31	66.225	60.2362
2008-08-01	71.4401	68.9692
2008-08-02	53.3971	56.6597
2008-08-03	78.9813	83.1077
2008-08-04	78.7412	78.2092
2008-08-05	68.7101	73.289
2008-08-06	87.1664	88.1855
2008-08-07	63.9635	60.4702
2008-08-08	59.1104	60.2362
2008-08-09	62.1995	68.7735
2008-08-10	78.2639	88.1001
2008-08-11	80.8742	82.8719
2008-08-12	68.3754	82.8719
2008-08-13	64.2019	82.7523
2008-08-14	70.4931	93.8845
2008-08-15	81.0894	82.7523
2008-08-16	71.0367	77.9152
2008-08-17	68.276	64.5044
2008-08-18	68.4941	68.7735
2008-08-20	57.3491	60.4702
2008-08-21	71.0367	73.1147
2008-08-22	71.4401	73.4617
2008-08-23	62.6031	67.1458
2008-08-24	56.5357	63.625
2008-08-25	52.6983	63.625
2008-08-26	70.512	72.5821
2008-08-27	75.8024	55.6568
2008-08-28	80.8742	82.6314
2008-08-29	42.2046	49.1282
2008-08-30	55.037	60.2362
2008-08-31	66.4532	68.7735
2008-09-02	77.5112	82.0083
2008-09-03	66.5414	71.2813
2008-09-04	64.5453	62.7165
2008-09-05	71.8304	76.52
2008-09-06	69.194	71.6615
2008-09-07	86.5319	81.8798
2008-09-08	71.8304	66.721
2008-09-09	66.7757	76.3573
2008-09-10	69.8765	71.849
2008-09-11	82.7523	82.7523
2008-09-12	74.7697	93.6024
2008-09-13	89.6591	93.6507
2008-09-14	79.4961	76.1931
2008-09-15	63.9948	71.4723
2008-09-16	58.4126	59.039
2008-09-17	70.0904	55.9102
2008-09-18	56.685	63.625
2008-09-19	65.6345	67.9737
2008-09-20	65.3351	77.31
2008-09-21	65.4633	72.5821
2008-09-22	73.1322	77.766
2008-09-23	78.6778	88.1001
2008-09-24	55.4206	66.721
2008-09-25	81.3101	77.4635
2008-09-26	59.1104	60.4702
2008-09-27	86.5319	81.8798
2008-09-28	92.9348	93.504
2008-09-29	59.3364	71.2813
2008-09-30	71.5103	81.3525
2009-07-01	73.0445	68.1762
2009-07-02	57.2271	60.4702
2009-07-03	90.4728	68.5761
2009-07-04	93.2515	82.7523
2009-07-05	59.7523	60.4702
2009-07-06	66.6793	68.9692
2009-07-07	68.7101	73.1147
2009-07-08	83.9277	77.4635
2009-07-09	90.4728	82.8719
2009-07-10	78.7412	77.9152
2009-07-11	65.4633	67.9737
2009-07-12	90.4728	77.9152
2009-07-13	78.6698	60.2362
2009-07-14	84.8139	82.9904
2009-07-15	56.685	59.2821
2009-07-16	64.8595	55.4015
2009-07-17	50.3531	55.4015
2009-07-18	58.6802	59.2821
2009-07-19	54.5344	63.625
2009-07-20	75.8024	72.7613
2009-07-21	82.7523	77.6155
2009-07-22	59.1104	60.2362
2009-07-23	59.6114	60.2362
2009-07-24	73.7009	73.4617
2009-07-25	59.6114	60.2362
2009-07-26	59.6114	60.4702
2009-07-27	71.4401	73.289
2009-07-28	52.9845	63.625
2009-07-29	54.9681	59.7628
2009-07-30	77.7712	77.155
2009-07-31	63.2358	64.0683
2009-08-01	69.5309	76.8406
2009-08-02	72.9388	72.4014
2009-08-03	75.7709	77.4635
2009-08-04	67.5889	59.2821
2009-08-05	63.1014	67.9737
2009-08-06	70.285	72.7613
2009-08-07	84.1723	82.7523
2009-08-08	87.6118	82.9904
2009-08-09	96.9324	88.1001
2009-08-10	78.5116	72.7613
2009-08-11	66.4532	68.7735
2009-08-12	79.3849	73.289
2009-08-13	60.2634	68.9692
2009-08-14	66.3843	69.1632
2009-08-15	90.028	77.9152
2009-08-16	81.2326	82.5093
2009-08-17	72.8325	72.4014
2009-08-18	56.5357	55.6568
2009-08-19	93.3606	82.6314
2009-08-20	80.353	77.155
2009-08-21	77.8468	72.2189
2009-08-23	72.9388	72.7613
2009-08-24	78.2639	68.377
2009-08-25	81.1677	72.5821
2009-08-26	81.0894	68.1762
2009-08-27	78.1014	68.1762
2009-08-28	78.6778	68.377
2009-08-29	75.1628	71.6615
2009-08-30	69.194	62.7165
2009-08-31	72.0348	71.849
2009-09-01	69.8765	71.849
2009-09-02	74.7697	67.5633
2009-09-03	90.3187	72.5821
2009-09-04	72.6361	72.4014
2009-09-05	78.1014	72.4014
2009-09-06	78.2639	77.4635
2009-09-07	78.2639	72.7613
2009-09-08	78.4247	68.5761
2009-09-09	93.3899	82.7523
2009-09-10	73.2368	77.6155
2009-09-11	78.2639	77.4635
2009-09-12	100	77.155
2009-09-13	81.2326	77.766
2009-09-14	72.8325	72.5821
2009-09-15	70.3022	67.9737
2009-09-16	67.935	64.0683
2009-09-17	72.9388	68.377
2009-09-18	70.285	60.2362
2009-09-19	65.3351	67.9737
2009-09-20	62.7399	59.2821
2009-09-21	89.5752	82.5093
2009-09-22	86.6392	82.1355
2009-09-23	83.4805	82.1355
2009-09-24	96.2049	77.31
2009-09-25	90.0363	82.0083
2009-09-26	86.5905	82.0083
2009-09-27	67.3623	62.9464
2009-09-28	58.367	61.2969
2009-09-29	79.799	70.6975
2009-09-30	71.2044	66.0697
2010-07-01	57.7607	64.7199
2010-07-02	57.9863	60.9329
2010-07-03	69.3461	73.9706
2010-07-04	87.3652	88.3537
2010-07-05	76.3257	68.9692
2010-07-06	78.7412	64.7199
2010-07-07	83.9277	88.1001
2010-07-08	59.7523	64.7199
2010-07-09	68.8076	60.9329
2010-07-10	61.9408	69.1632
2010-07-11	78.5116	73.1147
2010-07-12	67.8134	59.7628
2010-07-13	78.8264	78.2092
2010-07-14	74.3516	78.7807
2010-07-15	57.3491	60.4702
2010-07-16	68.9241	65.1455
2010-07-17	82.3361	78.7807
2010-07-18	81.0176	77.766
2010-07-19	90.3187	68.1762
2010-07-20	81.8026	78.2092
2010-07-21	73.3236	68.9692
2010-07-22	84.1723	88.5183
2010-07-23	81.8026	73.289
2010-07-24	75.5946	64.0683
2010-07-25	75.7709	64.5044
2010-07-26	87.2664	73.6329
2010-07-27	65.0301	69.7354
2010-07-28	65.6967	60.2362
2010-07-29	65.928	68.7735
2010-07-30	84.1723	93.9298
2010-07-31	76.7573	94.1058
2010-08-01	71.7464	69.5463
2010-08-02	96.9959	83.3388
2010-08-03	81.6504	78.7807
2010-08-04	76.5891	69.1632
2010-08-05	51.2128	60.2362
2010-08-06	73.5132	68.9692
2010-08-07	73.9036	78.3541
2010-08-08	77.0886	78.7807
2010-08-09	81.9381	69.7354
2010-08-10	79.3849	88.5183
2010-08-11	81.6504	78.7807
2010-08-12	74.3516	78.7807
2010-08-13	84.3576	88.3537
2010-08-14	71.2394	60.4702
2010-08-15	67.8134	63.8475
2010-08-16	65.3351	64.0683
2010-08-17	75.4164	63.8475
2010-08-18	83.9277	82.8719
2010-08-19	81.1595	83.1077
2010-08-20	71.2147	78.3541
2010-08-21	96.9959	94.0625
2010-08-22	71.4138	73.9706
2010-08-23	71.2147	73.8025
2010-08-24	62.9889	63.625
2010-08-25	67.5889	63.4006
2010-08-26	65.3351	72.4014
2010-08-27	55.2461	56.6597
2010-08-30	73.8025	69.5463
2010-08-31	81.5902	73.289
2010-09-01	75.5265	72.5821
2010-09-02	80.2023	82.2614
2010-09-03	66.7757	71.6615
2010-09-04	64.3752	67.3555
2010-09-05	74.7697	76.9986
2010-09-06	87.0096	87.9266
2010-09-07	64.5453	66.9343
2010-09-08	74.6887	71.6615
2010-09-09	83.3511	82.1355
2010-09-10	96.855	87.8385
2010-09-11	72.2373	63.1744
2010-09-12	75.1374	55.9102
2010-09-13	62.6031	67.5633
2010-09-15	83.8034	87.7494
2010-09-16	89.2296	93.454
2010-09-17	89.5752	93.6985
2010-09-18	85.6805	70.2993
2010-09-19	66.066	62.0153
2010-09-20	96.173	93.6507
2010-09-21	75.3456	76.9986
2010-09-22	83.0879	87.4763
2010-09-23	100	100
2010-09-24	73.7093	87.2892
2010-09-25	86.4827	87.6593
2010-09-26	92.2857	87.4763
2010-09-27	71.5103	76.6811
2010-09-28	80.2023	87.7494
2010-09-29	62.8533	72.4014
2010-09-30	61.8146	71.849
2011-07-01	71.6111	57.8737
2011-07-02	68.7101	56.906
2011-07-03	71.0367	53.5762
2011-07-04	76.3257	64.7199
2011-07-05	84.8139	64.2872
2011-07-06	63.9635	49.9346
2011-07-07	57.9048	53.3201
2011-07-08	62.4309	57.6343
2011-07-09	64.2925	64.9335
2011-07-10	65.0301	61.6137
2011-07-11	59.7689	60.7024
2011-07-12	90.3962	68.1762
2011-07-13	70.285	59.7628
2011-07-14	96.3617	73.1147
2011-07-15	81.6504	69.7354
2011-07-16	77.0886	65.5643
2011-07-17	72.3283	65.9764
2011-07-18	67.6817	55.3219
2011-07-19	65.3831	58.5814
2011-07-20	60.9018	51.5031
2011-07-21	59.7523	53.0622
2011-07-22	79.1345	65.1455
2011-07-23	81.8644	57.1505
2011-07-24	78.4247	56.4116
2011-07-25	81.8644	57.6343
2011-07-26	78.9813	56.906
2011-07-27	87.5596	61.6137
2011-07-28	84.9292	60.9329
2011-07-29	71.2147	64.9335
2011-07-30	84.9292	65.3558
2011-07-31	82.2049	65.3558
2011-08-01	67.3912	69.7354
2011-08-02	67.2457	65.3558
2011-08-03	57.2271	49.6675
2011-08-04	64.0938	56.906
2011-08-05	87.4629	64.9335
2011-08-06	84.3576	53.5762
2011-08-07	84.0507	63.8475
2011-08-08	78.6698	64.5044
2011-08-09	67.6176	63.625
2011-08-10	62.958	56.1618
2011-08-11	61.3048	56.4116
2011-08-12	78.4247	60.0004
2011-08-13	78.6778	63.8475
2011-08-14	70.6991	60.2362
2011-08-15	73.4273	60.4702
2011-08-16	78.4247	68.1762
2011-08-17	57.0801	56.1618
2011-08-18	75.7709	60.2362
2011-08-19	75.5946	55.9102
2011-08-20	77.6799	55.4015
2011-08-21	70.8321	56.1618
2011-08-22	78.6698	60.4702
2011-08-23	73.9036	64.9335
2011-08-24	57.495	43.7269
2011-08-25	56.809	55.9102
2011-08-26	62.1869	47.8218
2011-08-27	63.2358	59.2821
2011-08-28	92.5705	71.849
2011-08-29	73.0445	63.625
2011-08-30	87.1114	72.5821
2011-08-31	96.3913	73.289
2011-09-01	82.0722	69.1632
2011-09-02	90.4728	67.9737
2011-09-03	75.5946	63.8475
2011-09-04	62.6031	54.8856
2011-09-05	64.486	58.5472
2011-09-06	64.6184	51.7469
2011-09-07	62.8533	55.4015
2011-09-08	75.1374	63.625
2011-09-09	63.7231	60.0004
2011-09-10	63.4805	59.7628
2011-09-11	59.6114	53.0622
2011-09-12	51.2128	52.8026
2011-09-13	49.2739	54.3622
2011-09-14	49.2108	45.4594
2011-09-15	51.3637	48.983
2011-09-16	76.3607	65.6259
2011-09-17	82.8804	66.2887
2011-09-18	93.0515	76.52
2011-09-19	62.3505	58.5472
2011-09-20	62.0958	62.4847
2011-09-21	71.5103	93.454
2011-09-22	71.0885	81.3525
2011-09-23	65.8248	66.0697
2011-09-24	60.8905	66.5057
2011-09-25	61.5795	71.2813
2011-09-26	69.5418	76.6811
2011-09-27	64.6184	76.8406
2011-09-28	62.6031	59.2821
2011-09-29	42.3624	47.7509
2011-09-30	66.066	70.8939
2012-07-01	72.1362	78.7807
2012-07-02	58.5453	65.7712
2012-07-03	60.2767	78.4976
2012-07-04	49.6975	62.0591
2012-07-05	73.9874	83.3388
2012-07-06	51.7172	62.0591
2012-07-07	63.8545	68.5761
2012-07-08	68.4941	68.7735
2012-07-09	50.8702	69.1632
2012-07-10	42.0315	50.7262
2012-07-11	50.427	53.5762
2012-07-12	56.0061	77.9152
2012-07-13	48.9643	61.3885
2012-07-14	44.6212	54.3344
2012-07-15	58.2859	65.3558
2012-07-16	38.8144	48.3534
2012-07-17	58.5453	83.2238
2012-07-18	66.7313	78.2092
2012-07-19	62.804	74.1372
2012-07-20	73.9036	78.4976
2012-07-21	58.4277	88.5183
2012-07-22	40.3383	65.7712
2012-07-23	47.7176	58.1113
2012-07-24	53.0646	73.9706
2012-07-25	51.2702	69.9228
2012-07-26	46.8258	53.8306
2012-07-27	67.6176	72.7613
2012-07-28	87.0652	77.9152
2012-07-29	66.1572	73.4617
2012-07-30	58.5453	78.4976
2012-07-31	57.9048	69.1632
2012-08-01	54.8068	65.5643
2012-08-02	71.4401	61.1616
2012-08-03	73.6158	73.4617
2012-08-04	75.7055	67.9737
2012-08-05	52.3837	59.7628
2012-08-06	49.9791	56.906
2012-08-07	47.5579	54.3344
2012-08-08	66.225	88.1001
2012-08-09	63.8545	73.289
2012-08-10	83.4219	82.386
2012-08-11	61.0567	72.4014
2012-08-12	77.9371	82.386
2012-08-13	67.935	82.6314
2012-08-14	56.9571	68.1762
2012-08-15	68.3754	73.289
2012-08-16	60.0146	67.3555
2012-08-17	46.552	72.2189
2012-08-18	89.4904	77.155
2012-08-19	72.4377	77.31
2012-08-20	58.8253	56.1618
2012-08-21	56.5357	67.9737
2012-08-22	48.3797	53.5762
2012-08-23	57.9863	60.9329
2012-08-24	71.4401	78.2092
2012-08-25	93.3606	93.9298
2012-08-26	100	100
2012-08-27	78.5837	64.7199
2012-08-28	70.9032	78.2092
2012-08-29	46.5282	64.7199
2012-08-30	34.0463	53.3201
2012-08-31	42.941	49.6675
2012-09-01	53.2686	60.4702
2012-09-02	57.9863	64.7199
2012-09-03	60.0089	64.7199
2012-09-04	68.7101	68.7735
2012-09-05	60.7953	63.625
2012-09-06	45.2919	67.7694
2012-09-07	65.1609	72.2189
2012-09-08	44.8147	48.5823
2012-09-09	66.9026	71.6615
2012-09-10	45.1522	48.8561
2012-09-11	32.0855	40.6032
2012-09-22	62.3229	75.3472
2012-09-23	47.3895	53.021
2012-09-24	40.4562	38.8765
2012-09-25	51.2085	54.0977
2012-09-26	43.3854	57.7953
2012-09-27	46.6251	53.8314
2012-09-28	45.1414	50.9366
2012-09-29	45.6065	41.4494
2012-09-30	49.2739	48.0298
2013-07-01	55.5219	77.9152
2013-07-02	59.7523	88.1001
2013-07-03	66.1572	88.1001
2013-07-04	63.8545	88.1001
2013-07-05	64.0938	88.1001
2013-07-06	64.331	88.5994
2013-07-07	71.1053	88.5994
2013-07-08	78.9813	73.6329
2013-07-09	71.7464	73.6329
2013-07-10	72.9388	57.1505
2013-07-11	59.6114	56.906
2013-07-12	61.9408	64.2872
2013-07-13	64.2925	46.1898
2013-07-14	83.995	56.906
2013-07-15	59.7689	73.289
2013-07-16	52.2265	53.5762
2013-07-17	58.4277	53.5762
2013-07-18	60.2767	60.9329
2013-07-19	53.9825	57.6343
2013-07-20	83.995	73.8025
2013-07-21	66.6793	83.2238
2013-07-22	69.1361	68.1762
2013-07-23	75.1374	56.906
2013-07-24	63.2034	64.9335
2013-07-25	71.4401	83.3388
2013-07-26	67.2586	93.9745
2013-07-27	57.5965	73.6329
2013-07-28	49.8757	65.3558
2013-07-29	62.6031	65.5643
2013-07-30	81.3101	65.5643
2013-07-31	87.0652	68.9692
2013-08-01	68.7101	77.9152
2013-08-02	67.935	69.1632
2013-08-03	72.7434	83.3388
2013-08-04	67.5889	82.5093
2013-08-05	93.4718	60.2362
2013-08-06	75.5946	83.1077
2013-08-07	75.1374	67.5633
2013-08-08	81.2326	58.5472
2013-08-09	67.6176	51.7469
2013-08-10	78.012	67.7694
2013-08-11	86.6759	93.8388
2013-08-12	68.1562	88.0138
2013-08-13	78.1014	73.289
2013-08-14	72.5461	63.8475
2013-08-15	83.6085	67.7694
2013-08-16	92.5705	77.155
2013-08-17	68.1562	83.1077
2013-08-18	58.848	68.7735
2015-07-01	90.3962	82.5093
2015-07-02	72.6361	67.5633
2015-07-03	86.9629	88.0138
2015-07-04	73.4273	78.0629
2015-07-05	81.1595	78.2092
2015-07-06	92.84	88.1001
2015-07-07	57.8708	62.7165
2015-07-08	69.7463	67.9737
2015-07-09	73.1322	68.377
2015-07-10	68.8076	73.289
2015-07-11	84.8139	88.3537
2015-07-12	82.2049	88.5994
2015-07-13	60.2634	61.3885
2015-07-14	71.2147	78.2092
2015-07-15	78.8264	78.3541
2015-07-16	84.1723	82.9904
2015-07-17	66.7313	73.9706
2015-07-18	64.0566	69.1632
2015-07-19	57.3491	53.3201
2015-07-20	61.6926	60.4702
2015-07-21	57.0801	60.2362
2015-07-22	63.9635	60.4702
2015-07-23	68.8076	68.9692
2015-07-24	71.6111	78.7807
2015-07-25	62.1869	65.1455
2015-07-26	81.5902	77.9152
2015-07-27	87.6118	83.5653
2015-07-28	76.4966	73.6329
2015-07-29	56.9571	52.8026
2015-07-30	57.9863	60.7024
2015-07-31	59.8692	53.3201
2015-08-01	73.7009	73.4617
2015-08-02	71.4401	60.9329
2015-08-03	57.0801	60.2362
2015-08-04	70.8321	63.8475
2015-08-05	63.9635	60.2362
2015-08-06	87.3652	88.3537
2015-08-07	66.5073	78.2092
2015-08-08	66.6094	82.9904
2015-08-09	84.3576	78.3541
2015-08-10	65.928	68.5761
2015-08-11	57.9048	78.0629
2015-08-12	58.0243	78.2092
2015-08-13	78.5837	78.2092
2015-08-14	62.3203	83.3388
2015-08-15	60.0238	73.6329
2015-08-16	66.6793	82.9904
2015-08-17	89.6591	82.386
2015-08-18	86.1913	82.1355
2015-08-19	74.5829	76.8406
2015-08-20	65.6345	67.9737
2015-08-21	63.4805	72.7613
2015-08-22	78.8264	83.1077
2015-08-23	61.9559	66.9343
2015-08-24	66.58	66.9343
2015-08-25	69.5309	59.039
2015-08-26	69.8765	71.849
2015-08-27	81.4509	88.1001
2015-08-28	93.336	77.766
2015-08-29	93.1398	87.9266
2015-08-30	93.2815	88.1001
2015-08-31	84.1723	82.9904
2015-09-01	84.2381	83.1077
2015-09-02	81.8026	83.1077
2015-09-03	81.8026	83.2238
2015-09-04	73.9036	78.3541
2015-09-05	84.3576	78.3541
2015-09-06	76.7573	73.9706
2015-09-07	67.8134	59.5234
2015-09-08	70.1707	67.9737
2015-09-09	75.3456	82.2614
2015-09-10	78.012	67.7694
2015-09-11	71.6238	71.2813
2015-09-12	77.2468	71.4723
2015-09-13	62.0701	59.2821
2015-09-14	70.285	77.4635
2015-09-15	65.6967	68.5761
2015-09-16	71.2394	68.9692
2015-09-17	81.1595	64.2872
2015-09-19	100	87.3832
2015-09-20	65.1609	67.5633
2015-09-21	78.1014	77.31
2015-09-22	77.9371	63.1744
2015-09-23	78.6778	88.1001
2015-09-24	93.3064	88.1001
2015-09-25	78.6778	77.4635
2015-09-26	72.6361	77.31
2015-09-27	60.9351	60.0004
2015-09-28	78.1014	77.31
2015-09-29	61.6976	50.6629
2015-09-30	50.4427	46.9043
2016-07-01	70.0904	69.8765
2016-07-02	67.6176	62.958
2016-07-03	67.5889	65.0984
2016-07-04	78.2639	84.3944
2016-07-05	79.3849	84.8139
2016-07-06	73.6158	66.225
2016-07-07	80.8742	93.3064
2016-07-08	63.4805	70.512
2016-07-09	57.9863	65.928
2016-07-10	84.3944	96.2845
2016-07-11	77.2517	87.1114
2016-07-12	49.8465	55.2461
2016-07-13	45.0332	61.1897
2016-07-14	55.037	67.935
2016-07-15	54.0415	62.8533
2016-07-16	65.5696	72.9388
2016-07-17	78.5116	75.5946
2016-07-18	66.6793	68.5925
2016-07-19	81.9381	90.1491
2016-07-20	81.9381	71.6111
2016-07-21	71.8064	77.0886
2016-07-23	87.5158	96.9712
2016-07-24	66.6793	75.9787
2016-07-25	61.9408	68.8076
2016-07-26	64.0566	71.1053
2016-07-27	68.6121	84.1172
2016-07-28	75.5946	87.0652
2016-07-29	63.2034	61.0511
2016-07-30	71.0367	70.4931
2016-07-31	78.5837	78.6698
2016-08-01	87.3652	93.4431
2016-08-02	84.8139	84.3576
2016-08-04	76.3257	75.5946
2016-08-05	61.4422	70.1707
2016-08-06	57.3491	68.1562
2016-08-07	59.6114	61.3048
2016-08-08	71.0367	75.9787
2016-08-09	81.8644	81.9381
2016-08-10	76.5504	87.4629
2016-08-11	81.5902	78.7412
2016-08-12	81.4509	96.9324
2016-08-13	75.7709	78.5116
2016-08-14	57.495	73.1322
2016-08-15	59.8692	75.9787
2016-08-16	66.1572	81.5902
2016-08-17	61.9408	76.3257
2016-08-18	73.9036	84.3576
2016-08-19	84.1172	84.2731
2016-08-20	96.2222	86.8025
2016-08-21	67.7117	75.3456
2016-08-22	57.3491	65.5696
2016-08-23	75.7709	76.1531
2016-08-24	67.6176	65.6345
2016-08-25	75.1628	80.5688
2016-08-26	72.6361	77.6799
2016-08-27	93.3064	86.3001
2016-08-28	84.3576	84.2381
2016-09-06	87.2664	93.8388
2016-09-07	90.071	93.8845
2016-09-15	100	100

## Sheet: All predictors
Days in growing period	Date of harvest	ave SMD(%) 1-42	SMD (%) 1-28	SMD (%) 1-14	SMD (%) 15-28	SMD(%) 29-42	SMD 15-42	Ave SMD % ALL	1-42 DAYS Humidity over 95	1-28 DAYS humidity >95	1-14 DAYS >95%	15-28 DAYS >95%	29-42 DAYS >95%	15-42 DAYS >95%	All >=95%	Month	All >90	1-42 DAYS >90%	1-28 days >90%	1-14 DAYS >90%	15-28 days >90%	29-42 days >90%	15-42 DAYS	All >85	1-42 DAYS >85%	1-28 days >90%	1-14 DAYS >85%	15-28 days >90%	29-42 days >85%	15-42 DAYS >85%	All >80	1-42 DAYS >80%	1-28 days >80%	1-14 DAYS >80%	15-28 days >80%	29-42 days >80%	15-42 DAYS >80%	All >70	1-42 DAYS >70%	1-28 days >70%	1-14 DAYS >70%	15-28 days >70%	29-42 days >70%	15-42 DAYS >70%	All Days sum rainfall	1-14 Days sum rainfall	1-28 Days sum rainfall	1-41 DAYS rainfall	15-28 Days sum rainfall
32	2015-02-09	94.6	94	92.9	96	98.7	96	94.6	4	3	2	1	1	2	4	2	6	6	5	4	1	1	2	10	10	9	6	3	1	4	13	13	12	7	5	1	6	26	26	22	10	12	4	16	16.6	12	16.6	16.6	4.6
32	2015-02-09	94.6	94	92.9	96	98.7	96	94.6	4	3	2	1	1	2	4	2	6	6	5	4	1	1	2	10	10	9	6	3	1	4	13	13	12	7	5	1	6	26	26	22	10	12	4	16	16.6	12	16.6	16.6	4.6
32	2015-02-09	94.6	94	92.9	96	98.7	96	94.6	4	3	2	1	1	2	4	2	6	6	5	4	1	1	2	10	10	9	6	3	1	4	13	13	12	7	5	1	6	26	26	22	10	12	4	16	16.6	12	16.6	16.6	4.6
32	2015-02-09	94.6	94	92.9	96	98.7	96	94.6	4	3	2	1	1	2	4	2	6	6	5	4	1	1	2	10	10	9	6	3	1	4	13	13	12	7	5	1	6	26	26	22	10	12	4	16	16.6	12	16.6	16.6	4.6
32	2015-02-09	94.6	94	92.9	96	98.7	96	94.6	4	3	2	1	1	2	4	2	6	6	5	4	1	1	2	10	10	9	6	3	1	4	13	13	12	7	5	1	6	26	26	22	10	12	4	16	16.6	12	16.6	16.6	4.6
32	2015-02-09	94.6	94	92.9	96	98.7	96	94.6	4	3	2	1	1	2	4	2	6	6	5	4	1	1	2	10	10	9	6	3	1	4	13	13	12	7	5	1	6	26	26	22	10	12	4	16	16.6	12	16.6	16.6	4.6
32	2015-02-09	94.6	94	92.9	96	98.7	96	94.6	4	3	2	1	1	2	4	2	6	6	5	4	1	1	2	10	10	9	6	3	1	4	13	13	12	7	5	1	6	26	26	22	10	12	4	16	16.6	12	16.6	16.6	4.6
32	2015-02-09	94.6	94	92.9	96	98.7	96	94.6	4	3	2	1	1	2	4	2	6	6	5	4	1	1	2	10	10	9	6	3	1	4	13	13	12	7	5	1	6	26	26	22	10	12	4	16	16.6	12	16.6	16.6	4.6
32	2015-02-09	94.6	94	92.9	96	98.7	96	94.6	4	3	2	1	1	2	4	2	6	6	5	4	1	1	2	10	10	9	6	3	1	4	13	13	12	7	5	1	6	26	26	22	10	12	4	16	16.6	12	16.6	16.6	4.6
32	2015-02-09	94.6	94	92.9	96	98.7	96	94.6	4	3	2	1	1	2	4	2	6	6	5	4	1	1	2	10	10	9	6	3	1	4	13	13	12	7	5	1	6	26	26	22	10	12	4	16	16.6	12	16.6	16.6	4.6
56	2015-03-05	92.5	91.2	92.2	91.4	94.1	92.8	93.5	6	4	4	0	2	2	8	3	16	14	10	8	2	4	6	24	20	14	9	5	6	11	31	26	19	11	8	7	15	49	37	25	14	11	12	23	27.8	9.8	20.6	25.8	10.8
56	2015-03-05	92.5	91.2	92.2	91.4	94.1	92.8	93.5	6	4	4	0	2	2	8	3	16	14	10	8	2	4	6	24	20	14	9	5	6	11	31	26	19	11	8	7	15	49	37	25	14	11	12	23	27.8	9.8	20.6	25.8	10.8
56	2015-03-05	92.5	91.2	92.2	91.4	94.1	92.8	93.5	6	4	4	0	2	2	8	3	16	14	10	8	2	4	6	24	20	14	9	5	6	11	31	26	19	11	8	7	15	49	37	25	14	11	12	23	27.8	9.8	20.6	25.8	10.8
56	2015-03-05	92.5	91.2	92.2	91.4	94.1	92.8	93.5	6	4	4	0	2	2	8	3	16	14	10	8	2	4	6	24	20	14	9	5	6	11	31	26	19	11	8	7	15	49	37	25	14	11	12	23	27.8	9.8	20.6	25.8	10.8
56	2015-03-05	92.5	91.2	92.2	91.4	94.1	92.8	93.5	6	4	4	0	2	2	8	3	16	14	10	8	2	4	6	24	20	14	9	5	6	11	31	26	19	11	8	7	15	49	37	25	14	11	12	23	27.8	9.8	20.6	25.8	10.8
56	2015-03-05	92.5	91.2	92.2	91.4	94.1	92.8	93.5	6	4	4	0	2	2	8	3	16	14	10	8	2	4	6	24	20	14	9	5	6	11	31	26	19	11	8	7	15	49	37	25	14	11	12	23	27.8	9.8	20.6	25.8	10.8
56	2015-03-05	92.5	91.2	92.2	91.4	94.1	92.8	93.5	6	4	4	0	2	2	8	3	16	14	10	8	2	4	6	24	20	14	9	5	6	11	31	26	19	11	8	7	15	49	37	25	14	11	12	23	27.8	9.8	20.6	25.8	10.8
56	2015-03-05	92.5	91.2	92.2	91.4	94.1	92.8	93.5	6	4	4	0	2	2	8	3	16	14	10	8	2	4	6	24	20	14	9	5	6	11	31	26	19	11	8	7	15	49	37	25	14	11	12	23	27.8	9.8	20.6	25.8	10.8
56	2015-03-05	92.5	91.2	92.2	91.4	94.1	92.8	93.5	6	4	4	0	2	2	8	3	16	14	10	8	2	4	6	24	20	14	9	5	6	11	31	26	19	11	8	7	15	49	37	25	14	11	12	23	27.8	9.8	20.6	25.8	10.8
56	2015-03-05	92.5	91.2	92.2	91.4	94.1	92.8	93.5	6	4	4	0	2	2	8	3	16	14	10	8	2	4	6	24	20	14	9	5	6	11	31	26	19	11	8	7	15	49	37	25	14	11	12	23	27.8	9.8	20.6	25.8	10.8
31	2015-05-02	60.3	58.1	41.4	75.9	81.3	76.8	60.3	6	5	5	0	1	1	6	5	10	10	9	7	2	1	3	16	16	15	10	5	1	6	20	20	18	11	7	2	9	23	23	20	12	8	3	11	77.6	53.6	77.6	77.6	24
31	2015-05-02	60.3	58.1	41.4	75.9	81.3	76.8	60.3	6	5	5	0	1	1	6	5	10	10	9	7	2	1	3	16	16	15	10	5	1	6	20	20	18	11	7	2	9	23	23	20	12	8	3	11	77.6	53.6	77.6	77.6	24
31	2015-05-02	60.3	58.1	41.4	75.9	81.3	76.8	60.3	6	5	5	0	1	1	6	5	10	10	9	7	2	1	3	16	16	15	10	5	1	6	20	20	18	11	7	2	9	23	23	20	12	8	3	11	77.6	53.6	77.6	77.6	24
31	2015-05-02	60.3	58.1	41.4	75.9	81.3	76.8	60.3	6	5	5	0	1	1	6	5	10	10	9	7	2	1	3	16	16	15	10	5	1	6	20	20	18	11	7	2	9	23	23	20	12	8	3	11	77.6	53.6	77.6	77.6	24
31	2015-05-02	60.3	58.1	41.4	75.9	81.3	76.8	60.3	6	5	5	0	1	1	6	5	10	10	9	7	2	1	3	16	16	15	10	5	1	6	20	20	18	11	7	2	9	23	23	20	12	8	3	11	77.6	53.6	77.6	77.6	24
31	2015-05-02	60.3	58.1	41.4	75.9	81.3	76.8	60.3	6	5	5	0	1	1	6	5	10	10	9	7	2	1	3	16	16	15	10	5	1	6	20	20	18	11	7	2	9	23	23	20	12	8	3	11	77.6	53.6	77.6	77.6	24
31	2015-05-02	60.3	58.1	41.4	75.9	81.3	76.8	60.3	6	5	5	0	1	1	6	5	10	10	9	7	2	1	3	16	16	15	10	5	1	6	20	20	18	11	7	2	9	23	23	20	12	8	3	11	77.6	53.6	77.6	77.6	24
31	2015-05-02	60.3	58.1	41.4	75.9	81.3	76.8	60.3	6	5	5	0	1	1	6	5	10	10	9	7	2	1	3	16	16	15	10	5	1	6	20	20	18	11	7	2	9	23	23	20	12	8	3	11	77.6	53.6	77.6	77.6	24
31	2015-05-02	60.3	58.1	41.4	75.9	81.3	76.8	60.3	6	5	5	0	1	1	6	5	10	10	9	7	2	1	3	16	16	15	10	5	1	6	20	20	18	11	7	2	9	23	23	20	12	8	3	11	77.6	53.6	77.6	77.6	24
31	2015-05-02	60.3	58.1	41.4	75.9	81.3	76.8	60.3	6	5	5	0	1	1	6	5	10	10	9	7	2	1	3	16	16	15	10	5	1	6	20	20	18	11	7	2	9	23	23	20	12	8	3	11	77.6	53.6	77.6	77.6	24
31	2015-05-02	60.3	58.1	41.4	75.9	81.3	76.8	60.3	6	5	5	0	1	1	6	5	10	10	9	7	2	1	3	16	16	15	10	5	1	6	20	20	18	11	7	2	9	23	23	20	12	8	3	11	77.6	53.6	77.6	77.6	24
31	2015-05-02	60.3	58.1	41.4	75.9	81.3	76.8	60.3	6	5	5	0	1	1	6	5	10	10	9	7	2	1	3	16	16	15	10	5	1	6	20	20	18	11	7	2	9	23	23	20	12	8	3	11	77.6	53.6	77.6	77.6	24
31	2015-05-02	60.3	58.1	41.4	75.9	81.3	76.8	60.3	6	5	5	0	1	1	6	5	10	10	9	7	2	1	3	16	16	15	10	5	1	6	20	20	18	11	7	2	9	23	23	20	12	8	3	11	77.6	53.6	77.6	77.6	24
31	2015-05-02	60.3	58.1	41.4	75.9	81.3	76.8	60.3	6	5	5	0	1	1	6	5	10	10	9	7	2	1	3	16	16	15	10	5	1	6	20	20	18	11	7	2	9	23	23	20	12	8	3	11	77.6	53.6	77.6	77.6	24
31	2015-05-02	60.3	58.1	41.4	75.9	81.3	76.8	60.3	6	5	5	0	1	1	6	5	10	10	9	7	2	1	3	16	16	15	10	5	1	6	20	20	18	11	7	2	9	23	23	20	12	8	3	11	77.6	53.6	77.6	77.6	24
46	2015-05-17			17.6				46.6	9	8	3	5	1	6	10	5	16	15	12	5	7	3	10	23	22	16	6	10	6	16	28	26	18	7	11	8	19	34	31	22	10	12	9	21	81.8	4.2	57.4	81.8	53.2
46	2015-05-17			17.6				46.6	9	8	3	5	1	6	10	5	16	15	12	5	7	3	10	23	22	16	6	10	6	16	28	26	18	7	11	8	19	34	31	22	10	12	9	21	81.8	4.2	57.4	81.8	53.2
46	2015-05-17			17.6				46.6	9	8	3	5	1	6	10	5	16	15	12	5	7	3	10	23	22	16	6	10	6	16	28	26	18	7	11	8	19	34	31	22	10	12	9	21	81.8	4.2	57.4	81.8	53.2
46	2015-05-17			17.6				46.6	9	8	3	5	1	6	10	5	16	15	12	5	7	3	10	23	22	16	6	10	6	16	28	26	18	7	11	8	19	34	31	22	10	12	9	21	81.8	4.2	57.4	81.8	53.2
46	2015-05-17			17.6				46.6	9	8	3	5	1	6	10	5	16	15	12	5	7	3	10	23	22	16	6	10	6	16	28	26	18	7	11	8	19	34	31	22	10	12	9	21	81.8	4.2	57.4	81.8	53.2
46	2015-05-17			17.6				46.6	9	8	3	5	1	6	10	5	16	15	12	5	7	3	10	23	22	16	6	10	6	16	28	26	18	7	11	8	19	34	31	22	10	12	9	21	81.8	4.2	57.4	81.8	53.2
46	2015-05-17			17.6				46.6	9	8	3	5	1	6	10	5	16	15	12	5	7	3	10	23	22	16	6	10	6	16	28	26	18	7	11	8	19	34	31	22	10	12	9	21	81.8	4.2	57.4	81.8	53.2
46	2015-05-17			17.6				46.6	9	8	3	5	1	6	10	5	16	15	12	5	7	3	10	23	22	16	6	10	6	16	28	26	18	7	11	8	19	34	31	22	10	12	9	21	81.8	4.2	57.4	81.8	53.2
46	2015-05-17			17.6				46.6	9	8	3	5	1	6	10	5	16	15	12	5	7	3	10	23	22	16	6	10	6	16	28	26	18	7	11	8	19	34	31	22	10	12	9	21	81.8	4.2	57.4	81.8	53.2
46	2015-05-17			17.6				46.6	9	8	3	5	1	6	10	5	16	15	12	5	7	3	10	23	22	16	6	10	6	16	28	26	18	7	11	8	19	34	31	22	10	12	9	21	81.8	4.2	57.4	81.8	53.2
46	2015-05-17			17.6				46.6	9	8	3	5	1	6	10	5	16	15	12	5	7	3	10	23	22	16	6	10	6	16	28	26	18	7	11	8	19	34	31	22	10	12	9	21	81.8	4.2	57.4	81.8	53.2
46	2015-05-17			17.6				46.6	9	8	3	5	1	6	10	5	16	15	12	5	7	3	10	23	22	16	6	10	6	16	28	26	18	7	11	8	19	34	31	22	10	12	9	21	81.8	4.2	57.4	81.8	53.2
46	2015-05-17			17.6				46.6	9	8	3	5	1	6	10	5	16	15	12	5	7	3	10	23	22	16	6	10	6	16	28	26	18	7	11	8	19	34	31	22	10	12	9	21	81.8	4.2	57.4	81.8	53.2
46	2015-05-17			17.6				46.6	9	8	3	5	1	6	10	5	16	15	12	5	7	3	10	23	22	16	6	10	6	16	28	26	18	7	11	8	19	34	31	22	10	12	9	21	81.8	4.2	57.4	81.8	53.2
46	2015-05-17			17.6				46.6	9	8	3	5	1	6	10	5	16	15	12	5	7	3	10	23	22	16	6	10	6	16	28	26	18	7	11	8	19	34	31	22	10	12	9	21	81.8	4.2	57.4	81.8	53.2
36	2014-12-16	66.8	68.5	69.3	67.6	60.8	65.1	66.8	1	1	1	0	0	0	1	12	3	3	3	2	1	0	1	8	8	8	5	3	0	3	11	11	10	6	4	1	5	22	22	18	12	6	4	10	57.2	11.2	54.2	57.2	43
19	2014-12-16	69.1	69.1	69.3	68.4		68.4	69.1	1	1	1	0	0	0	1	12	3	3	3	2	1	0	1	7	7	7	5	2	0	2	9	9	9	6	3	0	3	15	15	15	12	3	0	3	41.4	11.2	41.4	41.4	30.2
83	2014-12-16	65.1	68.5	69.3	67.6	58.2	62.9	50	1	1	1	0	0	0	3	12	9	3	3	2	1	0	1	17	9	8	5	3	1	4	27	15	10	6	4	5	9	53	28	18	12	6	10	16	84.4	11.2	54.2	64.6	43
36	2014-12-16	66.8	68.5	69.3	67.6	60.8	65.1	66.8	1	1	1	0	0	0	1	12	3	3	3	2	1	0	1	8	8	8	5	3	0	3	11	11	10	6	4	1	5	22	22	18	12	6	4	10	57.2	11.2	54.2	57.2	43
19	2014-12-16	69.1	69.1	69.3	68.4		68.4	69.1	1	1	1	0	0	0	1	12	3	3	3	2	1	0	1	7	7	7	5	2	0	2	9	9	9	6	3	0	3	15	15	15	12	3	0	3	41.4	11.2	41.4	41.4	30.2
83	2014-12-16	65.1	68.5	69.3	67.6	58.2	62.9	50	1	1	1	0	0	0	3	12	9	3	3	2	1	0	1	17	9	8	5	3	1	4	27	15	10	6	4	5	9	53	28	18	12	6	10	16	84.4	11.2	54.2	64.6	43
36	2014-12-16	66.8	68.5	69.3	67.6	60.8	65.1	66.8	1	1	1	0	0	0	1	12	3	3	3	2	1	0	1	8	8	8	5	3	0	3	11	11	10	6	4	1	5	22	22	18	12	6	4	10	57.2	11.2	54.2	57.2	43
19	2014-12-16	69.1	69.1	69.3	68.4		68.4	69.1	1	1	1	0	0	0	1	12	3	3	3	2	1	0	1	7	7	7	5	2	0	2	9	9	9	6	3	0	3	15	15	15	12	3	0	3	41.4	11.2	41.4	41.4	30.2
83	2014-12-16	65.1	68.5	69.3	67.6	58.2	62.9	50	1	1	1	0	0	0	3	12	9	3	3	2	1	0	1	17	9	8	5	3	1	4	27	15	10	6	4	5	9	53	28	18	12	6	10	16	84.4	11.2	54.2	64.6	43
29	2015-01-14	80.9	81.2	84.9	77		77	80.9	2	2	1	1	0	1	2	1	3	3	3	1	2	0	2	8	8	8	1	7	0	7	14	14	13	4	9	1	10	24	24	23	11	12	1	13	7.2	3	7.2	7.2	4.2
29	2015-01-14	80.9	81.2	84.9	77		77	80.9	2	2	1	1	0	1	2	1	3	3	3	1	2	0	2	8	8	8	1	7	0	7	14	14	13	4	9	1	10	24	24	23	11	12	1	13	7.2	3	7.2	7.2	4.2
48	2015-01-14	77.4	81.2	84.9	77	69.8	73.4	76.2778	3	2	1	1	1	2	3	1	6	5	3	1	2	2	4	15	13	8	1	7	5	12	23	20	13	4	9	7	16	39	35	23	11	12	12	24	48.6	3	7.2	17	4.2
29	2015-01-14	80.9	81.2	84.9	77		77	80.9	2	2	1	1	0	1	2	1	3	3	3	1	2	0	2	8	8	8	1	7	0	7	14	14	13	4	9	1	10	24	24	23	11	12	1	13	7.2	3	7.2	7.2	4.2
29	2015-01-14	80.9	81.2	84.9	77		77	80.9	2	2	1	1	0	1	2	1	3	3	3	1	2	0	2	8	8	8	1	7	0	7	14	14	13	4	9	1	10	24	24	23	11	12	1	13	7.2	3	7.2	7.2	4.2
29	2015-01-14	80.9	81.2	84.9	77		77	80.9	2	2	1	1	0	1	2	1	3	3	3	1	2	0	2	8	8	8	1	7	0	7	14	14	13	4	9	1	10	24	24	23	11	12	1	13	7.2	3	7.2	7.2	4.2
48	2015-01-14	77.4	81.2	84.9	77	69.8	73.4	76.2778	3	2	1	1	1	2	3	1	6	5	3	1	2	2	4	15	13	8	1	7	5	12	23	20	13	4	9	7	16	39	35	23	11	12	12	24	48.6	3	7.2	17	4.2
29	2015-01-14	80.9	81.2	84.9	77		77	80.9	2	2	1	1	0	1	2	1	3	3	3	1	2	0	2	8	8	8	1	7	0	7	14	14	13	4	9	1	10	24	24	23	11	12	1	13	7.2	3	7.2	7.2	4.2
29	2015-01-14	80.9	81.2	84.9	77		77	80.9	2	2	1	1	0	1	2	1	3	3	3	1	2	0	2	8	8	8	1	7	0	7	14	14	13	4	9	1	10	24	24	23	11	12	1	13	7.2	3	7.2	7.2	4.2
29	2015-01-14	80.9	81.2	84.9	77		77	80.9	2	2	1	1	0	1	2	1	3	3	3	1	2	0	2	8	8	8	1	7	0	7	14	14	13	4	9	1	10	24	24	23	11	12	1	13	7.2	3	7.2	7.2	4.2
48	2015-01-14	77.4	81.2	84.9	77	69.8	73.4	76.2778	3	2	1	1	1	2	3	1	6	5	3	1	2	2	4	15	13	8	1	7	5	12	23	20	13	4	9	7	16	39	35	23	11	12	12	24	48.6	3	7.2	17	4.2
29	2015-01-14	80.9	81.2	84.9	77		77	80.9	2	2	1	1	0	1	2	1	3	3	3	1	2	0	2	8	8	8	1	7	0	7	14	14	13	4	9	1	10	24	24	23	11	12	1	13	7.2	3	7.2	7.2	4.2
43	2015-01-28	83.8	87	89	84.7	77.3	81	83.8	4	3	2	1	1	2	4	1	5	5	3	2	1	2	3	12	12	5	4	1	7	8	19	18	9	5	4	9	13	36	35	23	12	11	12	23	10.2	3	6	10.2	3
43	2015-01-28	83.8	87	89	84.7	77.3	81	83.8	4	3	2	1	1	2	4	1	5	5	3	2	1	2	3	12	12	5	4	1	7	8	19	18	9	5	4	9	13	36	35	23	12	11	12	23	10.2	3	6	10.2	3
43	2015-01-28	83.8	87	89	84.7	77.3	81	83.8	4	3	2	1	1	2	4	1	5	5	3	2	1	2	3	12	12	5	4	1	7	8	19	18	9	5	4	9	13	36	35	23	12	11	12	23	10.2	3	6	10.2	3
43	2015-01-28	83.8	87	89	84.7	77.3	81	83.8	4	3	2	1	1	2	4	1	5	5	3	2	1	2	3	12	12	5	4	1	7	8	19	18	9	5	4	9	13	36	35	23	12	11	12	23	10.2	3	6	10.2	3
43	2015-01-28	83.8	87	89	84.7	77.3	81	83.8	4	3	2	1	1	2	4	1	5	5	3	2	1	2	3	12	12	5	4	1	7	8	19	18	9	5	4	9	13	36	35	23	12	11	12	23	10.2	3	6	10.2	3
28	2015-02-11	90	90	90.9	88.9		88.9	90	3	3	1	2	0	2	3	2	5	5	5	3	2	0	2	10	10	10	6	4	0	4	12	12	12	7	5	0	5	21	21	21	9	12	0	12	16.2	13.2	16.2	16.2	3
28	2015-02-11	90	90	90.9	88.9		88.9	90	3	3	1	2	0	2	3	2	5	5	5	3	2	0	2	10	10	10	6	4	0	4	12	12	12	7	5	0	5	21	21	21	9	12	0	12	16.2	13.2	16.2	16.2	3
57	2015-02-11	88.3	90	90.9	88.9	84.7	86.8	85.3	4	3	1	2	1	3	5	2	8	6	5	3	2	1	3	18	11	10	6	4	1	5	26	16	12	7	5	4	9	45	32	21	9	12	11	23	23.4	13.2	16.2	19.2	3
28	2015-02-11	90	90	90.9	88.9		88.9	90	3	3	1	2	0	2	3	2	5	5	5	3	2	0	2	10	10	10	6	4	0	4	12	12	12	7	5	0	5	21	21	21	9	12	0	12	16.2	13.2	16.2	16.2	3
28	2015-02-11	90	90	90.9	88.9		88.9	90	3	3	1	2	0	2	3	2	5	5	5	3	2	0	2	10	10	10	6	4	0	4	12	12	12	7	5	0	5	21	21	21	9	12	0	12	16.2	13.2	16.2	16.2	3
57	2015-02-11	88.3	90	90.9	88.9	84.7	86.8	85.3	4	3	1	2	1	3	5	2	8	6	5	3	2	1	3	18	11	10	6	4	1	5	26	16	12	7	5	4	9	45	32	21	9	12	11	23	23.4	13.2	16.2	19.2	3
28	2015-02-11	90	90	90.9	88.9		88.9	90	3	3	1	2	0	2	3	2	5	5	5	3	2	0	2	10	10	10	6	4	0	4	12	12	12	7	5	0	5	21	21	21	9	12	0	12	16.2	13.2	16.2	16.2	3
28	2015-02-11	90	90	90.9	88.9		88.9	90	3	3	1	2	0	2	3	2	5	5	5	3	2	0	2	10	10	10	6	4	0	4	12	12	12	7	5	0	5	21	21	21	9	12	0	12	16.2	13.2	16.2	16.2	3
57	2015-02-11	88.3	90	90.9	88.9	84.7	86.8	85.3	4	3	1	2	1	3	5	2	8	6	5	3	2	1	3	18	11	10	6	4	1	5	26	16	12	7	5	4	9	45	32	21	9	12	11	23	23.4	13.2	16.2	19.2	3
28	2015-02-25	91.1	91.1	91.3	90.9		90.9	91.1	4	4	3	1	0	1	4	2	9	9	9	6	3	0	3	15	15	15	9	6	0	6	19	19	19	12	7	0	7	23	23	23	14	9	0	9	21.6	8.4	21.6	21.6	13.2
42	2015-02-25	90.4	91.1	91.3	90.9	88.9	89.9	90.4	6	4	3	1	2	3	6	2	11	11	9	6	3	2	5	19	19	15	9	6	4	10	24	24	19	12	7	5	12	35	35	23	14	9	12	21	24.6	8.4	21.6	24.6	13.2
71	2015-02-25	90.4	91.1	91.3	90.9	88.9	89.9	86.5	6	4	3	1	2	3	8	2	14	11	9	6	3	2	5	27	19	15	9	6	4	10	38	24	19	12	7	5	12	59	35	23	14	9	12	21	31.8	8.4	21.6	24.6	13.2
28	2015-02-25	91.1	91.1	91.3	90.9		90.9	91.1	4	4	3	1	0	1	4	2	9	9	9	6	3	0	3	15	15	15	9	6	0	6	19	19	19	12	7	0	7	23	23	23	14	9	0	9	21.6	8.4	21.6	21.6	13.2
42	2015-02-25	90.4	91.1	91.3	90.9	88.9	89.9	90.4	6	4	3	1	2	3	6	2	11	11	9	6	3	2	5	19	19	15	9	6	4	10	24	24	19	12	7	5	12	35	35	23	14	9	12	21	24.6	8.4	21.6	24.6	13.2
71	2015-02-25	90.4	91.1	91.3	90.9	88.9	89.9	86.5	6	4	3	1	2	3	8	2	14	11	9	6	3	2	5	27	19	15	9	6	4	10	38	24	19	12	7	5	12	59	35	23	14	9	12	21	31.8	8.4	21.6	24.6	13.2
28	2015-02-25	91.1	91.1	91.3	90.9		90.9	91.1	4	4	3	1	0	1	4	2	9	9	9	6	3	0	3	15	15	15	9	6	0	6	19	19	19	12	7	0	7	23	23	23	14	9	0	9	21.6	8.4	21.6	21.6	13.2
42	2015-02-25	90.4	91.1	91.3	90.9	88.9	89.9	90.4	6	4	3	1	2	3	6	2	11	11	9	6	3	2	5	19	19	15	9	6	4	10	24	24	19	12	7	5	12	35	35	23	14	9	12	21	24.6	8.4	21.6	24.6	13.2
71	2015-02-25	90.4	91.1	91.3	90.9	88.9	89.9	86.5	6	4	3	1	2	3	8	2	14	11	9	6	3	2	5	27	19	15	9	6	4	10	38	24	19	12	7	5	12	59	35	23	14	9	12	21	31.8	8.4	21.6	24.6	13.2
28	2015-03-11	91	91	90.7	91.3		91.3	91	5	5	2	3	0	3	5	3	14	14	14	8	6	0	6	17	17	17	8	9	0	9	21	21	21	9	12	0	12	27	27	27	13	14	0	14	28	19.6	28	28	8.4
42	2015-03-11	91	91	90.7	91.3	90.9	91.1	91	6	5	2	3	1	4	6	3	17	17	14	8	6	3	9	23	23	17	8	9	6	15	28	28	21	9	12	7	19	36	36	27	13	14	9	23	41.2	19.6	28	41.2	8.4
55	2015-03-11	91	91	90.7	91.3	90.9	91.1	90.5	6	5	2	3	1	4	7	3	18	17	14	8	6	3	9	26	23	17	8	9	6	15	32	28	21	9	12	7	19	47	36	27	13	14	9	23	44.2	19.6	28	41.2	8.4
85	2015-03-11	91	91	90.7	91.3	90.9	91.1	87.2	6	5	2	3	1	4	10	3	22	17	14	8	6	3	9	35	23	17	8	9	6	15	47	28	21	9	12	7	19	72	36	27	13	14	9	23	51.4	19.6	28	41.2	8.4
28	2015-03-11	91	91	90.7	91.3		91.3	91	5	5	2	3	0	3	5	3	14	14	14	8	6	0	6	17	17	17	8	9	0	9	21	21	21	9	12	0	12	27	27	27	13	14	0	14	28	19.6	28	28	8.4
42	2015-03-11	91	91	90.7	91.3	90.9	91.1	91	6	5	2	3	1	4	6	3	17	17	14	8	6	3	9	23	23	17	8	9	6	15	28	28	21	9	12	7	19	36	36	27	13	14	9	23	41.2	19.6	28	41.2	8.4
55	2015-03-11	91	91	90.7	91.3	90.9	91.1	90.5	6	5	2	3	1	4	7	3	18	17	14	8	6	3	9	26	23	17	8	9	6	15	32	28	21	9	12	7	19	47	36	27	13	14	9	23	44.2	19.6	28	41.2	8.4
85	2015-03-11	91	91	90.7	91.3	90.9	91.1	87.2	6	5	2	3	1	4	10	3	22	17	14	8	6	3	9	35	23	17	8	9	6	15	47	28	21	9	12	7	19	72	36	27	13	14	9	23	51.4	19.6	28	41.2	8.4
28	2015-03-11	91	91	90.7	91.3		91.3	91	5	5	2	3	0	3	5	3	14	14	14	8	6	0	6	17	17	17	8	9	0	9	21	21	21	9	12	0	12	27	27	27	13	14	0	14	28	19.6	28	28	8.4
42	2015-03-11	91	91	90.7	91.3	90.9	91.1	91	6	5	2	3	1	4	6	3	17	17	14	8	6	3	9	23	23	17	8	9	6	15	28	28	21	9	12	7	19	36	36	27	13	14	9	23	41.2	19.6	28	41.2	8.4
55	2015-03-11	91	91	90.7	91.3	90.9	91.1	90.5	6	5	2	3	1	4	7	3	18	17	14	8	6	3	9	26	23	17	8	9	6	15	32	28	21	9	12	7	19	47	36	27	13	14	9	23	44.2	19.6	28	41.2	8.4
85	2015-03-11	91	91	90.7	91.3	90.9	91.1	87.2	6	5	2	3	1	4	10	3	22	17	14	8	6	3	9	35	23	17	8	9	6	15	47	28	21	9	12	7	19	72	36	27	13	14	9	23	51.4	19.6	28	41.2	8.4
42	2015-03-25	89.6	88.7	86.7	90.9	91.3	91.1	89.6	8	5	3	2	3	5	8	3	18	18	12	4	8	6	14	26	26	17	9	8	9	17	33	33	21	12	9	12	21	41	41	27	14	13	14	27	47.8	19.8	39.4	47.8	19.6
56	2015-03-25	89.6	88.7	86.7	90.9	91.3	91.1	89.9	8	5	3	2	3	5	9	3	21	18	12	4	8	6	14	32	26	17	9	8	9	17	40	33	21	12	9	12	21	50	41	27	14	13	14	27	61	19.8	39.4	47.8	19.6
69	2015-03-25	89.6	88.7	86.7	90.9	91.3	91.1	89.8	8	5	3	2	3	5	10	3	22	18	12	4	8	6	14	35	26	17	9	8	9	17	44	33	21	12	9	12	21	61	41	27	14	13	14	27	64	19.8	39.4	47.8	19.6
99	2015-03-25	89.6	88.7	86.7	90.9	91.3	91.1	87.1	8	5	3	2	3	5	13	3	26	18	12	4	8	6	14	44	26	17	9	8	9	17	59	33	21	12	9	12	21	86	41	27	14	13	14	27	71.2	19.8	39.4	47.8	19.6
42	2015-03-25	89.6	88.7	86.7	90.9	91.3	91.1	89.6	8	5	3	2	3	5	8	3	18	18	12	4	8	6	14	26	26	17	9	8	9	17	33	33	21	12	9	12	21	41	41	27	14	13	14	27	47.8	19.8	39.4	47.8	19.6
56	2015-03-25	89.6	88.7	86.7	90.9	91.3	91.1	89.9	8	5	3	2	3	5	9	3	21	18	12	4	8	6	14	32	26	17	9	8	9	17	40	33	21	12	9	12	21	50	41	27	14	13	14	27	61	19.8	39.4	47.8	19.6
69	2015-03-25	89.6	88.7	86.7	90.9	91.3	91.1	89.8	8	5	3	2	3	5	10	3	22	18	12	4	8	6	14	35	26	17	9	8	9	17	44	33	21	12	9	12	21	61	41	27	14	13	14	27	64	19.8	39.4	47.8	19.6
99	2015-03-25	89.6	88.7	86.7	90.9	91.3	91.1	87.1	8	5	3	2	3	5	13	3	26	18	12	4	8	6	14	44	26	17	9	8	9	17	59	33	21	12	9	12	21	86	41	27	14	13	14	27	71.2	19.8	39.4	47.8	19.6
42	2015-03-25	89.6	88.7	86.7	90.9	91.3	91.1	89.6	8	5	3	2	3	5	8	3	18	18	12	4	8	6	14	26	26	17	9	8	9	17	33	33	21	12	9	12	21	41	41	27	14	13	14	27	47.8	19.8	39.4	47.8	19.6
56	2015-03-25	89.6	88.7	86.7	90.9	91.3	91.1	89.9	8	5	3	2	3	5	9	3	21	18	12	4	8	6	14	32	26	17	9	8	9	17	40	33	21	12	9	12	21	50	41	27	14	13	14	27	61	19.8	39.4	47.8	19.6
69	2015-03-25	89.6	88.7	86.7	90.9	91.3	91.1	89.8	8	5	3	2	3	5	10	3	22	18	12	4	8	6	14	35	26	17	9	8	9	17	44	33	21	12	9	12	21	61	41	27	14	13	14	27	64	19.8	39.4	47.8	19.6
99	2015-03-25	89.6	88.7	86.7	90.9	91.3	91.1	87.1	8	5	3	2	3	5	13	3	26	18	12	4	8	6	14	44	26	17	9	8	9	17	59	33	21	12	9	12	21	86	41	27	14	13	14	27	71.2	19.8	39.4	47.8	19.6
20	2015-04-14	86	86	86	85.8		85.8	86	4	4	1	3	0	3	4	4	7	7	7	3	4	0	4	9	9	9	5	4	0	4	14	14	14	8	6	0	6	16	16	16	10	6	0	6	14.4	13.4	14.4	14.4	1
20	2015-04-14	86	86	86	85.8		85.8	86	4	4	1	3	0	3	4	4	7	7	7	3	4	0	4	9	9	9	5	4	0	4	14	14	14	8	6	0	6	16	16	16	10	6	0	6	14.4	13.4	14.4	14.4	1
20	2015-04-14	86	86	86	85.8		85.8	86	4	4	1	3	0	3	4	4	7	7	7	3	4	0	4	9	9	9	5	4	0	4	14	14	14	8	6	0	6	16	16	16	10	6	0	6	14.4	13.4	14.4	14.4	1
20	2015-04-14	86	86	86	85.8		85.8	86	4	4	1	3	0	3	4	4	7	7	7	3	4	0	4	9	9	9	5	4	0	4	14	14	14	8	6	0	6	16	16	16	10	6	0	6	14.4	13.4	14.4	14.4	1
20	2015-04-14	86	86	86	85.8		85.8	86	4	4	1	3	0	3	4	4	7	7	7	3	4	0	4	9	9	9	5	4	0	4	14	14	14	8	6	0	6	16	16	16	10	6	0	6	14.4	13.4	14.4	14.4	1
20	2015-04-14	86	86	86	85.8		85.8	86	4	4	1	3	0	3	4	4	7	7	7	3	4	0	4	9	9	9	5	4	0	4	14	14	14	8	6	0	6	16	16	16	10	6	0	6	14.4	13.4	14.4	14.4	1
20	2015-04-14	86	86	86	85.8		85.8	86	4	4	1	3	0	3	4	4	7	7	7	3	4	0	4	9	9	9	5	4	0	4	14	14	14	8	6	0	6	16	16	16	10	6	0	6	14.4	13.4	14.4	14.4	1
20	2015-04-14	86	86	86	85.8		85.8	86	4	4	1	3	0	3	4	4	7	7	7	3	4	0	4	9	9	9	5	4	0	4	14	14	14	8	6	0	6	16	16	16	10	6	0	6	14.4	13.4	14.4	14.4	1
20	2015-04-14	86	86	86	85.8		85.8	86	4	4	1	3	0	3	4	4	7	7	7	3	4	0	4	9	9	9	5	4	0	4	14	14	14	8	6	0	6	16	16	16	10	6	0	6	14.4	13.4	14.4	14.4	1
20	2015-04-14	86	86	86	85.8		85.8	86	4	4	1	3	0	3	4	4	7	7	7	3	4	0	4	9	9	9	5	4	0	4	14	14	14	8	6	0	6	16	16	16	10	6	0	6	14.4	13.4	14.4	14.4	1
20	2015-04-14	86	86	86	85.8		85.8	86	4	4	1	3	0	3	4	4	7	7	7	3	4	0	4	9	9	9	5	4	0	4	14	14	14	8	6	0	6	16	16	16	10	6	0	6	14.4	13.4	14.4	14.4	1
20	2015-04-14	86	86	86	85.8		85.8	86	4	4	1	3	0	3	4	4	7	7	7	3	4	0	4	9	9	9	5	4	0	4	14	14	14	8	6	0	6	16	16	16	10	6	0	6	14.4	13.4	14.4	14.4	1
30	2015-04-24	84.7	84.7	82.3	86.6	90.6	86.6	84.7	7	6	3	3	1	4	7	4	12	12	10	6	4	2	6	16	16	14	10	4	2	6	22	22	20	11	9	2	11	24	24	22	11	11	2	13	32.6	28.2	32.6	32.6	4.4
30	2015-04-24	84.7	84.7	82.3	86.6	90.6	86.6	84.7	7	6	3	3	1	4	7	4	12	12	10	6	4	2	6	16	16	14	10	4	2	6	22	22	20	11	9	2	11	24	24	22	11	11	2	13	32.6	28.2	32.6	32.6	4.4
30	2015-04-24	84.7	84.7	82.3	86.6	90.6	86.6	84.7	7	6	3	3	1	4	7	4	12	12	10	6	4	2	6	16	16	14	10	4	2	6	22	22	20	11	9	2	11	24	24	22	11	11	2	13	32.6	28.2	32.6	32.6	4.4
30	2015-04-24	84.7	84.7	82.3	86.6	90.6	86.6	84.7	7	6	3	3	1	4	7	4	12	12	10	6	4	2	6	16	16	14	10	4	2	6	22	22	20	11	9	2	11	24	24	22	11	11	2	13	32.6	28.2	32.6	32.6	4.4
30	2015-04-24	84.7	84.7	82.3	86.6	90.6	86.6	84.7	7	6	3	3	1	4	7	4	12	12	10	6	4	2	6	16	16	14	10	4	2	6	22	22	20	11	9	2	11	24	24	22	11	11	2	13	32.6	28.2	32.6	32.6	4.4
30	2015-04-24	84.7	84.7	82.3	86.6	90.6	86.6	84.7	7	6	3	3	1	4	7	4	12	12	10	6	4	2	6	16	16	14	10	4	2	6	22	22	20	11	9	2	11	24	24	22	11	11	2	13	32.6	28.2	32.6	32.6	4.4
30	2015-04-24	84.7	84.7	82.3	86.6	90.6	86.6	84.7	7	6	3	3	1	4	7	4	12	12	10	6	4	2	6	16	16	14	10	4	2	6	22	22	20	11	9	2	11	24	24	22	11	11	2	13	32.6	28.2	32.6	32.6	4.4
30	2015-04-24	84.7	84.7	82.3	86.6	90.6	86.6	84.7	7	6	3	3	1	4	7	4	12	12	10	6	4	2	6	16	16	14	10	4	2	6	22	22	20	11	9	2	11	24	24	22	11	11	2	13	32.6	28.2	32.6	32.6	4.4
30	2015-04-24	84.7	84.7	82.3	86.6	90.6	86.6	84.7	7	6	3	3	1	4	7	4	12	12	10	6	4	2	6	16	16	14	10	4	2	6	22	22	20	11	9	2	11	24	24	22	11	11	2	13	32.6	28.2	32.6	32.6	4.4
30	2015-04-24	84.7	84.7	82.3	86.6	90.6	86.6	84.7	7	6	3	3	1	4	7	4	12	12	10	6	4	2	6	16	16	14	10	4	2	6	22	22	20	11	9	2	11	24	24	22	11	11	2	13	32.6	28.2	32.6	32.6	4.4
30	2015-04-24	84.7	84.7	82.3	86.6	90.6	86.6	84.7	7	6	3	3	1	4	7	4	12	12	10	6	4	2	6	16	16	14	10	4	2	6	22	22	20	11	9	2	11	24	24	22	11	11	2	13	32.6	28.2	32.6	32.6	4.4
30	2015-04-24	84.7	84.7	82.3	86.6	90.6	86.6	84.7	7	6	3	3	1	4	7	4	12	12	10	6	4	2	6	16	16	14	10	4	2	6	22	22	20	11	9	2	11	24	24	22	11	11	2	13	32.6	28.2	32.6	32.6	4.4
46	2015-05-10	80.1	77	72	82.4	86.3	84.6	80.6	11	9	6	3	2	5	13	5	19	16	12	7	5	4	9	25	22	17	8	9	5	14	31	27	18	8	10	9	19	35	31	20	9	11	11	22	78.6	46	66.4	78.6	20.4
46	2015-05-10	80.1	77	72	82.4	86.3	84.6	80.6	11	9	6	3	2	5	13	5	19	16	12	7	5	4	9	25	22	17	8	9	5	14	31	27	18	8	10	9	19	35	31	20	9	11	11	22	78.6	46	66.4	78.6	20.4
46	2015-05-10	80.1	77	72	82.4	86.3	84.6	80.6	11	9	6	3	2	5	13	5	19	16	12	7	5	4	9	25	22	17	8	9	5	14	31	27	18	8	10	9	19	35	31	20	9	11	11	22	78.6	46	66.4	78.6	20.4
46	2015-05-10	80.1	77	72	82.4	86.3	84.6	80.6	11	9	6	3	2	5	13	5	19	16	12	7	5	4	9	25	22	17	8	9	5	14	31	27	18	8	10	9	19	35	31	20	9	11	11	22	78.6	46	66.4	78.6	20.4
46	2015-05-10	80.1	77	72	82.4	86.3	84.6	80.6	11	9	6	3	2	5	13	5	19	16	12	7	5	4	9	25	22	17	8	9	5	14	31	27	18	8	10	9	19	35	31	20	9	11	11	22	78.6	46	66.4	78.6	20.4
46	2015-05-10	80.1	77	72	82.4	86.3	84.6	80.6	11	9	6	3	2	5	13	5	19	16	12	7	5	4	9	25	22	17	8	9	5	14	31	27	18	8	10	9	19	35	31	20	9	11	11	22	78.6	46	66.4	78.6	20.4
46	2015-05-10	80.1	77	72	82.4	86.3	84.6	80.6	11	9	6	3	2	5	13	5	19	16	12	7	5	4	9	25	22	17	8	9	5	14	31	27	18	8	10	9	19	35	31	20	9	11	11	22	78.6	46	66.4	78.6	20.4
46	2015-05-10	80.1	77	72	82.4	86.3	84.6	80.6	11	9	6	3	2	5	13	5	19	16	12	7	5	4	9	25	22	17	8	9	5	14	31	27	18	8	10	9	19	35	31	20	9	11	11	22	78.6	46	66.4	78.6	20.4
46	2015-05-10	80.1	77	72	82.4	86.3	84.6	80.6	11	9	6	3	2	5	13	5	19	16	12	7	5	4	9	25	22	17	8	9	5	14	31	27	18	8	10	9	19	35	31	20	9	11	11	22	78.6	46	66.4	78.6	20.4
31	2015-05-25			72.5				72.8	6	6	0	6	0	6	6	5	13	13	13	5	8	0	8	17	17	16	7	9	1	10	20	20	19	10	9	1	10	24	24	22	12	10	2	12	50.6	4.6	50.6	50.6	46
61	2015-05-25			72.5				78.6	9	6	0	6	3	9	13	5	25	18	13	5	8	5	13	33	25	16	7	9	9	18	42	29	19	10	9	10	19	48	33	22	12	10	11	21	83.2	4.6	50.6	71	46
61	2015-05-25			72.5				78.6	9	6	0	6	3	9	13	5	25	18	13	5	8	5	13	33	25	16	7	9	9	18	42	29	19	10	9	10	19	48	33	22	12	10	11	21	83.2	4.6	50.6	71	46
31	2015-05-25			72.5				72.8	6	6	0	6	0	6	6	5	13	13	13	5	8	0	8	17	17	16	7	9	1	10	20	20	19	10	9	1	10	24	24	22	12	10	2	12	50.6	4.6	50.6	50.6	46
61	2015-05-25			72.5				78.6	9	6	0	6	3	9	13	5	25	18	13	5	8	5	13	33	25	16	7	9	9	18	42	29	19	10	9	10	19	48	33	22	12	10	11	21	83.2	4.6	50.6	71	46
61	2015-05-25			72.5				78.6	9	6	0	6	3	9	13	5	25	18	13	5	8	5	13	33	25	16	7	9	9	18	42	29	19	10	9	10	19	48	33	22	12	10	11	21	83.2	4.6	50.6	71	46
31	2015-05-25			72.5				72.8	6	6	0	6	0	6	6	5	13	13	13	5	8	0	8	17	17	16	7	9	1	10	20	20	19	10	9	1	10	24	24	22	12	10	2	12	50.6	4.6	50.6	50.6	46
61	2015-05-25			72.5				78.6	9	6	0	6	3	9	13	5	25	18	13	5	8	5	13	33	25	16	7	9	9	18	42	29	19	10	9	10	19	48	33	22	12	10	11	21	83.2	4.6	50.6	71	46
61	2015-05-25			72.5				78.6	9	6	0	6	3	9	13	5	25	18	13	5	8	5	13	33	25	16	7	9	9	18	42	29	19	10	9	10	19	48	33	22	12	10	11	21	83.2	4.6	50.6	71	46
28	2014-04-07	57.8	57.8	58.4	57.2		57.2	57.8	14	14	8	6	0	6	14	4	22	22	22	12	10	0	10	25	25	25	14	11	0	11	28	28	28	14	14	0	14	28	28	28	14	14	0	14	37.8	19.4	37.8	37.8	18.4
28	2014-04-07	57.8	57.8	58.4	57.2		57.2	57.8	14	14	8	6	0	6	14	4	22	22	22	12	10	0	10	25	25	25	14	11	0	11	28	28	28	14	14	0	14	28	28	28	14	14	0	14	37.8	19.4	37.8	37.8	18.4
28	2014-04-07	57.8	57.8	58.4	57.2		57.2	57.8	14	14	8	6	0	6	14	4	22	22	22	12	10	0	10	25	25	25	14	11	0	11	28	28	28	14	14	0	14	28	28	28	14	14	0	14	37.8	19.4	37.8	37.8	18.4
28	2014-04-07	57.8	57.8	58.4	57.2		57.2	57.8	14	14	8	6	0	6	14	4	22	22	22	12	10	0	10	25	25	25	14	11	0	11	28	28	28	14	14	0	14	28	28	28	14	14	0	14	37.8	19.4	37.8	37.8	18.4
28	2014-04-07	57.8	57.8	58.4	57.2		57.2	57.8	14	14	8	6	0	6	14	4	22	22	22	12	10	0	10	25	25	25	14	11	0	11	28	28	28	14	14	0	14	28	28	28	14	14	0	14	37.8	19.4	37.8	37.8	18.4
28	2014-04-07	57.8	57.8	58.4	57.2		57.2	57.8	14	14	8	6	0	6	14	4	22	22	22	12	10	0	10	25	25	25	14	11	0	11	28	28	28	14	14	0	14	28	28	28	14	14	0	14	37.8	19.4	37.8	37.8	18.4
28	2014-04-07	57.8	57.8	58.4	57.2		57.2	57.8	14	14	8	6	0	6	14	4	22	22	22	12	10	0	10	25	25	25	14	11	0	11	28	28	28	14	14	0	14	28	28	28	14	14	0	14	37.8	19.4	37.8	37.8	18.4
28	2014-04-07	57.8	57.8	58.4	57.2		57.2	57.8	14	14	8	6	0	6	14	4	22	22	22	12	10	0	10	25	25	25	14	11	0	11	28	28	28	14	14	0	14	28	28	28	14	14	0	14	37.8	19.4	37.8	37.8	18.4
28	2014-04-07	57.8	57.8	58.4	57.2		57.2	57.8	14	14	8	6	0	6	14	4	22	22	22	12	10	0	10	25	25	25	14	11	0	11	28	28	28	14	14	0	14	28	28	28	14	14	0	14	37.8	19.4	37.8	37.8	18.4
28	2014-04-07	57.8	57.8	58.4	57.2		57.2	57.8	14	14	8	6	0	6	14	4	22	22	22	12	10	0	10	25	25	25	14	11	0	11	28	28	28	14	14	0	14	28	28	28	14	14	0	14	37.8	19.4	37.8	37.8	18.4
42	2014-04-21	53.1	51.1	44.4	58.3	57.2	57.8	53.1	21	15	7	8	6	14	21	4	33	33	23	11	12	10	22	37	37	26	12	14	11	25	41	41	27	13	14	14	28	42	42	28	14	14	14	28	137.6	99.8	119.2	137.6	19.4
42	2014-04-21	53.1	51.1	44.4	58.3	57.2	57.8	53.1	21	15	7	8	6	14	21	4	33	33	23	11	12	10	22	37	37	26	12	14	11	25	41	41	27	13	14	14	28	42	42	28	14	14	14	28	137.6	99.8	119.2	137.6	19.4
42	2014-04-21	53.1	51.1	44.4	58.3	57.2	57.8	53.1	21	15	7	8	6	14	21	4	33	33	23	11	12	10	22	37	37	26	12	14	11	25	41	41	27	13	14	14	28	42	42	28	14	14	14	28	137.6	99.8	119.2	137.6	19.4
42	2014-04-21	53.1	51.1	44.4	58.3	57.2	57.8	53.1	21	15	7	8	6	14	21	4	33	33	23	11	12	10	22	37	37	26	12	14	11	25	41	41	27	13	14	14	28	42	42	28	14	14	14	28	137.6	99.8	119.2	137.6	19.4
42	2014-04-21	53.1	51.1	44.4	58.3	57.2	57.8	53.1	21	15	7	8	6	14	21	4	33	33	23	11	12	10	22	37	37	26	12	14	11	25	41	41	27	13	14	14	28	42	42	28	14	14	14	28	137.6	99.8	119.2	137.6	19.4
42	2014-04-21	53.1	51.1	44.4	58.3	57.2	57.8	53.1	21	15	7	8	6	14	21	4	33	33	23	11	12	10	22	37	37	26	12	14	11	25	41	41	27	13	14	14	28	42	42	28	14	14	14	28	137.6	99.8	119.2	137.6	19.4
42	2014-04-21	53.1	51.1	44.4	58.3	57.2	57.8	53.1	21	15	7	8	6	14	21	4	33	33	23	11	12	10	22	37	37	26	12	14	11	25	41	41	27	13	14	14	28	42	42	28	14	14	14	28	137.6	99.8	119.2	137.6	19.4
42	2014-04-21	53.1	51.1	44.4	58.3	57.2	57.8	53.1	21	15	7	8	6	14	21	4	33	33	23	11	12	10	22	37	37	26	12	14	11	25	41	41	27	13	14	14	28	42	42	28	14	14	14	28	137.6	99.8	119.2	137.6	19.4
42	2014-04-21	53.1	51.1	44.4	58.3	57.2	57.8	53.1	21	15	7	8	6	14	21	4	33	33	23	11	12	10	22	37	37	26	12	14	11	25	41	41	27	13	14	14	28	42	42	28	14	14	14	28	137.6	99.8	119.2	137.6	19.4
28	2014-05-05			30.3				37.4	13	13	6	7	0	7	13	5	19	19	19	8	11	0	11	22	22	22	10	12	0	12	26	26	26	13	13	0	13	28	28	28	14	14	0	14	159.8	60	159.8	159.8	99.8
28	2014-05-05			30.3				37.4	13	13	6	7	0	7	13	5	19	19	19	8	11	0	11	22	22	22	10	12	0	12	26	26	26	13	13	0	13	28	28	28	14	14	0	14	159.8	60	159.8	159.8	99.8
28	2014-05-05			30.3				37.4	13	13	6	7	0	7	13	5	19	19	19	8	11	0	11	22	22	22	10	12	0	12	26	26	26	13	13	0	13	28	28	28	14	14	0	14	159.8	60	159.8	159.8	99.8
56	2014-05-05			30.3				47.4	21	13	6	7	8	15	27	5	41	31	19	8	11	12	23	47	36	22	10	12	14	26	54	40	26	13	13	14	27	56	42	28	14	14	14	28	197.6	60	159.8	179.2	99.8
56	2014-05-05			30.3				47.4	21	13	6	7	8	15	27	5	41	31	19	8	11	12	23	47	36	22	10	12	14	26	54	40	26	13	13	14	27	56	42	28	14	14	14	28	197.6	60	159.8	179.2	99.8
56	2014-05-05			30.3				47.4	21	13	6	7	8	15	27	5	41	31	19	8	11	12	23	47	36	22	10	12	14	26	54	40	26	13	13	14	27	56	42	28	14	14	14	28	197.6	60	159.8	179.2	99.8
56	2014-05-05			30.3				47.4	21	13	6	7	8	15	27	5	41	31	19	8	11	12	23	47	36	22	10	12	14	26	54	40	26	13	13	14	27	56	42	28	14	14	14	28	197.6	60	159.8	179.2	99.8
56	2014-05-05			30.3				47.4	21	13	6	7	8	15	27	5	41	31	19	8	11	12	23	47	36	22	10	12	14	26	54	40	26	13	13	14	27	56	42	28	14	14	14	28	197.6	60	159.8	179.2	99.8
56	2014-05-05			30.3				47.4	21	13	6	7	8	15	27	5	41	31	19	8	11	12	23	47	36	22	10	12	14	26	54	40	26	13	13	14	27	56	42	28	14	14	14	28	197.6	60	159.8	179.2	99.8
28	2014-05-19			21.6				26	12	12	6	6	0	6	12	5	17	17	17	9	8	0	8	21	21	21	11	10	0	10	25	25	25	12	13	0	13	26	26	26	12	14	0	14	90.8	30.8	90.8	90.8	60
28	2014-05-19			21.6				26	12	12	6	6	0	6	12	5	17	17	17	9	8	0	8	21	21	21	11	10	0	10	25	25	25	12	13	0	13	26	26	26	12	14	0	14	90.8	30.8	90.8	90.8	60
28	2014-05-19			21.6				26	12	12	6	6	0	6	12	5	17	17	17	9	8	0	8	21	21	21	11	10	0	10	25	25	25	12	13	0	13	26	26	26	12	14	0	14	90.8	30.8	90.8	90.8	60
70	2014-05-19			21.6				42.3	19	12	6	6	7	13	33	5	50	28	17	9	8	11	19	58	33	21	11	10	12	22	66	38	25	12	13	13	26	68	40	26	12	14	14	28	228.4	30.8	90.8	190.6	60
70	2014-05-19			21.6				42.3	19	12	6	6	7	13	33	5	50	28	17	9	8	11	19	58	33	21	11	10	12	22	66	38	25	12	13	13	26	68	40	26	12	14	14	28	228.4	30.8	90.8	190.6	60
70	2014-05-19			21.6				42.3	19	12	6	6	7	13	33	5	50	28	17	9	8	11	19	58	33	21	11	10	12	22	66	38	25	12	13	13	26	68	40	26	12	14	14	28	228.4	30.8	90.8	190.6	60
29	2014-06-03			20.2				20.9	6	6	0	6	0	6	6	6	11	11	11	2	9	0	9	13	13	13	2	11	0	11	17	17	17	5	12	0	12	21	21	21	8	13	0	13	44.6	13.8	44.6	44.6	30.8
29	2014-06-03			20.2				20.9	6	6	0	6	0	6	6	6	11	11	11	2	9	0	9	13	13	13	2	11	0	11	17	17	17	5	12	0	12	21	21	21	8	13	0	13	44.6	13.8	44.6	44.6	30.8
29	2014-06-03			20.2				20.9	6	6	0	6	0	6	6	6	11	11	11	2	9	0	9	13	13	13	2	11	0	11	17	17	17	5	12	0	12	21	21	21	8	13	0	13	44.6	13.8	44.6	44.6	30.8
43	2014-06-03			20.2				24.1	12	6	0	6	6	12	12	6	19	18	11	2	9	7	16	23	22	13	2	11	9	20	30	29	17	5	12	12	24	35	34	21	8	13	13	26	104.6	13.8	44.6	104.6	30.8
43	2014-06-03			20.2				24.1	12	6	0	6	6	12	12	6	19	18	11	2	9	7	16	23	22	13	2	11	9	20	30	29	17	5	12	12	24	35	34	21	8	13	13	26	104.6	13.8	44.6	104.6	30.8
29	2014-06-03			20.2				20.9	6	6	0	6	0	6	6	6	11	11	11	2	9	0	9	13	13	13	2	11	0	11	17	17	17	5	12	0	12	21	21	21	8	13	0	13	44.6	13.8	44.6	44.6	30.8
29	2014-06-03			20.2				20.9	6	6	0	6	0	6	6	6	11	11	11	2	9	0	9	13	13	13	2	11	0	11	17	17	17	5	12	0	12	21	21	21	8	13	0	13	44.6	13.8	44.6	44.6	30.8
29	2014-06-03			20.2				20.9	6	6	0	6	0	6	6	6	11	11	11	2	9	0	9	13	13	13	2	11	0	11	17	17	17	5	12	0	12	21	21	21	8	13	0	13	44.6	13.8	44.6	44.6	30.8
85	2014-06-03			20.2				38.4	12	6	0	6	6	12	33	6	52	18	11	2	9	7	16	60	22	13	2	11	9	20	71	29	17	5	12	12	24	77	34	21	8	13	13	26	242.2	13.8	44.6	104.6	30.8
85	2014-06-03			20.2				38.4	12	6	0	6	6	12	33	6	52	18	11	2	9	7	16	60	22	13	2	11	9	20	71	29	17	5	12	12	24	77	34	21	8	13	13	26	242.2	13.8	44.6	104.6	30.8
85	2014-06-03			20.2				38.4	12	6	0	6	6	12	33	6	52	18	11	2	9	7	16	60	22	13	2	11	9	20	71	29	17	5	12	12	24	77	34	21	8	13	13	26	242.2	13.8	44.6	104.6	30.8
33	2015-11-02	64.1	66.1	70.2	61.6	53	59.3	64.1	2	2	2	0	0	0	2	11	2	2	2	2	0	0	0	7	7	7	4	3	0	3	14	14	13	6	7	1	8	27	27	22	12	10	5	15	8.8	8.8	8.8	8.8	0
33	2015-11-02	64.1	66.1	70.2	61.6	53	59.3	64.1	2	2	2	0	0	0	2	11	2	2	2	2	0	0	0	7	7	7	4	3	0	3	14	14	13	6	7	1	8	27	27	22	12	10	5	15	8.8	8.8	8.8	8.8	0
33	2015-11-02	64.1	66.1	70.2	61.6	53	59.3	64.1	2	2	2	0	0	0	2	11	2	2	2	2	0	0	0	7	7	7	4	3	0	3	14	14	13	6	7	1	8	27	27	22	12	10	5	15	8.8	8.8	8.8	8.8	0
33	2015-11-02	64.1	66.1	70.2	61.6	53	59.3	64.1	2	2	2	0	0	0	2	11	2	2	2	2	0	0	0	7	7	7	4	3	0	3	14	14	13	6	7	1	8	27	27	22	12	10	5	15	8.8	8.8	8.8	8.8	0
33	2015-11-02	64.1	66.1	70.2	61.6	53	59.3	64.1	2	2	2	0	0	0	2	11	2	2	2	2	0	0	0	7	7	7	4	3	0	3	14	14	13	6	7	1	8	27	27	22	12	10	5	15	8.8	8.8	8.8	8.8	0
33	2015-11-02	64.1	66.1	70.2	61.6	53	59.3	64.1	2	2	2	0	0	0	2	11	2	2	2	2	0	0	0	7	7	7	4	3	0	3	14	14	13	6	7	1	8	27	27	22	12	10	5	15	8.8	8.8	8.8	8.8	0
33	2015-11-02	64.1	66.1	70.2	61.6	53	59.3	64.1	2	2	2	0	0	0	2	11	2	2	2	2	0	0	0	7	7	7	4	3	0	3	14	14	13	6	7	1	8	27	27	22	12	10	5	15	8.8	8.8	8.8	8.8	0
33	2015-11-02	64.1	66.1	70.2	61.6	53	59.3	64.1	2	2	2	0	0	0	2	11	2	2	2	2	0	0	0	7	7	7	4	3	0	3	14	14	13	6	7	1	8	27	27	22	12	10	5	15	8.8	8.8	8.8	8.8	0
33	2015-11-02	64.1	66.1	70.2	61.6	53	59.3	64.1	2	2	2	0	0	0	2	11	2	2	2	2	0	0	0	7	7	7	4	3	0	3	14	14	13	6	7	1	8	27	27	22	12	10	5	15	8.8	8.8	8.8	8.8	0
33	2015-11-02	64.1	66.1	70.2	61.6	53	59.3	64.1	2	2	2	0	0	0	2	11	2	2	2	2	0	0	0	7	7	7	4	3	0	3	14	14	13	6	7	1	8	27	27	22	12	10	5	15	8.8	8.8	8.8	8.8	0
33	2015-11-02	64.1	66.1	70.2	61.6	53	59.3	64.1	2	2	2	0	0	0	2	11	2	2	2	2	0	0	0	7	7	7	4	3	0	3	14	14	13	6	7	1	8	27	27	22	12	10	5	15	8.8	8.8	8.8	8.8	0
33	2015-11-02	64.1	66.1	70.2	61.6	53	59.3	64.1	2	2	2	0	0	0	2	11	2	2	2	2	0	0	0	7	7	7	4	3	0	3	14	14	13	6	7	1	8	27	27	22	12	10	5	15	8.8	8.8	8.8	8.8	0
51	2015-11-20	70.7	73.6	75.7	71.4	64.6	68	68	5	4	2	2	1	3	5	11	6	6	5	3	2	1	3	13	13	9	5	4	4	8	24	23	13	7	6	10	16	41	34	23	11	12	11	23	22	8.6	21.4	22	12.8
51	2015-11-20	70.7	73.6	75.7	71.4	64.6	68	68	5	4	2	2	1	3	5	11	6	6	5	3	2	1	3	13	13	9	5	4	4	8	24	23	13	7	6	10	16	41	34	23	11	12	11	23	22	8.6	21.4	22	12.8
51	2015-11-20	70.7	73.6	75.7	71.4	64.6	68	68	5	4	2	2	1	3	5	11	6	6	5	3	2	1	3	13	13	9	5	4	4	8	24	23	13	7	6	10	16	41	34	23	11	12	11	23	22	8.6	21.4	22	12.8
51	2015-11-20	70.7	73.6	75.7	71.4	64.6	68	68	5	4	2	2	1	3	5	11	6	6	5	3	2	1	3	13	13	9	5	4	4	8	24	23	13	7	6	10	16	41	34	23	11	12	11	23	22	8.6	21.4	22	12.8
51	2015-11-20	70.7	73.6	75.7	71.4	64.6	68	68	5	4	2	2	1	3	5	11	6	6	5	3	2	1	3	13	13	9	5	4	4	8	24	23	13	7	6	10	16	41	34	23	11	12	11	23	22	8.6	21.4	22	12.8
51	2015-11-20	70.7	73.6	75.7	71.4	64.6	68	68	5	4	2	2	1	3	5	11	6	6	5	3	2	1	3	13	13	9	5	4	4	8	24	23	13	7	6	10	16	41	34	23	11	12	11	23	22	8.6	21.4	22	12.8
51	2015-11-20	70.7	73.6	75.7	71.4	64.6	68	68	5	4	2	2	1	3	5	11	6	6	5	3	2	1	3	13	13	9	5	4	4	8	24	23	13	7	6	10	16	41	34	23	11	12	11	23	22	8.6	21.4	22	12.8
51	2015-11-20	70.7	73.6	75.7	71.4	64.6	68	68	5	4	2	2	1	3	5	11	6	6	5	3	2	1	3	13	13	9	5	4	4	8	24	23	13	7	6	10	16	41	34	23	11	12	11	23	22	8.6	21.4	22	12.8
51	2015-11-20	70.7	73.6	75.7	71.4	64.6	68	68	5	4	2	2	1	3	5	11	6	6	5	3	2	1	3	13	13	9	5	4	4	8	24	23	13	7	6	10	16	41	34	23	11	12	11	23	22	8.6	21.4	22	12.8
51	2015-11-20	70.7	73.6	75.7	71.4	64.6	68	68	5	4	2	2	1	3	5	11	6	6	5	3	2	1	3	13	13	9	5	4	4	8	24	23	13	7	6	10	16	41	34	23	11	12	11	23	22	8.6	21.4	22	12.8
51	2015-11-20	70.7	73.6	75.7	71.4	64.6	68	68	5	4	2	2	1	3	5	11	6	6	5	3	2	1	3	13	13	9	5	4	4	8	24	23	13	7	6	10	16	41	34	23	11	12	11	23	22	8.6	21.4	22	12.8
51	2015-11-20	70.7	73.6	75.7	71.4	64.6	68	68	5	4	2	2	1	3	5	11	6	6	5	3	2	1	3	13	13	9	5	4	4	8	24	23	13	7	6	10	16	41	34	23	11	12	11	23	22	8.6	21.4	22	12.8
49	2016-01-23	78.7	78	77.1	79	80	79.5	79.5	5	4	3	1	1	2	5	1	9	9	7	5	2	2	4	18	16	11	8	3	5	8	27	23	16	8	8	7	15	39	34	23	9	14	11	25	21.6	4.6	8.2	13.6	3.6
49	2016-01-23	78.7	78	77.1	79	80	79.5	79.5	5	4	3	1	1	2	5	1	9	9	7	5	2	2	4	18	16	11	8	3	5	8	27	23	16	8	8	7	15	39	34	23	9	14	11	25	21.6	4.6	8.2	13.6	3.6
49	2016-01-23	78.7	78	77.1	79	80	79.5	79.5	5	4	3	1	1	2	5	1	9	9	7	5	2	2	4	18	16	11	8	3	5	8	27	23	16	8	8	7	15	39	34	23	9	14	11	25	21.6	4.6	8.2	13.6	3.6
49	2016-01-23	78.7	78	77.1	79	80	79.5	79.5	5	4	3	1	1	2	5	1	9	9	7	5	2	2	4	18	16	11	8	3	5	8	27	23	16	8	8	7	15	39	34	23	9	14	11	25	21.6	4.6	8.2	13.6	3.6
49	2016-01-23	78.7	78	77.1	79	80	79.5	79.5	5	4	3	1	1	2	5	1	9	9	7	5	2	2	4	18	16	11	8	3	5	8	27	23	16	8	8	7	15	39	34	23	9	14	11	25	21.6	4.6	8.2	13.6	3.6
49	2016-01-23	78.7	78	77.1	79	80	79.5	79.5	5	4	3	1	1	2	5	1	9	9	7	5	2	2	4	18	16	11	8	3	5	8	27	23	16	8	8	7	15	39	34	23	9	14	11	25	21.6	4.6	8.2	13.6	3.6
49	2016-01-23	78.7	78	77.1	79	80	79.5	79.5	5	4	3	1	1	2	5	1	9	9	7	5	2	2	4	18	16	11	8	3	5	8	27	23	16	8	8	7	15	39	34	23	9	14	11	25	21.6	4.6	8.2	13.6	3.6
49	2016-01-23	78.7	78	77.1	79	80	79.5	79.5	5	4	3	1	1	2	5	1	9	9	7	5	2	2	4	18	16	11	8	3	5	8	27	23	16	8	8	7	15	39	34	23	9	14	11	25	21.6	4.6	8.2	13.6	3.6
49	2016-01-23	78.7	78	77.1	79	80	79.5	79.5	5	4	3	1	1	2	5	1	9	9	7	5	2	2	4	18	16	11	8	3	5	8	27	23	16	8	8	7	15	39	34	23	9	14	11	25	21.6	4.6	8.2	13.6	3.6
49	2016-01-23	78.7	78	77.1	79	80	79.5	79.5	5	4	3	1	1	2	5	1	9	9	7	5	2	2	4	18	16	11	8	3	5	8	27	23	16	8	8	7	15	39	34	23	9	14	11	25	21.6	4.6	8.2	13.6	3.6
49	2016-01-23	78.7	78	77.1	79	80	79.5	79.5	5	4	3	1	1	2	5	1	9	9	7	5	2	2	4	18	16	11	8	3	5	8	27	23	16	8	8	7	15	39	34	23	9	14	11	25	21.6	4.6	8.2	13.6	3.6
49	2016-01-23	78.7	78	77.1	79	80	79.5	79.5	5	4	3	1	1	2	5	1	9	9	7	5	2	2	4	18	16	11	8	3	5	8	27	23	16	8	8	7	15	39	34	23	9	14	11	25	21.6	4.6	8.2	13.6	3.6
64	2016-02-07	76.6	75.6	74.2	77.1	78.8	77.9	78.3	9	8	5	3	1	4	10	2	16	14	12	7	5	2	7	29	22	19	11	8	3	11	39	28	20	12	8	8	16	53	36	22	13	9	14	23	33.6	12	16.6	20.2	4.6
64	2016-02-07	76.6	75.6	74.2	77.1	78.8	77.9	78.3	9	8	5	3	1	4	10	2	16	14	12	7	5	2	7	29	22	19	11	8	3	11	39	28	20	12	8	8	16	53	36	22	13	9	14	23	33.6	12	16.6	20.2	4.6
64	2016-02-07	76.6	75.6	74.2	77.1	78.8	77.9	78.3	9	8	5	3	1	4	10	2	16	14	12	7	5	2	7	29	22	19	11	8	3	11	39	28	20	12	8	8	16	53	36	22	13	9	14	23	33.6	12	16.6	20.2	4.6
64	2016-02-07	76.6	75.6	74.2	77.1	78.8	77.9	78.3	9	8	5	3	1	4	10	2	16	14	12	7	5	2	7	29	22	19	11	8	3	11	39	28	20	12	8	8	16	53	36	22	13	9	14	23	33.6	12	16.6	20.2	4.6
64	2016-02-07	76.6	75.6	74.2	77.1	78.8	77.9	78.3	9	8	5	3	1	4	10	2	16	14	12	7	5	2	7	29	22	19	11	8	3	11	39	28	20	12	8	8	16	53	36	22	13	9	14	23	33.6	12	16.6	20.2	4.6
64	2016-02-07	76.6	75.6	74.2	77.1	78.8	77.9	78.3	9	8	5	3	1	4	10	2	16	14	12	7	5	2	7	29	22	19	11	8	3	11	39	28	20	12	8	8	16	53	36	22	13	9	14	23	33.6	12	16.6	20.2	4.6
64	2016-02-07	76.6	75.6	74.2	77.1	78.8	77.9	78.3	9	8	5	3	1	4	10	2	16	14	12	7	5	2	7	29	22	19	11	8	3	11	39	28	20	12	8	8	16	53	36	22	13	9	14	23	33.6	12	16.6	20.2	4.6
64	2016-02-07	76.6	75.6	74.2	77.1	78.8	77.9	78.3	9	8	5	3	1	4	10	2	16	14	12	7	5	2	7	29	22	19	11	8	3	11	39	28	20	12	8	8	16	53	36	22	13	9	14	23	33.6	12	16.6	20.2	4.6
64	2016-02-07	76.6	75.6	74.2	77.1	78.8	77.9	78.3	9	8	5	3	1	4	10	2	16	14	12	7	5	2	7	29	22	19	11	8	3	11	39	28	20	12	8	8	16	53	36	22	13	9	14	23	33.6	12	16.6	20.2	4.6
64	2016-02-07	76.6	75.6	74.2	77.1	78.8	77.9	78.3	9	8	5	3	1	4	10	2	16	14	12	7	5	2	7	29	22	19	11	8	3	11	39	28	20	12	8	8	16	53	36	22	13	9	14	23	33.6	12	16.6	20.2	4.6
64	2016-02-07	76.6	75.6	74.2	77.1	78.8	77.9	78.3	9	8	5	3	1	4	10	2	16	14	12	7	5	2	7	29	22	19	11	8	3	11	39	28	20	12	8	8	16	53	36	22	13	9	14	23	33.6	12	16.6	20.2	4.6
64	2016-02-07	76.6	75.6	74.2	77.1	78.8	77.9	78.3	9	8	5	3	1	4	10	2	16	14	12	7	5	2	7	29	22	19	11	8	3	11	39	28	20	12	8	8	16	53	36	22	13	9	14	23	33.6	12	16.6	20.2	4.6
39	2016-04-09	82.6	82.1	82	82.3	84	83.1	82.6	6	5	1	4	1	5	6	4	15	15	13	7	6	2	8	25	25	22	11	11	3	14	30	30	23	12	11	7	18	34	34	26	14	12	8	20	43.2	3.8	23	43.2	19.2
39	2016-04-09	82.6	82.1	82	82.3	84	83.1	82.6	6	5	1	4	1	5	6	4	15	15	13	7	6	2	8	25	25	22	11	11	3	14	30	30	23	12	11	7	18	34	34	26	14	12	8	20	43.2	3.8	23	43.2	19.2
39	2016-04-09	82.6	82.1	82	82.3	84	83.1	82.6	6	5	1	4	1	5	6	4	15	15	13	7	6	2	8	25	25	22	11	11	3	14	30	30	23	12	11	7	18	34	34	26	14	12	8	20	43.2	3.8	23	43.2	19.2
39	2016-04-09	82.6	82.1	82	82.3	84	83.1	82.6	6	5	1	4	1	5	6	4	15	15	13	7	6	2	8	25	25	22	11	11	3	14	30	30	23	12	11	7	18	34	34	26	14	12	8	20	43.2	3.8	23	43.2	19.2
39	2016-04-09	82.6	82.1	82	82.3	84	83.1	82.6	6	5	1	4	1	5	6	4	15	15	13	7	6	2	8	25	25	22	11	11	3	14	30	30	23	12	11	7	18	34	34	26	14	12	8	20	43.2	3.8	23	43.2	19.2
39	2016-04-09	82.6	82.1	82	82.3	84	83.1	82.6	6	5	1	4	1	5	6	4	15	15	13	7	6	2	8	25	25	22	11	11	3	14	30	30	23	12	11	7	18	34	34	26	14	12	8	20	43.2	3.8	23	43.2	19.2
39	2016-04-09	82.6	82.1	82	82.3	84	83.1	82.6	6	5	1	4	1	5	6	4	15	15	13	7	6	2	8	25	25	22	11	11	3	14	30	30	23	12	11	7	18	34	34	26	14	12	8	20	43.2	3.8	23	43.2	19.2
39	2016-04-09	82.6	82.1	82	82.3	84	83.1	82.6	6	5	1	4	1	5	6	4	15	15	13	7	6	2	8	25	25	22	11	11	3	14	30	30	23	12	11	7	18	34	34	26	14	12	8	20	43.2	3.8	23	43.2	19.2
39	2016-04-09	82.6	82.1	82	82.3	84	83.1	82.6	6	5	1	4	1	5	6	4	15	15	13	7	6	2	8	25	25	22	11	11	3	14	30	30	23	12	11	7	18	34	34	26	14	12	8	20	43.2	3.8	23	43.2	19.2
39	2016-04-09	82.6	82.1	82	82.3	84	83.1	82.6	6	5	1	4	1	5	6	4	15	15	13	7	6	2	8	25	25	22	11	11	3	14	30	30	23	12	11	7	18	34	34	26	14	12	8	20	43.2	3.8	23	43.2	19.2
39	2016-04-09	82.6	82.1	82	82.3	84	83.1	82.6	6	5	1	4	1	5	6	4	15	15	13	7	6	2	8	25	25	22	11	11	3	14	30	30	23	12	11	7	18	34	34	26	14	12	8	20	43.2	3.8	23	43.2	19.2
39	2016-04-09	82.6	82.1	82	82.3	84	83.1	82.6	6	5	1	4	1	5	6	4	15	15	13	7	6	2	8	25	25	22	11	11	3	14	30	30	23	12	11	7	18	34	34	26	14	12	8	20	43.2	3.8	23	43.2	19.2
52	2016-04-22	82.5	82.4	82.9	81.8	82.7	82.2	82.7	7	3	2	1	4	5	8	4	21	19	13	6	7	6	13	32	29	19	8	11	10	21	38	31	21	9	12	10	22	46	38	27	13	14	11	25	65.8	25.4	26.4	46.2	1
52	2016-04-22	82.5	82.4	82.9	81.8	82.7	82.2	82.7	7	3	2	1	4	5	8	4	21	19	13	6	7	6	13	32	29	19	8	11	10	21	38	31	21	9	12	10	22	46	38	27	13	14	11	25	65.8	25.4	26.4	46.2	1
52	2016-04-22	82.5	82.4	82.9	81.8	82.7	82.2	82.7	7	3	2	1	4	5	8	4	21	19	13	6	7	6	13	32	29	19	8	11	10	21	38	31	21	9	12	10	22	46	38	27	13	14	11	25	65.8	25.4	26.4	46.2	1
52	2016-04-22	82.5	82.4	82.9	81.8	82.7	82.2	82.7	7	3	2	1	4	5	8	4	21	19	13	6	7	6	13	32	29	19	8	11	10	21	38	31	21	9	12	10	22	46	38	27	13	14	11	25	65.8	25.4	26.4	46.2	1
52	2016-04-22	82.5	82.4	82.9	81.8	82.7	82.2	82.7	7	3	2	1	4	5	8	4	21	19	13	6	7	6	13	32	29	19	8	11	10	21	38	31	21	9	12	10	22	46	38	27	13	14	11	25	65.8	25.4	26.4	46.2	1
52	2016-04-22	82.5	82.4	82.9	81.8	82.7	82.2	82.7	7	3	2	1	4	5	8	4	21	19	13	6	7	6	13	32	29	19	8	11	10	21	38	31	21	9	12	10	22	46	38	27	13	14	11	25	65.8	25.4	26.4	46.2	1
52	2016-04-22	82.5	82.4	82.9	81.8	82.7	82.2	82.7	7	3	2	1	4	5	8	4	21	19	13	6	7	6	13	32	29	19	8	11	10	21	38	31	21	9	12	10	22	46	38	27	13	14	11	25	65.8	25.4	26.4	46.2	1
52	2016-04-22	82.5	82.4	82.9	81.8	82.7	82.2	82.7	7	3	2	1	4	5	8	4	21	19	13	6	7	6	13	32	29	19	8	11	10	21	38	31	21	9	12	10	22	46	38	27	13	14	11	25	65.8	25.4	26.4	46.2	1
52	2016-04-22	82.5	82.4	82.9	81.8	82.7	82.2	82.7	7	3	2	1	4	5	8	4	21	19	13	6	7	6	13	32	29	19	8	11	10	21	38	31	21	9	12	10	22	46	38	27	13	14	11	25	65.8	25.4	26.4	46.2	1
52	2016-04-22	82.5	82.4	82.9	81.8	82.7	82.2	82.7	7	3	2	1	4	5	8	4	21	19	13	6	7	6	13	32	29	19	8	11	10	21	38	31	21	9	12	10	22	46	38	27	13	14	11	25	65.8	25.4	26.4	46.2	1
52	2016-04-22	82.5	82.4	82.9	81.8	82.7	82.2	82.7	7	3	2	1	4	5	8	4	21	19	13	6	7	6	13	32	29	19	8	11	10	21	38	31	21	9	12	10	22	46	38	27	13	14	11	25	65.8	25.4	26.4	46.2	1
52	2016-04-22	82.5	82.4	82.9	81.8	82.7	82.2	82.7	7	3	2	1	4	5	8	4	21	19	13	6	7	6	13	32	29	19	8	11	10	21	38	31	21	9	12	10	22	46	38	27	13	14	11	25	65.8	25.4	26.4	46.2	1
70	2016-05-10			85.1				83.3	3	3	1	2	0	2	9	5	25	14	10	4	6	4	10	40	23	15	6	9	8	17	46	25	15	6	9	10	19	61	38	24	12	12	14	26	118	46	66.4	78.6	20.4
70	2016-05-10			85.1				83.3	3	3	1	2	0	2	9	5	25	14	10	4	6	4	10	40	23	15	6	9	8	17	46	25	15	6	9	10	19	61	38	24	12	12	14	26	118	46	66.4	78.6	20.4
70	2016-05-10			85.1				83.3	3	3	1	2	0	2	9	5	25	14	10	4	6	4	10	40	23	15	6	9	8	17	46	25	15	6	9	10	19	61	38	24	12	12	14	26	118	46	66.4	78.6	20.4
70	2016-05-10			85.1				83.3	3	3	1	2	0	2	9	5	25	14	10	4	6	4	10	40	23	15	6	9	8	17	46	25	15	6	9	10	19	61	38	24	12	12	14	26	118	46	66.4	78.6	20.4
70	2016-05-10			85.1				83.3	3	3	1	2	0	2	9	5	25	14	10	4	6	4	10	40	23	15	6	9	8	17	46	25	15	6	9	10	19	61	38	24	12	12	14	26	118	46	66.4	78.6	20.4
70	2016-05-10			85.1				83.3	3	3	1	2	0	2	9	5	25	14	10	4	6	4	10	40	23	15	6	9	8	17	46	25	15	6	9	10	19	61	38	24	12	12	14	26	118	46	66.4	78.6	20.4
70	2016-05-10			85.1				83.3	3	3	1	2	0	2	9	5	25	14	10	4	6	4	10	40	23	15	6	9	8	17	46	25	15	6	9	10	19	61	38	24	12	12	14	26	118	46	66.4	78.6	20.4
70	2016-05-10			85.1				83.3	3	3	1	2	0	2	9	5	25	14	10	4	6	4	10	40	23	15	6	9	8	17	46	25	15	6	9	10	19	61	38	24	12	12	14	26	118	46	66.4	78.6	20.4
70	2016-05-10			85.1				83.3	3	3	1	2	0	2	9	5	25	14	10	4	6	4	10	40	23	15	6	9	8	17	46	25	15	6	9	10	19	61	38	24	12	12	14	26	118	46	66.4	78.6	20.4
70	2016-05-10			85.1				83.3	3	3	1	2	0	2	9	5	25	14	10	4	6	4	10	40	23	15	6	9	8	17	46	25	15	6	9	10	19	61	38	24	12	12	14	26	118	46	66.4	78.6	20.4
70	2016-05-10			85.1				83.3	3	3	1	2	0	2	9	5	25	14	10	4	6	4	10	40	23	15	6	9	8	17	46	25	15	6	9	10	19	61	38	24	12	12	14	26	118	46	66.4	78.6	20.4
70	2016-05-10			85.1				83.3	3	3	1	2	0	2	9	5	25	14	10	4	6	4	10	40	23	15	6	9	8	17	46	25	15	6	9	10	19	61	38	24	12	12	14	26	118	46	66.4	78.6	20.4
85	2016-05-25			83.8				83.4	3	2	1	1	1	2	10	5	27	11	6	2	4	5	9	44	18	10	3	7	8	15	52	20	12	5	7	8	15	70	32	21	8	13	11	24	122.6	4.6	50.6	71	46
85	2016-05-25			83.8				83.4	3	2	1	1	1	2	10	5	27	11	6	2	4	5	9	44	18	10	3	7	8	15	52	20	12	5	7	8	15	70	32	21	8	13	11	24	122.6	4.6	50.6	71	46
85	2016-05-25			83.8				83.4	3	2	1	1	1	2	10	5	27	11	6	2	4	5	9	44	18	10	3	7	8	15	52	20	12	5	7	8	15	70	32	21	8	13	11	24	122.6	4.6	50.6	71	46
85	2016-05-25			83.8				83.4	3	2	1	1	1	2	10	5	27	11	6	2	4	5	9	44	18	10	3	7	8	15	52	20	12	5	7	8	15	70	32	21	8	13	11	24	122.6	4.6	50.6	71	46
85	2016-05-25			83.8				83.4	3	2	1	1	1	2	10	5	27	11	6	2	4	5	9	44	18	10	3	7	8	15	52	20	12	5	7	8	15	70	32	21	8	13	11	24	122.6	4.6	50.6	71	46
85	2016-05-25			83.8				83.4	3	2	1	1	1	2	10	5	27	11	6	2	4	5	9	44	18	10	3	7	8	15	52	20	12	5	7	8	15	70	32	21	8	13	11	24	122.6	4.6	50.6	71	46
85	2016-05-25			83.8				83.4	3	2	1	1	1	2	10	5	27	11	6	2	4	5	9	44	18	10	3	7	8	15	52	20	12	5	7	8	15	70	32	21	8	13	11	24	122.6	4.6	50.6	71	46
85	2016-05-25			83.8				83.4	3	2	1	1	1	2	10	5	27	11	6	2	4	5	9	44	18	10	3	7	8	15	52	20	12	5	7	8	15	70	32	21	8	13	11	24	122.6	4.6	50.6	71	46
85	2016-05-25			83.8				83.4	3	2	1	1	1	2	10	5	27	11	6	2	4	5	9	44	18	10	3	7	8	15	52	20	12	5	7	8	15	70	32	21	8	13	11	24	122.6	4.6	50.6	71	46
85	2016-05-25			83.8				83.4	3	2	1	1	1	2	10	5	27	11	6	2	4	5	9	44	18	10	3	7	8	15	52	20	12	5	7	8	15	70	32	21	8	13	11	24	122.6	4.6	50.6	71	46
85	2016-05-25			83.8				83.4	3	2	1	1	1	2	10	5	27	11	6	2	4	5	9	44	18	10	3	7	8	15	52	20	12	5	7	8	15	70	32	21	8	13	11	24	122.6	4.6	50.6	71	46
85	2016-05-25			83.8				83.4	3	2	1	1	1	2	10	5	27	11	6	2	4	5	9	44	18	10	3	7	8	15	52	20	12	5	7	8	15	70	32	21	8	13	11	24	122.6	4.6	50.6	71	46
[truncated: 11 more columns]

## Sheet: Logan vs Hill raw data
Day	Month	Hour	Temperature	Dew Point Hill AFB	RH Hill	Temperature	Dew Point Logan	RH Logan	RH Hill
1999-01-01 05:00:00	1	5	1	0	93.1299	1	-1	86.6764	93.1299
1999-01-01 06:00:00	1	6				1	-1	86.6764						This data has been provided by the Utah Climate Center. Please cite the Climate Center when using this data.
1999-01-01 07:00:00	1	7	0	-3	80.4763	1	-1	86.6764	80.4763					Station Network	ISD-LITE
1999-01-01 08:00:00	1	8	0	-4	74.756	0	-2	86.576	74.756					Station ID	725755
1999-01-01 09:00:00	1	9	0	-3	80.4763	-1	-3	86.474	80.4763					Station Name	HILL AFB
1999-01-01 10:00:00	1	10	1	-3	74.9327	1	-3	74.9327	74.9327					Latitude	41.123
1999-01-01 11:00:00	1	11	2	-4	64.8354	2	-3	69.8061	64.8354					Longitude	-111.973
1999-01-01 12:00:00	1	12	3	-4	60.4252	3	-3	65.0622	60.4252					Elevation	1459.7 m
1999-01-01 13:00:00	1	13	2	-4	64.8354	3	-4	60.4252	64.8354					State
1999-01-01 14:00:00	1	14	3	-3	65.0622	4	-4	56.3424	65.0622					Country	US
1999-01-01 15:00:00	1	15	2	-3	69.8061	4	-5	52.2871	69.8061					Units	Metric
1999-01-01 16:00:00	1	16	3	-4	60.4252	3	-5	56.08	60.4252					*Note: 'S' Indicates a row that has been filled in by the system as a missing hour.
1999-01-01 17:00:00	1	17	2	-4	64.8354				64.8354					*Note: All data is displayed the same as we receive it.
1999-01-01 18:00:00	1	18	0	-3	80.4763	1	-3	74.9327	80.4763
1999-01-01 19:00:00	1	19	0	-4	74.756	-1	-3	86.474	74.756
1999-01-01 20:00:00	1	20	0	-4	74.756	-1	-3	86.474	74.756
1999-01-01 21:00:00	1	21	-1	-5	74.5767	-1	-3	86.474	74.5767
1999-01-01 22:00:00	1	22	-1	-5	74.5767	-2	-4	86.3705	74.5767
1999-01-01 23:00:00	1	23	-1	-5	74.5767	-3	-4	92.9108	74.5767
1999-01-02	1	0				-4	-5	92.8539
1999-01-02 01:00:00	1	1	-3	-6	80.0396	-4	-6	86.1586	80.0396
1999-01-02 02:00:00	1	2	-4	-6	86.1586	-4	-6	86.1586	86.1586
1999-01-02 03:00:00	1	3	-5	-6	92.796	-5	-6	92.796	92.796
1999-01-02 04:00:00	1	4	-4	-6	86.1586	-6	-7	92.7371	86.1586
1999-01-02 05:00:00	1	5	-4	-6	86.1586	-6	-7	92.7371	86.1586
1999-01-02 06:00:00	1	6	-4	-6	86.1586	-6	-6	100	86.1586
1999-01-02 07:00:00	1	7	-5	-7	86.0502	-6	-7	92.7371	86.0502
1999-01-02 08:00:00	1	8	-5	-7	86.0502	-5	-6	92.796	86.0502
1999-01-02 09:00:00	1	9	-4	-6	86.1586	-4	-5	92.8539	86.1586
1999-01-02 10:00:00	1	10	-2	-4	86.3705	-3	-6	80.0396	86.3705
1999-01-02 11:00:00	1	11	0	-3	80.4763	-2	-5	80.1873	80.4763
1999-01-02 12:00:00	1	12	0	-4	74.756	0	-4	74.756	74.756
1999-01-02 13:00:00	1	13	1	-4	69.6017	1	-4	69.6017	69.6017
1999-01-02 14:00:00	1	14	2	-4	64.8354	1	-3	74.9327	64.8354
1999-01-02 15:00:00	1	15	2	-5	60.1772	1	-4	69.6017	60.1772
1999-01-02 16:00:00	1	16	2	-7	51.7312	1	-5	64.6056	51.7312
1999-01-02 17:00:00	1	17	1	-7	55.5459	1	-6	59.9261	55.5459
1999-01-02 18:00:00	1	18	-1	-6	69.1848	-1	-4	80.3328	69.1848
1999-01-02 19:00:00	1	19				-3	-4	92.9108
1999-01-02 20:00:00	1	20	-2	-6	74.3949	-3	-6	80.0396	74.3949
1999-01-02 21:00:00	1	21	-3	-6	80.0396	-4	-6	86.1586	80.0396
1999-01-02 22:00:00	1	22	-4	-7	79.8897	-4	-7	79.8897	79.8897
1999-01-02 23:00:00	1	23				-4	-7	79.8897
1999-01-03	1	0	-4	-6	86.1586	-5	-7	86.0502	86.1586
1999-01-03 01:00:00	1	1	-5	-7	86.0502	-6	-8	85.9401	86.0502
1999-01-03 02:00:00	1	2
1999-01-03 03:00:00	1	3				-6	-9	79.583
1999-01-03 04:00:00	1	4	-6	-9	79.583	-7	-11	73.4459	79.583
1999-01-03 05:00:00	1	5	-6	-9	79.583	-8	-10	85.7146	79.583
1999-01-03 06:00:00	1	6	-7	-9	85.8282	-8	-11	79.2669	85.8282
1999-01-03 07:00:00	1	7	-7	-10	79.4262	-8	-10	85.7146	79.4262
1999-01-03 08:00:00	1	8	-8	-10	85.7146	-8	-11	79.2669	85.7146
1999-01-03 09:00:00	1	9	-7	-9	85.8282	-7	-10	79.4262	85.8282
1999-01-03 10:00:00	1	10	-3	-7	74.2106	-6	-9	79.583	74.2106
1999-01-03 11:00:00	1	11	-3	-8	68.7564				68.7564
1999-01-03 12:00:00	1	12	-1	-8	59.4146	-4	-8	74.0235	59.4146
1999-01-03 13:00:00	1	13	-1	-8	59.4146	-3	-7	74.2106	59.4146
1999-01-03 14:00:00	1	14	-1	-8	59.4146	-1	-7	64.1371	59.4146
1999-01-03 15:00:00	1	15	0	-10	47.3214	-1	-7	64.1371	47.3214
1999-01-03 16:00:00	1	16	-1	-9	54.9993	0	-8	55.2742	54.9993
1999-01-03 17:00:00	1	17	-1	-9	54.9993	-1	-8	59.4146	54.9993
1999-01-03 18:00:00	1	18	-3	-8	68.7564	-3	-6	80.0396	68.7564
1999-01-03 19:00:00	1	19	-4	-9	68.5378	-3	-6	80.0396	68.5378
1999-01-03 20:00:00	1	20	-3	-10	58.8903	-4	-6	86.1586	58.8903
1999-01-03 21:00:00	1	21	-3	-9	63.6563	-5	-7	86.0502	63.6563
1999-01-03 22:00:00	1	22	-5	-9	73.8338	-4	-8	74.0235	73.8338
1999-01-03 23:00:00	1	23	-5	-9	73.8338	-6	-7	92.7371	73.8338
1999-01-04	1	0	-6	-9	79.583	-7	-8	92.6773	79.583
1999-01-04 01:00:00	1	1	-6	-9	79.583	-6	-8	85.9401	79.583
1999-01-04 02:00:00	1	2	-6	-9	79.583	-7	-8	92.6773	79.583
1999-01-04 03:00:00	1	3	-6	-9	79.583	-7	-8	92.6773	79.583
1999-01-04 04:00:00	1	4	-7	-10	79.4262	-7	-8	92.6773	79.4262
1999-01-04 05:00:00	1	5	-7	-10	79.4262				79.4262
1999-01-04 06:00:00	1	6	-7	-10	79.4262	-8	-9	92.6165	79.4262
1999-01-04 07:00:00	1	7	-7	-10	79.4262	-8	-9	92.6165	79.4262
1999-01-04 08:00:00	1	8	-7	-10	79.4262	-8	-10	85.7146	79.4262
1999-01-04 09:00:00	1	9	-5	-9	73.8338	-7	-9	85.8282	73.8338
1999-01-04 10:00:00	1	10
1999-01-04 11:00:00	1	11	-1	-8	59.4146	-4	-7	79.8897	59.4146
1999-01-04 12:00:00	1	12	-1	-8	59.4146	-2	-7	68.9721	59.4146
1999-01-04 13:00:00	1	13	2	-7	51.7312	-1	-6	69.1848	51.7312
1999-01-04 14:00:00	1	14	2	-7	51.7312	1	-6	59.9261	51.7312
1999-01-04 15:00:00	1	15	3	-7	48.2021	2	-6	55.8145	48.2021
1999-01-04 16:00:00	1	16	3	-7	48.2021	1	-6	59.9261	48.2021
1999-01-04 17:00:00	1	17	1	-7	55.5459	1	-4	69.6017	55.5459
1999-01-04 18:00:00	1	18	1	-7	55.5459	0	-4	74.756	55.5459
1999-01-04 19:00:00	1	19	-1	-7	64.1371	-1	-3	86.474	64.1371
1999-01-04 20:00:00	1	20	0	-6	64.3729	0	-4	74.756	64.3729
1999-01-04 21:00:00	1	21	2	-8	47.9116	0	-3	80.4763	47.9116
1999-01-04 22:00:00	1	22	1	-7	55.5459	-1	-3	86.474	55.5459
1999-01-04 23:00:00	1	23	0	-6	64.3729	-1	-3	86.474	64.3729
1999-01-05	1	0				0	-3	80.4763
1999-01-05 01:00:00	1	1	0	-6	64.3729	-1	-2	93.0221	64.3729
1999-01-05 02:00:00	1	2	0	-7	59.6719	-1	-3	86.474	59.6719
1999-01-05 03:00:00	1	3
1999-01-05 04:00:00	1	4	-1	-6	69.1848	-1	-3	86.474	69.1848
1999-01-05 05:00:00	1	5	0	-7	59.6719	-1	-4	80.3328	59.6719
1999-01-05 06:00:00	1	6	0	-7	59.6719	-3	-4	92.9108	59.6719
1999-01-05 07:00:00	1	7	-1	-7	64.1371	-3	-5	86.2654	64.1371
1999-01-05 08:00:00	1	8	-3	-7	74.2106	-4	-6	86.1586	74.2106
1999-01-05 09:00:00	1	9				-3	-5	86.2654
1999-01-05 10:00:00	1	10	2	-6	55.8145				55.8145
1999-01-05 11:00:00	1	11	3	-6	52.0107	2	-5	60.1772	52.0107
1999-01-05 12:00:00	1	12	4	-6	48.4896	3	-4	60.4252	48.4896
1999-01-05 13:00:00	1	13	5	-7	41.9105	3	-4	60.4252	41.9105
1999-01-05 14:00:00	1	14	6	-9	33.5008	4	-4	56.3424	33.5008
1999-01-05 15:00:00	1	15	7	-8	33.8006	4	-4	56.3424	33.8006
1999-01-05 16:00:00	1	16	7	-7	36.5087	3	-3	65.0622	36.5087
1999-01-05 17:00:00	1	17	6	-6	42.2066	4	-3	60.6703	42.2066
1999-01-05 18:00:00	1	18	5	-6	45.2285	2	-3	69.8061	45.2285
1999-01-05 19:00:00	1	19	2	-5	60.1772	0	-2	86.576	60.1772
1999-01-05 20:00:00	1	20	1	-5	64.6056	-1	-3	86.474	64.6056
1999-01-05 21:00:00	1	21	3	-5	56.08	-1	-3	86.474	56.08
1999-01-05 22:00:00	1	22	2	-6	55.8145	-2	-4	86.3705	55.8145
1999-01-05 23:00:00	1	23	1	-5	64.6056	-2	-4	86.3705	64.6056
1999-01-06	1	0	2	-5	60.1772	-3	-4	92.9108	60.1772
1999-01-06 01:00:00	1	1	0	-6	64.3729	-3	-5	86.2654	64.3729
1999-01-06 02:00:00	1	2	2	-5	60.1772	-3	-6	80.0396	60.1772
1999-01-06 03:00:00	1	3	1	-5	64.6056	-3	-4	92.9108	64.6056
1999-01-06 04:00:00	1	4				-3	-4	92.9108
1999-01-06 05:00:00	1	5	1	-5	64.6056	-4	-5	92.8539	64.6056
1999-01-06 06:00:00	1	6	0	-5	69.3947	-4	-6	86.1586	69.3947
1999-01-06 07:00:00	1	7	-1	-5	74.5767	-4	-5	92.8539	74.5767
1999-01-06 08:00:00	1	8	-1	-5	74.5767	-4	-6	86.1586	74.5767
1999-01-06 09:00:00	1	9	-1	-4	80.3328	-2	-4	86.3705	80.3328
1999-01-06 10:00:00	1	10	3	-4	60.4252	-1	-3	86.474	60.4252
1999-01-06 11:00:00	1	11	6	-4	49.0557	2	-2	75.107	49.0557
1999-01-06 12:00:00	1	12	8	-5	39.6996	2	-1	80.757	39.6996
1999-01-06 13:00:00	1	13	9	-4	39.9919	4	-2	65.2863	39.9919
1999-01-06 14:00:00	1	14	10	-4	37.3927	6	-2	56.8583	37.3927
1999-01-06 15:00:00	1	15	9	-4	39.9919	7	-2	53.0986	39.9919
1999-01-06 16:00:00	1	16	9	-4	39.9919	6	0	65.7259	39.9919
1999-01-06 17:00:00	1	17	8	-4	42.7906	4	-1	70.2067	42.7906
1999-01-06 18:00:00	1	18	6	-4	49.0557	2	-2	75.107	49.0557
1999-01-06 19:00:00	1	19	7	-4	45.8057	2	-2	75.107	45.8057
1999-01-06 20:00:00	1	20
1999-01-06 21:00:00	1	21	6	-4	49.0557	1	-1	86.6764	49.0557
1999-01-06 22:00:00	1	22	7	-4	45.8057	1	-1	86.6764	45.8057
1999-01-06 23:00:00	1	23	5	-4	52.5606	0	-2	86.576	52.5606
1999-01-07	1	0	4	-4	56.3424	0	-1	93.0764	56.3424
1999-01-07 01:00:00	1	1	3	-3	65.0622	0	-1	93.0764	65.0622
1999-01-07 02:00:00	1	2	6	-4	49.0557	0	-2	86.576	49.0557
1999-01-07 03:00:00	1	3	6	-4	49.0557	0	-2	86.576	49.0557
1999-01-07 04:00:00	1	4	4	-3	60.6703	1	-1	86.6764	60.6703
1999-01-07 05:00:00	1	5	3	-3	65.0622	-1	-1	100	65.0622
1999-01-07 06:00:00	1	6	6	-4	49.0557	0	-2	86.576	49.0557
1999-01-07 07:00:00	1	7	4	-4	56.3424	1	-2	80.6176	56.3424
1999-01-07 08:00:00	1	8	6	-4	49.0557	1	-2	80.6176	49.0557
1999-01-07 09:00:00	1	9	6	-4	49.0557				49.0557
1999-01-07 10:00:00	1	10				6	-2	56.8583
1999-01-07 11:00:00	1	11	6	-4	49.0557	7	-7	36.5087	49.0557
1999-01-07 12:00:00	1	12	8	-8	31.5666	7	-6	39.4048	31.5666
1999-01-07 13:00:00	1	13	7	-2	53.0986	7	-6	39.4048	53.0986
1999-01-07 14:00:00	1	14				7	-6	39.4048
1999-01-07 15:00:00	1	15	6	-8	36.2093	7	-6	39.4048	36.2093
1999-01-07 16:00:00	1	16	6	-7	39.1074	7	-6	39.4048	39.1074
1999-01-07 17:00:00	1	17	3	-6	52.0107	3	-2	70.0077	52.0107
1999-01-07 18:00:00	1	18	3	-7	48.2021	2	-3	69.8061	48.2021
1999-01-07 19:00:00	1	19	2	-7	51.7312	1	-3	74.9327	51.7312
1999-01-07 20:00:00	1	20	1	-5	64.6056	1	-3	74.9327	64.6056
1999-01-07 21:00:00	1	21	0	-4	74.756	1	-3	74.9327	74.756
1999-01-07 22:00:00	1	22	-1	-4	80.3328	2	-4	64.8354	80.3328
1999-01-07 23:00:00	1	23	-1	-5	74.5767	1	-3	74.9327	74.5767
1999-01-08	1	0	1	-6	59.9261	0	-1	93.0764	59.9261
1999-01-08 01:00:00	1	1	0	-4	74.756	-1	-1	100	74.756
1999-01-08 02:00:00	1	2	-1	-4	80.3328	-1	-2	93.0221	80.3328
1999-01-08 03:00:00	1	3	-1	-3	86.474	-1	-1	100	86.474
1999-01-08 04:00:00	1	4	-2	-4	86.3705	-1	-2	93.0221	86.3705
1999-01-08 05:00:00	1	5	-1	-4	80.3328	-1	-2	93.0221	80.3328
1999-01-08 06:00:00	1	6				-2	-2	100
1999-01-08 07:00:00	1	7	-4	-5	92.8539	-3	-4	92.9108	92.8539
1999-01-08 08:00:00	1	8	-3	-5	86.2654	-3	-4	92.9108	86.2654
1999-01-08 09:00:00	1	9	-2	-4	86.3705	-5	-6	92.796	86.3705
1999-01-08 10:00:00	1	10	0	-4	74.756	-2	-3	92.9669	74.756
1999-01-08 11:00:00	1	11	0	-4	74.756	-1	-3	86.474	74.756
1999-01-08 12:00:00	1	12	1	-4	69.6017	0	-2	86.576	69.6017
1999-01-08 13:00:00	1	13	2	-5	60.1772	2	-4	64.8354	60.1772
1999-01-08 14:00:00	1	14	3	-6	52.0107	2	-5	60.1772	52.0107
1999-01-08 15:00:00	1	15	3	-6	52.0107	3	-4	60.4252	52.0107
1999-01-08 16:00:00	1	16	2	-6	55.8145				55.8145
1999-01-08 17:00:00	1	17	0	-5	69.3947	2	-5	60.1772	69.3947
1999-01-08 18:00:00	1	18	0	-5	69.3947	1	-4	69.6017	69.3947
1999-01-08 19:00:00	1	19	-1	-5	74.5767	0	-3	80.4763	74.5767
1999-01-08 20:00:00	1	20	-1	-5	74.5767	0	-3	80.4763	74.5767
1999-01-08 21:00:00	1	21	-2	-6	74.3949	-2	-4	86.3705	74.3949
1999-01-08 22:00:00	1	22	-1	-6	69.1848	-1	-4	80.3328	69.1848
1999-01-08 23:00:00	1	23	-2	-5	80.1873	-2	-4	86.3705	80.1873
1999-01-09	1	0	-3	-6	80.0396	-1	-4	80.3328	80.0396
1999-01-09 01:00:00	1	1	-1	-6	69.1848	-2	-3	92.9669	69.1848
1999-01-09 02:00:00	1	2	0	-6	64.3729	-1	-4	80.3328	64.3729
1999-01-09 03:00:00	1	3	0	-6	64.3729	-1	-3	86.474	64.3729
1999-01-09 04:00:00	1	4	0	-6	64.3729	-2	-3	92.9669	64.3729
1999-01-09 05:00:00	1	5	-1	-5	74.5767	-1	-3	86.474	74.5767
1999-01-09 06:00:00	1	6	0	-6	64.3729	-1	-3	86.474	64.3729
1999-01-09 07:00:00	1	7	-1	-6	69.1848	-1	-3	86.474	69.1848
1999-01-09 08:00:00	1	8	0	-6	64.3729	-1	-3	86.474	64.3729
1999-01-09 09:00:00	1	9	1	-6	59.9261	-1	-3	86.474	59.9261
1999-01-09 10:00:00	1	10	1	-5	64.6056	1	-4	69.6017	64.6056
1999-01-09 11:00:00	1	11	3	-6	52.0107	2	-4	64.8354	52.0107
1999-01-09 12:00:00	1	12	4	-6	48.4896	3	-5	56.08	48.4896
1999-01-09 13:00:00	1	13	4	-6	48.4896	3	-4	60.4252	48.4896
1999-01-09 14:00:00	1	14	5	-7	41.9105	4	-6	48.4896	41.9105
1999-01-09 15:00:00	1	15	5	-8	38.8075	4	-4	56.3424	38.8075
1999-01-09 16:00:00	1	16	5	-8	38.8075	4	-5	52.2871	38.8075
1999-01-09 17:00:00	1	17	4	-7	44.9356	4	-5	52.2871	44.9356
1999-01-09 18:00:00	1	18
1999-01-09 19:00:00	1	19
1999-01-09 20:00:00	1	20
1999-01-09 21:00:00	1	21
1999-01-09 22:00:00	1	22
1999-01-09 23:00:00	1	23
1999-01-10	1	0
1999-01-10 01:00:00	1	1
1999-01-10 02:00:00	1	2
1999-01-10 03:00:00	1	3
1999-01-10 04:00:00	1	4
1999-01-10 05:00:00	1	5
1999-01-10 06:00:00	1	6
1999-01-10 07:00:00	1	7
1999-01-10 08:00:00	1	8
1999-01-10 09:00:00	1	9
1999-01-10 10:00:00	1	10
1999-01-10 11:00:00	1	11
1999-01-10 12:00:00	1	12
1999-01-10 13:00:00	1	13
1999-01-10 14:00:00	1	14
1999-01-10 15:00:00	1	15
1999-01-10 16:00:00	1	16
1999-01-10 17:00:00	1	17
1999-01-10 18:00:00	1	18	5	-6	45.2285	6	-4	49.0557	45.2285
1999-01-10 19:00:00	1	19	7	-6	39.4048	3	-2	70.0077	39.4048
1999-01-10 20:00:00	1	20	6	-6	42.2066	1	-3	74.9327	42.2066
1999-01-10 21:00:00	1	21	3	-6	52.0107	1	-3	74.9327	52.0107
1999-01-10 22:00:00	1	22	4	-6	48.4896	-1	-3	86.474	48.4896
1999-01-10 23:00:00	1	23	2	-5	60.1772	-1	-3	86.474	60.1772
1999-01-11	1	0	2	-6	55.8145	-2	-4	86.3705	55.8145
1999-01-11 01:00:00	1	1	2	-5	60.1772	-2	-3	92.9669	60.1772
1999-01-11 02:00:00	1	2	3	-5	56.08	-1	-4	80.3328	56.08
1999-01-11 03:00:00	1	3	-1	-5	74.5767	-2	-4	86.3705	74.5767
1999-01-11 04:00:00	1	4	0	-5	69.3947	-3	-4	92.9108	69.3947
1999-01-11 05:00:00	1	5				-2	-5	80.1873
1999-01-11 06:00:00	1	6	0	-5	69.3947	-4	-6	86.1586	69.3947
1999-01-11 07:00:00	1	7	0	-5	69.3947	-4	-6	86.1586	69.3947
1999-01-11 08:00:00	1	8				-3	-6	80.0396
1999-01-11 09:00:00	1	9	2	-5	60.1772	-1	-4	80.3328	60.1772
1999-01-11 10:00:00	1	10	4	-4	56.3424	2	-2	75.107	56.3424
1999-01-11 11:00:00	1	11	7	-4	45.8057	6	-4	49.0557	45.8057
1999-01-11 12:00:00	1	12	8	-4	42.7906	7	-2	53.0986	42.7906
1999-01-11 13:00:00	1	13	9	-4	39.9919	8	-1	53.3633	39.9919
1999-01-11 14:00:00	1	14	10	-4	37.3927	9	-2	46.3718	37.3927
1999-01-11 15:00:00	1	15	9	-3	43.0786	11	-2	40.5689	43.0786
1999-01-11 16:00:00	1	16	8	-3	46.0901	8	0	57.3625	46.0901
1999-01-11 17:00:00	1	17	8	-4	42.7906	6	-1	61.1516	42.7906
1999-01-11 18:00:00	1	18	4	-4	56.3424	4	-1	70.2067	56.3424
1999-01-11 19:00:00	1	19	5	-5	48.7741	3	-2	70.0077	48.7741
1999-01-11 20:00:00	1	20	4	-4	56.3424	1	-3	74.9327	56.3424
1999-01-11 21:00:00	1	21				1	-3	74.9327
1999-01-11 22:00:00	1	22	3	-4	60.4252	0	-2	86.576	60.4252
1999-01-11 23:00:00	1	23	3	-3	65.0622	1	-2	80.6176	65.0622
1999-01-12	1	0	4	-3	60.6703	2	-2	75.107	60.6703
1999-01-12 01:00:00	1	1				2	-2	75.107
1999-01-12 02:00:00	1	2	3	-4	60.4252	1	-2	80.6176	60.4252
1999-01-12 03:00:00	1	3	6	-5	45.5185	-1	-2	93.0221	45.5185
1999-01-12 04:00:00	1	4	6	-5	45.5185	0	-2	86.576	45.5185
1999-01-12 05:00:00	1	5				1	-2	80.6176
1999-01-12 06:00:00	1	6	1	-3	74.9327	-2	-3	92.9669	74.9327
1999-01-12 07:00:00	1	7	0	-3	80.4763	0	-3	80.4763	80.4763
1999-01-12 08:00:00	1	8	0	-2	86.576	1	-3	74.9327	86.576
1999-01-12 09:00:00	1	9	0	-2	86.576	1	-2	80.6176	86.576
1999-01-12 10:00:00	1	10	2	-3	69.8061	3	-1	75.279	69.8061
1999-01-12 11:00:00	1	11	4	-3	60.6703	4	-1	70.2067	60.6703
1999-01-12 12:00:00	1	12	4	-3	60.6703				60.6703
1999-01-12 13:00:00	1	13	4	-3	60.6703	6	-2	56.8583	60.6703
1999-01-12 14:00:00	1	14	5	-2	60.9124	6	-2	56.8583	60.9124
1999-01-12 15:00:00	1	15	5	-2	60.9124	6	-2	56.8583	60.9124
1999-01-12 16:00:00	1	16	4	-2	65.2863	5	-1	65.5075	65.2863
1999-01-12 17:00:00	1	17	3	-2	70.0077	4	-1	70.2067	70.0077
1999-01-12 18:00:00	1	18	3	-2	70.0077	2	-1	80.757	70.0077
1999-01-12 19:00:00	1	19	2	-3	69.8061	2	-1	80.757	69.8061
1999-01-12 20:00:00	1	20	2	-3	69.8061	2	-1	80.757	69.8061
1999-01-12 21:00:00	1	21	2	-3	69.8061	0	-2	86.576	69.8061
1999-01-12 22:00:00	1	22	2	-3	69.8061	0	-2	86.576	69.8061
1999-01-12 23:00:00	1	23	1	-2	80.6176	1	-2	80.6176	80.6176
1999-01-13	1	0	2	-3	69.8061	1	-1	86.6764	69.8061
1999-01-13 01:00:00	1	1	3	-3	65.0622	2	-1	80.757	65.0622
1999-01-13 02:00:00	1	2	2	-3	69.8061	1	0	93.1299	69.8061
1999-01-13 03:00:00	1	3	2	-3	69.8061	1	0	93.1299	69.8061
1999-01-13 04:00:00	1	4	2	-4	64.8354	1	0	93.1299	64.8354
1999-01-13 05:00:00	1	5	1	-2	80.6176	0	0	100	80.6176
1999-01-13 06:00:00	1	6	1	-2	80.6176	1	0	93.1299	80.6176
1999-01-13 07:00:00	1	7	0	-2	86.576	1	0	93.1299	86.576
1999-01-13 08:00:00	1	8	0	-2	86.576	1	0	93.1299	86.576
1999-01-13 09:00:00	1	9	1	-2	80.6176	1	0	93.1299	80.6176
1999-01-13 10:00:00	1	10	2	-2	75.107	1	0	93.1299	75.107
1999-01-13 11:00:00	1	11	3	-1	75.279	2	0	86.7753	75.279
1999-01-13 12:00:00	1	12	4	-2	65.2863	4	-1	70.2067	65.2863
1999-01-13 13:00:00	1	13	4	-3	60.6703	4	-1	70.2067	60.6703
1999-01-13 14:00:00	1	14				5	-2	60.9124
1999-01-13 15:00:00	1	15	4	-4	56.3424	4	-2	65.2863	56.3424
1999-01-13 16:00:00	1	16	5	-4	52.5606	5	-3	56.6018	52.5606
1999-01-13 17:00:00	1	17	3	-3	65.0622	4	-3	60.6703	65.0622
1999-01-13 18:00:00	1	18	0	-4	74.756	2	-3	69.8061	74.756
1999-01-13 19:00:00	1	19	1	-3	74.9327	1	-3	74.9327	74.9327
1999-01-13 20:00:00	1	20	-1	-5	74.5767	0	-3	80.4763	74.5767
1999-01-13 21:00:00	1	21	-1	-5	74.5767	-1	-4	80.3328	74.5767
1999-01-13 22:00:00	1	22	-2	-6	74.3949	-1	-4	80.3328	74.3949
1999-01-13 23:00:00	1	23	-2	-6	74.3949	-4	-5	92.8539	74.3949
1999-01-14	1	0	-3	-5	86.2654	-3	-4	92.9108	86.2654
1999-01-14 01:00:00	1	1	-2	-5	80.1873	-3	-6	80.0396	80.1873
1999-01-14 02:00:00	1	2	-4	-7	79.8897	-5	-7	86.0502	79.8897
1999-01-14 03:00:00	1	3	-4	-6	86.1586	-5	-7	86.0502	86.1586
1999-01-14 04:00:00	1	4	-4	-6	86.1586	-4	-6	86.1586	86.1586
1999-01-14 05:00:00	1	5	-3	-6	80.0396	-6	-7	92.7371	80.0396
1999-01-14 06:00:00	1	6	-4	-6	86.1586	-4	-7	79.8897	86.1586
1999-01-14 07:00:00	1	7	-3	-6	80.0396	-4	-6	86.1586	80.0396
1999-01-14 08:00:00	1	8	-3	-7	74.2106	-3	-6	80.0396	74.2106
1999-01-14 09:00:00	1	9	-2	-6	74.3949	-3	-5	86.2654	74.3949
1999-01-14 10:00:00	1	10	1	-5	64.6056	-1	-4	80.3328	64.6056
1999-01-14 11:00:00	1	11	4	-4	56.3424	0	-4	74.756	56.3424
1999-01-14 12:00:00	1	12	3	-4	60.4252	2	-3	69.8061	60.4252
1999-01-14 13:00:00	1	13	5	-5	48.7741	4	-3	60.6703	48.7741
1999-01-14 14:00:00	1	14	5	-5	48.7741	5	-3	56.6018	48.7741
1999-01-14 15:00:00	1	15	6	-6	42.2066	5	-3	56.6018	42.2066
1999-01-14 16:00:00	1	16	5	-5	48.7741	4	-3	60.6703	48.7741
1999-01-14 17:00:00	1	17	4	-3	60.6703	3	-2	70.0077	60.6703
1999-01-14 18:00:00	1	18	2	-3	69.8061	3	-2	70.0077	69.8061
1999-01-14 19:00:00	1	19	1	-4	69.6017	2	-2	75.107	69.6017
1999-01-14 20:00:00	1	20	3	-6	52.0107	1	-2	80.6176	52.0107
1999-01-14 21:00:00	1	21	4	-6	48.4896	1	-2	80.6176	48.4896
1999-01-14 22:00:00	1	22	3	-5	56.08	1	-2	80.6176	56.08
1999-01-14 23:00:00	1	23	2	-4	64.8354	1	-2	80.6176	64.8354
1999-01-15	1	0
1999-01-15 01:00:00	1	1
1999-01-15 02:00:00	1	2	3	-5	56.08	1	-2	80.6176	56.08
1999-01-15 03:00:00	1	3	4	-7	44.9356	0	-2	86.576	44.9356
1999-01-15 04:00:00	1	4
1999-01-15 05:00:00	1	5	2	-4	64.8354	3	-4	60.4252	64.8354
1999-01-15 06:00:00	1	6	4	-5	52.2871				52.2871
1999-01-15 07:00:00	1	7	4	-5	52.2871	2	-1	80.757	52.2871
1999-01-15 08:00:00	1	8	6	-4	49.0557	3	1	86.8728	49.0557
1999-01-15 09:00:00	1	9	5	-1	65.5075	3	1	86.8728	65.5075
1999-01-15 10:00:00	1	10	3	2	93.2344	4	2	86.9689	93.2344
1999-01-15 11:00:00	1	11	4	2	86.9689	5	2	81.1633	86.9689
1999-01-15 12:00:00	1	12	5	2	81.1633	6	3	81.2949	81.1633
1999-01-15 13:00:00	1	13	6	2	75.7809	6	3	81.2949	75.7809
1999-01-15 14:00:00	1	14	8	2	66.1548	7	3	75.9437	66.1548
1999-01-15 15:00:00	1	15	8	2	66.1548	7	3	75.9437	66.1548
1999-01-15 16:00:00	1	16	8	1	61.6216	7	3	75.9437	61.6216
1999-01-15 17:00:00	1	17	7	1	65.9417	8	3	70.9772	65.9417
1999-01-15 18:00:00	1	18	6	1	70.5969	2	1	93.1826	70.5969
1999-01-15 19:00:00	1	19	4	0	75.4485	1	-1	86.6764	75.4485
1999-01-15 20:00:00	1	20	4	0	75.4485	2	0	86.7753	75.4485
1999-01-15 21:00:00	1	21	1	-2	80.6176	-1	-1	100	80.6176
1999-01-15 22:00:00	1	22	2	-2	75.107	0	-1	93.0764	75.107
1999-01-15 23:00:00	1	23	1	-3	74.9327	-1	-2	93.0221	74.9327
1999-01-16	1	0	1	-3	74.9327	-2	-3	92.9669	74.9327
1999-01-16 01:00:00	1	1	3	-2	70.0077	-1	-2	93.0221	70.0077
1999-01-16 02:00:00	1	2	3	-3	65.0622	-1	-3	86.474	65.0622
1999-01-16 03:00:00	1	3	2	-2	75.107	-1	-2	93.0221	75.107
1999-01-16 04:00:00	1	4	3	-2	70.0077	0	-2	86.576	70.0077
1999-01-16 05:00:00	1	5	5	-3	56.6018	2	-2	75.107	56.6018
1999-01-16 06:00:00	1	6				1	-1	86.6764
1999-01-16 07:00:00	1	7	4	-1	70.2067	3	0	80.8943	70.2067
1999-01-16 08:00:00	1	8	3	1	86.8728	3	1	86.8728	86.8728
1999-01-16 09:00:00	1	9	2	1	93.1826	3	1	86.8728	93.1826
1999-01-16 10:00:00	1	10	1	1	100	4	1	81.0297	100
1999-01-16 11:00:00	1	11	3	1	86.8728	5	2	81.1633	86.8728
1999-01-16 12:00:00	1	12	5	1	75.6158	6	2	75.7809	75.6158
1999-01-16 13:00:00	1	13	6	2	75.7809	7	1	65.9417	75.7809
1999-01-16 14:00:00	1	14	7	2	70.7883	8	2	66.1548	70.7883
1999-01-16 15:00:00	1	15	7	2	70.7883	7	1	65.9417	70.7883
1999-01-16 16:00:00	1	16	6	2	75.7809	1	-1	86.6764	75.7809
1999-01-16 17:00:00	1	17	2	-1	80.757	1	-2	80.6176	80.757
1999-01-16 18:00:00	1	18	1	-2	80.6176	1	-2	80.6176	80.6176
1999-01-16 19:00:00	1	19	0	-3	80.4763	1	-3	74.9327	80.4763
1999-01-16 20:00:00	1	20	0	-4	74.756	1	-4	69.6017	74.756
1999-01-16 21:00:00	1	21	1	-5	64.6056	-1	-2	93.0221	64.6056
1999-01-16 22:00:00	1	22	1	-5	64.6056	0	-2	86.576	64.6056
1999-01-16 23:00:00	1	23	0	-5	69.3947	0	-3	80.4763	69.3947
1999-01-17	1	0	0	-4	74.756	0	-4	74.756	74.756
1999-01-17 01:00:00	1	1	0	-5	69.3947	0	-4	74.756	69.3947
1999-01-17 02:00:00	1	2	0	-5	69.3947	-1	-4	80.3328	69.3947
1999-01-17 03:00:00	1	3	0	-5	69.3947	-1	-4	80.3328	69.3947
1999-01-17 04:00:00	1	4	0	-5	69.3947	-1	-4	80.3328	69.3947
1999-01-17 05:00:00	1	5	-1	-4	80.3328	-2	-4	86.3705	80.3328
1999-01-17 06:00:00	1	6	-1	-4	80.3328	-1	-4	80.3328	80.3328
1999-01-17 07:00:00	1	7	-1	-5	74.5767	-1	-4	80.3328	74.5767
1999-01-17 08:00:00	1	8	0	-5	69.3947	-1	-4	80.3328	69.3947
1999-01-17 09:00:00	1	9	0	-4	74.756	1	-4	69.6017	74.756
1999-01-17 10:00:00	1	10	1	-4	69.6017	1	-4	69.6017	69.6017
1999-01-17 11:00:00	1	11	2	-5	60.1772	2	-4	64.8354	60.1772
1999-01-17 12:00:00	1	12	3	-6	52.0107	3	-4	60.4252	52.0107
1999-01-17 13:00:00	1	13	4	-6	48.4896	3	-7	48.2021	48.4896
1999-01-17 14:00:00	1	14	4	-6	48.4896	4	-7	44.9356	48.4896
1999-01-17 15:00:00	1	15	4	-5	52.2871	4	-7	44.9356	52.2871
1999-01-17 16:00:00	1	16	3	-4	60.4252	4	-7	44.9356	60.4252
1999-01-17 17:00:00	1	17	1	-2	80.6176	4	-4	56.3424	80.6176
1999-01-17 18:00:00	1	18	1	-1	86.6764	3	-3	65.0622	86.6764
1999-01-17 19:00:00	1	19				2	-2	75.107
1999-01-17 20:00:00	1	20	0	0	100	1	-1	86.6764	100
1999-01-17 21:00:00	1	21	1	0	93.1299	1	-1	86.6764	93.1299
1999-01-17 22:00:00	1	22	3	0	80.8943	0	-1	93.0764	80.8943
1999-01-17 23:00:00	1	23	3	0	80.8943	0	-1	93.0764	80.8943
1999-01-18	1	0	2	1	93.1826	1	0	93.1299	93.1826
1999-01-18 01:00:00	1	1	1	0	93.1299	0	-1	93.0764	93.1299
1999-01-18 02:00:00	1	2	1	0	93.1299	0	-1	93.0764	93.1299
1999-01-18 03:00:00	1	3	5	0	70.4031	0	-1	93.0764	70.4031
1999-01-18 04:00:00	1	4	4	0	75.4485	0	-1	93.0764	75.4485
1999-01-18 05:00:00	1	5	4	0	75.4485	-1	-1	100	75.4485
1999-01-18 06:00:00	1	6	5	-1	65.5075	1	0	93.1299	65.5075
1999-01-18 07:00:00	1	7	4	-1	70.2067	2	0	86.7753	70.2067
1999-01-18 08:00:00	1	8	5	0	70.4031	3	0	80.8943	70.4031
1999-01-18 09:00:00	1	9	6	0	65.7259	3	0	80.8943	65.7259
1999-01-18 10:00:00	1	10	5	0	70.4031	6	0	65.7259	70.4031
1999-01-18 11:00:00	1	11	4	0	75.4485	6	0	65.7259	75.4485
1999-01-18 12:00:00	1	12	5	0	70.4031	7	0	61.388	70.4031
1999-01-18 13:00:00	1	13	6	1	70.5969	9	0	53.6251	70.5969
1999-01-18 14:00:00	1	14	6	2	75.7809	10	-1	46.6507	75.7809
1999-01-18 15:00:00	1	15	6	2	75.7809	9	0	53.6251	75.7809
1999-01-18 16:00:00	1	16	6	2	75.7809	8	1	61.6216	75.7809
1999-01-18 17:00:00	1	17	5	3	87.0636	4	0	75.4485	87.0636
1999-01-18 18:00:00	1	18	6	2	75.7809	4	2	86.9689	75.7809
1999-01-18 19:00:00	1	19	5	2	81.1633	4	2	86.9689	81.1633
1999-01-18 20:00:00	1	20	4	4	100	3	2	93.2344	100
1999-01-18 21:00:00	1	21	3	3	100	3	2	93.2344	100
1999-01-18 22:00:00	1	22	3	3	100	3	1	86.8728	100
1999-01-18 23:00:00	1	23	3	2	93.2344	3	2	93.2344	93.2344
1999-01-19	1	0	2	2	100	3	1	86.8728	100
1999-01-19 01:00:00	1	1	2	2	100	2	1	93.1826	100
1999-01-19 02:00:00	1	2	1	0	93.1299	1	1	100	93.1299
1999-01-19 03:00:00	1	3	1	1	100	2	1	93.1826	100
1999-01-19 04:00:00	1	4	1	1	100	1	0	93.1299	100
1999-01-19 05:00:00	1	5				0	0	100
1999-01-19 06:00:00	1	6				0	-1	93.0764
1999-01-19 07:00:00	1	7	1	0	93.1299	1	0	93.1299	93.1299
1999-01-19 08:00:00	1	8	1	0	93.1299	0	-1	93.0764	93.1299
1999-01-19 09:00:00	1	9	2	0	86.7753	0	0	100	86.7753
1999-01-19 10:00:00	1	10	4	1	81.0297	1	0	93.1299	81.0297
1999-01-19 11:00:00	1	11	5	1	75.6158	2	1	93.1826	75.6158
1999-01-19 12:00:00	1	12	4	2	86.9689	2	2	100	86.9689
1999-01-19 13:00:00	1	13	5	3	87.0636	3	2	93.2344	87.0636
1999-01-19 14:00:00	1	14	5	2	81.1633	3	2	93.2344	81.1633
1999-01-19 15:00:00	1	15	4	4	100	4	3	93.2855	100
1999-01-19 16:00:00	1	16	4	3	93.2855	4	3	93.2855	93.2855
1999-01-19 17:00:00	1	17	6	2	75.7809	6	1	70.5969	75.7809
1999-01-19 18:00:00	1	18	5	1	75.6158	6	1	70.5969	75.6158
1999-01-19 19:00:00	1	19	4	0	75.4485	6	1	70.5969	75.4485
1999-01-19 20:00:00	1	20	4	-1	70.2067	5	1	75.6158	70.2067
1999-01-19 21:00:00	1	21	4	-1	70.2067	4	1	81.0297	70.2067
1999-01-19 22:00:00	1	22	3	-1	75.279	2	1	93.1826	75.279
1999-01-19 23:00:00	1	23	3	-1	75.279	2	-1	80.757	75.279
1999-01-20	1	0	5	-2	60.9124	2	-1	80.757	60.9124
1999-01-20 01:00:00	1	1	4	-2	65.2863	1	-1	86.6764	65.2863
1999-01-20 02:00:00	1	2	3	-2	70.0077	0	-1	93.0764	70.0077
1999-01-20 03:00:00	1	3	4	-2	65.2863	-1	-2	93.0221	65.2863
1999-01-20 04:00:00	1	4	4	-2	65.2863	0	-1	93.0764	65.2863
1999-01-20 05:00:00	1	5	5	-1	65.5075	1	-1	86.6764	65.5075
1999-01-20 06:00:00	1	6	5	-1	65.5075	1	-1	86.6764	65.5075
1999-01-20 07:00:00	1	7	6	-1	61.1516	1	0	93.1299	61.1516
1999-01-20 08:00:00	1	8	5	0	70.4031	2	0	86.7753	70.4031
1999-01-20 09:00:00	1	9				1	0	93.1299
1999-01-20 10:00:00	1	10	4	1	81.0297	3	1	86.8728	81.0297
1999-01-20 11:00:00	1	11	2	2	100	3	2	93.2344	100
1999-01-20 12:00:00	1	12	3	3	100	5	2	81.1633	100
1999-01-20 13:00:00	1	13	4	3	93.2855	3	2	93.2344	93.2855
1999-01-20 14:00:00	1	14	4	3	93.2855	3	2	93.2344	93.2855
1999-01-20 15:00:00	1	15	5	2	81.1633	3	2	93.2344	81.1633
1999-01-20 16:00:00	1	16	5	2	81.1633	4	2	86.9689	81.1633
1999-01-20 17:00:00	1	17	5	3	87.0636	4	2	86.9689	87.0636
1999-01-20 18:00:00	1	18	5	2	81.1633	3	2	93.2344	81.1633
1999-01-20 19:00:00	1	19	5	1	75.6158	3	2	93.2344	75.6158
1999-01-20 20:00:00	1	20	2	2	100	3	2	93.2344	100
1999-01-20 21:00:00	1	21	2	2	100	3	2	93.2344	100
1999-01-20 22:00:00	1	22	2	2	100	1	1	100	100
1999-01-20 23:00:00	1	23				1	0	93.1299
1999-01-21	1	0	3	2	93.2344	0	0	100	93.2344
1999-01-21 01:00:00	1	1	3	2	93.2344	1	0	93.1299	93.2344
1999-01-21 02:00:00	1	2	1	0	93.1299	1	0	93.1299	93.1299
1999-01-21 03:00:00	1	3	1	0	93.1299	1	0	93.1299	93.1299
1999-01-21 04:00:00	1	4	1	0	93.1299	0	0	100	93.1299
1999-01-21 05:00:00	1	5	1	0	93.1299	1	-1	86.6764	93.1299
1999-01-21 06:00:00	1	6	0	-2	86.576	1	-2	80.6176	86.576
1999-01-21 07:00:00	1	7	-1	-1	100	1	-1	86.6764	100
1999-01-21 08:00:00	1	8	-1	-1	100	0	-1	93.0764	100
1999-01-21 09:00:00	1	9	-1	-1	100	0	-1	93.0764	100
1999-01-21 10:00:00	1	10	-1	-1	100	0	-1	93.0764	100
1999-01-21 11:00:00	1	11	-1	-1	100	0	-1	93.0764	100
1999-01-21 12:00:00	1	12	-1	-1	100	0	-1	93.0764	100
1999-01-21 13:00:00	1	13	0	-2	86.576	0	-1	93.0764	86.576
1999-01-21 14:00:00	1	14				-1	-1	100
1999-01-21 15:00:00	1	15	0	-1	93.0764	-1	-1	100	93.0764
1999-01-21 16:00:00	1	16	0	-2	86.576	0	-2	86.576	86.576
1999-01-21 17:00:00	1	17	0	-3	80.4763	1	-2	80.6176	80.4763
1999-01-21 18:00:00	1	18
1999-01-21 19:00:00	1	19
1999-01-21 20:00:00	1	20
1999-01-21 21:00:00	1	21
1999-01-21 22:00:00	1	22
1999-01-21 23:00:00	1	23	-2	-4	86.3705	-1	-3	86.474	86.3705
1999-01-22	1	0	-2	-4	86.3705	-1	-3	86.474	86.3705
1999-01-22 01:00:00	1	1	-2	-4	86.3705	-2	-3	92.9669	86.3705
1999-01-22 02:00:00	1	2	-2	-4	86.3705	-2	-3	92.9669	86.3705
1999-01-22 03:00:00	1	3	-2	-3	92.9669	-2	-3	92.9669	92.9669
1999-01-22 04:00:00	1	4	-3	-3	100	-2	-3	92.9669	100
1999-01-22 05:00:00	1	5	-5	-6	92.796	-2	-4	86.3705	92.796
1999-01-22 06:00:00	1	6	-2	-4	86.3705	-2	-4	86.3705	86.3705
1999-01-22 07:00:00	1	7	-2	-4	86.3705	-2	-3	92.9669	86.3705
1999-01-22 08:00:00	1	8	-3	-5	86.2654	-3	-4	92.9108	86.2654
1999-01-22 09:00:00	1	9	-3	-4	92.9108	-2	-3	92.9669	92.9108
1999-01-22 10:00:00	1	10	-2	-3	92.9669	-1	-3	86.474	92.9669
1999-01-22 11:00:00	1	11	-1	-3	86.474	0	-3	80.4763	86.474
1999-01-22 12:00:00	1	12	1	-4	69.6017	1	-3	74.9327	69.6017
1999-01-22 13:00:00	1	13	1	-4	69.6017	2	-4	64.8354	69.6017
1999-01-22 14:00:00	1	14	2	-4	64.8354	2	-3	69.8061	64.8354
1999-01-22 15:00:00	1	15	2	-4	64.8354	2	-3	69.8061	64.8354
1999-01-22 16:00:00	1	16	2	-4	64.8354	2	-4	64.8354	64.8354
1999-01-22 17:00:00	1	17	2	-4	64.8354	2	-4	64.8354	64.8354
1999-01-22 18:00:00	1	18	1	-4	69.6017	1	-4	69.6017	69.6017
1999-01-22 19:00:00	1	19				1	-3	74.9327
1999-01-22 20:00:00	1	20	1	-3	74.9327	0	-3	80.4763	74.9327
1999-01-22 21:00:00	1	21	-1	-3	86.474	0	-3	80.4763	86.474
1999-01-22 22:00:00	1	22	1	-4	69.6017	-1	-2	93.0221	69.6017
1999-01-22 23:00:00	1	23	3	-5	56.08	1	-2	80.6176	56.08
1999-01-23	1	0	3	-5	56.08	-1	-1	100	56.08
1999-01-23 01:00:00	1	1	4	-5	52.2871	-1	-1	100	52.2871
1999-01-23 02:00:00	1	2	5	-5	48.7741	1	-2	80.6176	48.7741
1999-01-23 03:00:00	1	3	4	-5	52.2871	6	-5	45.5185	52.2871
1999-01-23 04:00:00	1	4	4	-5	52.2871	5	-4	52.5606	52.2871
1999-01-23 05:00:00	1	5	4	-5	52.2871	6	-4	49.0557	52.2871
1999-01-23 06:00:00	1	6	4	-5	52.2871	4	-4	56.3424	52.2871
1999-01-23 07:00:00	1	7	4	-5	52.2871	6	-5	45.5185	52.2871
1999-01-23 08:00:00	1	8	4	-5	52.2871	5	-6	45.2285	52.2871
1999-01-23 09:00:00	1	9	4	-5	52.2871	7	-5	42.4999	52.2871
1999-01-23 10:00:00	1	10	5	-6	45.2285	8	-6	36.8058	45.2285
1999-01-23 11:00:00	1	11	6	-5	45.5185	8	-4	42.7906	45.5185
1999-01-23 12:00:00	1	12	8	-5	39.6996	4	-2	65.2863	39.6996
1999-01-23 13:00:00	1	13	8	-4	42.7906	3	-2	70.0077	42.7906
1999-01-23 14:00:00	1	14	6	-3	52.8311	3	-1	75.279	52.8311
1999-01-23 15:00:00	1	15	5	-3	56.6018	1	-1	86.6764	56.6018
1999-01-23 16:00:00	1	16	2	-2	75.107	0	0	100	75.107
1999-01-23 17:00:00	1	17	1	-1	86.6764	0	-1	93.0764	86.6764
1999-01-23 18:00:00	1	18	-1	-1	100	0	-1	93.0764	100
1999-01-23 19:00:00	1	19	-1	-1	100	-1	-1	100	100
1999-01-23 20:00:00	1	20	-1	-1	100	0	-1	93.0764	100
1999-01-23 21:00:00	1	21	-1	-1	100	0	-1	93.0764	100
1999-01-23 22:00:00	1	22	-1	-1	100				100
1999-01-23 23:00:00	1	23	-1	-1	100	-1	-1	100	100
1999-01-24	1	0	-1	-1	100	-1	-1	100	100
1999-01-24 01:00:00	1	1				-2	-2	100
1999-01-24 02:00:00	1	2				-2	-3	92.9669
1999-01-24 03:00:00	1	3	-1	-1	100	-2	-3	92.9669	100
1999-01-24 04:00:00	1	4	-1	-1	100	-2	-3	92.9669	100
1999-01-24 05:00:00	1	5	-1	-1	100	-3	-3	100	100
1999-01-24 06:00:00	1	6				-3	-3	100
1999-01-24 07:00:00	1	7	-3	-3	100	-3	-4	92.9108	100
1999-01-24 08:00:00	1	8	-3	-3	100	-3	-3	100	100
1999-01-24 09:00:00	1	9	-3	-3	100	-3	-4	92.9108	100
1999-01-24 10:00:00	1	10	-3	-3	100	-3	-4	92.9108	100
1999-01-24 11:00:00	1	11	-3	-3	100	-3	-4	92.9108	100
1999-01-24 12:00:00	1	12	-2	-3	92.9669	-2	-3	92.9669	92.9669
1999-01-24 13:00:00	1	13	-2	-3	92.9669	-2	-3	92.9669	92.9669
1999-01-24 14:00:00	1	14	-2	-4	86.3705	-2	-3	92.9669	86.3705
1999-01-24 15:00:00	1	15	-2	-3	92.9669	-2	-3	92.9669	92.9669
1999-01-24 16:00:00	1	16	-2	-4	86.3705	-2	-3	92.9669	86.3705
1999-01-24 17:00:00	1	17	-2	-3	92.9669	-2	-3	92.9669	92.9669
1999-01-24 18:00:00	1	18	-3	-5	86.2654	-5	-5	100	86.2654
1999-01-24 19:00:00	1	19	-3	-4	92.9108	-7	-8	92.6773	92.9108
1999-01-24 20:00:00	1	20	-3	-4	92.9108	-6	-7	92.7371	92.9108
1999-01-24 21:00:00	1	21	-3	-4	92.9108	-6	-7	92.7371	92.9108
1999-01-24 22:00:00	1	22	-4	-4	100	-8	-9	92.6165	100
1999-01-24 23:00:00	1	23	-5	-5	100	-7	-8	92.6773	100
1999-01-25	1	0	-3	-3	100	-7	-8	92.6773	100
1999-01-25 01:00:00	1	1				-7	-8	92.6773
1999-01-25 02:00:00	1	2	-3	-3	100	-7	-8	92.6773	100
1999-01-25 03:00:00	1	3	-4	-4	100	-7	-9	85.8282	100
1999-01-25 04:00:00	1	4	-4	-4	100	-8	-9	92.6165	100
1999-01-25 05:00:00	1	5	-4	-4	100				100
1999-01-25 06:00:00	1	6	-4	-4	100	-8	-9	92.6165	100
1999-01-25 07:00:00	1	7	-4	-4	100	-8	-9	92.6165	100
1999-01-25 08:00:00	1	8	-4	-5	92.8539	-8	-9	92.6165	92.8539
1999-01-25 09:00:00	1	9	-3	-4	92.9108	-8	-10	85.7146	92.9108
1999-01-25 10:00:00	1	10	-3	-4	92.9108	-7	-10	79.4262	92.9108
1999-01-25 11:00:00	1	11	-2	-4	86.3705	-7	-9	85.8282	86.3705
1999-01-25 12:00:00	1	12	-1	-4	80.3328	-6	-9	79.583	80.3328
1999-01-25 13:00:00	1	13	-2	-4	86.3705	-5	-8	79.7375	86.3705
1999-01-25 14:00:00	1	14	0	-4	74.756	-5	-8	79.7375	74.756
1999-01-25 15:00:00	1	15	-1	-4	80.3328	-5	-8	79.7375	80.3328
1999-01-25 16:00:00	1	16	-1	-3	86.474	-4	-8	74.0235	86.474
1999-01-25 17:00:00	1	17	-1	-4	80.3328	-6	-9	79.583	80.3328
1999-01-25 18:00:00	1	18	-3	-5	86.2654	-6	-8	85.9401	86.2654
1999-01-25 19:00:00	1	19				-6	-8	85.9401
1999-01-25 20:00:00	1	20	-3	-4	92.9108	-7	-8	92.6773	92.9108
1999-01-25 21:00:00	1	21	-3	-4	92.9108	-6	-8	85.9401	92.9108
1999-01-25 22:00:00	1	22	-3	-5	86.2654	-6	-8	85.9401	86.2654
1999-01-25 23:00:00	1	23	-4	-6	86.1586	-6	-7	92.7371	86.1586
1999-01-26	1	0	-3	-5	86.2654	-6	-7	92.7371	86.2654
1999-01-26 01:00:00	1	1	-4	-5	92.8539	-6	-7	92.7371	92.8539
1999-01-26 02:00:00	1	2	-4	-5	92.8539	-6	-8	85.9401	92.8539
1999-01-26 03:00:00	1	3	-3	-5	86.2654	-7	-8	92.6773	86.2654
1999-01-26 04:00:00	1	4	-4	-4	100	-7	-8	92.6773	100
1999-01-26 05:00:00	1	5	-4	-4	100	-7	-8	92.6773	100
1999-01-26 06:00:00	1	6				-7	-8	92.6773
1999-01-26 07:00:00	1	7				-5	-7	86.0502
1999-01-26 08:00:00	1	8	-3	-3	100	-6	-7	92.7371	100
1999-01-26 09:00:00	1	9	-3	-3	100	-4	-6	86.1586	100
1999-01-26 10:00:00	1	10	-1	-1	100	-4	-5	92.8539	100
1999-01-26 11:00:00	1	11				-2	-3	92.9669
1999-01-26 12:00:00	1	12	0	-2	86.576	-1	-2	93.0221	86.576
1999-01-26 13:00:00	1	13	-1	-1	100	-1	-2	93.0221	100
1999-01-26 14:00:00	1	14	-1	-1	100	-1	-2	93.0221	100
1999-01-26 15:00:00	1	15	0	0	100	0	-1	93.0764	100
1999-01-26 16:00:00	1	16	0	0	100	0	-1	93.0764	100
1999-01-26 17:00:00	1	17				0	-1	93.0764
1999-01-26 18:00:00	1	18	0	0	100	-1	-1	100	100
1999-01-26 19:00:00	1	19	-1	-1	100	-1	-1	100	100
1999-01-26 20:00:00	1	20	0	0	100	-1	-1	100	100
1999-01-26 21:00:00	1	21	-1	-1	100	-1	-2	93.0221	100
1999-01-26 22:00:00	1	22	-1	-1	100	-1	-2	93.0221	100
1999-01-26 23:00:00	1	23	-2	-2	100	-1	-2	93.0221	100
1999-01-27	1	0				-2	-2	100
1999-01-27 01:00:00	1	1	-2	-2	100	-3	-4	92.9108	100
1999-01-27 02:00:00	1	2	-2	-2	100	-3	-4	92.9108	100
1999-01-27 03:00:00	1	3	-2	-2	100	-3	-5	86.2654	100
1999-01-27 04:00:00	1	4	-3	-3	100	-4	-6	86.1586	100
1999-01-27 05:00:00	1	5	-4	-4	100	-7	-8	92.6773	100
1999-01-27 06:00:00	1	6	-4	-4	100	-6	-9	79.583	100
1999-01-27 07:00:00	1	7	-6	-6	100	-6	-8	85.9401	100
1999-01-27 08:00:00	1	8	-6	-6	100	-6	-8	85.9401	100
1999-01-27 09:00:00	1	9	-6	-6	100	-6	-7	92.7371	100
1999-01-27 10:00:00	1	10	-5	-6	92.796	-6	-7	92.7371	92.796
1999-01-27 11:00:00	1	11	-5	-6	92.796	-5	-7	86.0502	92.796
1999-01-27 12:00:00	1	12	-4	-6	86.1586	-5	-7	86.0502	86.1586
1999-01-27 13:00:00	1	13	-3	-5	86.2654	-4	-7	79.8897	86.2654
1999-01-27 14:00:00	1	14	-4	-6	86.1586	-3	-7	74.2106	86.1586
1999-01-27 15:00:00	1	15	-3	-5	86.2654	-4	-7	79.8897	86.2654
1999-01-27 16:00:00	1	16	-2	-6	74.3949	-4	-8	74.0235	74.3949
1999-01-27 17:00:00	1	17	-4	-6	86.1586	-6	-8	85.9401	86.1586
1999-01-27 18:00:00	1	18				-7	-8	92.6773
1999-01-27 19:00:00	1	19	-5	-7	86.0502	-9	-11	85.5991	86.0502
1999-01-27 20:00:00	1	20	-6	-7	92.7371	-11	-12	92.4279	92.7371
1999-01-27 21:00:00	1	21	-8	-8	100	-12	-14	85.2411	100
1999-01-27 22:00:00	1	22	-8	-8	100	-9	-11	85.5991	100
1999-01-27 23:00:00	1	23	-8	-8	100	-9	-11	85.5991	100
1999-01-28	1	0	-9	-9	100	-16	-17	92.0913	100
1999-01-28 01:00:00	1	1	-10	-11	92.4919	-17	-19	84.6034	92.4919
1999-01-28 02:00:00	1	2	-10	-11	92.4919	-18	-19	91.9481	92.4919
1999-01-28 03:00:00	1	3	-9	-10	92.5547	-16	-18	84.7353	92.5547
1999-01-28 04:00:00	1	4	-8	-10	85.7146	-14	-15	92.2295	85.7146
1999-01-28 05:00:00	1	5	-8	-10	85.7146	-13	-15	85.1179	85.7146
1999-01-28 06:00:00	1	6	-10	-11	92.4919	-16	-17	92.0913	92.4919
1999-01-28 07:00:00	1	7	-9	-11	85.5991	-18	-20	84.4692	85.5991
1999-01-28 08:00:00	1	8	-10	-12	85.4817	-16	-18	84.7353	85.4817
1999-01-28 09:00:00	1	9	-9	-11	85.5991	-15	-17	84.865	85.5991
1999-01-28 10:00:00	1	10
1999-01-28 11:00:00	1	11	-6	-10	73.6413	-11	-13	85.3624	73.6413
1999-01-28 12:00:00	1	12	-5	-9	73.8338	-9	-12	79.1052	73.8338
1999-01-28 13:00:00	1	13	-4	-9	68.5378	-8	-12	73.2477	68.5378
1999-01-28 14:00:00	1	14	-3	-8	68.7564	-8	-11	79.2669	68.7564
1999-01-28 15:00:00	1	15	-3	-8	68.7564	-7	-11	73.4459	68.7564
1999-01-28 16:00:00	1	16	-3	-8	68.7564				68.7564
1999-01-28 17:00:00	1	17	-4	-7	79.8897	-7	-11	73.4459	79.8897
1999-01-28 18:00:00	1	18	-5	-8	79.7375	-10	-12	85.4817	79.7375
1999-01-28 19:00:00	1	19	-8	-9	92.6165	-13	-14	92.2968	92.6165
1999-01-28 20:00:00	1	20	-6	-9	79.583	-14	-16	84.9925	79.583
1999-01-28 21:00:00	1	21	-8	-10	85.7146	-13	-14	92.2968	85.7146
1999-01-28 22:00:00	1	22	-7	-10	79.4262	-16	-17	92.0913	79.4262
1999-01-28 23:00:00	1	23	-9	-11	85.5991	-13	-14	92.2968	85.5991
1999-01-29	1	0	-9	-11	85.5991	-17	-18	92.0203	85.5991
1999-01-29 01:00:00	1	1	-10	-12	85.4817	-16	-18	84.7353	85.4817
1999-01-29 02:00:00	1	2	-8	-11	79.2669	-15	-17	84.865	79.2669
1999-01-29 03:00:00	1	3	-9	-11	85.5991	-16	-17	92.0913	85.5991
1999-01-29 04:00:00	1	4	-9	-12	79.1052	-17	-18	92.0203	79.1052
1999-01-29 05:00:00	1	5	-9	-11	85.5991	-16	-17	92.0913	85.5991
1999-01-29 06:00:00	1	6	-10	-12	85.4817	-16	-18	84.7353	85.4817
1999-01-29 07:00:00	1	7	-10	-13	78.9409	-17	-18	92.0203	78.9409
1999-01-29 08:00:00	1	8	-10	-13	78.9409	-17	-18	92.0203	78.9409
1999-01-29 09:00:00	1	9	-9	-13	73.0465	-17	-18	92.0203	73.0465
1999-01-29 10:00:00	1	10
1999-01-29 11:00:00	1	11	-7	-12	67.8634	-13	-14	92.2968	67.8634
1999-01-29 12:00:00	1	12	-5	-9	73.8338	-12	-13	92.3629	73.8338
1999-01-29 13:00:00	1	13	-3	-7	74.2106	-9	-12	79.1052	74.2106
1999-01-29 14:00:00	1	14	-2	-6	74.3949	-9	-12	79.1052	74.3949
1999-01-29 15:00:00	1	15	-2	-7	68.9721	-8	-11	79.2669	68.9721
1999-01-29 16:00:00	1	16	-2	-8	63.8983	-8	-11	79.2669	63.8983
1999-01-29 17:00:00	1	17	-2	-7	68.9721	-8	-11	79.2669	68.9721
1999-01-29 18:00:00	1	18	-5	-8	79.7375	-9	-12	79.1052	79.7375
1999-01-29 19:00:00	1	19				-13	-14	92.2968
1999-01-29 20:00:00	1	20	-6	-9	79.583	-13	-16	78.4324	79.583
1999-01-29 21:00:00	1	21	-6	-10	73.6413	-14	-16	84.9925	73.6413
1999-01-29 22:00:00	1	22	-6	-10	73.6413	-14	-15	92.2295	73.6413
1999-01-29 23:00:00	1	23	-7	-10	79.4262	-15	-16	92.161	79.4262
1999-01-30	1	0	-8	-10	85.7146	-16	-17	92.0913	85.7146
1999-01-30 01:00:00	1	1	-8	-10	85.7146	-16	-18	84.7353	85.7146
1999-01-30 02:00:00	1	2	-7	-9	85.8282	-16	-17	92.0913	85.8282
1999-01-30 03:00:00	1	3	-9	-11	85.5991	-17	-18	92.0203	85.5991
1999-01-30 04:00:00	1	4	-6	-10	73.6413	-16	-17	92.0913	73.6413
1999-01-30 05:00:00	1	5	-7	-11	73.4459	-16	-18	84.7353	73.4459
1999-01-30 06:00:00	1	6	-8	-10	85.7146	-16	-17	92.0913	85.7146
1999-01-30 07:00:00	1	7	-8	-11	79.2669	-16	-17	92.0913	79.2669
1999-01-30 08:00:00	1	8	-9	-11	85.5991	-17	-19	84.6034	85.5991
1999-01-30 09:00:00	1	9	-8	-11	79.2669	-17	-18	92.0203	79.2669
1999-01-30 10:00:00	1	10	-7	-11	73.4459				73.4459
1999-01-30 11:00:00	1	11	-5	-11	63.1627	-14	-16	84.9925	63.1627
1999-01-30 12:00:00	1	12	-3	-8	68.7564	-12	-14	85.2411	68.7564
1999-01-30 13:00:00	1	13	-2	-7	68.9721	-11	-13	85.3624	68.9721
1999-01-30 14:00:00	1	14	0	-7	59.6719	-9	-12	79.1052	59.6719
1999-01-30 15:00:00	1	15	0	-6	64.3729	-9	-12	79.1052	64.3729
1999-01-30 16:00:00	1	16
1999-01-30 17:00:00	1	17	-2	-6	74.3949	-8	-12	73.2477	74.3949
1999-01-30 18:00:00	1	18	-4	-5	92.8539	-12	-14	85.2411	92.8539
1999-01-30 19:00:00	1	19	-5	-6	92.796	-14	-15	92.2295	92.796
1999-01-30 20:00:00	1	20	-6	-6	100	-14	-16	84.9925	100
1999-01-30 21:00:00	1	21	-3	-7	74.2106	-16	-17	92.0913	74.2106
1999-01-30 22:00:00	1	22	-6	-8	85.9401	-14	-16	84.9925	85.9401
1999-01-30 23:00:00	1	23	-6	-7	92.7371	-15	-17	84.865	92.7371
1999-01-31	1	0	-3	-7	74.2106	-14	-16	84.9925	74.2106
1999-01-31 01:00:00	1	1	-5	-5	100	-13	-14	92.2968	100
1999-01-31 02:00:00	1	2	-3	-7	74.2106	-13	-16	78.4324	74.2106
1999-01-31 03:00:00	1	3	-3	-8	68.7564	-14	-16	84.9925	68.7564
1999-01-31 04:00:00	1	4	-3	-8	68.7564	-14	-15	92.2295	68.7564
1999-01-31 05:00:00	1	5	-4	-8	74.0235	-13	-15	85.1179	74.0235
1999-01-31 06:00:00	1	6	-2	-8	63.8983	-14	-15	92.2295	63.8983
1999-01-31 07:00:00	1	7	-4	-7	79.8897	-13	-14	92.2968	79.8897
1999-01-31 08:00:00	1	8	-3	-7	74.2106	-12	-13	92.3629	74.2106
1999-01-31 09:00:00	1	9	-1	-7	64.1371	-11	-13	85.3624	64.1371
1999-01-31 10:00:00	1	10	-1	-7	64.1371	-11	-12	92.4279	64.1371
1999-01-31 11:00:00	1	11	0	-7	59.6719	-9	-11	85.5991	59.6719
1999-01-31 12:00:00	1	12	3	-6	52.0107	-8	-10	85.7146	52.0107
1999-01-31 13:00:00	1	13	2	-5	60.1772	-7	-10	79.4262	60.1772
1999-01-31 14:00:00	1	14	6	-6	42.2066	-5	-8	79.7375	42.2066
1999-01-31 15:00:00	1	15	1	-3	74.9327	-5	-8	79.7375	74.9327
1999-01-31 16:00:00	1	16	2	-5	60.1772	-4	-8	74.0235	60.1772
1999-01-31 17:00:00	1	17	1	-4	69.6017	-5	-8	79.7375	69.6017
1999-01-31 18:00:00	1	18	0	-4	74.756	-5	-8	79.7375	74.756
1999-01-31 19:00:00	1	19	-1	-3	86.474	-4	-7	79.8897	86.474
1999-01-31 20:00:00	1	20	-1	-3	86.474	-4	-7	79.8897	86.474
1999-01-31 21:00:00	1	21	-1	-1	100	-3	-5	86.2654	100
1999-01-31 22:00:00	1	22				-3	-5	86.2654
1999-01-31 23:00:00	1	23	-1	-1	100	-3	-4	92.9108	100
1999-02-01	2	0	-2	-2	100	-3	-4	92.9108	100
1999-02-01 01:00:00	2	1	-2	-2	100	-1	-1	100	100
1999-02-01 02:00:00	2	2	-1	-1	100	-2	-2	100	100
1999-02-01 03:00:00	2	3	-1	-1	100	-2	-3	92.9669	100
1999-02-01 04:00:00	2	4	-1	-1	100	-2	-3	92.9669	100
1999-02-01 05:00:00	2	5	-2	-2	100	-2	-2	100	100
1999-02-01 06:00:00	2	6	-2	-2	100	-1	-2	93.0221	100
1999-02-01 07:00:00	2	7	-2	-2	100	1	-4	69.6017	100
1999-02-01 08:00:00	2	8	-2	-2	100	-2	-9	59.1541	100
1999-02-01 09:00:00	2	9	-2	-2	100	-4	-10	63.4111	100
1999-02-01 10:00:00	2	10	-1	-4	80.3328				80.3328
1999-02-01 11:00:00	2	11				-2	-10	54.721
1999-02-01 12:00:00	2	12	-1	-5	74.5767	-1	-8	59.4146	74.5767
1999-02-01 13:00:00	2	13	-2	-6	74.3949	0	-8	55.2742	74.3949
1999-02-01 14:00:00	2	14	-1	-5	74.5767	-1	-8	59.4146	74.5767
1999-02-01 15:00:00	2	15	-1	-8	59.4146	-1	-8	59.4146	59.4146
1999-02-01 16:00:00	2	16	-1	-6	69.1848	-2	-8	63.8983	69.1848
1999-02-01 17:00:00	2	17	-1	-6	69.1848	-4	-8	74.0235	69.1848
1999-02-01 18:00:00	2	18	-2	-6	74.3949	-6	-9	79.583	74.3949
1999-02-01 19:00:00	2	19	-5	-7	86.0502	-8	-9	92.6165	86.0502
1999-02-01 20:00:00	2	20	-4	-9	68.5378	-11	-13	85.3624	68.5378
1999-02-01 21:00:00	2	21	-5	-10	68.3161	-13	-14	92.2968	68.3161
1999-02-01 22:00:00	2	22	-5	-11	63.1627	-12	-13	92.3629	63.1627
1999-02-01 23:00:00	2	23	-6	-10	73.6413	-13	-15	85.1179	73.6413
1999-02-02	2	0	-8	-10	85.7146	-13	-14	92.2968	85.7146
1999-02-02 01:00:00	2	1	-7	-10	79.4262	-14	-16	84.9925	79.4262
1999-02-02 02:00:00	2	2	-8	-11	79.2669	-17	-18	92.0203	79.2669
1999-02-02 03:00:00	2	3	-8	-11	79.2669	-16	-17	92.0913	79.2669
1999-02-02 04:00:00	2	4	-8	-11	79.2669	-16	-18	84.7353	79.2669
1999-02-02 05:00:00	2	5	-8	-12	73.2477	-14	-16	84.9925	73.2477
1999-02-02 06:00:00	2	6	-9	-12	79.1052	-17	-18	92.0203	79.1052
1999-02-02 07:00:00	2	7	-9	-12	79.1052	-17	-18	92.0203	79.1052
1999-02-02 08:00:00	2	8	-8	-12	73.2477	-18	-19	91.9481	73.2477
1999-02-02 09:00:00	2	9	-8	-12	73.2477	-14	-15	92.2295	73.2477
1999-02-02 10:00:00	2	10	-6	-11	68.0914	-12	-14	85.2411	68.0914
1999-02-02 11:00:00	2	11				-10	-11	92.4919
1999-02-02 12:00:00	2	12	-3	-8	68.7564	-8	-11	79.2669	68.7564
1999-02-02 13:00:00	2	13	0	-9	51.1627	-6	-9	79.583	51.1627
1999-02-02 14:00:00	2	14	0	-8	55.2742	-4	-8	74.0235	55.2742
1999-02-02 15:00:00	2	15	1	-8	51.4485	-2	-7	68.9721	51.4485
1999-02-02 16:00:00	2	16	0	-8	55.2742	-2	-7	68.9721	55.2742
1999-02-02 17:00:00	2	17	0	-8	55.2742	-2	-7	68.9721	55.2742
1999-02-02 18:00:00	2	18	0	-7	59.6719	-2	-7	68.9721	59.6719
1999-02-02 19:00:00	2	19	1	-8	51.4485	-1	-7	64.1371	51.4485
1999-02-02 20:00:00	2	20	2	-8	47.9116	-2	-6	74.3949	47.9116
1999-02-02 21:00:00	2	21	1	-7	55.5459	0	-7	59.6719	55.5459
1999-02-02 22:00:00	2	22	0	-6	64.3729	3	-6	52.0107	64.3729
1999-02-02 23:00:00	2	23	1	-6	59.9261	4	-5	52.2871	59.9261
1999-02-03	2	0	2	-7	51.7312	4	-6	48.4896	51.7312
1999-02-03 01:00:00	2	1	2	-7	51.7312	4	-4	56.3424	51.7312
1999-02-03 02:00:00	2	2	2	-7	51.7312	4	-4	56.3424	51.7312
1999-02-03 03:00:00	2	3	2	-7	51.7312	2	-4	64.8354	51.7312
1999-02-03 04:00:00	2	4	2	-7	51.7312	1	-4	69.6017	51.7312
1999-02-03 05:00:00	2	5	2	-7	51.7312	1	-4	69.6017	51.7312
1999-02-03 06:00:00	2	6	2	-6	55.8145	3	-3	65.0622	55.8145
1999-02-03 07:00:00	2	7	2	-5	60.1772	-1	-6	69.1848	60.1772
1999-02-03 08:00:00	2	8	2	-5	60.1772	0	-4	74.756	60.1772
1999-02-03 09:00:00	2	9				0	-6	64.3729
1999-02-03 10:00:00	2	10	3	-4	60.4252	1	-6	59.9261	60.4252
1999-02-03 11:00:00	2	11	3	-4	60.4252	3	-5	56.08	60.4252
1999-02-03 12:00:00	2	12	5	-5	48.7741	3	-4	60.4252	48.7741
1999-02-03 13:00:00	2	13	5	-7	41.9105	2	-4	64.8354	41.9105
1999-02-03 14:00:00	2	14	5	-5	48.7741	4	-6	48.4896	48.7741
1999-02-03 15:00:00	2	15	4	-6	48.4896	4	-6	48.4896	48.4896
1999-02-03 16:00:00	2	16	4	-6	48.4896	4	-6	48.4896	48.4896
1999-02-03 17:00:00	2	17	4	-7	44.9356	2	-6	55.8145	44.9356
1999-02-03 18:00:00	2	18	0	-7	59.6719	-1	-6	69.1848	59.6719
1999-02-03 19:00:00	2	19	2	-6	55.8145	-5	-7	86.0502	55.8145
1999-02-03 20:00:00	2	20	0	-7	59.6719	-6	-8	85.9401	59.6719
1999-02-03 21:00:00	2	21	2	-8	47.9116	-6	-8	85.9401	47.9116
1999-02-03 22:00:00	2	22	2	-8	47.9116	-6	-8	85.9401	47.9116
1999-02-03 23:00:00	2	23	0	-8	55.2742	-5	-7	86.0502	55.2742
1999-02-04	2	0	-1	-7	64.1371	-5	-7	86.0502	64.1371
1999-02-04 01:00:00	2	1	0	-7	59.6719	-6	-7	92.7371	59.6719
1999-02-04 02:00:00	2	2	1	-7	55.5459	-5	-7	86.0502	55.5459
1999-02-04 03:00:00	2	3	0	-7	59.6719	-4	-6	86.1586	59.6719
1999-02-04 04:00:00	2	4	0	-6	64.3729	-4	-6	86.1586	64.3729
1999-02-04 05:00:00	2	5	1	-7	55.5459	-3	-6	80.0396	55.5459
1999-02-04 06:00:00	2	6	1	-6	59.9261	-3	-5	86.2654	59.9261
1999-02-04 07:00:00	2	7	2	-6	55.8145	-3	-4	92.9108	55.8145
1999-02-04 08:00:00	2	8	3	-6	52.0107	-3	-4	92.9108	52.0107
1999-02-04 09:00:00	2	9	2	-5	60.1772	-2	-4	86.3705	60.1772
1999-02-04 10:00:00	2	10	6	-7	39.1074	-2	-4	86.3705	39.1074
1999-02-04 11:00:00	2	11	4	-4	56.3424	-2	-4	86.3705	56.3424
1999-02-04 12:00:00	2	12	6	-6	42.2066	-1	-3	86.474	42.2066
1999-02-04 13:00:00	2	13	7	-6	39.4048	0	-2	86.576	39.4048
1999-02-04 14:00:00	2	14	5	-4	52.5606	2	-1	80.757	52.5606
1999-02-04 15:00:00	2	15				1	-2	80.6176
1999-02-04 16:00:00	2	16	6	-3	52.8311	1	-1	86.6764	52.8311
1999-02-04 17:00:00	2	17	4	0	75.4485	2	0	86.7753	75.4485
1999-02-04 18:00:00	2	18
1999-02-04 19:00:00	2	19
1999-02-04 20:00:00	2	20	4	1	81.0297	1	0	93.1299	81.0297
1999-02-04 21:00:00	2	21				1	0	93.1299
1999-02-04 22:00:00	2	22	3	2	93.2344	1	0	93.1299	93.2344
1999-02-04 23:00:00	2	23	2	2	100	1	0	93.1299	100
1999-02-05	2	0	2	2	100	0	0	100	100
1999-02-05 01:00:00	2	1				0	0	100
1999-02-05 02:00:00	2	2	0	0	100	-1	-1	100	100
1999-02-05 03:00:00	2	3	0	0	100	-1	-2	93.0221	100
1999-02-05 04:00:00	2	4	0	0	100	-1	-1	100	100
1999-02-05 05:00:00	2	5	0	0	100	-1	-2	93.0221	100
1999-02-05 06:00:00	2	6				-1	-2	93.0221
1999-02-05 07:00:00	2	7	0	0	100	-1	-2	93.0221	100
1999-02-05 08:00:00	2	8				-1	-2	93.0221
1999-02-05 09:00:00	2	9	-1	-1	100	-1	-1	100	100
1999-02-05 10:00:00	2	10				-1	-1	100
1999-02-05 11:00:00	2	11	0	0	100				100
1999-02-05 12:00:00	2	12	0	0	100	0	-2	86.576	100
1999-02-05 13:00:00	2	13	0	0	100	1	-2	80.6176	100
1999-02-05 14:00:00	2	14	0	0	100	1	-2	80.6176	100
1999-02-05 15:00:00	2	15	0	0	100	1	-2	80.6176	100
1999-02-05 16:00:00	2	16	1	1	100	1	-2	80.6176	100
1999-02-05 17:00:00	2	17	1	1	100	1	-1	86.6764	100
1999-02-05 18:00:00	2	18	1	1	100	0	-1	93.0764	100
1999-02-05 19:00:00	2	19	1	1	100	0	-1	93.0764	100
1999-02-05 20:00:00	2	20	0	0	100	-1	-2	93.0221	100
1999-02-05 21:00:00	2	21	1	0	93.1299	-4	-4	100	93.1299
1999-02-05 22:00:00	2	22	1	1	100	-1	-2	93.0221	100
1999-02-05 23:00:00	2	23	0	0	100	-2	-2	100	100
1999-02-06	2	0	0	0	100	-4	-4	100	100
1999-02-06 01:00:00	2	1	0	0	100	-6	-6	100	100
1999-02-06 02:00:00	2	2	-1	-1	100	-7	-7	100	100
1999-02-06 03:00:00	2	3	-1	-1	100	-4	-5	92.8539	100
1999-02-06 04:00:00	2	4	0	0	100				100
1999-02-06 05:00:00	2	5	-1	-1	100				100
1999-02-06 06:00:00	2	6	-1	-1	100	-2	-2	100	100
1999-02-06 07:00:00	2	7	-1	-1	100	-2	-2	100	100
1999-02-06 08:00:00	2	8	1	1	100	-2	-3	92.9669	100
1999-02-06 09:00:00	2	9	0	0	100	-2	-2	100	100
1999-02-06 10:00:00	2	10	3	1	86.8728	1	-1	86.6764	86.8728
1999-02-06 11:00:00	2	11	3	1	86.8728	1	0	93.1299	86.8728
1999-02-06 12:00:00	2	12	5	1	75.6158	2	1	93.1826	75.6158
1999-02-06 13:00:00	2	13
1999-02-06 14:00:00	2	14	6	0	65.7259	3	0	80.8943	65.7259
1999-02-06 15:00:00	2	15	6	-2	56.8583	4	-1	70.2067	56.8583
1999-02-06 16:00:00	2	16	7	-2	53.0986	5	-2	60.9124	53.0986
1999-02-06 17:00:00	2	17	6	-2	56.8583	4	-2	65.2863	56.8583
1999-02-06 18:00:00	2	18	4	-1	70.2067	4	0	75.4485	70.2067
1999-02-06 19:00:00	2	19	4	1	81.0297	3	1	86.8728	81.0297
1999-02-06 20:00:00	2	20	3	2	93.2344	2	1	93.1826	93.2344
1999-02-06 21:00:00	2	21	4	1	81.0297	2	1	93.1826	81.0297
1999-02-06 22:00:00	2	22	4	0	75.4485	3	1	86.8728	75.4485
1999-02-06 23:00:00	2	23	4	-1	70.2067	4	1	81.0297	70.2067
1999-02-07	2	0	4	-1	70.2067	5	0	70.4031	70.2067
1999-02-07 01:00:00	2	1	5	-1	65.5075	5	-1	65.5075	65.5075
1999-02-07 02:00:00	2	2	5	-1	65.5075	5	-1	65.5075	65.5075
1999-02-07 03:00:00	2	3	5	-1	65.5075	5	-1	65.5075	65.5075
1999-02-07 04:00:00	2	4	4	0	75.4485	4	0	75.4485	75.4485
1999-02-07 05:00:00	2	5	4	0	75.4485	4	0	75.4485	75.4485
1999-02-07 06:00:00	2	6	5	0	70.4031	6	0	65.7259	70.4031
1999-02-07 07:00:00	2	7	5	-1	65.5075	5	0	70.4031	65.5075
1999-02-07 08:00:00	2	8	5	-1	65.5075	5	-1	65.5075	65.5075
1999-02-07 09:00:00	2	9	6	-1	61.1516	6	0	65.7259	61.1516
1999-02-07 10:00:00	2	10	5	0	70.4031	6	0	65.7259	70.4031
1999-02-07 11:00:00	2	11	5	0	70.4031	5	0	70.4031	70.4031
1999-02-07 12:00:00	2	12	6	1	70.5969	6	-1	61.1516	70.5969
1999-02-07 13:00:00	2	13	7	0	61.388	6	0	65.7259	61.388
1999-02-07 14:00:00	2	14	7	0	61.388	8	0	57.3625	61.388
1999-02-07 15:00:00	2	15	7	0	61.388	9	0	53.6251	61.388
1999-02-07 16:00:00	2	16	8	1	61.6216	9	0	53.6251	61.6216
1999-02-07 17:00:00	2	17	8	0	57.3625	11	0	46.927	57.3625
1999-02-07 18:00:00	2	18	8	1	61.6216	11	0	46.927	61.6216
1999-02-07 19:00:00	2	19	9	-1	49.8832	11	0	46.927	49.8832
1999-02-07 20:00:00	2	20	7	1	65.9417	11	-1	43.6467	65.9417
1999-02-07 21:00:00	2	21				4	0	75.4485
1999-02-07 22:00:00	2	22	7	1	65.9417	4	0	75.4485	65.9417
1999-02-07 23:00:00	2	23	7	1	65.9417	5	0	70.4031	65.9417
1999-02-08	2	0	4	2	86.9689	5	0	70.4031	86.9689
1999-02-08 01:00:00	2	1	4	1	81.0297	6	-3	52.8311	81.0297
1999-02-08 02:00:00	2	2	4	1	81.0297	6	-1	61.1516	81.0297
1999-02-08 03:00:00	2	3	4	1	81.0297	3	-1	75.279	81.0297
1999-02-08 04:00:00	2	4	4	0	75.4485				75.4485
1999-02-08 05:00:00	2	5	2	-3	69.8061	1	-2	80.6176	69.8061
1999-02-08 06:00:00	2	6	2	-3	69.8061	2	-4	64.8354	69.8061
1999-02-08 07:00:00	2	7	2	-3	69.8061	1	-3	74.9327	69.8061
1999-02-08 08:00:00	2	8	2	-2	75.107	2	-4	64.8354	75.107
1999-02-08 09:00:00	2	9	0	-2	86.576	1	-2	80.6176	86.576
1999-02-08 10:00:00	2	10	1	-3	74.9327	1	-3	74.9327	74.9327
1999-02-08 11:00:00	2	11	2	-2	75.107	1	-3	74.9327	75.107
1999-02-08 12:00:00	2	12	2	-2	75.107	-1	-1	100	75.107
1999-02-08 13:00:00	2	13	3	-2	70.0077	0	-1	93.0764	70.0077
1999-02-08 14:00:00	2	14	3	-2	70.0077	-1	-2	93.0221	70.0077
1999-02-08 15:00:00	2	15	2	-2	75.107	-1	-2	93.0221	75.107
1999-02-08 16:00:00	2	16	-1	-1	100	-1	-2	93.0221	100
1999-02-08 17:00:00	2	17	0	0	100	-1	-2	93.0221	100
1999-02-08 18:00:00	2	18	-1	-1	100	-1	-2	93.0221	100
1999-02-08 19:00:00	2	19	-1	-1	100	-1	-2	93.0221	100
1999-02-08 20:00:00	2	20	1	1	100	-1	-2	93.0221	100
1999-02-08 21:00:00	2	21				-1	-2	93.0221
1999-02-08 22:00:00	2	22	0	0	100	-1	-1	100	100
1999-02-08 23:00:00	2	23	0	0	100	-1	-2	93.0221	100
1999-02-09	2	0	2	1	93.1826	-1	-1	100	93.1826
1999-02-09 01:00:00	2	1	1	1	100	-1	-1	100	100
1999-02-09 02:00:00	2	2	2	1	93.1826	-1	-2	93.0221	93.1826
1999-02-09 03:00:00	2	3	2	0	86.7753	-1	-2	93.0221	86.7753
1999-02-09 04:00:00	2	4	2	0	86.7753	-1	-1	100	86.7753
1999-02-09 05:00:00	2	5	5	0	70.4031	-2	-2	100	70.4031
1999-02-09 06:00:00	2	6	4	1	81.0297	-2	-3	92.9669	81.0297
1999-02-09 07:00:00	2	7	5	2	81.1633	-1	-2	93.0221	81.1633
1999-02-09 08:00:00	2	8	5	2	81.1633	-1	-1	100	81.1633
1999-02-09 09:00:00	2	9	7	2	70.7883	1	0	93.1299	70.7883
1999-02-09 10:00:00	2	10	9	1	57.6104	1	0	93.1299	57.6104
1999-02-09 11:00:00	2	11	10	1	53.8842	8	1	61.6216	53.8842
1999-02-09 12:00:00	2	12	11	0	46.927	9	0	53.6251	46.927
1999-02-09 13:00:00	2	13	12	0	43.927				43.927
1999-02-09 14:00:00	2	14	11	1	50.421				50.421
1999-02-09 15:00:00	2	15	13	0	41.1361	9	0	53.6251	41.1361
1999-02-09 16:00:00	2	16	13	2	47.4716	11	0	46.927	47.4716
1999-02-09 17:00:00	2	17	12	3	54.394	12	1	47.2006	54.394
1999-02-09 18:00:00	2	18				11	1	50.421
1999-02-09 19:00:00	2	19	12	1	47.2006	11	2	54.1405	47.2006
1999-02-09 20:00:00	2	20	11	2	54.1405	13	1	44.2046	54.1405
1999-02-09 21:00:00	2	21	11	1	50.421	4	2	86.9689	50.421
1999-02-09 22:00:00	2	22	3	1	86.8728				86.8728
1999-02-09 23:00:00	2	23	0	0	100	1	0	93.1299	100
1999-02-10	2	0	-1	-1	100	-1	-2	93.0221	100
1999-02-10 01:00:00	2	1				-3	-3	100
1999-02-10 02:00:00	2	2	-5	-5	100	-3	-4	92.9108	100
1999-02-10 03:00:00	2	3	-5	-5	100	-3	-5	86.2654	100
1999-02-10 04:00:00	2	4	-6	-6	100	-4	-6	86.1586	100
1999-02-10 05:00:00	2	5	-6	-7	92.7371	-5	-6	92.796	92.7371
1999-02-10 06:00:00	2	6	-6	-9	79.583	-6	-8	85.9401	79.583
1999-02-10 07:00:00	2	7	-6	-10	73.6413	-6	-12	62.9109	73.6413
1999-02-10 08:00:00	2	8				-7	-13	62.6558
1999-02-10 09:00:00	2	9	-6	-10	73.6413	-8	-13	67.6323	73.6413
1999-02-10 10:00:00	2	10	-6	-12	62.9109	-6	-13	58.0787	62.9109
1999-02-10 11:00:00	2	11	-5	-12	58.3527	-5	-12	58.3527	58.3527
1999-02-10 12:00:00	2	12	-5	-12	58.3527	-6	-11	68.0914	58.3527
1999-02-10 13:00:00	2	13	-5	-12	58.3527	-5	-10	68.3161	58.3527
1999-02-10 14:00:00	2	14	-5	-11	63.1627	-4	-11	58.6232	63.1627
1999-02-10 15:00:00	2	15	-6	-8	85.9401	-4	-11	58.6232	85.9401
1999-02-10 16:00:00	2	16	-6	-9	79.583	-4	-10	63.4111	79.583
1999-02-10 17:00:00	2	17	-6	-10	73.6413	-6	-10	73.6413	73.6413
1999-02-10 18:00:00	2	18	-6	-10	73.6413	-7	-10	79.4262	73.6413
1999-02-10 19:00:00	2	19	-7	-10	79.4262	-7	-10	79.4262	79.4262
1999-02-10 20:00:00	2	20	-7	-11	73.4459	-6	-9	79.583	73.4459
1999-02-10 21:00:00	2	21	-7	-12	67.8634	-7	-9	85.8282	67.8634
1999-02-10 22:00:00	2	22	-8	-12	73.2477	-6	-10	73.6413	73.2477
1999-02-10 23:00:00	2	23	-8	-12	73.2477	-8	-11	79.2669	73.2477
1999-02-11	2	0	-9	-12	79.1052	-8	-11	79.2669	79.1052
1999-02-11 01:00:00	2	1	-9	-12	79.1052	-9	-11	85.5991	79.1052
1999-02-11 02:00:00	2	2	-9	-11	85.5991	-9	-12	79.1052	85.5991
1999-02-11 03:00:00	2	3	-9	-12	79.1052	-12	-14	85.2411	79.1052
1999-02-11 04:00:00	2	4	-11	-13	85.3624	-13	-14	92.2968	85.3624
1999-02-11 05:00:00	2	5	-12	-14	85.2411	-13	-15	85.1179	85.2411
1999-02-11 06:00:00	2	6	-13	-14	92.2968	-13	-15	85.1179	92.2968
1999-02-11 07:00:00	2	7	-12	-14	85.2411	-14	-16	84.9925	85.2411
1999-02-11 08:00:00	2	8	-13	-15	85.1179	-15	-17	84.865	85.1179
1999-02-11 09:00:00	2	9	-11	-15	72.635	-13	-16	78.4324	72.635
1999-02-11 10:00:00	2	10	-10	-14	72.8423	-12	-14	85.2411	72.8423
1999-02-11 11:00:00	2	11	-7	-12	67.8634	-10	-13	78.9409	67.8634
1999-02-11 12:00:00	2	12	-6	-12	62.9109	-9	-14	67.3978	62.9109
1999-02-11 13:00:00	2	13	-5	-12	58.3527	-8	-13	67.6323	58.3527
1999-02-11 14:00:00	2	14	-5	-11	63.1627	-7	-13	62.6558	63.1627
1999-02-11 15:00:00	2	15	-1	-11	47.0215	-7	-12	67.8634	47.0215
1999-02-11 16:00:00	2	16	-5	-12	58.3527	-7	-12	67.8634	58.3527
1999-02-11 17:00:00	2	17	-5	-11	63.1627	-7	-11	73.4459	63.1627
1999-02-11 18:00:00	2	18	-7	-12	67.8634	-9	-11	85.5991	67.8634
1999-02-11 19:00:00	2	19	-7	-12	67.8634	-13	-15	85.1179	67.8634
1999-02-11 20:00:00	2	20	-7	-12	67.8634	-11	-13	85.3624	67.8634
1999-02-11 21:00:00	2	21	-8	-12	73.2477	-12	-14	85.2411	73.2477
1999-02-11 22:00:00	2	22	-10	-14	72.8423	-13	-15	85.1179	72.8423
1999-02-11 23:00:00	2	23	-10	-14	72.8423	-14	-16	84.9925	72.8423
1999-02-12	2	0	-9	-13	73.0465	-15	-17	84.865	73.0465
1999-02-12 01:00:00	2	1	-9	-13	73.0465	-15	-17	84.865	73.0465
1999-02-12 02:00:00	2	2	-9	-14	67.3978	-14	-17	78.2574	67.3978
1999-02-12 03:00:00	2	3	-10	-13	78.9409	-13	-16	78.4324	78.9409
1999-02-12 04:00:00	2	4	-9	-14	67.3978	-13	-15	85.1179	67.3978
1999-02-12 05:00:00	2	5	-10	-14	72.8423	-13	-15	85.1179	72.8423
1999-02-12 06:00:00	2	6	-10	-14	72.8423	-16	-18	84.7353	72.8423
1999-02-12 07:00:00	2	7	-9	-13	73.0465	-16	-17	92.0913	73.0465
1999-02-12 08:00:00	2	8	-11	-14	78.7741	-16	-18	84.7353	78.7741
1999-02-12 09:00:00	2	9	-9	-13	73.0465	-13	-16	78.4324	73.0465
1999-02-12 10:00:00	2	10	-8	-13	67.6323	-11	-13	85.3624	67.6323
1999-02-12 11:00:00	2	11	-7	-13	62.6558	-9	-13	73.0465	62.6558
1999-02-12 12:00:00	2	12	-4	-12	54.1546	-9	-13	73.0465	54.1546
1999-02-12 13:00:00	2	13	-2	-11	50.5815	-8	-12	73.2477	50.5815
1999-02-12 14:00:00	2	14	-1	-11	47.0215	-7	-11	73.4459	47.0215
1999-02-12 15:00:00	2	15	-2	-10	54.721	-6	-12	62.9109	54.721
1999-02-12 16:00:00	2	16	-2	-9	59.1541	-6	-12	62.9109	59.1541
1999-02-12 17:00:00	2	17	-2	-9	59.1541	-6	-12	62.9109	59.1541
1999-02-12 18:00:00	2	18	-4	-10	63.4111	-7	-13	62.6558	63.4111
1999-02-12 19:00:00	2	19	-7	-11	73.4459	-12	-15	78.6046	73.4459
1999-02-12 20:00:00	2	20	-5	-10	68.3161	-12	-14	85.2411	68.3161
1999-02-12 21:00:00	2	21	-4	-10	63.4111	-12	-14	85.2411	63.4111
1999-02-12 22:00:00	2	22	-5	-9	73.8338	-12	-14	85.2411	73.8338
1999-02-12 23:00:00	2	23	-6	-9	79.583	-12	-14	85.2411	79.583
1999-02-13	2	0	-6	-9	79.583	-12	-14	85.2411	79.583
1999-02-13 01:00:00	2	1	-7	-9	85.8282	-12	-13	92.3629	85.8282
1999-02-13 02:00:00	2	2	-6	-9	79.583	-13	-14	92.2968	79.583
1999-02-13 03:00:00	2	3	-6	-10	73.6413	-13	-16	78.4324	73.6413
1999-02-13 04:00:00	2	4	-6	-10	73.6413	-14	-16	84.9925	73.6413
1999-02-13 05:00:00	2	5	-5	-10	68.3161	-14	-16	84.9925	68.3161
1999-02-13 06:00:00	2	6	-6	-10	73.6413	-13	-15	85.1179	73.6413
1999-02-13 07:00:00	2	7	-5	-10	68.3161	-14	-16	84.9925	68.3161
1999-02-13 08:00:00	2	8	-6	-10	73.6413	-14	-16	84.9925	73.6413
1999-02-13 09:00:00	2	9	-5	-10	68.3161	-13	-14	92.2968	68.3161
1999-02-13 10:00:00	2	10	-3	-9	63.6563	-11	-12	92.4279	63.6563
1999-02-13 11:00:00	2	11	-1	-8	59.4146	-9	-11	85.5991	59.4146
1999-02-13 12:00:00	2	12	1	-7	55.5459	-8	-11	79.2669	55.5459
1999-02-13 13:00:00	2	13	3	-7	48.2021	-6	-10	73.6413	48.2021
1999-02-13 14:00:00	2	14	2	-6	55.8145	-6	-9	79.583	55.8145
1999-02-13 15:00:00	2	15	3	-6	52.0107	-4	-8	74.0235	52.0107
1999-02-13 16:00:00	2	16	3	-6	52.0107	-3	-8	68.7564	52.0107
1999-02-13 17:00:00	2	17	2	-6	55.8145	-4	-8	74.0235	55.8145
1999-02-13 18:00:00	2	18	1	-6	59.9261	-5	-8	79.7375	59.9261
1999-02-13 19:00:00	2	19	-2	-4	86.3705	-8	-10	85.7146	86.3705
1999-02-13 20:00:00	2	20	-2	-5	80.1873	-7	-9	85.8282	80.1873
1999-02-13 21:00:00	2	21				-7	-9	85.8282
1999-02-13 22:00:00	2	22	-1	-5	74.5767	-9	-11	85.5991	74.5767
1999-02-13 23:00:00	2	23	-2	-5	80.1873	-9	-11	85.5991	80.1873
1999-02-14	2	0	-2	-5	80.1873	-9	-11	85.5991	80.1873
1999-02-14 01:00:00	2	1	-3	-5	86.2654	-9	-11	85.5991	86.2654
1999-02-14 02:00:00	2	2	-4	-5	92.8539	-8	-10	85.7146	92.8539
1999-02-14 03:00:00	2	3	-1	-5	74.5767	-8	-9	92.6165	74.5767
1999-02-14 04:00:00	2	4	-1	-5	74.5767	-8	-9	92.6165	74.5767
1999-02-14 05:00:00	2	5	-1	-5	74.5767	-7	-8	92.6773	74.5767
1999-02-14 06:00:00	2	6	1	-5	64.6056	-7	-8	92.6773	64.6056
1999-02-14 07:00:00	2	7	-2	-4	86.3705	-6	-8	85.9401	86.3705
1999-02-14 08:00:00	2	8	2	-5	60.1772	-6	-7	92.7371	60.1772
1999-02-14 09:00:00	2	9	5	-5	48.7741	-4	-7	79.8897	48.7741
1999-02-14 10:00:00	2	10	5	-4	52.5606	-2	-5	80.1873	52.5606
1999-02-14 11:00:00	2	11	6	-2	56.8583	-2	-5	80.1873	56.8583
1999-02-14 12:00:00	2	12	4	-2	65.2863	2	-4	64.8354	65.2863
1999-02-14 13:00:00	2	13	5	-3	56.6018	1	-3	74.9327	56.6018
1999-02-14 14:00:00	2	14	7	-3	49.3344	3	-3	65.0622	49.3344
1999-02-14 15:00:00	2	15	7	-4	45.8057	7	-4	45.8057	45.8057
1999-02-14 16:00:00	2	16	6	-6	42.2066	7	-6	39.4048	42.2066
1999-02-14 17:00:00	2	17	5	-4	52.5606	7	-6	39.4048	52.5606
1999-02-14 18:00:00	2	18	4	-5	52.2871	5	-6	45.2285	52.2871
1999-02-14 19:00:00	2	19	4	-6	48.4896	3	-3	65.0622	48.4896
1999-02-14 20:00:00	2	20	3	-6	52.0107	1	-4	69.6017	52.0107
1999-02-14 21:00:00	2	21	3	-5	56.08	0	-2	86.576	56.08
1999-02-14 22:00:00	2	22	0	-3	80.4763	0	-3	80.4763	80.4763
1999-02-14 23:00:00	2	23	0	-3	80.4763	0	-3	80.4763	80.4763
1999-02-15	2	0	1	-5	64.6056	-2	-3	92.9669	64.6056
1999-02-15 01:00:00	2	1	0	-5	69.3947	-3	-5	86.2654	69.3947
1999-02-15 02:00:00	2	2	0	-5	69.3947	-4	-6	86.1586	69.3947
1999-02-15 03:00:00	2	3	0	-4	74.756	-3	-5	86.2654	74.756
1999-02-15 04:00:00	2	4	-1	-4	80.3328	-4	-6	86.1586	80.3328
1999-02-15 05:00:00	2	5	-1	-3	86.474	-5	-6	92.796	86.474
1999-02-15 06:00:00	2	6	-1	-3	86.474	-4	-6	86.1586	86.474
1999-02-15 07:00:00	2	7	-2	-6	74.3949	-4	-6	86.1586	74.3949
1999-02-15 08:00:00	2	8	-1	-6	69.1848	-7	-8	92.6773	69.1848
1999-02-15 09:00:00	2	9	-2	-6	74.3949	-4	-6	86.1586	74.3949
1999-02-15 10:00:00	2	10	1	-5	64.6056	-2	-4	86.3705	64.6056
1999-02-15 11:00:00	2	11	2	-5	60.1772	0	-4	74.756	60.1772
1999-02-15 12:00:00	2	12	4	-5	52.2871	1	-4	69.6017	52.2871
1999-02-15 13:00:00	2	13	4	-5	52.2871	1	-4	69.6017	52.2871
1999-02-15 14:00:00	2	14	5	-4	52.5606	3	-5	56.08	52.5606
1999-02-15 15:00:00	2	15	6	-6	42.2066	3	-6	52.0107	42.2066
1999-02-15 16:00:00	2	16	6	-5	45.5185	3	-6	52.0107	45.5185
1999-02-15 17:00:00	2	17	4	-6	48.4896	2	-4	64.8354	48.4896
1999-02-15 18:00:00	2	18	2	-6	55.8145	1	-3	74.9327	55.8145
1999-02-15 19:00:00	2	19	1	-6	59.9261	1	-3	74.9327	59.9261
1999-02-15 20:00:00	2	20	0	-6	64.3729	0	-4	74.756	64.3729
1999-02-15 21:00:00	2	21	1	-8	51.4485	-3	-5	86.2654	51.4485
1999-02-15 22:00:00	2	22	1	-8	51.4485	-4	-5	92.8539	51.4485
1999-02-15 23:00:00	2	23	0	-8	55.2742	-3	-6	80.0396	55.2742
1999-02-16	2	0	-1	-8	59.4146	-4	-7	79.8897	59.4146
1999-02-16 01:00:00	2	1	-1	-8	59.4146	-4	-6	86.1586	59.4146
1999-02-16 02:00:00	2	2	0	-7	59.6719	-4	-6	86.1586	59.6719
1999-02-16 03:00:00	2	3	-1	-7	64.1371	-4	-6	86.1586	64.1371
1999-02-16 04:00:00	2	4	0	-8	55.2742	-4	-6	86.1586	55.2742
1999-02-16 05:00:00	2	5	0	-8	55.2742	-3	-6	80.0396	55.2742
1999-02-16 06:00:00	2	6	0	-8	55.2742	-3	-6	80.0396	55.2742
1999-02-16 07:00:00	2	7	0	-8	55.2742	-3	-6	80.0396	55.2742
1999-02-16 08:00:00	2	8	0	-8	55.2742	-2	-6	74.3949	55.2742
1999-02-16 09:00:00	2	9	2	-8	47.9116	-2	-6	74.3949	47.9116
1999-02-16 10:00:00	2	10	1	-7	55.5459	-1	-6	69.1848	55.5459
1999-02-16 11:00:00	2	11	5	-6	45.2285	1	-6	59.9261	45.2285
1999-02-16 12:00:00	2	12	7	-6	39.4048	2	-3	69.8061	39.4048
1999-02-16 13:00:00	2	13	6	-7	39.1074	4	-4	56.3424	39.1074
1999-02-16 14:00:00	2	14	7	-5	42.4999	5	-5	48.7741	42.4999
1999-02-16 15:00:00	2	15	7	-4	45.8057	6	-4	49.0557	45.8057
1999-02-16 16:00:00	2	16	7	-4	45.8057	6	-3	52.8311	45.8057
1999-02-16 17:00:00	2	17	7	-7	36.5087	4	-3	60.6703	36.5087
1999-02-16 18:00:00	2	18	6	-7	39.1074	4	-3	60.6703	39.1074
1999-02-16 19:00:00	2	19	5	-6	45.2285	3	-3	65.0622	45.2285
1999-02-16 20:00:00	2	20	3	-7	48.2021	2	-3	69.8061	48.2021
1999-02-16 21:00:00	2	21	3	-7	48.2021	2	-3	69.8061	48.2021
1999-02-16 22:00:00	2	22	3	-7	48.2021	1	-2	80.6176	48.2021
1999-02-16 23:00:00	2	23	3	-6	52.0107	0	-3	80.4763	52.0107
1999-02-17	2	0	6	-5	45.5185	0	-2	86.576	45.5185
1999-02-17 01:00:00	2	1	5	-6	45.2285	0	-2	86.576	45.2285
1999-02-17 02:00:00	2	2	6	-5	45.5185	1	-2	80.6176	45.5185
1999-02-17 03:00:00	2	3	6	-5	45.5185	1	-2	80.6176	45.5185
1999-02-17 04:00:00	2	4	6	-4	49.0557	1	-1	86.6764	49.0557
1999-02-17 05:00:00	2	5	6	-1	61.1516	3	-1	75.279	61.1516
1999-02-17 06:00:00	2	6	6	0	65.7259	2	0	86.7753	65.7259
1999-02-17 07:00:00	2	7	3	0	80.8943				80.8943
1999-02-17 08:00:00	2	8	1	0	93.1299	2	0	86.7753	93.1299
1999-02-17 09:00:00	2	9	2	0	86.7753	3	0	80.8943	86.7753
1999-02-17 10:00:00	2	10	5	4	93.3358	4	0	75.4485	93.3358
1999-02-17 11:00:00	2	11				1	-1	86.6764
1999-02-17 12:00:00	2	12	5	4	93.3358	3	0	80.8943	93.3358
1999-02-17 13:00:00	2	13	3	1	86.8728	4	-2	65.2863	86.8728
1999-02-17 14:00:00	2	14	3	1	86.8728	4	-4	56.3424	86.8728
1999-02-17 15:00:00	2	15	6	-4	49.0557	5	-4	52.5606	49.0557
1999-02-17 16:00:00	2	16	6	-4	49.0557	5	-5	48.7741	49.0557
1999-02-17 17:00:00	2	17	6	0	65.7259	4	-4	56.3424	65.7259
1999-02-17 18:00:00	2	18	4	-2	65.2863	3	-3	65.0622	65.2863
1999-02-17 19:00:00	2	19	3	-2	70.0077	2	-3	69.8061	70.0077
1999-02-17 20:00:00	2	20	3	-4	60.4252	2	-3	69.8061	60.4252
1999-02-17 21:00:00	2	21	2	0	86.7753	1	-2	80.6176	86.7753
1999-02-17 22:00:00	2	22	3	2	93.2344	1	-1	86.6764	93.2344
1999-02-17 23:00:00	2	23	2	0	86.7753	2	-4	64.8354	86.7753
1999-02-18	2	0	2	0	86.7753	1	-4	69.6017	86.7753
1999-02-18 01:00:00	2	1	1	-1	86.6764	0	-6	64.3729	86.6764
1999-02-18 02:00:00	2	2	2	-4	64.8354	1	-7	55.5459	64.8354
1999-02-18 03:00:00	2	3	-1	-5	74.5767	-1	-6	69.1848	74.5767
1999-02-18 04:00:00	2	4				-2	-6	74.3949
1999-02-18 05:00:00	2	5				-2	-6	74.3949
1999-02-18 06:00:00	2	6	-2	-6	74.3949	-3	-6	80.0396	74.3949
1999-02-18 07:00:00	2	7	-2	-7	68.9721	-3	-7	74.2106	68.9721
1999-02-18 08:00:00	2	8	0	-7	59.6719	-4	-7	79.8897	59.6719
1999-02-18 09:00:00	2	9	0	-7	59.6719	-2	-6	74.3949	59.6719
1999-02-18 10:00:00	2	10	1	-6	59.9261	-1	-6	69.1848	59.9261
1999-02-18 11:00:00	2	11	2	-6	55.8145	0	-6	64.3729	55.8145
1999-02-18 12:00:00	2	12	6	-6	42.2066	1	-4	69.6017	42.2066
1999-02-18 13:00:00	2	13	7	-6	39.4048	2	-4	64.8354	39.4048
1999-02-18 14:00:00	2	14	8	-4	42.7906	2	-4	64.8354	42.7906
1999-02-18 15:00:00	2	15	7	-5	42.4999	2	-1	80.757	42.4999
1999-02-18 16:00:00	2	16	6	-2	56.8583	2	-1	80.757	56.8583
1999-02-18 17:00:00	2	17	2	0	86.7753	0	-1	93.0764	86.7753
1999-02-18 18:00:00	2	18	2	0	86.7753	0	-1	93.0764	86.7753
1999-02-18 19:00:00	2	19	3	0	80.8943	0	-1	93.0764	80.8943
1999-02-18 20:00:00	2	20	3	0	80.8943	0	-1	93.0764	80.8943
1999-02-18 21:00:00	2	21	3	0	80.8943	0	-1	93.0764	80.8943
1999-02-18 22:00:00	2	22	1	1	100	0	-1	93.0764	100
1999-02-18 23:00:00	2	23	1	1	100	0	0	100	100
1999-02-19	2	0	3	0	80.8943	0	-1	93.0764	80.8943
1999-02-19 01:00:00	2	1
1999-02-19 02:00:00	2	2	1	0	93.1299	1	0	93.1299	93.1299
1999-02-19 03:00:00	2	3	0	0	100	1	0	93.1299	100
1999-02-19 04:00:00	2	4	0	0	100	2	-1	80.757	100
1999-02-19 05:00:00	2	5	0	-2	86.576	2	-5	60.1772	86.576
1999-02-19 06:00:00	2	6	0	-3	80.4763	2	-6	55.8145	80.4763
1999-02-19 07:00:00	2	7	0	-3	80.4763	2	-6	55.8145	80.4763
1999-02-19 08:00:00	2	8	0	-4	74.756	1	-4	69.6017	74.756
1999-02-19 09:00:00	2	9	1	-4	69.6017	2	-5	60.1772	69.6017
1999-02-19 10:00:00	2	10	1	-3	74.9327	1	-3	74.9327	74.9327
1999-02-19 11:00:00	2	11	2	-4	64.8354	1	-3	74.9327	64.8354
1999-02-19 12:00:00	2	12	3	-5	56.08	1	-3	74.9327	56.08
1999-02-19 13:00:00	2	13	2	-6	55.8145	2	-4	64.8354	55.8145
1999-02-19 14:00:00	2	14	3	-7	48.2021	2	-3	69.8061	48.2021
1999-02-19 15:00:00	2	15	3	-7	48.2021	3	-3	65.0622	48.2021
1999-02-19 16:00:00	2	16	3	-7	48.2021	2	-4	64.8354	48.2021
1999-02-19 17:00:00	2	17	3	-4	60.4252	2	-4	64.8354	60.4252
1999-02-19 18:00:00	2	18	2	-4	64.8354	2	-4	64.8354	64.8354
1999-02-19 19:00:00	2	19	0	-4	74.756	2	-4	64.8354	74.756
1999-02-19 20:00:00	2	20	-1	-4	80.3328	2	-7	51.7312	80.3328
1999-02-19 21:00:00	2	21	-1	-5	74.5767	0	-3	80.4763	74.5767
1999-02-19 22:00:00	2	22	-1	-5	74.5767	-1	-5	74.5767	74.5767
1999-02-19 23:00:00	2	23	-2	-5	80.1873	-3	-6	80.0396	80.1873
1999-02-20	2	0	-2	-6	74.3949	-3	-6	80.0396	74.3949
1999-02-20 01:00:00	2	1	-3	-5	86.2654	-3	-7	74.2106	86.2654
1999-02-20 02:00:00	2	2	-4	-7	79.8897	-5	-7	86.0502	79.8897
1999-02-20 03:00:00	2	3	-4	-7	79.8897	-4	-7	79.8897	79.8897
1999-02-20 04:00:00	2	4	-4	-7	79.8897	-5	-8	79.7375	79.8897
1999-02-20 05:00:00	2	5	-4	-8	74.0235	-5	-8	79.7375	74.0235
1999-02-20 06:00:00	2	6	-5	-8	79.7375	-6	-8	85.9401	79.7375
1999-02-20 07:00:00	2	7	-5	-8	79.7375	-7	-8	92.6773	79.7375
1999-02-20 08:00:00	2	8	-6	-9	79.583	-7	-9	85.8282	79.583
1999-02-20 09:00:00	2	9	-4	-8	74.0235	-5	-8	79.7375	74.0235
1999-02-20 10:00:00	2	10	-2	-7	68.9721	-4	-7	79.8897	68.9721
1999-02-20 11:00:00	2	11	-1	-7	64.1371	-3	-7	74.2106	64.1371
1999-02-20 12:00:00	2	12	1	-7	55.5459	-2	-8	63.8983	55.5459
1999-02-20 13:00:00	2	13	2	-5	60.1772	0	-5	69.3947	60.1772
1999-02-20 14:00:00	2	14	3	-6	52.0107	1	-6	59.9261	52.0107
1999-02-20 15:00:00	2	15	4	-7	44.9356	1	-6	59.9261	44.9356
1999-02-20 16:00:00	2	16	4	-7	44.9356	2	-6	55.8145	44.9356
1999-02-20 17:00:00	2	17	4	-5	52.2871	2	-6	55.8145	52.2871
1999-02-20 18:00:00	2	18	2	-5	60.1772	0	-5	69.3947	60.1772
1999-02-20 19:00:00	2	19	1	-5	64.6056	-1	-6	69.1848	64.6056
1999-02-20 20:00:00	2	20	3	-9	41.3101	-2	-5	80.1873	41.3101
1999-02-20 21:00:00	2	21	4	-10	35.603	-2	-4	86.3705	35.603
1999-02-20 22:00:00	2	22	3	-10	38.1997				38.1997
1999-02-20 23:00:00	2	23	2	-10	41.0057	-2	-5	80.1873	41.0057
1999-02-21	2	0	2	-10	41.0057	-2	-4	86.3705	41.0057
1999-02-21 01:00:00	2	1	2	-10	41.0057	-2	-5	80.1873	41.0057
1999-02-21 02:00:00	2	2	2	-10	41.0057	-2	-6	74.3949	41.0057
1999-02-21 03:00:00	2	3	3	-10	38.1997	-2	-6	74.3949	38.1997
1999-02-21 04:00:00	2	4	4	-10	35.603	-2	-4	86.3705	35.603
1999-02-21 05:00:00	2	5	5	-8	38.8075	-2	-4	86.3705	38.8075
1999-02-21 06:00:00	2	6	4	-8	41.6117	-2	-5	80.1873	41.6117
1999-02-21 07:00:00	2	7	5	-8	38.8075	1	-6	59.9261	38.8075
1999-02-21 08:00:00	2	8	5	-8	38.8075	-1	-4	80.3328	38.8075
1999-02-21 09:00:00	2	9	6	-5	45.5185	1	-4	69.6017	45.5185
1999-02-21 10:00:00	2	10	7	-6	39.4048	1	-3	74.9327	39.4048
1999-02-21 11:00:00	2	11	5	-5	48.7741	2	-4	64.8354	48.7741
1999-02-21 12:00:00	2	12	4	-4	56.3424	3	-3	65.0622	56.3424
1999-02-21 13:00:00	2	13	4	-6	48.4896	4	-4	56.3424	48.4896
1999-02-21 14:00:00	2	14	3	-5	56.08	2	-1	80.757	56.08
1999-02-21 15:00:00	2	15	3	-5	56.08	1	-1	86.6764	56.08
1999-02-21 16:00:00	2	16	3	-5	56.08	1	-1	86.6764	56.08
1999-02-21 17:00:00	2	17	2	-6	55.8145	-1	-2	93.0221	55.8145
1999-02-21 18:00:00	2	18	1	-6	59.9261	0	-4	74.756	59.9261
1999-02-21 19:00:00	2	19	-2	-3	92.9669	-1	-5	74.5767	92.9669
1999-02-21 20:00:00	2	20	-2	-3	92.9669	0	-6	64.3729	92.9669
1999-02-21 21:00:00	2	21	-3	-3	100	-1	-7	64.1371	100
1999-02-21 22:00:00	2	22	-3	-4	92.9108	0	-9	51.1627	92.9108
1999-02-21 23:00:00	2	23	-2	-4	86.3705	-1	-8	59.4146	86.3705
1999-02-22	2	0	-1	-6	69.1848	-1	-8	59.4146	69.1848
1999-02-22 01:00:00	2	1	-2	-6	74.3949	0	-8	55.2742	74.3949
1999-02-22 02:00:00	2	2	-2	-7	68.9721	-1	-8	59.4146	68.9721
1999-02-22 03:00:00	2	3	-2	-7	68.9721	-2	-6	74.3949	68.9721
1999-02-22 04:00:00	2	4
1999-02-22 05:00:00	2	5	-3	-7	74.2106	-2	-7	68.9721	74.2106
1999-02-22 06:00:00	2	6	-4	-7	79.8897	-2	-7	68.9721	79.8897
1999-02-22 07:00:00	2	7	-4	-7	79.8897	-2	-6	74.3949	79.8897
1999-02-22 08:00:00	2	8	-4	-7	79.8897	-2	-6	74.3949	79.8897
1999-02-22 09:00:00	2	9	-2	-7	68.9721	-2	-5	80.1873	68.9721
1999-02-22 10:00:00	2	10	0	-7	59.6719	0	-7	59.6719	59.6719
1999-02-22 11:00:00	2	11	0	-7	59.6719	1	-8	51.4485	59.6719
1999-02-22 12:00:00	2	12	2	-8	47.9116	1	-8	51.4485	47.9116
1999-02-22 13:00:00	2	13	1	-8	51.4485	2	-9	44.3411	51.4485
1999-02-22 14:00:00	2	14	3	-8	44.6398	2	-8	47.9116	44.6398
1999-02-22 15:00:00	2	15	3	-8	44.6398	2	-8	47.9116	44.6398
1999-02-22 16:00:00	2	16	3	-9	41.3101	2	-8	47.9116	41.3101
1999-02-22 17:00:00	2	17	3	-9	41.3101	3	-7	48.2021	41.3101
1999-02-22 18:00:00	2	18				2	-6	55.8145
1999-02-22 19:00:00	2	19	2	-8	47.9116	2	-6	55.8145	47.9116
1999-02-22 20:00:00	2	20	2	-6	55.8145	1	-4	69.6017	55.8145
1999-02-22 21:00:00	2	21	1	-7	55.5459	1	-4	69.6017	55.5459
1999-02-22 22:00:00	2	22	1	-6	59.9261	1	-4	69.6017	59.9261
1999-02-22 23:00:00	2	23	2	-6	55.8145	2	-4	64.8354	55.8145
1999-02-23	2	0	2	-6	55.8145	1	-4	69.6017	55.8145
1999-02-23 01:00:00	2	1	2	-7	51.7312	1	-4	69.6017	51.7312
1999-02-23 02:00:00	2	2	2	-6	55.8145	1	-4	69.6017	55.8145
1999-02-23 03:00:00	2	3	2	-7	51.7312	1	-3	74.9327	51.7312
1999-02-23 04:00:00	2	4	2	-7	51.7312	1	-3	74.9327	51.7312
1999-02-23 05:00:00	2	5	2	-7	51.7312	0	-2	86.576	51.7312
1999-02-23 06:00:00	2	6	2	-7	51.7312	1	-3	74.9327	51.7312
1999-02-23 07:00:00	2	7	2	-6	55.8145	2	-4	64.8354	55.8145
1999-02-23 08:00:00	2	8	2	-6	55.8145	1	-2	80.6176	55.8145
1999-02-23 09:00:00	2	9	3	-6	52.0107	2	-3	69.8061	52.0107
1999-02-23 10:00:00	2	10				3	-3	65.0622
1999-02-23 11:00:00	2	11	5	-5	48.7741	5	-5	48.7741	48.7741
1999-02-23 12:00:00	2	12	6	-4	49.0557	6	-4	49.0557	49.0557
1999-02-23 13:00:00	2	13				7	-3	49.3344
1999-02-23 14:00:00	2	14				7	-3	49.3344
1999-02-23 15:00:00	2	15	8	-5	39.6996	8	-3	46.0901	39.6996
1999-02-23 16:00:00	2	16	9	-4	39.9919	8	-3	46.0901	39.9919
1999-02-23 17:00:00	2	17	8	-4	42.7906	8	-2	49.6102	42.7906
1999-02-23 18:00:00	2	18	8	-4	42.7906	7	-2	53.0986	42.7906
1999-02-23 19:00:00	2	19	7	-4	45.8057	6	-1	61.1516	45.8057
1999-02-23 20:00:00	2	20	6	-4	49.0557	5	-1	65.5075	49.0557
1999-02-23 21:00:00	2	21	7	-5	42.4999	4	-1	70.2067	42.4999
1999-02-23 22:00:00	2	22	7	-5	42.4999	4	-1	70.2067	42.4999
1999-02-23 23:00:00	2	23	6	-4	49.0557				49.0557
1999-02-24	2	0	5	-5	48.7741	2	-1	80.757	48.7741
1999-02-24 01:00:00	2	1	5	-5	48.7741	2	-1	80.757	48.7741
1999-02-24 02:00:00	2	2	4	-4	56.3424	2	-2	75.107	56.3424
1999-02-24 03:00:00	2	3	5	-5	48.7741	1	-2	80.6176	48.7741
1999-02-24 04:00:00	2	4	5	-5	48.7741	-1	-2	93.0221	48.7741
1999-02-24 05:00:00	2	5	1	-5	64.6056	-1	-3	86.474	64.6056
1999-02-24 06:00:00	2	6	0	-5	69.3947	1	-2	80.6176	69.3947
1999-02-24 07:00:00	2	7	3	-4	60.4252	2	-2	75.107	60.4252
1999-02-24 08:00:00	2	8	1	-4	69.6017	1	-1	86.6764	69.6017
1999-02-24 09:00:00	2	9	5	-4	52.5606	3	-1	75.279	52.5606
1999-02-24 10:00:00	2	10	7	-4	45.8057	6	-2	56.8583	45.8057
1999-02-24 11:00:00	2	11	10	-4	37.3927	8	-1	53.3633	37.3927
1999-02-24 12:00:00	2	12	11	-4	34.9778	9	-1	49.8832	34.9778
1999-02-24 13:00:00	2	13	12	-3	35.2666	11	0	46.927	35.2666
1999-02-24 14:00:00	2	14	14	-4	28.7021	11	1	50.421	28.7021
1999-02-24 15:00:00	2	15	14	-4	28.7021	12	-1	40.8537	28.7021
1999-02-24 16:00:00	2	16	14	-4	28.7021	13	-1	38.2556	28.7021
1999-02-24 17:00:00	2	17	14	-5	26.6175	13	-2	35.5532	26.6175
1999-02-24 18:00:00	2	18	13	-4	30.6449	11	3	58.0979	30.6449
1999-02-24 19:00:00	2	19	9	-5	37.1004	9	-2	46.3718	37.1004
1999-02-24 20:00:00	2	20	8	-5	39.6996	7	-3	49.3344	39.6996
1999-02-24 21:00:00	2	21	7	-5	42.4999	5	-1	65.5075	42.4999
1999-02-24 22:00:00	2	22	7	-5	42.4999	2	-1	80.757	42.4999
1999-02-24 23:00:00	2	23	5	-5	48.7741	1	-2	80.6176	48.7741
1999-02-25	2	0	6	-6	42.2066	0	-2	86.576	42.2066
1999-02-25 01:00:00	2	1	6	-5	45.5185	-1	-3	86.474	45.5185
1999-02-25 02:00:00	2	2	7	-4	45.8057	-1	-3	86.474	45.8057
1999-02-25 03:00:00	2	3	7	-5	42.4999	-1	-3	86.474	42.4999
1999-02-25 04:00:00	2	4	5	-5	48.7741	-2	-3	92.9669	48.7741
1999-02-25 05:00:00	2	5	8	-6	36.8058	-2	-3	92.9669	36.8058
1999-02-25 06:00:00	2	6	7	-5	42.4999	-2	-4	86.3705	42.4999
1999-02-25 07:00:00	2	7	8	-7	34.0982	-3	-4	92.9108	34.0982
1999-02-25 08:00:00	2	8	9	-7	31.8612	-2	-4	86.3705	31.8612
1999-02-25 09:00:00	2	9	9	-6	34.3936	1	-2	80.6176	34.3936
1999-02-25 10:00:00	2	10	11	-6	30.0728	6	-1	61.1516	30.0728
1999-02-25 11:00:00	2	11	12	-6	28.1387	8	-1	53.3633	28.1387
1999-02-25 12:00:00	2	12	12	-6	28.1387	12	-2	37.9703	28.1387
1999-02-25 13:00:00	2	13	12	-7	26.061	13	-2	35.5532	26.061
1999-02-25 14:00:00	2	14	13	-7	24.3934	12	-2	37.9703	24.3934
1999-02-25 15:00:00	2	15	12	-7	26.061	11	-3	37.6827	26.061
1999-02-25 16:00:00	2	16	13	-8	22.5739	12	-3	35.2666	22.5739
1999-02-25 17:00:00	2	17	5	-2	60.9124	6	-1	61.1516	60.9124
1999-02-25 18:00:00	2	18	3	-3	65.0622	3	-1	75.279	65.0622
1999-02-25 19:00:00	2	19	3	-4	60.4252	1	0	93.1299	60.4252
1999-02-25 20:00:00	2	20	1	-2	80.6176	1	0	93.1299	80.6176
1999-02-25 21:00:00	2	21	2	-4	64.8354	1	-1	86.6764	64.8354
1999-02-25 22:00:00	2	22	1	-4	69.6017	1	-1	86.6764	69.6017
1999-02-25 23:00:00	2	23	1	-7	55.5459	-1	-3	86.474	55.5459
1999-02-26	2	0	-1	-5	74.5767	-2	-4	86.3705	74.5767
1999-02-26 01:00:00	2	1	0	-4	74.756	-2	-4	86.3705	74.756
1999-02-26 02:00:00	2	2	-1	-5	74.5767	-2	-4	86.3705	74.5767
1999-02-26 03:00:00	2	3	-1	-5	74.5767	-1	-4	80.3328	74.5767
1999-02-26 04:00:00	2	4	-1	-6	69.1848	-2	-4	86.3705	69.1848
1999-02-26 05:00:00	2	5	-1	-6	69.1848	-1	-4	80.3328	69.1848
1999-02-26 06:00:00	2	6	-1	-5	74.5767	-1	-5	74.5767	74.5767
1999-02-26 07:00:00	2	7				-2	-4	86.3705
1999-02-26 08:00:00	2	8	-4	-6	86.1586	-1	-4	80.3328	86.1586
1999-02-26 09:00:00	2	9	0	-4	74.756	0	-4	74.756	74.756
1999-02-26 10:00:00	2	10	0	-5	69.3947	2	-7	51.7312	69.3947
1999-02-26 11:00:00	2	11	3	-6	52.0107	2	-5	60.1772	52.0107
1999-02-26 12:00:00	2	12	2	-6	55.8145	2	-6	55.8145	55.8145
1999-02-26 13:00:00	2	13				2	-5	60.1772
1999-02-26 14:00:00	2	14	3	-9	41.3101	2	-4	64.8354	41.3101
1999-02-26 15:00:00	2	15				2	-4	64.8354
1999-02-26 16:00:00	2	16	4	-10	35.603	2	-4	64.8354	35.603
1999-02-26 17:00:00	2	17	2	-10	41.0057	2	-4	64.8354	41.0057
1999-02-26 18:00:00	2	18	2	-10	41.0057	1	-3	74.9327	41.0057
1999-02-26 19:00:00	2	19	1	-9	47.618	0	-2	86.576	47.618
1999-02-26 20:00:00	2	20				-1	-2	93.0221
1999-02-26 21:00:00	2	21	0	-9	51.1627	0	-3	80.4763	51.1627
1999-02-26 22:00:00	2	22	-2	-9	59.1541	-1	-3	86.474	59.1541
1999-02-26 23:00:00	2	23	-2	-8	63.8983	-2	-4	86.3705	63.8983
1999-02-27	2	0	-2	-8	63.8983	-3	-6	80.0396	63.8983
1999-02-27 01:00:00	2	1	-3	-8	68.7564	-3	-7	74.2106	68.7564
1999-02-27 02:00:00	2	2	-3	-8	68.7564	-4	-6	86.1586	68.7564
1999-02-27 03:00:00	2	3	-3	-9	63.6563	-4	-6	86.1586	63.6563
1999-02-27 04:00:00	2	4	-3	-9	63.6563	-4	-6	86.1586	63.6563
1999-02-27 05:00:00	2	5	-3	-9	63.6563	-5	-7	86.0502	63.6563
1999-02-27 06:00:00	2	6	-3	-9	63.6563	-4	-7	79.8897	63.6563
1999-02-27 07:00:00	2	7	-3	-9	63.6563	-4	-7	79.8897	63.6563
1999-02-27 08:00:00	2	8	-3	-9	63.6563	-3	-7	74.2106	63.6563
1999-02-27 09:00:00	2	9	0	-9	51.1627	-3	-6	80.0396	51.1627
1999-02-27 10:00:00	2	10	2	-8	47.9116	-1	-6	69.1848	47.9116
1999-02-27 11:00:00	2	11	3	-8	44.6398	1	-5	64.6056	44.6398
1999-02-27 12:00:00	2	12	5	-8	38.8075	2	-4	64.8354	38.8075
1999-02-27 13:00:00	2	13	7	-8	33.8006	4	-4	56.3424	33.8006
1999-02-27 14:00:00	2	14	7	-8	33.8006	7	-3	49.3344	33.8006
1999-02-27 15:00:00	2	15	8	-8	31.5666	7	-3	49.3344	31.5666
1999-02-27 16:00:00	2	16	8	-7	34.0982	8	-4	42.7906	34.0982
1999-02-27 17:00:00	2	17	8	-6	36.8058	8	-6	36.8058	36.8058
1999-02-27 18:00:00	2	18	8	-6	36.8058	8	-4	42.7906	36.8058
1999-02-27 19:00:00	2	19	7	-5	42.4999	5	-2	60.9124	42.4999
1999-02-27 20:00:00	2	20	6	-5	45.5185	3	-2	70.0077	45.5185
1999-02-27 21:00:00	2	21	4	-5	52.2871	4	-2	65.2863	52.2871
1999-02-27 22:00:00	2	22	5	-5	48.7741	3	-2	70.0077	48.7741
1999-02-27 23:00:00	2	23	4	-5	52.2871	1	-2	80.6176	52.2871
1999-02-28	2	0	3	-4	60.4252	1	-2	80.6176	60.4252
1999-02-28 01:00:00	2	1	3	-4	60.4252	0	-2	86.576	60.4252
1999-02-28 02:00:00	2	2	4	-4	56.3424	-1	-2	93.0221	56.3424
1999-02-28 03:00:00	2	3	3	-4	60.4252	0	-2	86.576	60.4252
1999-02-28 04:00:00	2	4	2	-4	64.8354	1	-2	80.6176	64.8354
1999-02-28 05:00:00	2	5	2	-4	64.8354	0	-1	93.0764	64.8354
1999-02-28 06:00:00	2	6	2	-4	64.8354	0	-1	93.0764	64.8354
1999-02-28 07:00:00	2	7	2	-4	64.8354	0	-1	93.0764	64.8354
1999-02-28 08:00:00	2	8	3	-4	60.4252	1	-1	86.6764	60.4252
1999-02-28 09:00:00	2	9	8	-3	46.0901	2	0	86.7753	46.0901
1999-02-28 10:00:00	2	10	10	-4	37.3927	4	-1	70.2067	37.3927
1999-02-28 11:00:00	2	11	10	-3	40.2816	8	0	57.3625	40.2816
1999-02-28 12:00:00	2	12	12	-3	35.2666	11	-1	43.6467	35.2666
1999-02-28 13:00:00	2	13	13	-3	33.0193	13	-1	38.2556	33.0193
1999-02-28 14:00:00	2	14	14	-3	30.9281	14	-1	35.8377	30.9281
1999-02-28 15:00:00	2	15	15	-3	28.9813	14	-1	35.8377	28.9813
1999-02-28 16:00:00	2	16	15	-4	26.8935	15	-1	33.5864	26.8935
1999-02-28 17:00:00	2	17	14	-5	26.6175	14	-3	30.9281	26.6175
1999-02-28 18:00:00	2	18	13	-3	33.0193	12	0	43.927	33.0193
1999-02-28 19:00:00	2	19	12	-4	32.7328	9	0	53.6251	32.7328
1999-02-28 20:00:00	2	20	11	-7	27.8545	9	0	53.6251	27.8545
1999-02-28 21:00:00	2	21	10	-5	34.6868	8	0	57.3625	34.6868
1999-02-28 22:00:00	2	22	9	-6	34.3936	6	0	65.7259	34.3936
1999-02-28 23:00:00	2	23	8	-4	42.7906	5	-3	56.6018	42.7906
1999-03-01	3	0	7	-5	42.4999	4	-2	65.2863	42.4999
1999-03-01 01:00:00	3	1	6	-4	49.0557	1	-3	74.9327	49.0557
1999-03-01 02:00:00	3	2	6	-5	45.5185	2	-1	80.757	45.5185
1999-03-01 03:00:00	3	3	7	-4	45.8057	3	-1	75.279	45.8057
1999-03-01 04:00:00	3	4	6	-4	49.0557	3	0	80.8943	49.0557
1999-03-01 05:00:00	3	5	4	-3	60.6703				60.6703
1999-03-01 06:00:00	3	6	5	-3	56.6018	6	1	70.5969	56.6018
1999-03-01 07:00:00	3	7	7	2	70.7883	6	2	75.7809	70.7883
1999-03-01 08:00:00	3	8				4	2	86.9689
1999-03-01 09:00:00	3	9	6	4	87.1569	6	4	87.1569	87.1569
1999-03-01 10:00:00	3	10	9	4	71.1637	4	3	93.2855	71.1637
1999-03-01 11:00:00	3	11	9	2	61.8524	4	2	86.9689	61.8524
1999-03-01 12:00:00	3	12	9	1	57.6104	6	2	75.7809	57.6104
1999-03-01 13:00:00	3	13				6	3	81.2949
1999-03-01 14:00:00	3	14	8	3	70.9772	6	3	81.2949	70.9772
1999-03-01 15:00:00	3	15	9	2	61.8524	7	2	70.7883	61.8524
1999-03-01 16:00:00	3	16	9	0	53.6251	7	2	70.7883	53.6251
1999-03-01 17:00:00	3	17	9	-1	49.8832	8	2	66.1548	49.8832
1999-03-01 18:00:00	3	18	9	-1	49.8832	7	0	61.388	49.8832
1999-03-01 19:00:00	3	19	6	-1	61.1516	4	-1	70.2067	61.1516
1999-03-01 20:00:00	3	20	4	-2	65.2863	4	-2	65.2863	65.2863
1999-03-01 21:00:00	3	21	3	-3	65.0622	3	-4	60.4252	65.0622
1999-03-01 22:00:00	3	22	3	-3	65.0622	3	-4	60.4252	65.0622
1999-03-01 23:00:00	3	23	2	-5	60.1772	3	-6	52.0107	60.1772
1999-03-02	3	0	3	-7	48.2021	1	-4	69.6017	48.2021
1999-03-02 01:00:00	3	1	2	-9	44.3411	0	-4	74.756	44.3411
1999-03-02 02:00:00	3	2	1	-8	51.4485	-1	-4	80.3328	51.4485
1999-03-02 03:00:00	3	3	0	-7	59.6719	-1	-6	69.1848	59.6719
1999-03-02 04:00:00	3	4	-1	-7	64.1371	-2	-6	74.3949	64.1371
1999-03-02 05:00:00	3	5	-2	-7	68.9721	-1	-5	74.5767	68.9721
1999-03-02 06:00:00	3	6	-2	-7	68.9721	-2	-6	74.3949	68.9721
1999-03-02 07:00:00	3	7	-2	-7	68.9721	-2	-7	68.9721	68.9721
1999-03-02 08:00:00	3	8	-1	-7	64.1371	-3	-6	80.0396	64.1371
1999-03-02 09:00:00	3	9	1	-8	51.4485	-1	-6	69.1848	51.4485
1999-03-02 10:00:00	3	10	2	-8	47.9116	1	-4	69.6017	47.9116
1999-03-02 11:00:00	3	11	4	-8	41.6117	2	-4	64.8354	41.6117
1999-03-02 12:00:00	3	12	6	-7	39.1074	3	-6	52.0107	39.1074
1999-03-02 13:00:00	3	13	6	-8	36.2093	6	-5	45.5185	36.2093
1999-03-02 14:00:00	3	14	7	-8	33.8006	7	-4	45.8057	33.8006
1999-03-02 15:00:00	3	15	8	-6	36.8058	7	-5	42.4999	36.8058
1999-03-02 16:00:00	3	16	8	-6	36.8058	7	-4	45.8057	36.8058
1999-03-02 17:00:00	3	17	9	-6	34.3936	8	-4	42.7906	34.3936
1999-03-02 18:00:00	3	18	7	-5	42.4999	7	-3	49.3344	42.4999
1999-03-02 19:00:00	3	19	7	-5	42.4999	6	-1	61.1516	42.4999
1999-03-02 20:00:00	3	20	6	-5	45.5185	5	-1	65.5075	45.5185
1999-03-02 21:00:00	3	21	6	-5	45.5185	4	-1	70.2067	45.5185
1999-03-02 22:00:00	3	22	5	-5	48.7741	1	0	93.1299	48.7741
1999-03-02 23:00:00	3	23	3	-5	56.08	1	-1	86.6764	56.08
1999-03-03	3	0	6	-6	42.2066	-1	-2	93.0221	42.2066
1999-03-03 01:00:00	3	1	5	-6	45.2285	-1	-2	93.0221	45.2285
1999-03-03 02:00:00	3	2	3	-5	56.08	-2	-3	92.9669	56.08
1999-03-03 03:00:00	3	3	3	-5	56.08	-2	-4	86.3705	56.08
1999-03-03 04:00:00	3	4	2	-5	60.1772	-2	-3	92.9669	60.1772
1999-03-03 05:00:00	3	5	1	-5	64.6056	-3	-5	86.2654	64.6056
1999-03-03 06:00:00	3	6	1	-5	64.6056	-2	-4	86.3705	64.6056
1999-03-03 07:00:00	3	7	5	-5	48.7741	-2	-3	92.9669	48.7741
1999-03-03 08:00:00	3	8	9	-6	34.3936	-1	-3	86.474	34.3936
1999-03-03 09:00:00	3	9	10	-6	32.1537	0	-2	86.576	32.1537
1999-03-03 10:00:00	3	10	9	-5	37.1004	1	-1	86.6764	37.1004
1999-03-03 11:00:00	3	11	10	-5	34.6868	2	-1	80.757	34.6868
1999-03-03 12:00:00	3	12	11	-5	32.4443	7	1	65.9417	32.4443
1999-03-03 13:00:00	3	13	12	-5	30.3598	9	-1	49.8832	30.3598
1999-03-03 14:00:00	3	14	10	-4	37.3927	12	-2	37.9703	37.3927
1999-03-03 15:00:00	3	15	10	-3	40.2816	10	1	53.8842	40.2816
1999-03-03 16:00:00	3	16	10	-5	34.6868	7	-1	57.1118	34.6868
1999-03-03 17:00:00	3	17	7	-2	53.0986	5	0	70.4031	53.0986
1999-03-03 18:00:00	3	18	6	-2	56.8583	4	-1	70.2067	56.8583
1999-03-03 19:00:00	3	19	4	-2	65.2863	3	-1	75.279	65.2863
1999-03-03 20:00:00	3	20	3	-1	75.279	3	-1	75.279	75.279
1999-03-03 21:00:00	3	21	3	-2	70.0077	2	-3	69.8061	70.0077
1999-03-03 22:00:00	3	22	3	-3	65.0622	2	-4	64.8354	65.0622
1999-03-03 23:00:00	3	23	3	-4	60.4252	1	-4	69.6017	60.4252
1999-03-04	3	0	2	-4	64.8354	1	-3	74.9327	64.8354
1999-03-04 01:00:00	3	1	3	-2	70.0077	1	-3	74.9327	70.0077
1999-03-04 02:00:00	3	2	1	-1	86.6764	1	-4	69.6017	86.6764
1999-03-04 03:00:00	3	3	0	0	100	1	-3	74.9327	100
1999-03-04 04:00:00	3	4	0	0	100	1	-3	74.9327	100
1999-03-04 05:00:00	3	5	0	0	100	-1	-2	93.0221	100
1999-03-04 06:00:00	3	6	0	-1	93.0764	-1	-2	93.0221	93.0764
1999-03-04 07:00:00	3	7	0	-1	93.0764	-1	-3	86.474	93.0764
1999-03-04 08:00:00	3	8	0	-1	93.0764	-2	-3	92.9669	93.0764
1999-03-04 09:00:00	3	9	0	-1	93.0764	1	-3	74.9327	93.0764
1999-03-04 10:00:00	3	10	1	0	93.1299	2	-3	69.8061	93.1299
1999-03-04 11:00:00	3	11	1	0	93.1299	4	-2	65.2863	93.1299
1999-03-04 12:00:00	3	12	2	-1	80.757	4	-3	60.6703	80.757
1999-03-04 13:00:00	3	13	3	-3	65.0622	5	-2	60.9124	65.0622
1999-03-04 14:00:00	3	14	3	-5	56.08	3	-1	75.279	56.08
1999-03-04 15:00:00	3	15	3	-4	60.4252	2	-2	75.107	60.4252
1999-03-04 16:00:00	3	16	3	-5	56.08	1	-4	69.6017	56.08
1999-03-04 17:00:00	3	17	1	-4	69.6017	0	-6	64.3729	69.6017
1999-03-04 18:00:00	3	18	-1	-6	69.1848	0	-6	64.3729	69.1848
1999-03-04 19:00:00	3	19	-2	-6	74.3949	0	-6	64.3729	74.3949
1999-03-04 20:00:00	3	20	-2	-7	68.9721	-2	-6	74.3949	68.9721
1999-03-04 21:00:00	3	21	-2	-8	63.8983	-2	-7	68.9721	63.8983
1999-03-04 22:00:00	3	22	-3	-8	68.7564	-2	-8	63.8983	68.7564
1999-03-04 23:00:00	3	23	-3	-9	63.6563	-3	-8	68.7564	63.6563
1999-03-05	3	0	-4	-10	63.4111	-3	-8	68.7564	63.4111
1999-03-05 01:00:00	3	1	-4	-10	63.4111	-4	-7	79.8897	63.4111
1999-03-05 02:00:00	3	2	-5	-10	68.3161	-4	-9	68.5378	68.3161
1999-03-05 03:00:00	3	3	-6	-10	73.6413	-5	-9	73.8338	73.6413
1999-03-05 04:00:00	3	4	-7	-10	79.4262	-4	-9	68.5378	79.4262
1999-03-05 05:00:00	3	5	-8	-10	85.7146	-5	-9	73.8338	85.7146
1999-03-05 06:00:00	3	6	-8	-11	79.2669	-6	-10	73.6413	79.2669
1999-03-05 07:00:00	3	7	-8	-11	79.2669	-7	-11	73.4459	79.2669
1999-03-05 08:00:00	3	8	-7	-11	73.4459	-6	-12	62.9109	73.4459
1999-03-05 09:00:00	3	9	-5	-10	68.3161	-4	-10	63.4111	68.3161
1999-03-05 10:00:00	3	10	-2	-10	54.721	-2	-9	59.1541	54.721
1999-03-05 11:00:00	3	11	-1	-10	50.8737	-1	-9	54.9993	50.8737
1999-03-05 12:00:00	3	12	0	-11	43.7348	1	-10	44.0395	43.7348
1999-03-05 13:00:00	3	13	0	-13	37.2681	1	-11	40.6984	37.2681
1999-03-05 14:00:00	3	14	1	-13	34.6752	2	-12	34.987	34.6752
1999-03-05 15:00:00	3	15	2	-14	29.7559	2	-12	34.987	29.7559
1999-03-05 16:00:00	3	16	1	-13	34.6752	2	-12	34.987	34.6752
1999-03-05 17:00:00	3	17	2	-13	32.2788	2	-12	34.987	32.2788
1999-03-05 18:00:00	3	18	1	-12	37.5813	2	-11	37.8919	37.5813
1999-03-05 19:00:00	3	19	0	-13	37.2681	0	-8	55.2742	37.2681
1999-03-05 20:00:00	3	20	-1	-12	43.427	0	-9	51.1627	43.427
1999-03-05 21:00:00	3	21	-1	-12	43.427	-1	-10	50.8737	43.427
1999-03-05 22:00:00	3	22	-1	-12	43.427	-3	-8	68.7564	43.427
1999-03-05 23:00:00	3	23	-2	-12	46.7185	-3	-9	63.6563	46.7185
1999-03-06	3	0	-2	-12	46.7185	-3	-9	63.6563	46.7185
1999-03-06 01:00:00	3	1	-2	-12	46.7185	-4	-8	74.0235	46.7185
1999-03-06 02:00:00	3	2	-3	-12	50.2859	-4	-8	74.0235	50.2859
1999-03-06 03:00:00	3	3	-3	-13	46.4123	-4	-9	68.5378	46.4123
1999-03-06 04:00:00	3	4	-3	-13	46.4123	-6	-8	85.9401	46.4123
1999-03-06 05:00:00	3	5	-3	-14	42.8023	-6	-8	85.9401	42.8023
1999-03-06 06:00:00	3	6	-3	-13	46.4123	-6	-8	85.9401	46.4123
1999-03-06 07:00:00	3	7	-4	-13	49.987	-7	-8	92.6773	49.987
1999-03-06 08:00:00	3	8	-3	-12	50.2859	-5	-8	79.7375	50.2859
1999-03-06 09:00:00	3	9	-1	-12	43.427	-3	-8	68.7564	43.427
1999-03-06 10:00:00	3	10	0	-11	43.7348	-2	-9	59.1541	43.7348
1999-03-06 11:00:00	3	11	2	-10	41.0057	-1	-9	54.9993	41.0057
1999-03-06 12:00:00	3	12	3	-9	41.3101	2	-9	44.3411	41.3101
1999-03-06 13:00:00	3	13	5	-8	38.8075	3	-9	41.3101	38.8075
1999-03-06 14:00:00	3	14	6	-8	36.2093	4	-8	41.6117	36.2093
1999-03-06 15:00:00	3	15	7	-7	36.5087	6	-6	42.2066	36.5087
1999-03-06 16:00:00	3	16	8	-6	36.8058	7	-6	39.4048	36.8058
1999-03-06 17:00:00	3	17				7	-5	42.4999
1999-03-06 18:00:00	3	18	6	-7	39.1074	6	-3	52.8311	39.1074
1999-03-06 19:00:00	3	19	6	-6	42.2066	4	-3	60.6703	42.2066
1999-03-06 20:00:00	3	20	6	-7	39.1074	4	-6	48.4896	39.1074
1999-03-06 21:00:00	3	21	5	-7	41.9105	4	-5	52.2871	41.9105
1999-03-06 22:00:00	3	22	5	-7	41.9105	2	-4	64.8354	41.9105
1999-03-06 23:00:00	3	23	5	-7	41.9105	2	-5	60.1772	41.9105
1999-03-07	3	0	4	-7	44.9356	1	-4	69.6017	44.9356
1999-03-07 01:00:00	3	1	4	-7	44.9356	1	-4	69.6017	44.9356
1999-03-07 02:00:00	3	2	5	-7	41.9105	-1	-4	80.3328	41.9105
1999-03-07 03:00:00	3	3	5	-7	41.9105	0	-3	80.4763	41.9105
1999-03-07 04:00:00	3	4	4	-7	44.9356	1	-4	69.6017	44.9356
1999-03-07 05:00:00	3	5	3	-6	52.0107	0	-3	80.4763	52.0107
1999-03-07 06:00:00	3	6	3	-5	56.08	1	-3	74.9327	56.08
1999-03-07 07:00:00	3	7	3	-5	56.08	1	-3	74.9327	56.08
1999-03-07 08:00:00	3	8	5	-5	48.7741	1	-3	74.9327	48.7741
1999-03-07 09:00:00	3	9	3	-4	60.4252	3	-3	65.0622	60.4252
1999-03-07 10:00:00	3	10	4	-4	56.3424	4	-3	60.6703	56.3424
1999-03-07 11:00:00	3	11	4	-4	56.3424	4	0	75.4485	56.3424
1999-03-07 12:00:00	3	12	3	-3	65.0622	6	-2	56.8583	65.0622
1999-03-07 13:00:00	3	13	4	-3	60.6703	6	-2	56.8583	60.6703
1999-03-07 14:00:00	3	14	5	-3	56.6018	6	-1	61.1516	56.6018
1999-03-07 15:00:00	3	15	5	-4	52.5606	6	0	65.7259	52.5606
1999-03-07 16:00:00	3	16	5	-3	56.6018	6	-1	61.1516	56.6018
1999-03-07 17:00:00	3	17	5	-2	60.9124	5	-3	56.6018	60.9124
1999-03-07 18:00:00	3	18	4	-3	60.6703	3	-4	60.4252	60.6703
1999-03-07 19:00:00	3	19	2	-5	60.1772	3	-4	60.4252	60.1772
1999-03-07 20:00:00	3	20				3	-5	56.08
1999-03-07 21:00:00	3	21	0	-4	74.756	0	-4	74.756	74.756
1999-03-07 22:00:00	3	22	0	-4	74.756	-2	-6	74.3949	74.756
1999-03-07 23:00:00	3	23	-1	-5	74.5767	-2	-6	74.3949	74.5767
1999-03-08	3	0	-2	-5	80.1873	-3	-6	80.0396	80.1873
1999-03-08 01:00:00	3	1	-2	-5	80.1873	-3	-5	86.2654	80.1873
1999-03-08 02:00:00	3	2	-2	-5	80.1873	-3	-6	80.0396	80.1873
1999-03-08 03:00:00	3	3	-3	-6	80.0396	-4	-7	79.8897	80.0396
1999-03-08 04:00:00	3	4	-3	-6	80.0396	-5	-7	86.0502	80.0396
1999-03-08 05:00:00	3	5	-3	-5	86.2654	-4	-7	79.8897	86.2654
1999-03-08 06:00:00	3	6	-3	-6	80.0396	-4	-8	74.0235	80.0396
1999-03-08 07:00:00	3	7	-4	-7	79.8897	-4	-8	74.0235	79.8897
1999-03-08 08:00:00	3	8	-2	-5	80.1873	-3	-8	68.7564	80.1873
1999-03-08 09:00:00	3	9	1	-4	69.6017	-2	-6	74.3949	69.6017
1999-03-08 10:00:00	3	10	3	-6	52.0107	1	-7	55.5459	52.0107
1999-03-08 11:00:00	3	11	3	-7	48.2021	3	-7	48.2021	48.2021
1999-03-08 12:00:00	3	12	4	-8	41.6117	4	-6	48.4896	41.6117
1999-03-08 13:00:00	3	13	5	-8	38.8075	5	-6	45.2285	38.8075
1999-03-08 14:00:00	3	14	5	-7	41.9105	5	-6	45.2285	41.9105
1999-03-08 15:00:00	3	15	6	-7	39.1074	6	-7	39.1074	39.1074
1999-03-08 16:00:00	3	16	6	-7	39.1074	5	-8	38.8075	39.1074
1999-03-08 17:00:00	3	17				6	-6	42.2066
1999-03-08 18:00:00	3	18	6	-6	42.2066	5	-6	45.2285	42.2066
1999-03-08 19:00:00	3	19	4	-5	52.2871	4	-5	52.2871	52.2871
1999-03-08 20:00:00	3	20	4	-5	52.2871	4	-5	52.2871	52.2871
1999-03-08 21:00:00	3	21	4	-6	48.4896	1	-3	74.9327	48.4896
1999-03-08 22:00:00	3	22	5	-5	48.7741	1	-2	80.6176	48.7741
1999-03-08 23:00:00	3	23	6	-6	42.2066	1	-3	74.9327	42.2066
1999-03-09	3	0	6	-4	49.0557	3	-2	70.0077	49.0557
1999-03-09 01:00:00	3	1				2	-1	80.757
1999-03-09 02:00:00	3	2	2	1	93.1826	1	-2	80.6176	93.1826
1999-03-09 03:00:00	3	3	2	1	93.1826	1	0	93.1299	93.1826
1999-03-09 04:00:00	3	4	3	1	86.8728	1	0	93.1299	86.8728
1999-03-09 05:00:00	3	5	3	0	80.8943	1	0	93.1299	80.8943
1999-03-09 06:00:00	3	6	4	-1	70.2067	1	0	93.1299	70.2067
1999-03-09 07:00:00	3	7	5	-2	60.9124	1	0	93.1299	60.9124
1999-03-09 08:00:00	3	8	5	-3	56.6018	3	0	80.8943	56.6018
1999-03-09 09:00:00	3	9	6	-3	52.8311	3	0	80.8943	52.8311
1999-03-09 10:00:00	3	10	7	-3	49.3344	5	0	70.4031	49.3344
1999-03-09 11:00:00	3	11	8	-3	46.0901	6	0	65.7259	46.0901
1999-03-09 12:00:00	3	12	7	-4	45.8057	5	0	70.4031	45.8057
1999-03-09 13:00:00	3	13	7	-4	45.8057	4	0	75.4485	45.8057
1999-03-09 14:00:00	3	14	7	-4	45.8057	3	0	80.8943	45.8057
1999-03-09 15:00:00	3	15	2	0	86.7753				86.7753
1999-03-09 16:00:00	3	16	0	0	100	1	0	93.1299	100
1999-03-09 17:00:00	3	17	0	0	100	1	-1	86.6764	100
1999-03-09 18:00:00	3	18	0	0	100	1	-1	86.6764	100
1999-03-09 19:00:00	3	19	0	-1	93.0764	0	0	100	93.0764
1999-03-09 20:00:00	3	20	1	0	93.1299	1	-1	86.6764	93.1299
1999-03-09 21:00:00	3	21	0	0	100	0	-1	93.0764	100
1999-03-09 22:00:00	3	22	-1	-1	100	0	-1	93.0764	100
1999-03-09 23:00:00	3	23	-2	-2	100	1	-1	86.6764	100
1999-03-10	3	0	-2	-2	100	-1	-2	93.0221	100
1999-03-10 01:00:00	3	1	-2	-2	100	-1	-2	93.0221	100
1999-03-10 02:00:00	3	2	-2	-2	100	-1	-3	86.474	100
1999-03-10 03:00:00	3	3	-4	-4	100	-2	-4	86.3705	100
1999-03-10 04:00:00	3	4	-5	-5	100	-2	-3	92.9669	100
1999-03-10 05:00:00	3	5	-5	-5	100	-7	-8	92.6773	100
1999-03-10 06:00:00	3	6	-5	-5	100	-3	-4	92.9108	100
1999-03-10 07:00:00	3	7	-5	-6	92.796	-4	-6	86.1586	92.796
1999-03-10 08:00:00	3	8	-4	-6	86.1586	-3	-4	92.9108	86.1586
1999-03-10 09:00:00	3	9	-3	-6	80.0396	-2	-4	86.3705	80.0396
1999-03-10 10:00:00	3	10	-1	-5	74.5767	-2	-6	74.3949	74.5767
1999-03-10 11:00:00	3	11	0	-5	69.3947	1	-4	69.6017	69.3947
1999-03-10 12:00:00	3	12	1	-4	69.6017	1	-3	74.9327	69.6017
1999-03-10 13:00:00	3	13	2	-6	55.8145	1	-3	74.9327	55.8145
1999-03-10 14:00:00	3	14	2	-5	60.1772	3	-3	65.0622	60.1772
1999-03-10 15:00:00	3	15	3	-5	56.08				56.08
1999-03-10 16:00:00	3	16	4	-5	52.2871	3	-4	60.4252	52.2871
1999-03-10 17:00:00	3	17	4	-6	48.4896	4	-4	56.3424	48.4896
1999-03-10 18:00:00	3	18	3	-3	65.0622	3	-6	52.0107	65.0622
1999-03-10 19:00:00	3	19	2	-4	64.8354	2	-3	69.8061	64.8354
1999-03-10 20:00:00	3	20	2	-4	64.8354	1	-2	80.6176	64.8354
1999-03-10 21:00:00	3	21	1	-4	69.6017	1	-2	80.6176	69.6017
1999-03-10 22:00:00	3	22	2	-5	60.1772	1	-2	80.6176	60.1772
1999-03-10 23:00:00	3	23	3	-6	52.0107	-1	-2	93.0221	52.0107
1999-03-11	3	0	2	-6	55.8145	-2	-3	92.9669	55.8145
1999-03-11 01:00:00	3	1	0	-4	74.756	-1	-4	80.3328	74.756
1999-03-11 02:00:00	3	2	1	-5	64.6056	-1	-4	80.3328	64.6056
1999-03-11 03:00:00	3	3	2	-6	55.8145	-1	-3	86.474	55.8145
1999-03-11 04:00:00	3	4	2	-6	55.8145	-1	-3	86.474	55.8145
1999-03-11 05:00:00	3	5	1	-3	74.9327	-1	-3	86.474	74.9327
1999-03-11 06:00:00	3	6	2	-6	55.8145	-1	-3	86.474	55.8145
1999-03-11 07:00:00	3	7	2	-6	55.8145	-1	-2	93.0221	55.8145
1999-03-11 08:00:00	3	8	2	-4	64.8354	-1	-3	86.474	64.8354
1999-03-11 09:00:00	3	9	2	-5	60.1772	0	-3	80.4763	60.1772
1999-03-11 10:00:00	3	10	1	-2	80.6176	-1	-2	93.0221	80.6176
1999-03-11 11:00:00	3	11				-1	-1	100
1999-03-11 12:00:00	3	12	1	-1	86.6764	0	-1	93.0764	86.6764
1999-03-11 13:00:00	3	13	2	2	100	1	-1	86.6764	100
1999-03-11 14:00:00	3	14	2	2	100	2	0	86.7753	100
1999-03-11 15:00:00	3	15	2	1	93.1826	2	0	86.7753	93.1826
1999-03-11 16:00:00	3	16	1	1	100	2	0	86.7753	100
1999-03-11 17:00:00	3	17	1	1	100	2	0	86.7753	100
1999-03-11 18:00:00	3	18	1	0	93.1299	2	0	86.7753	93.1299
1999-03-11 19:00:00	3	19	0	0	100	1	-1	86.6764	100
1999-03-11 20:00:00	3	20	0	0	100	1	-1	86.6764	100
1999-03-11 21:00:00	3	21	-1	-1	100	1	-1	86.6764	100
1999-03-11 22:00:00	3	22	0	0	100	0	-2	86.576	100
1999-03-11 23:00:00	3	23	-1	-1	100	-1	-2	93.0221	100
1999-03-12	3	0	-1	-1	100	-1	-2	93.0221	100
1999-03-12 01:00:00	3	1	-1	-2	93.0221	-1	-2	93.0221	93.0221
1999-03-12 02:00:00	3	2	-1	-3	86.474	-2	-3	92.9669	86.474
1999-03-12 03:00:00	3	3	-1	-3	86.474	-2	-4	86.3705	86.474
1999-03-12 04:00:00	3	4	-2	-3	92.9669	-1	-3	86.474	92.9669
1999-03-12 05:00:00	3	5	-2	-4	86.3705	-1	-3	86.474	86.3705
1999-03-12 06:00:00	3	6	-2	-4	86.3705	-1	-4	80.3328	86.3705
1999-03-12 07:00:00	3	7	-2	-4	86.3705	-3	-4	92.9108	86.3705
1999-03-12 08:00:00	3	8	-1	-4	80.3328	-2	-3	92.9669	80.3328
1999-03-12 09:00:00	3	9	0	-3	80.4763	0	-4	74.756	80.4763
1999-03-12 10:00:00	3	10	1	-3	74.9327	1	-3	74.9327	74.9327
1999-03-12 11:00:00	3	11	3	-3	65.0622	2	-3	69.8061	65.0622
1999-03-12 12:00:00	3	12	4	-4	56.3424	3	-4	60.4252	56.3424
1999-03-12 13:00:00	3	13	5	-3	56.6018	4	-3	60.6703	56.6018
1999-03-12 14:00:00	3	14	6	-3	52.8311	6	-3	52.8311	52.8311
1999-03-12 15:00:00	3	15	6	-4	49.0557	7	-2	53.0986	49.0557
1999-03-12 16:00:00	3	16	6	-4	49.0557	7	-4	45.8057	49.0557
1999-03-12 17:00:00	3	17	6	-5	45.5185	7	-5	42.4999	45.5185
1999-03-12 18:00:00	3	18	5	-3	56.6018	7	-4	45.8057	56.6018
1999-03-12 19:00:00	3	19				3	-3	65.0622
1999-03-12 20:00:00	3	20				2	-3	69.8061
1999-03-12 21:00:00	3	21	1	-3	74.9327	1	-4	69.6017	74.9327
1999-03-12 22:00:00	3	22	-1	-4	80.3328	0	-3	80.4763	80.3328
1999-03-12 23:00:00	3	23	0	-4	74.756	-1	-4	80.3328	74.756
1999-03-13	3	0	0	-4	74.756	-2	-4	86.3705	74.756
1999-03-13 01:00:00	3	1	-1	-5	74.5767	-3	-4	92.9108	74.5767
1999-03-13 02:00:00	3	2	-1	-5	74.5767	-3	-6	80.0396	74.5767
1999-03-13 03:00:00	3	3	-1	-5	74.5767	-3	-6	80.0396	74.5767
1999-03-13 04:00:00	3	4	-1	-5	74.5767	-3	-6	80.0396	74.5767
1999-03-13 05:00:00	3	5	-2	-6	74.3949	-3	-4	92.9108	74.3949
1999-03-13 06:00:00	3	6	-2	-6	74.3949	-4	-6	86.1586	74.3949
1999-03-13 07:00:00	3	7	-3	-6	80.0396	-4	-6	86.1586	80.0396
1999-03-13 08:00:00	3	8	-1	-5	74.5767	-2	-4	86.3705	74.5767
1999-03-13 09:00:00	3	9	0	-5	69.3947	-2	-3	92.9669	69.3947
1999-03-13 10:00:00	3	10	2	-5	60.1772	0	-3	80.4763	60.1772
1999-03-13 11:00:00	3	11	5	-4	52.5606	2	-3	69.8061	52.5606
1999-03-13 12:00:00	3	12	6	-4	49.0557	4	-3	60.6703	49.0557
1999-03-13 13:00:00	3	13	7	-5	42.4999	6	-3	52.8311	42.4999
1999-03-13 14:00:00	3	14	8	-4	42.7906	8	-2	49.6102	42.7906
1999-03-13 15:00:00	3	15	10	-3	40.2816	9	-4	39.9919	40.2816
1999-03-13 16:00:00	3	16	9	-4	39.9919	9	-4	39.9919	39.9919
1999-03-13 17:00:00	3	17	9	-3	43.0786	9	-2	46.3718	43.0786
1999-03-13 18:00:00	3	18	8	-1	53.3633	9	-3	43.0786	53.3633
1999-03-13 19:00:00	3	19	6	-1	61.1516	6	-1	61.1516	61.1516
1999-03-13 20:00:00	3	20	5	-1	65.5075	3	-1	75.279	65.5075
1999-03-13 21:00:00	3	21	5	-3	56.6018	3	-1	75.279	56.6018
1999-03-13 22:00:00	3	22	5	-4	52.5606	2	-1	80.757	52.5606
1999-03-13 23:00:00	3	23	4	-4	56.3424	1	-1	86.6764	56.3424
1999-03-14	3	0	3	-4	60.4252	1	-2	80.6176	60.4252
1999-03-14 01:00:00	3	1	4	-4	56.3424	0	-2	86.576	56.3424
1999-03-14 02:00:00	3	2	3	-4	60.4252	-1	-2	93.0221	60.4252
1999-03-14 03:00:00	3	3	3	-5	56.08	-2	-3	92.9669	56.08
1999-03-14 04:00:00	3	4	3	-5	56.08	-1	-3	86.474	56.08
1999-03-14 05:00:00	3	5	3	-5	56.08	-2	-4	86.3705	56.08
1999-03-14 06:00:00	3	6	3	-5	56.08	-3	-4	92.9108	56.08
1999-03-14 07:00:00	3	7	2	-6	55.8145	-3	-4	92.9108	55.8145
1999-03-14 08:00:00	3	8	4	-6	48.4896	-1	-3	86.474	48.4896
1999-03-14 09:00:00	3	9	6	-5	45.5185	2	-1	80.757	45.5185
1999-03-14 10:00:00	3	10	8	-5	39.6996	4	0	75.4485	39.6996
1999-03-14 11:00:00	3	11	12	-5	30.3598	6	-1	61.1516	30.3598
1999-03-14 12:00:00	3	12	14	-3	30.9281	9	-1	49.8832	30.9281
1999-03-14 13:00:00	3	13	15	-4	26.8935	11	1	50.421	26.8935
1999-03-14 14:00:00	3	14	17	-4	23.6395	13	1	44.2046	23.6395
1999-03-14 15:00:00	3	15	17	-5	21.9179	16	-2	29.2589	21.9179
1999-03-14 16:00:00	3	16	16	-5	23.3748	17	-2	27.441	23.3748
1999-03-14 17:00:00	3	17	16	-5	23.3748	16	-1	31.4892	23.3748
1999-03-14 18:00:00	3	18	12	-1	40.8537	16	-1	31.4892	40.8537
1999-03-14 19:00:00	3	19	12	-3	35.2666	11	-1	43.6467	35.2666
1999-03-14 20:00:00	3	20	11	-5	32.4443	10	-2	43.364	32.4443
1999-03-14 21:00:00	3	21	8	-5	39.6996	6	-2	56.8583	39.6996
1999-03-14 22:00:00	3	22	7	-5	42.4999	3	-1	75.279	42.4999
1999-03-14 23:00:00	3	23	10	-5	34.6868	4	-1	70.2067	34.6868
1999-03-15	3	0	11	-5	32.4443	3	-2	70.0077	32.4443
1999-03-15 01:00:00	3	1	8	-4	42.7906	3	-1	75.279	42.7906
1999-03-15 02:00:00	3	2	10	-5	34.6868	2	-1	80.757	34.6868
1999-03-15 03:00:00	3	3	6	-5	45.5185	1	-2	80.6176	45.5185
1999-03-15 04:00:00	3	4	7	-6	39.4048	0	-2	86.576	39.4048
1999-03-15 05:00:00	3	5	5	-5	48.7741	-1	-3	86.474	48.7741
1999-03-15 06:00:00	3	6	8	-5	39.6996	-2	-4	86.3705	39.6996
1999-03-15 07:00:00	3	7	5	-5	48.7741	-2	-4	86.3705	48.7741
1999-03-15 08:00:00	3	8	5	-5	48.7741	1	-1	86.6764	48.7741
1999-03-15 09:00:00	3	9	8	-5	39.6996	3	1	86.8728	39.6996
1999-03-15 10:00:00	3	10	11	-4	34.9778	7	-2	53.0986	34.9778
1999-03-15 11:00:00	3	11	13	-5	28.4212	11	0	46.927	28.4212
1999-03-15 12:00:00	3	12	14	-5	26.6175	14	1	41.4161	26.6175
1999-03-15 13:00:00	3	13	16	-7	20.0534				20.0534
1999-03-15 14:00:00	3	14	17	-7	18.8008	17	-4	23.6395	18.8008
1999-03-15 15:00:00	3	15	18	-9	15.0779	17	-4	23.6395	15.0779
1999-03-15 16:00:00	3	16	18	-9	15.0779	17	-4	23.6395	15.0779
1999-03-15 17:00:00	3	17	17	-7	18.8008	16	-3	27.168	18.8008
1999-03-15 18:00:00	3	18	13	-3	33.0193	14	-1	35.8377	33.0193
1999-03-15 19:00:00	3	19				8	1	61.6216
1999-03-15 20:00:00	3	20	11	-6	30.0728	7	0	61.388	30.0728
1999-03-15 21:00:00	3	21	11	-7	27.8545	8	-2	49.6102	27.8545
1999-03-15 22:00:00	3	22	10	-7	29.784	4	0	75.4485	29.784
1999-03-15 23:00:00	3	23				2	-2	75.107
1999-03-16	3	0	6	-2	56.8583	3	-1	75.279	56.8583
1999-03-16 01:00:00	3	1	5	-3	56.6018	1	-3	74.9327	56.6018
1999-03-16 02:00:00	3	2	8	-4	42.7906	0	-3	80.4763	42.7906
1999-03-16 03:00:00	3	3	7	-4	45.8057	2	-4	64.8354	45.8057
1999-03-16 04:00:00	3	4	9	-6	34.3936	-1	-3	86.474	34.3936
1999-03-16 05:00:00	3	5	8	-7	34.0982	1	-3	74.9327	34.0982
1999-03-16 06:00:00	3	6	8	-7	34.0982	1	-3	74.9327	34.0982
1999-03-16 07:00:00	3	7	6	-7	39.1074	8	-5	39.6996	39.1074
1999-03-16 08:00:00	3	8	7	-5	42.4999	10	-6	32.1537	42.4999
1999-03-16 09:00:00	3	9	11	-7	27.8545	12	-6	28.1387	27.8545
1999-03-16 10:00:00	3	10	12	-7	26.061	13	-5	28.4212	26.061
1999-03-16 11:00:00	3	11	13	-7	24.3934	13	-3	33.0193	24.3934
1999-03-16 12:00:00	3	12	14	-7	22.842	13	-4	30.6449	22.842
1999-03-16 13:00:00	3	13	14	-5	26.6175	14	-4	28.7021	26.6175
1999-03-16 14:00:00	3	14				14	-2	33.3038
1999-03-16 15:00:00	3	15	14	-6	24.6666	14	-1	35.8377	24.6666
1999-03-16 16:00:00	3	16	14	-6	24.6666	13	-3	33.0193	24.6666
1999-03-16 17:00:00	3	17	13	-3	33.0193	12	-4	32.7328	33.0193
1999-03-16 18:00:00	3	18	11	-4	34.9778	10	-4	37.3927	34.9778
1999-03-16 19:00:00	3	19	9	-5	37.1004	6	-5	45.5185	37.1004
1999-03-16 20:00:00	3	20	7	-6	39.4048	5	-6	45.2285	39.4048
1999-03-16 21:00:00	3	21	6	-7	39.1074	2	-5	60.1772	39.1074
1999-03-16 22:00:00	3	22	5	-8	38.8075	0	-4	74.756	38.8075
1999-03-16 23:00:00	3	23	3	-6	52.0107	1	-6	59.9261	52.0107
1999-03-17	3	0	2	-6	55.8145	-1	-6	69.1848	55.8145
1999-03-17 01:00:00	3	1	2	-5	60.1772	-1	-6	69.1848	60.1772
1999-03-17 02:00:00	3	2	0	-5	69.3947	-1	-6	69.1848	69.3947
1999-03-17 03:00:00	3	3	1	-4	69.6017	-1	-7	64.1371	69.6017
1999-03-17 04:00:00	3	4	-1	-6	69.1848	-2	-7	68.9721	69.1848
1999-03-17 05:00:00	3	5	1	-7	55.5459	-2	-6	74.3949	55.5459
1999-03-17 06:00:00	3	6	0	-7	59.6719	-5	-6	92.796	59.6719
1999-03-17 07:00:00	3	7	0	-7	59.6719	-4	-7	79.8897	59.6719
1999-03-17 08:00:00	3	8	2	-7	51.7312	-2	-5	80.1873	51.7312
1999-03-17 09:00:00	3	9	4	-5	52.2871	0	-6	64.3729	52.2871
1999-03-17 10:00:00	3	10	5	-4	52.5606	2	-6	55.8145	52.5606
1999-03-17 11:00:00	3	11	7	-5	42.4999	4	-6	48.4896	42.4999
1999-03-17 12:00:00	3	12	8	-5	39.6996	7	-6	39.4048	39.6996
1999-03-17 13:00:00	3	13	9	-4	39.9919	9	-6	34.3936	39.9919
1999-03-17 14:00:00	3	14	10	-4	37.3927	10	-6	32.1537	37.3927
1999-03-17 15:00:00	3	15	11	-5	32.4443	12	-7	26.061	32.4443
1999-03-17 16:00:00	3	16	11	-5	32.4443	12	-8	24.1189	32.4443
1999-03-17 17:00:00	3	17	11	-6	30.0728	13	-11	17.8075	30.0728
1999-03-17 18:00:00	3	18	9	-5	37.1004	12	-8	24.1189	37.1004
1999-03-17 19:00:00	3	19	6	-4	49.0557	9	-8	29.4934	49.0557
1999-03-17 20:00:00	3	20	5	-5	48.7741	6	-4	49.0557	48.7741
1999-03-17 21:00:00	3	21	5	-5	48.7741	4	-3	60.6703	48.7741
1999-03-17 22:00:00	3	22	5	-6	45.2285	2	-3	69.8061	45.2285
1999-03-17 23:00:00	3	23	4	-5	52.2871				52.2871
1999-03-18	3	0	4	-5	52.2871	0	-3	80.4763	52.2871
1999-03-18 01:00:00	3	1	3	-5	56.08	0	-4	74.756	56.08
1999-03-18 02:00:00	3	2	4	-4	56.3424	-1	-4	80.3328	56.3424
1999-03-18 03:00:00	3	3	4	-5	52.2871	-2	-4	86.3705	52.2871
1999-03-18 04:00:00	3	4	4	-5	52.2871	-2	-4	86.3705	52.2871
1999-03-18 05:00:00	3	5	3	-6	52.0107	-3	-6	80.0396	52.0107
1999-03-18 06:00:00	3	6	4	-6	48.4896	-3	-6	80.0396	48.4896
1999-03-18 07:00:00	3	7	3	-6	52.0107	-3	-5	86.2654	52.0107
1999-03-18 08:00:00	3	8	4	-6	48.4896	-1	-3	86.474	48.4896
1999-03-18 09:00:00	3	9	5	-6	45.2285	3	-3	65.0622	45.2285
1999-03-18 10:00:00	3	10	9	-5	37.1004	6	-4	49.0557	37.1004
1999-03-18 11:00:00	3	11	11	-4	34.9778	8	-4	42.7906	34.9778
1999-03-18 12:00:00	3	12	13	-3	33.0193	11	-4	34.9778	33.0193
1999-03-18 13:00:00	3	13	14	-4	28.7021	14	-4	28.7021	28.7021
1999-03-18 14:00:00	3	14	16	-3	27.168	15	-3	28.9813	27.168
1999-03-18 15:00:00	3	15	16	-3	27.168	17	-3	25.4783	27.168
1999-03-18 16:00:00	3	16	16	-3	27.168	17	-4	23.6395	27.168
1999-03-18 17:00:00	3	17	15	-3	28.9813	17	-4	23.6395	28.9813
1999-03-18 18:00:00	3	18				16	-3	27.168
1999-03-18 19:00:00	3	19	11	-3	37.6827	11	1	50.421	37.6827
1999-03-18 20:00:00	3	20	11	-3	37.6827	8	0	57.3625	37.6827
1999-03-18 21:00:00	3	21	11	-3	37.6827	6	0	65.7259	37.6827
1999-03-18 22:00:00	3	22	7	-3	49.3344	4	-1	70.2067	49.3344
1999-03-18 23:00:00	3	23	8	-4	42.7906	3	-2	70.0077	42.7906
1999-03-19	3	0	9	-4	39.9919	1	-2	80.6176	39.9919
1999-03-19 01:00:00	3	1	8	-4	42.7906	2	-3	69.8061	42.7906
1999-03-19 02:00:00	3	2	7	-4	45.8057	-1	-3	86.474	45.8057
1999-03-19 03:00:00	3	3	7	-4	45.8057	0	-3	80.4763	45.8057
1999-03-19 04:00:00	3	4	6	-4	49.0557	-1	-3	86.474	49.0557
1999-03-19 05:00:00	3	5	6	-4	49.0557	-2	-4	86.3705	49.0557
1999-03-19 06:00:00	3	6	5	-4	52.5606	-2	-4	86.3705	52.5606
1999-03-19 07:00:00	3	7	6	-4	49.0557	-1	-4	80.3328	49.0557
1999-03-19 08:00:00	3	8	7	-4	45.8057	1	-2	80.6176	45.8057
1999-03-19 09:00:00	3	9	9	-4	39.9919	4	-1	70.2067	39.9919
1999-03-19 10:00:00	3	10	10	-3	40.2816	8	-2	49.6102	40.2816
1999-03-19 11:00:00	3	11	13	-3	33.0193	11	-1	43.6467	33.0193
1999-03-19 12:00:00	3	12	15	-3	28.9813	13	-2	35.5532	28.9813
1999-03-19 13:00:00	3	13	17	-3	25.4783	16	-3	27.168	25.4783
1999-03-19 14:00:00	3	14	17	-3	25.4783	17	-3	25.4783	25.4783
1999-03-19 15:00:00	3	15	17	-2	27.441	18	-3	23.9031	27.441
1999-03-19 16:00:00	3	16	18	-1	27.7126	18	-3	23.9031	27.7126
1999-03-19 17:00:00	3	17	18	-1	27.7126	19	-3	22.434	27.7126
1999-03-19 18:00:00	3	18	15	-1	33.5864	18	-1	27.7126	33.5864
1999-03-19 19:00:00	3	19	12	-2	37.9703	14	0	38.5387	37.9703
1999-03-19 20:00:00	3	20	13	-3	33.0193	10	-1	46.6507	33.0193
1999-03-19 21:00:00	3	21	14	-4	28.7021	7	0	61.388	28.7021
1999-03-19 22:00:00	3	22	9	-3	43.0786	5	-1	65.5075	43.0786
1999-03-19 23:00:00	3	23	11	-4	34.9778	4	-1	70.2067	34.9778
1999-03-20	3	0	10	-4	37.3927	3	-2	70.0077	37.3927
1999-03-20 01:00:00	3	1	10	-4	37.3927	3	-2	70.0077	37.3927
1999-03-20 02:00:00	3	2	10	-4	37.3927	1	-2	80.6176	37.3927
1999-03-20 03:00:00	3	3	9	-4	39.9919	-1	-4	80.3328	39.9919
1999-03-20 04:00:00	3	4	8	-5	39.6996	2	-4	64.8354	39.6996
1999-03-20 05:00:00	3	5	9	-5	37.1004	-1	-3	86.474	37.1004
1999-03-20 06:00:00	3	6	8	-5	39.6996	-2	-4	86.3705	39.6996
1999-03-20 07:00:00	3	7	8	-5	39.6996	-2	-4	86.3705	39.6996
1999-03-20 08:00:00	3	8	9	-5	37.1004	2	-1	80.757	37.1004
1999-03-20 09:00:00	3	9	11	-5	32.4443	4	-1	70.2067	32.4443
1999-03-20 10:00:00	3	10				8	-1	53.3633
1999-03-20 11:00:00	3	11	15	-4	26.8935	13	-2	35.5532	26.8935
1999-03-20 12:00:00	3	12	16	-3	27.168	16	-2	29.2589	27.168
1999-03-20 13:00:00	3	13	17	-3	25.4783	18	-2	25.7462	25.4783
1999-03-20 14:00:00	3	14	18	-4	22.1764	18	-2	25.7462	22.1764
1999-03-20 15:00:00	3	15	19	-4	20.812	19	-3	22.434	20.812
1999-03-20 16:00:00	3	16	19	-3	22.434	18	-2	25.7462	22.434
1999-03-20 17:00:00	3	17	19	-4	20.812	18	-3	23.9031	20.812
1999-03-20 18:00:00	3	18	17	-4	23.6395	18	-4	22.1764	23.6395
1999-03-20 19:00:00	3	19	17	-6	20.3071	16	-3	27.168	20.3071
1999-03-20 20:00:00	3	20	16	-6	21.6585	16	-3	27.168	21.6585
1999-03-20 21:00:00	3	21	15	-6	23.109	14	-3	30.9281	23.109
1999-03-20 22:00:00	3	22	15	-5	24.9385	13	-3	33.0193	24.9385
1999-03-20 23:00:00	3	23	14	-5	26.6175	14	-4	28.7021	26.6175
1999-03-21	3	0	14	-4	28.7021	14	-4	28.7021	28.7021
1999-03-21 01:00:00	3	1	12	1	47.2006	13	-4	30.6449	47.2006
1999-03-21 02:00:00	3	2	12	2	50.6857	13	-4	30.6449	50.6857
1999-03-21 03:00:00	3	3	11	2	54.1405	10	1	53.8842	54.1405
1999-03-21 04:00:00	3	4	9	0	53.6251	8	3	70.9772	53.6251
1999-03-21 05:00:00	3	5	7	3	75.9437	8	4	76.1044	75.9437
1999-03-21 06:00:00	3	6	6	0	65.7259	6	3	81.2949	65.7259
1999-03-21 07:00:00	3	7	7	0	61.388	6	4	87.1569	61.388
1999-03-21 08:00:00	3	8	6	-2	56.8583	6	3	81.2949	56.8583
1999-03-21 09:00:00	3	9	6	-2	56.8583	7	3	75.9437	56.8583
1999-03-21 10:00:00	3	10	8	-3	46.0901	9	1	57.6104	46.0901
1999-03-21 11:00:00	3	11	9	-3	43.0786	10	1	53.8842	43.0786
1999-03-21 12:00:00	3	12	10	-4	37.3927	11	1	50.421	37.3927
1999-03-21 13:00:00	3	13	11	-4	34.9778	11	-1	43.6467	34.9778
1999-03-21 14:00:00	3	14	12	-4	32.7328	10	-1	46.6507	32.7328
1999-03-21 15:00:00	3	15	12	-4	32.7328	11	-2	40.5689	32.7328
1999-03-21 16:00:00	3	16	11	-5	32.4443	11	-2	40.5689	32.4443
1999-03-21 17:00:00	3	17	11	-4	34.9778	12	-2	37.9703	34.9778
1999-03-21 18:00:00	3	18	11	-4	34.9778	11	-1	43.6467	34.9778
1999-03-21 19:00:00	3	19	9	-3	43.0786	8	1	61.6216	43.0786
1999-03-21 20:00:00	3	20	8	-2	49.6102	5	1	75.6158	49.6102
1999-03-21 21:00:00	3	21	8	-2	49.6102	6	3	81.2949	49.6102
1999-03-21 22:00:00	3	22	6	-2	56.8583	5	3	87.0636	56.8583
1999-03-21 23:00:00	3	23	4	2	86.9689	5	2	81.1633	86.9689
1999-03-22	3	0	4	2	86.9689	6	2	75.7809	86.9689
1999-03-22 01:00:00	3	1	4	3	93.2855	6	2	75.7809	93.2855
1999-03-22 02:00:00	3	2	5	3	87.0636	6	3	81.2949	87.0636
1999-03-22 03:00:00	3	3	4	3	93.2855	4	2	86.9689	93.2855
1999-03-22 04:00:00	3	4	4	3	93.2855	4	3	93.2855	93.2855
1999-03-22 05:00:00	3	5	3	1	86.8728	4	3	93.2855	86.8728
1999-03-22 06:00:00	3	6	3	2	93.2344	2	1	93.1826	93.2344
1999-03-22 07:00:00	3	7	3	2	93.2344	4	3	93.2855	93.2344
1999-03-22 08:00:00	3	8	5	4	93.3358	5	3	87.0636	93.3358
1999-03-22 09:00:00	3	9	7	2	70.7883	6	3	81.2949	70.7883
1999-03-22 10:00:00	3	10	7	0	61.388	7	3	75.9437	61.388
1999-03-22 11:00:00	3	11	9	2	61.8524	9	1	57.6104	61.8524
1999-03-22 12:00:00	3	12	8	1	61.6216	10	0	50.1535	61.6216
1999-03-22 13:00:00	3	13	10	0	50.1535	11	-1	43.6467	50.1535
1999-03-22 14:00:00	3	14	10	-3	40.2816	12	-2	37.9703	40.2816
1999-03-22 15:00:00	3	15	11	-3	37.6827	12	-2	37.9703	37.6827
1999-03-22 16:00:00	3	16	11	-4	34.9778	12	-1	40.8537	34.9778
1999-03-22 17:00:00	3	17	11	-5	32.4443	12	-1	40.8537	32.4443
1999-03-22 18:00:00	3	18	11	-4	34.9778	12	-2	37.9703	34.9778
1999-03-22 19:00:00	3	19	7	-3	49.3344	8	1	61.6216	49.3344
1999-03-22 20:00:00	3	20	8	-3	46.0901	6	0	65.7259	46.0901
1999-03-22 21:00:00	3	21	7	-3	49.3344	6	-1	61.1516	49.3344
1999-03-22 22:00:00	3	22	6	-3	52.8311	4	-1	70.2067	52.8311
1999-03-22 23:00:00	3	23	6	-3	52.8311	2	-1	80.757	52.8311
1999-03-23	3	0	6	-3	52.8311	2	-1	80.757	52.8311
1999-03-23 01:00:00	3	1	6	-3	52.8311	2	-1	80.757	52.8311
1999-03-23 02:00:00	3	2	6	-3	52.8311	0	-2	86.576	52.8311
1999-03-23 03:00:00	3	3	5	-2	60.9124	1	-2	80.6176	60.9124
1999-03-23 04:00:00	3	4	5	-4	52.5606	-1	-3	86.474	52.5606
1999-03-23 05:00:00	3	5	5	-4	52.5606	-1	-3	86.474	52.5606
1999-03-23 06:00:00	3	6	6	-4	49.0557	-2	-3	92.9669	49.0557
1999-03-23 07:00:00	3	7	5	-4	52.5606	-2	-3	92.9669	52.5606
1999-03-23 08:00:00	3	8	6	-4	49.0557	1	-2	80.6176	49.0557
1999-03-23 09:00:00	3	9	8	-4	42.7906	4	0	75.4485	42.7906
1999-03-23 10:00:00	3	10	9	-3	43.0786	6	-1	61.1516	43.0786
1999-03-23 11:00:00	3	11	11	-3	37.6827	9	0	53.6251	37.6827
1999-03-23 12:00:00	3	12	13	-4	30.6449	12	-1	40.8537	30.6449
1999-03-23 13:00:00	3	13	14	-4	28.7021	13	-1	38.2556	28.7021
1999-03-23 14:00:00	3	14	15	-4	26.8935	16	-1	31.4892	26.8935
1999-03-23 15:00:00	3	15	15	-3	28.9813	16	-3	27.168	28.9813
1999-03-23 16:00:00	3	16	15	-4	26.8935	16	-3	27.168	26.8935
1999-03-23 17:00:00	3	17	15	-5	24.9385	16	-3	27.168	24.9385
1999-03-23 18:00:00	3	18	13	-4	30.6449	16	-3	27.168	30.6449
1999-03-23 19:00:00	3	19	11	-5	32.4443	12	-1	40.8537	32.4443
1999-03-23 20:00:00	3	20	10	-3	40.2816	8	-1	53.3633	40.2816
1999-03-23 21:00:00	3	21	10	-5	34.6868	8	-1	53.3633	34.6868
1999-03-23 22:00:00	3	22	10	-5	34.6868	7	-1	57.1118	34.6868
1999-03-23 23:00:00	3	23	7	-5	42.4999	7	-2	53.0986	42.4999
1999-03-24	3	0	6	-5	45.5185	3	-1	75.279	45.5185
1999-03-24 01:00:00	3	1	3	-4	60.4252	3	-1	75.279	60.4252
1999-03-24 02:00:00	3	2	4	-4	56.3424	1	-2	80.6176	56.3424
1999-03-24 03:00:00	3	3	4	-4	56.3424	1	-2	80.6176	56.3424
1999-03-24 04:00:00	3	4	4	-5	52.2871	0	-3	80.4763	52.2871
1999-03-24 05:00:00	3	5	5	-5	48.7741	-1	-3	86.474	48.7741
1999-03-24 06:00:00	3	6	4	-4	56.3424	-1	-3	86.474	56.3424
1999-03-24 07:00:00	3	7	4	-4	56.3424	-1	-3	86.474	56.3424
1999-03-24 08:00:00	3	8	6	-4	49.0557	3	-1	75.279	49.0557
1999-03-24 09:00:00	3	9	8	-4	42.7906	5	-1	65.5075	42.7906
1999-03-24 10:00:00	3	10	11	-4	34.9778	8	0	57.3625	34.9778
1999-03-24 11:00:00	3	11	13	-3	33.0193	11	0	46.927	33.0193
1999-03-24 12:00:00	3	12	14	-3	30.9281	13	-1	38.2556	30.9281
1999-03-24 13:00:00	3	13	16	-2	29.2589	14	-1	35.8377	29.2589
1999-03-24 14:00:00	3	14	16	-2	29.2589	16	-1	31.4892	29.2589
1999-03-24 15:00:00	3	15	18	-3	23.9031	17	-1	29.5348	23.9031
1999-03-24 16:00:00	3	16				18	-3	23.9031
1999-03-24 17:00:00	3	17	18	-4	22.1764	18	-3	23.9031	22.1764
1999-03-24 18:00:00	3	18	17	-1	29.5348	17	0	31.767	29.5348
1999-03-24 19:00:00	3	19	15	-3	28.9813	14	1	41.4161	28.9813
1999-03-24 20:00:00	3	20	13	-4	30.6449	9	1	57.6104	30.6449
1999-03-24 21:00:00	3	21				11	-1	43.6467
1999-03-24 22:00:00	3	22	10	-3	40.2816	7	0	61.388	40.2816
1999-03-24 23:00:00	3	23	9	-3	43.0786	5	0	70.4031	43.0786
1999-03-25	3	0	10	-5	34.6868	5	-1	65.5075	34.6868
1999-03-25 01:00:00	3	1	9	-6	34.3936	3	-1	75.279	34.3936
1999-03-25 02:00:00	3	2	8	-6	36.8058	2	-1	80.757	36.8058
1999-03-25 03:00:00	3	3	8	-6	36.8058	1	-2	80.6176	36.8058
1999-03-25 04:00:00	3	4	8	-6	36.8058	0	-4	74.756	36.8058
1999-03-25 05:00:00	3	5	9	-6	34.3936	2	-2	75.107	34.3936
1999-03-25 06:00:00	3	6	9	-7	31.8612	0	-2	86.576	31.8612
1999-03-25 07:00:00	3	7	8	-7	34.0982	0	-2	86.576	34.0982
1999-03-25 08:00:00	3	8	10	-6	32.1537	2	-1	80.757	32.1537
1999-03-25 09:00:00	3	9	13	-4	30.6449	8	0	57.3625	30.6449
1999-03-25 10:00:00	3	10	16	-5	23.3748	11	0	46.927	23.3748
1999-03-25 11:00:00	3	11	16	-4	25.209	15	-1	33.5864	25.209
[truncated: 156,876 more rows]

## Sheet: Brookings vs. Sioux raw data
Month	Day	Time	Temp (Brookings)	Dewpoint (Brookings)	RH (Brookings)		Temp (Sioux)	Dewpoint (Sioux)	RH (Sioux)
7	2006-07-01	09:00:00	22	19	83.1077		26.7	18.9	62.3203
7	2006-07-02	09:00:00	25	16	57.3933		26.1	17.2	58.0243
7	2006-07-03	09:00:00	25	18	65.1455		26.7	17.2	56.0061
7	2006-07-04	09:00:00	25	11	41.4488		21.7	13.3	58.848
7	2006-07-05	09:00:00	25	12	44.2818		21.1	12.2	56.809
7	2006-07-06	09:00:00	25	13	47.284		22.8	12.8	53.2686
7	2006-07-07	09:00:00	25	13	47.284		21.7	13.9	61.1897
7	2006-07-08	09:00:00	25	18	65.1455		24.4	17.2	64.2019
7	2006-07-09	09:00:00	25	13	47.284		25.6	18.9	66.5073
7	2006-07-10	09:00:00	25	12	44.2818		20	12.8	63.2358
7	2006-07-11	09:00:00	25	18	65.1455		23.3	18.3	73.5132
7	2006-07-12	09:00:00	25	19	69.3555		20.6	19.4	92.84
7	2006-07-13	09:00:00	25	21	78.4976		26.1	20.6	71.7464
7	2006-07-14	09:00:00	25	20	73.8025		26.7	20.6	69.2509
7	2006-07-15	09:00:00	25	19	69.3555		28.9	20	58.686
7	2006-07-16	09:00:00	25	M	#VALUE!		27.8	19.4	60.2767
7	2006-07-17	09:00:00	25	14	50.464		27.2	16.7	52.6882
7	2006-07-18	09:00:00	25	12	44.2818		24.4	12.2	46.5063
7	2006-07-19	09:00:00	25	18	65.1455		26.1	21.7	76.7573
7	2006-07-20	09:00:00	25	12	44.2818		25	13.3	48.2189
7	2006-07-21	09:00:00	25	14	50.464		18.3	15	81.0894
7	2006-07-22	09:00:00	25	14	50.464		25	14.4	51.7877
7	2006-07-23	09:00:00	25	13	47.284		26.7	15	48.673
7	2006-07-24	09:00:00	25	16	57.3933		26.7	13.9	45.3339
7	2006-07-25	09:00:00	25	19	69.3555		25	18.9	68.9241
7	2006-07-26	09:00:00	25	18	65.1455		25.6	20.6	73.9036
7	2006-07-27	09:00:00	25	19	69.3555		25.6	20	71.2147
7	2006-07-28	09:00:00	25	21	78.4976		28.9	21.7	65.1553
7	2006-07-29	09:00:00	25	M	#VALUE!		29.4	22.8	67.6817
7	2006-07-30	09:00:00	25	21	78.4976		29.4	20.6	59.1664
7	2006-07-31	09:00:00	25	18	65.1455		30.6	17.8	46.3856
8	2006-08-01	09:00:00	25	M	#VALUE!		23.9	22.2	90.2263
8	2006-08-02	09:00:00	25	M	#VALUE!		21.7	16.7	73.2368
8	2006-08-03	09:00:00	25	M	#VALUE!		24.4	14.4	53.6782
8	2006-08-04	09:00:00	25	15	53.8306		25	16.7	60.0089
8	2006-08-05	09:00:00	25	19	69.3555		23.9	18.9	73.6158
8	2006-08-06	09:00:00	25	11	41.4488		23.3	11.7	48.0768
8	2006-08-07	09:00:00	25	14	50.464		23.3	15	59.6114
8	2006-08-08	09:00:00	25	16	57.3933		21.1	17.2	78.4247
8	2006-08-09	09:00:00	25	21	78.4976		22.2	21.1	93.4956
8	2006-08-10	09:00:00	25	21	78.4976		24.4	21.7	84.9292
8	2006-08-11	09:00:00	25	19	69.3555		23.9	18.3	70.9032
8	2006-08-12	09:00:00	25	19	69.3555		22.2	19.4	84.1723
8	2006-08-13	09:00:00	25	19	69.3555		21.7	20	90.071
8	2006-08-14	09:00:00	25	17	61.1616		20	16.1	78.2639
8	2006-08-15	09:00:00	25	15	53.8306		22.8	14.4	59.1104
8	2006-08-16	09:00:00	25	16	57.3933		23.3	15.6	61.9519
8	2006-08-17	09:00:00	25	19	69.3555		23.3	19.4	78.7412
8	2006-08-18	09:00:00	25	19	69.3555		22.8	20	84.2381
8	2006-08-19	09:00:00	25	14	50.464		17.8	14.4	80.502
8	2006-08-20	09:00:00	25	15	53.8306		20.6	15	70.285
8	2006-08-21	09:00:00	25	18	65.1455		22.2	17.8	76.1531
8	2006-08-22	09:00:00	25	15	53.8306		23.3	14.4	57.3491
8	2006-08-23	09:00:00	25	19	69.3555		25	18.9	68.9241
8	2006-08-24	09:00:00	25	21	78.4976		26.7	21.7	74.0874
8	2006-08-25	09:00:00	25	16	57.3933		20	16.1	78.2639
8	2006-08-26	09:00:00	25	16	57.3933		22.8	16.1	65.928
8	2006-08-27	09:00:00	25	15	53.8306		22.8	14.4	59.1104
8	2006-08-28	09:00:00	25	14	50.464		17.2	16.1	93.2515
8	2006-08-29	09:00:00	25	12	44.2818		19.4	12.2	63.1014
8	2006-08-30	09:00:00	25	13	47.284		20.6	11.7	56.685
8	2006-08-31	09:00:00	25	15	53.8306		20.6	14.4	67.6176
9	2006-09-01	09:00:00	25	16	57.3933		18.3	16.1	87.0096
9	2006-09-02	09:00:00	25	11	41.4488		13.3	11.1	86.5319
9	2006-09-03	09:00:00	25	11	41.4488		13.9	10	77.3406
9	2006-09-04	09:00:00	25	14	50.464		17.2	13.3	77.8468
9	2006-09-05	09:00:00	25	14	50.464		19.4	13.9	70.512
9	2006-09-06	09:00:00	25	14	50.464		20	13.9	67.935
9	2006-09-07	09:00:00	25	14	50.464		20	12.8	63.2358
9	2006-09-08	09:00:00	25	13	47.284		17.2	13.3	77.8468
9	2006-09-09	09:00:00	25	8	33.8844		12.8	10.6	86.4827
9	2006-09-10	09:00:00	25	11	41.4488		12.2	11.1	92.9935
9	2006-09-11	09:00:00	25	10	38.7768		12.8	10.6	86.4827
9	2006-09-12	09:00:00	25	11	41.4488		11.7	11.1	96.1078
9	2006-09-13	09:00:00	25	12	44.2818		17.2	12.2	72.4377
9	2006-09-14	09:00:00	25	13	47.284		20	13.3	65.3351
9	2006-09-15	09:00:00	25	12	44.2818		22.2	11.7	51.3928
9	2006-09-16	09:00:00	25	16	57.3933		20.6	16.1	75.4164
9	2006-09-17	09:00:00	25	4	25.7046		10	3.3	63.1016
9	2006-09-18	09:00:00	25	6	29.5453		7.8	6.7	92.7542
9	2006-09-19	09:00:00	25	3	23.9555		8.9	1.1	58.0882
9	2006-09-20	09:00:00	25	2	22.3125		6.7	2.8	76.1777
9	2006-09-21	09:00:00	25	9	36.2579		11.1	9.4	89.2697
9	2006-09-22	09:00:00	25	9	36.2579		12.2	11.1	92.9935
9	2006-09-23	09:00:00	25	11	41.4488		12.2	11.1	92.9935
9	2006-09-24	09:00:00	25	6	29.5453		11.7	6.7	71.4152
9	2006-09-25	09:00:00	25	8	33.8844		14.4	8.3	66.7757
9	2006-09-26	09:00:00	25	9	36.2579		15.6	9.4	66.58
9	2006-09-27	09:00:00	25	7	31.6492		12.2	7.2	71.5103
9	2006-09-28	09:00:00	25	3	23.9555		7.8	3.9	76.3607
9	2006-09-29	09:00:00	25	6	29.5453		12.8	6.1	63.7458
9	2006-09-30	09:00:00	25	7	31.6492		16.1	7.8	57.8708
10	2006-10-01	09:00:00	17	10			21.1	9.4
10	2006-10-02	09:00:00	12	11			18.3	11.7
10	2006-10-03	09:00:00	18	12			20.6	15
10	2006-10-04	09:00:00	8	6			11.1	6.7
10	2006-10-05	09:00:00	10	4			10	5
10	2006-10-06	09:00:00	14	7			15.6	7.2
10	2006-10-07	09:00:00	19	11			19.4	11.7
10	2006-10-08	09:00:00	11	6			11.1	8.3
10	2006-10-09	09:00:00	7	2			8.9	2.2
10	2006-10-10	09:00:00	6	2			7.2	1.1
10	2006-10-11	09:00:00	-1	-5			0.6	-5
10	2006-10-12	09:00:00	-3	-8			-1.7	-8.3
10	2006-10-13	09:00:00	-1	-4			0.6	-5
10	2006-10-14	09:00:00	-1	-6			1.1	-6.7
10	2006-10-15	09:00:00	7	-1			10.6	0
10	2006-10-16	09:00:00	12	12			13.9	13.3
10	2006-10-17	09:00:00	6	4			7.2	5
10	2006-10-18	09:00:00	0	-1			1.1	-0.6
10	2006-10-19	09:00:00	-2	-3			0	-3.3
10	2006-10-20	09:00:00	4	1			6.7	3.9
10	2006-10-21	09:00:00	-1	-7			1.1	-5
10	2006-10-22	09:00:00	-2	-7			0.6	-6.7
10	2006-10-23	09:00:00	-2	-6			-0.6	-6.1
10	2006-10-24	09:00:00	1	-4			1.7	-5
10	2006-10-25	09:00:00	S	S			3.3	-1.7
10	2006-10-26	09:00:00	4	-1			6.7	1.1
10	2006-10-27	09:00:00	3	1			5	1.7
10	2006-10-28	09:00:00	4	-2			4.4	-2.8
10	2006-10-29	09:00:00	3	-2			5.6	-0.6
10	2006-10-30	09:00:00	7	3			10	4.4
10	2006-10-31	09:00:00	-5	-11			-3.3	-12.2
11	2006-11-01	09:00:00	-5	-9			-3.9	-10
11	2006-11-02	09:00:00	-6	-10			-5.6	-10.6
11	2006-11-03	09:00:00	-4	-8			-2.8	-10
11	2006-11-04	09:00:00	2	-3			2.2	-2.2
11	2006-11-05	09:00:00	3	-3			3.9	-1.7
11	2006-11-06	09:00:00	2	1			4.4	1.1
11	2006-11-07	09:00:00	7	2			10.6	1.1
11	2006-11-08	09:00:00	11	5			14.4	5.6
11	2006-11-09	09:00:00	2	-3			3.9	-1.7
11	2006-11-10	09:00:00	-2	-4			-0.6	-3.3
11	2006-11-11	09:00:00	-8	-10			-4.4	-8.9
11	2006-11-12	09:00:00	1	-3			2.8	-2.2
11	2006-11-13	09:00:00	-3	-4			1.1	-1.7
11	2006-11-14	09:00:00	3	0			5	0.6
11	2006-11-15	09:00:00	-3	-5			-0.6	-2.8
11	2006-11-16	09:00:00	-7	-7			-4.4	-6.1
11	2006-11-17	09:00:00	-1	-1			-1.1	-2.8
11	2006-11-18	09:00:00	-7	-7			-2.8	-6.1
11	2006-11-19	09:00:00	-4	-6			-4.4	-6.1
11	2006-11-20	09:00:00	-4	-6			-2.8	-5
11	2006-11-21	09:00:00	-1	-3			3.3	-3.3
11	2006-11-22	09:00:00	2	-1			3.9	0
11	2006-11-23	09:00:00	6	-3			4.4	0.6
11	2006-11-24	09:00:00	1	-3			2.8	-2.8
11	2006-11-25	09:00:00	-2	-5			-2.2	-5
11	2006-11-26	09:00:00	-6	-9			-3.9	-6.1
11	2006-11-27	09:00:00	-3	-6			-2.2	-3.3
11	2006-11-28	09:00:00	2	1			2.2	1.1
11	2006-11-29	09:00:00	-16	-19			-12.2	-17.8
11	2006-11-30	09:00:00	-16	-17			-13.9	-17.8
12	2006-12-01	09:00:00	-12	-14			-11.7	-16.1
12	2006-12-02	09:00:00	-14	-18			-12.2	-18.9
12	2006-12-03	09:00:00	-18	-19			-16.7	-20
12	2006-12-04	09:00:00	-11	-14			-7.2	-13.9
12	2006-12-05	09:00:00	-4	-10			-2.2	-9.4
12	2006-12-06	09:00:00	-4	-8			-2.8	-6.1
12	2006-12-07	09:00:00	-20	-22			-18.3	-21.7
12	2006-12-08	09:00:00	-9	-14			-7.2	-14.4
12	2006-12-09	09:00:00	-5	-6			-3.9	-7.2
12	2006-12-10	09:00:00	-2	-3			1.1	-1.1
12	2006-12-11	09:00:00	-7	-7			-6.1	-8.3
12	2006-12-12	09:00:00	-2	-3			-1.7	-3.3
12	2006-12-13	09:00:00	-3	-3			-0.6	-3.9
12	2006-12-14	09:00:00	3	-1			5	-0.6
12	2006-12-15	09:00:00	-8	-8			-4.4	-5.6
12	2006-12-16	09:00:00	-1	-4			1.7	-3.9
12	2006-12-17	09:00:00	-3	-10			-1.1	-10
12	2006-12-18	09:00:00	-11	-13			-6.7	-10.6
12	2006-12-19	09:00:00	-8	-11			-6.7	-10.6
12	2006-12-20	09:00:00	2	-8			0.6	-1.7
12	2006-12-21	09:00:00	-1	-2			0.6	-0.6
12	2006-12-22	09:00:00	-2	-2			0	-1.1
12	2006-12-23	09:00:00	-3	-5			-1.1	-4.4
12	2006-12-24	09:00:00	-3	-5			-0.6	-3.9
12	2006-12-25	09:00:00	-8	-9			-5	-7.8
12	2006-12-26	09:00:00	-6	-9			-4.4	-8.3
12	2006-12-27	09:00:00	0	-2			-0.6	-2.8
12	2006-12-28	09:00:00	-1	-1			-0.6	-2.2
12	2006-12-29	09:00:00	0	-1			0.6	0
12	2006-12-30	09:00:00	0	-1			1.7	1.1
12	2006-12-31	09:00:00	-5	-6			-2.8	-5
1	2007-01-01	09:00:00	-10	-12			-8.3	-11.1
1	2007-01-02	09:00:00	-7	-9			-4.4	-8.9
1	2007-01-03	09:00:00	-1	-3			1.1	-3.9
1	2007-01-04	09:00:00	-2	-2			2.8	-1.1
1	2007-01-05	09:00:00	-2	-3			0.6	-0.6
1	2007-01-06	09:00:00	-5	-7			-3.3	-6.7
1	2007-01-07	09:00:00	-1	-4			0	-3.3
1	2007-01-08	09:00:00	-3	-7			-2.8	-6.7
1	2007-01-09	09:00:00	-8	-11			-5	-8.9
1	2007-01-10	09:00:00	-4	-7			-2.2	-7.2
1	2007-01-11	09:00:00	-8	-12			-3.9	-7.2
1	2007-01-12	09:00:00	-21	-24			-18.3	-23.3
1	2007-01-13	09:00:00	-17	-26			-15.6	-20.6
1	2007-01-14	09:00:00	-11	-18			-8.9	-16.1
1	2007-01-15	09:00:00	-22	-23			-21.7	-25
1	2007-01-16	09:00:00	-20	M			-26.1	-28.3
1	2007-01-17	09:00:00	-10	-13			-10.6	-14.4
1	2007-01-18	09:00:00	-6	-7			-6.7	-8.9
1	2007-01-19	09:00:00	-10	-12			-9.4	-12.8
1	2007-01-20	09:00:00	-9	-11			-9.4	-12.2
1	2007-01-21	09:00:00	-4	-4			-3.9	-5.6
1	2007-01-22	09:00:00	-12	-13			-10.6	-11.7
1	2007-01-23	09:00:00	-3	-4			-1.7	-3.3
1	2007-01-24	09:00:00	-2	-4			-0.6	-4.4
1	2007-01-25	09:00:00	-8	-9			-7.8	-9.4
1	2007-01-26	09:00:00	-3	-3			-2.2	-4.4
1	2007-01-27	09:00:00	-13	-19			-10.6	-15.6
1	2007-01-28	09:00:00	-22	-23			-22.2	-26.1
1	2007-01-29	09:00:00	-9	-13			-6.1	-12.2
1	2007-01-30	09:00:00	-22	-24			-21.1	-25
1	2007-01-31	09:00:00	-15	-16			-10.6	-13.9
2	2007-02-01	09:00:00	-17	M			-17.2	-19.4
2	2007-02-02	09:00:00	-19	-34			-18.9	-23.9
2	2007-02-03	09:00:00	S	S			-24.4	-28.9
2	2007-02-04	09:00:00	-24	-29			-22.8	-27.2
2	2007-02-05	09:00:00	-21	M			-19.4	-23.3
2	2007-02-06	09:00:00	-15	-23			-13.9	-16.7
2	2007-02-07	09:00:00	-19	-30			-17.2	-21.7
2	2007-02-08	09:00:00	-22	-33			-19.4	-23.9
2	2007-02-09	09:00:00	-17	-28			-15	-22.8
2	2007-02-10	09:00:00	-21	M			-18.3	-21.7
2	2007-02-11	09:00:00	-9	-9			-7.8	-9.4
2	2007-02-12	09:00:00	-13	-18			-8.3	-11.7
2	2007-02-13	09:00:00	-19	-24			-16.1	-19.4
2	2007-02-14	09:00:00	-21	-29			-20.6	-25
2	2007-02-15	09:00:00	-25	M			-23.3	-26.1
2	2007-02-16	09:00:00	-13	-28			-11.7	-16.1
2	2007-02-17	09:00:00	-7	-10			-6.7	-10.6
2	2007-02-18	09:00:00	-7	-7			-5.6	-7.2
2	2007-02-19	09:00:00	-2	-5			1.7	-2.2
2	2007-02-20	09:00:00	-6	-7			-3.3	-4.4
2	2007-02-21	09:00:00	1	-2			0.6	-1.7
2	2007-02-22	09:00:00	-8	-10			-3.9	-8.3
2	2007-02-23	09:00:00	-1	-6			0.6	-5.6
2	2007-02-24	09:00:00	0	-2			0	-1.7
2	2007-02-25	09:00:00	-6	-7			-4.4	-6.1
2	2007-02-26	09:00:00	-7	-8			-6.7	-8.9
2	2007-02-27	09:00:00	-8	-8			-7.2	-9.4
2	2007-02-28	09:00:00	-4	-6			-2.2	-5
3	2007-03-01	09:00:00	-2	-3			-1.1	-2.8
3	2007-03-02	09:00:00	-7	-9			-5.6	-7.8
3	2007-03-03	09:00:00	-14	-18			-12.8	-17.8
3	2007-03-04	09:00:00	-7	-12			-5	-10
3	2007-03-05	09:00:00	-13	-16			-8.3	-13.3
3	2007-03-06	09:00:00	-11	-17			-9.4	-15.6
3	2007-03-07	09:00:00	-9	-9			-7.2	-9.4
3	2007-03-08	09:00:00	-2	-3			-1.7	-2.8
3	2007-03-09	09:00:00	3	-1			3.3	0
3	2007-03-10	09:00:00	1	-1			2.8	0
3	2007-03-11	09:00:00	1	-2			5	0.6
3	2007-03-12	09:00:00	4	2			7.8	3.9
3	2007-03-13	09:00:00	5	3			10.6	4.4
3	2007-03-14	09:00:00	1	-6			2.8	-1.7
3	2007-03-15	09:00:00	0	-2			1.1	-1.7
3	2007-03-16	09:00:00	-7	-8			-5	-7.8
3	2007-03-17	09:00:00	-1	-2			0.6	-2.2
3	2007-03-18	09:00:00	1	-2			1.1	-2.8
3	2007-03-19	09:00:00	1	-6			3.9	-5.6
3	2007-03-20	09:00:00	0	-4			1.1	-5
3	2007-03-21	09:00:00	9	8			11	10
3	2007-03-22	09:00:00	1	-2			4.4	-3.3
3	2007-03-23	09:00:00	7	3			8.3	2.8
3	2007-03-24	09:00:00	10	4			10.6	9.4
3	2007-03-25	09:00:00	14	12			15	10.6
3	2007-03-26	09:00:00	12	9			15.6	8.9
3	2007-03-27	09:00:00	5	2			6.7	2.2
3	2007-03-28	09:00:00	9	8			11	10
3	2007-03-29	09:00:00	9	9			10.6	10
3	2007-03-30	09:00:00	6	6			9.4	8.3
3	2007-03-31	09:00:00	3	3			6.7	5.6
4	2007-04-01	09:00:00	1	0			2.8	1.1
4	2007-04-02	09:00:00	3	1			5	0.6
4	2007-04-03	09:00:00	-4	-7			-1.7	-5
4	2007-04-04	09:00:00	-8	-12			-5.6	-12.2
4	2007-04-05	09:00:00	-7	-12			-4.4	-12.8
4	2007-04-06	09:00:00	-8	-14			-6.7	-13.9
4	2007-04-07	09:00:00	-8	-15			-6.1	-15
4	2007-04-08	09:00:00	-5	-12			-2.8	-11.7
4	2007-04-09	09:00:00	-2	-9			-1.7	-9.4
4	2007-04-10	09:00:00	0	-1			1.1	-0.6
4	2007-04-11	09:00:00	0	-1			0.9	-0.5
4	2007-04-12	09:00:00	-1	-3			0.6	-2.8
4	2007-04-13	09:00:00	-1	-3			1.7	-1.1
4	2007-04-14	09:00:00	6	3			7.2	2.8
4	2007-04-15	09:00:00	8	1			10.6	0.6
4	2007-04-16	09:00:00	12	6			14.4	5.6
4	2007-04-17	09:00:00	8	1			8.9	1.7
4	2007-04-18	09:00:00	8	2			9.4	2.8
4	2007-04-19	09:00:00	11	3			11.7	2.8
4	2007-04-20	09:00:00	12	6			13.9	6.1
4	2007-04-21	09:00:00	15	12			17.2	11.7
4	2007-04-22	09:00:00	13	13			14.4	12.2
4	2007-04-23	09:00:00	11	6			12.8	6.7
4	2007-04-24	09:00:00	9	1			9.4	6.1
4	2007-04-25	09:00:00	9	0			10	2.8
4	2007-04-26	09:00:00	12	5			10.6	5.6
4	2007-04-27	09:00:00	14	9			15	8.9
4	2007-04-28	09:00:00	17	7			17.8	6.7
4	2007-04-29	09:00:00	21	9			23.3	11.7
4	2007-04-30	09:00:00	18	3			19.4	7.8
5	2007-05-01	09:00:00	12	2			13.9	3.3
5	2007-05-02	09:00:00	13	3			13.9	3.9
5	2007-05-03	09:00:00	14	7			13.9	7.2
5	2007-05-04	09:00:00	12	11			13.9	12.8
5	2007-05-05	09:00:00	16	14			16.7	15
5	2007-05-06	09:00:00	13	11			15	12.2
5	2007-05-07	09:00:00	S	S			15.6	13.9
5	2007-05-08	09:00:00	16	11			16.7	11.1
5	2007-05-09	09:00:00	19	12			21.1	12.2
5	2007-05-10	09:00:00	20	14			21.7	14.4
5	2007-05-11	09:00:00	15	5			17.2	7.2
5	2007-05-12	09:00:00	16	5			17.2	9.4
5	2007-05-13	09:00:00	24	13			24.4	13.3
5	2007-05-14	09:00:00	22	15			22.2	14.4
5	2007-05-15	09:00:00	11	3			11.7	4.4
5	2007-05-16	09:00:00	11	2			12.2	3.3
5	2007-05-17	09:00:00	14	2			14.4	2.2
5	2007-05-18	09:00:00	19	11			18.9	9.4
5	2007-05-19	09:00:00	19	13			20	13.3
5	2007-05-20	09:00:00	13	8			20	16.1
5	2007-05-21	09:00:00	21	15			20	15.6
5	2007-05-22	09:00:00	20	15			20.6	15
5	2007-05-23	09:00:00	16	12			16.7	13.9
5	2007-05-24	09:00:00	10	6			11.1	6.7
5	2007-05-25	09:00:00	15	6			15.6	7.2
5	2007-05-26	09:00:00	10	5			12.8	6.1
5	2007-05-27	09:00:00	12	3			12.2	3.3
5	2007-05-28	09:00:00	21	16			19.4	15.6
5	2007-05-29	09:00:00	S	S			21.7	17.8
5	2007-05-30	09:00:00	18	17			19.4	16.7
5	2007-05-31	09:00:00	17	12			17.8	12.8
6	2007-06-01	09:00:00	14	13			17.2	13.9
6	2007-06-02	09:00:00	14	13			13.9	13.3
6	2007-06-03	09:00:00	18	15			19.4	14.4
6	2007-06-04	09:00:00	18	11			21.7	12.8
6	2007-06-05	09:00:00	14	6			16.7	9.4
6	2007-06-06	09:00:00	17	11			20	11.7
6	2007-06-07	09:00:00	20	12			20	10.6
6	2007-06-08	09:00:00	14	4			15.6	4.4
6	2007-06-09	09:00:00	19	8			21.1	8.9
6	2007-06-10	09:00:00	23	14			23.9	15.6
6	2007-06-11	09:00:00	24	19			25.6	20
6	2007-06-12	09:00:00	24	18			25	18.3
6	2007-06-13	09:00:00	18	18			21.7	18.9
6	2007-06-14	09:00:00	22	19			22.2	18.9
6	2007-06-15	09:00:00	23	19			24.4	18.3
6	2007-06-16	09:00:00	21	17			25.6	20.6
6	2007-06-17	09:00:00	24	19			25.6	18.9
6	2007-06-18	09:00:00	19	15			20.6	16.7
6	2007-06-19	09:00:00	18	8			20	11.1
6	2007-06-20	09:00:00	24	14			25	13.9
6	2007-06-21	09:00:00	21	17			26.1	18.9
6	2007-06-22	09:00:00	22	17			23.9	18.3
6	2007-06-23	09:00:00	19	17			20	16.7
6	2007-06-24	09:00:00	22	18			23.3	17.8
6	2007-06-25	09:00:00	24	20			25.6	20
6	2007-06-26	09:00:00	25	20			26.7	20.6
6	2007-06-27	09:00:00	21	9			22.8	12.2
6	2007-06-28	09:00:00	15	7			16.7	8.9
6	2007-06-29	09:00:00	19	11			20.6	11.7
6	2007-06-30	09:00:00	21	16			22.2	15
7	2007-07-01	09:00:00	25	14	50.464		21.7	14.4	63.2034
7	2007-07-02	09:00:00	25	18	65.1455		22.8	17.8	73.4273
7	2007-07-03	09:00:00	25	19	69.3555		25	20	73.8025
7	2007-07-04	09:00:00	25	S	#VALUE!		27.2	18.3	58.2859
7	2007-07-05	09:00:00	25	17	61.1616		27.2	16.1	50.7143
7	2007-07-06	09:00:00	25	13	47.284		26.1	13.3	45.1701
7	2007-07-07	09:00:00	25	19	69.3555		27.2	20	64.7991
7	2007-07-08	09:00:00	25	S	#VALUE!		28.3	17.2	50.9996
7	2007-07-09	09:00:00	25	16	57.3933		23.9	16.7	64.0938
7	2007-07-10	09:00:00	25	12	44.2818		21.1	13.3	61.0511
7	2007-07-11	09:00:00	25	9	36.2579		21.1	11.1	52.8287
7	2007-07-12	09:00:00	25	S	#VALUE!		18.3	11.7	65.3988
7	2007-07-13	09:00:00	25	11	41.4488		21.1	10.6	51.1022
7	2007-07-14	09:00:00	25	14	50.464		25	14.4	51.7877
7	2007-07-15	09:00:00	25	15	53.8306		23.9	13.9	53.5507
7	2007-07-16	09:00:00	25	18	65.1455		25	17.8	64.331
7	2007-07-17	09:00:00	25	21	78.4976		27.2	21.7	71.9422
7	2007-07-18	09:00:00	25	22	83.4526		27.8	23.3	76.5504
7	2007-07-19	09:00:00	25	13	47.284		24.4	15	55.7957
7	2007-07-20	09:00:00	25	12	44.2818		21.7	11.7	52.9845
7	2007-07-21	09:00:00	25	16	57.3933		21.7	16.1	70.4931
7	2007-07-22	09:00:00	25	20	73.8025		25	20.6	76.5891
7	2007-07-23	09:00:00	25	23	88.6796		27.8	22.2	71.6111
7	2007-07-24	09:00:00	25	22	83.4526		27.8	22.8	74.2695
7	2007-07-25	09:00:00	25	21	78.4976		26.1	21.1	73.9874
7	2007-07-26	09:00:00	25	21	78.4976		27.8	20.6	64.9254
7	2007-07-27	09:00:00	25	16	57.3933		25.6	16.1	55.7354
7	2007-07-28	09:00:00	25	15	53.8306		23.3	15	59.6114
7	2007-07-29	09:00:00	25	18	65.1455		25	16.1	57.7607
7	2007-07-30	09:00:00	25	19	69.3555		26.1	20	69.1361
7	2007-07-31	09:00:00	25	20	73.8025		26.7	20	66.7313
8	2007-08-01	09:00:00	25	21	78.4976		25.6	21.1	76.2119
8	2007-08-02	09:00:00	25	13	47.284		23.3	16.1	63.9635
8	2007-08-03	09:00:00	25	13	47.284		25	12.8	46.6696
8	2007-08-04	09:00:00	25	16	57.3933		21.1	18.3	84.0507
8	2007-08-05	09:00:00	25	16	57.3933		21.1	18.3	84.0507
8	2007-08-06	09:00:00	25	20	73.8025		22.2	20	87.3652
8	2007-08-07	09:00:00	25	19	69.3555		24.4	21.7	84.9292
8	2007-08-08	09:00:00	25	16	57.3933		21	18	82.9904
8	2007-08-09	09:00:00	25	20	73.8025		24.4	20.6	79.3849
8	2007-08-10	09:00:00	25	18	65.1455		22.8	16.7	68.4941
8	2007-08-11	09:00:00	25	22	83.4526		26.7	21.1	71.4138
8	2007-08-12	09:00:00	25	12	44.2818		21.1	13.3	61.0511
8	2007-08-13	09:00:00	25	19	69.3555		25.6	20	71.2147
8	2007-08-14	09:00:00	25	19	69.3555		22.8	19.4	81.1595
8	2007-08-15	09:00:00	25	18	65.1455		24.4	20.6	79.3849
8	2007-08-16	09:00:00	25	14	50.464		22.8	15	61.4422
8	2007-08-17	09:00:00	25	11	41.4488		20.6	11.1	54.4787
8	2007-08-18	09:00:00	25	16	57.3933		17.2	15.6	90.3187
8	2007-08-19	09:00:00	25	13	47.284		20.6	18.3	86.6759
8	2007-08-20	09:00:00	25	18	65.1455		21.1	19.4	90.028
8	2007-08-21	09:00:00	25	19	69.3555		22.8	19.4	81.1595
8	2007-08-22	09:00:00	25	19	69.3555		19.4	18.3	93.3606
8	2007-08-23	09:00:00	25	17	61.1616		18.9	17.8	93.336
8	2007-08-24	09:00:00	25	13	47.284		20.6	15	70.285
8	2007-08-25	09:00:00	25	12	44.2818		18.3	11.7	65.3988
8	2007-08-26	09:00:00	25	17	61.1616		22.8	17.2	70.6991
8	2007-08-27	09:00:00	25	22	83.4526		26.1	21.7	76.7573
8	2007-08-28	09:00:00	25	18	65.1455		22.8	20.6	87.4187
8	2007-08-29	09:00:00	25	11	41.4488		17.8	11.7	67.4862
8	2007-08-30	09:00:00	25	11	41.4488		18.9	10.6	58.5589
8	2007-08-31	09:00:00	25	16	57.3933		21.7	14.4	63.2034
9	2007-09-01	09:00:00	25	16	57.3933		22.2	16.1	68.3754
9	2007-09-02	09:00:00	25	16	57.3933		22.2	15.6	66.225
9	2007-09-03	09:00:00	25	18	65.1455		23.9	16.7	64.0938
9	2007-09-04	09:00:00	25	15	53.8306		23.9	15.6	59.7523
9	2007-09-05	09:00:00	25	19	69.3555		24.4	20	76.4966
9	2007-09-06	09:00:00	25	19	69.3555		23.9	20	78.8264
9	2007-09-07	09:00:00	25	12	44.2818		18.9	13.9	72.7434
9	2007-09-08	09:00:00	25	10	38.7768		14.4	10	74.8765
9	2007-09-09	09:00:00	25	6	29.5453		11.7	7.2	73.9051
9	2007-09-10	09:00:00	25	9	36.2579		12.2	9.4	83.0151
9	2007-09-11	09:00:00	25	6	29.5453		13.9	7.8	66.6695
9	2007-09-12	09:00:00	25	2	22.3125		11.7	2.8	54.4024
9	2007-09-13	09:00:00	25	3	23.9555		15	9.4	69.194
9	2007-09-14	09:00:00	25	1	20.7701		8.9	2.8	65.5814
9	2007-09-15	09:00:00	25	1	20.7701		8.3	2.2	65.4476
9	2007-09-16	09:00:00	25	7	31.6492		9.4	8.3	92.8426
9	2007-09-17	09:00:00	25	18	65.1455		23.3	17.8	71.2394
9	2007-09-18	09:00:00	25	18	65.1455		20.6	17.8	83.995
9	2007-09-19	09:00:00	25	9	36.2579		13.3	9.4	77.2468
9	2007-09-20	09:00:00	25	16	57.3933		21.1	16.7	75.9787
9	2007-09-21	09:00:00	25	16	57.3933		25	16.1	57.7607
9	2007-09-22	09:00:00	25	8	33.8844		17.2	7.8	53.9654
9	2007-09-23	09:00:00	25	16	57.3933		23.3	16.7	66.4532
9	2007-09-24	09:00:00	25	19	69.3555		22.8	18.9	78.6698
9	2007-09-25	09:00:00	25	7	31.6492		11.7	7.8	76.994
9	2007-09-26	09:00:00	25	8	33.8844		13.3	8.3	71.718
9	2007-09-27	09:00:00	25	7	31.6492		17.8	7.2	49.8757
9	2007-09-28	09:00:00	25	5	27.5659		14.4	5	53.2285
9	2007-09-29	09:00:00	25	15	53.8306		18.3	14.4	78.012
9	2007-09-30	09:00:00	25	16	57.3933		18.9	15	78.1014
10	2007-10-01	09:00:00	12	10			13.9	10
10	2007-10-02	09:00:00	19	15			20.6	15.6
10	2007-10-03	09:00:00	13	4			16.1	2.8
10	2007-10-04	09:00:00	15	9			18.9	10
10	2007-10-05	09:00:00	19	18			21.7	18.3
10	2007-10-06	09:00:00	22	19			23.3	19.4
10	2007-10-07	09:00:00	12	11			12.2	9.4
10	2007-10-08	09:00:00	8	7			10.6	7.2
10	2007-10-09	09:00:00	8	3			12.8	5
10	2007-10-10	09:00:00	4	0			6.1	1.1
10	2007-10-11	09:00:00	6	2			7.8	2.2
10	2007-10-12	09:00:00	8	4			10	5.6
10	2007-10-13	09:00:00	9	7			10.6	7.2
10	2007-10-14	09:00:00	8	6			10	8.3
10	2007-10-15	09:00:00	6	6			8.9	7.8
10	2007-10-16	09:00:00	9	9			10.6	9.4
10	2007-10-17	09:00:00	9	8			11	10
10	2007-10-18	09:00:00	11	11			13.3	11.7
10	2007-10-19	09:00:00	8	6			9.4	5.6
10	2007-10-20	09:00:00	9	4			11.7	5.6
10	2007-10-21	09:00:00	7	6			10	4.4
10	2007-10-22	09:00:00	4	1			6.1	2.2
10	2007-10-23	09:00:00	6	2			8.9	1.7
10	2007-10-24	09:00:00	4	1			7.8	1.1
10	2007-10-25	09:00:00	7	-1			8.3	0
10	2007-10-26	09:00:00	5	1			5.6	0.6
10	2007-10-27	09:00:00	2	-2			6.1	-1.7
10	2007-10-28	09:00:00	2	-2			5.6	-1.7
10	2007-10-29	09:00:00	4	2			8.9	3.9
10	2007-10-30	09:00:00	S	S			12.8	6.7
10	2007-10-31	09:00:00	S	S			6.1	-2.2
11	2007-11-01	09:00:00	3	-4			5.6	-4.4
11	2007-11-02	09:00:00	6	-1			7.8	-0.6
11	2007-11-03	09:00:00	-1	-4			1.7	-3.9
11	2007-11-04	09:00:00	2	-1			6.7	-2.2
11	2007-11-05	09:00:00	2	-5			3.9	-5
11	2007-11-06	09:00:00	-3	-6			-2.8	-7.2
11	2007-11-07	09:00:00	-1	-7			2.8	-6.7
11	2007-11-08	09:00:00	-3	-4			0.6	-3.3
11	2007-11-09	09:00:00	-1	-3			1.1	-2.8
11	2007-11-10	09:00:00	3	-1			6.1	-0.6
11	2007-11-11	09:00:00	4	4			3.3	2.8
11	2007-11-12	09:00:00	4	-5			7.8	-5
11	2007-11-13	09:00:00	7	-3			7.2	-3.3
11	2007-11-14	09:00:00	4	-6			5.6	-7.2
11	2007-11-15	09:00:00	-5	-7			-1.7	-7.2
11	2007-11-16	09:00:00	-1	-6			2.8	-6.7
11	2007-11-17	09:00:00	0	-3			1.7	-3.3
11	2007-11-18	09:00:00	0	-1			2.2	-0.6
11	2007-11-19	09:00:00	2	2			3.3	1.7
11	2007-11-20	09:00:00	1	-4			1.7	-3.3
11	2007-11-21	09:00:00	-5	-10			-3.3	-9.4
11	2007-11-22	09:00:00	-9	-12			-7.2	-11.7
11	2007-11-23	09:00:00	-7	-9			-5.6	-11.1
11	2007-11-24	09:00:00	-4	-7			-1.1	-6.1
11	2007-11-25	09:00:00	-3	-6			-0.6	-6.7
11	2007-11-26	09:00:00	-8	-9			-3.9	-6.7
11	2007-11-27	09:00:00	-16	-19			-12.2	-19.4
11	2007-11-28	09:00:00	-8	-13			-5	-12.2
11	2007-11-29	09:00:00	-13	-17			-9.4	-16.7
11	2007-11-30	09:00:00	-16	-18			-13.9	-18.3
12	2007-12-01	09:00:00	-8	-9			-6.1	-8.3
12	2007-12-02	09:00:00	-12	-13			-10	-12.8
12	2007-12-03	09:00:00	-13	-14			-7.2	-11.1
12	2007-12-04	09:00:00	-8	-9			-6.1	-8.3
12	2007-12-05	09:00:00	-17	-18			-12.8	-15.6
12	2007-12-06	09:00:00	-6	-7			-4.4	-7.8
12	2007-12-07	09:00:00	-22	-22			-12.2	-14.4
12	2007-12-08	09:00:00	-16	-20			-12.8	-18.3
12	2007-12-09	09:00:00	-13	-16			-11.1	-15.6
12	2007-12-10	09:00:00	-13	-14			-10.6	-13.3
12	2007-12-11	09:00:00	-7	-9			-4.4	-8.3
12	2007-12-12	09:00:00	-14	-18			-14.4	-16.7
12	2007-12-13	09:00:00	-4	-8			-2.8	-8.3
12	2007-12-14	09:00:00	-18	-19			-16.1	-20
12	2007-12-15	09:00:00	-16	-17			-12.8	-16.7
12	2007-12-16	09:00:00	-16	-17			-12.8	-14.4
12	2007-12-17	09:00:00	-14	-15			-12.2	-15
12	2007-12-18	09:00:00	-14	-14			-8.3	-10.6
12	2007-12-19	09:00:00	-11	-11			-11.7	-13.3
12	2007-12-20	09:00:00	-11	-12			-8.3	-11.1
12	2007-12-21	09:00:00	-4	-6			0.6	-4.4
12	2007-12-22	09:00:00	-12	-16			-8.9	-15
12	2007-12-23	09:00:00	-16	-18			-14.4	-18.3
12	2007-12-24	09:00:00	-9	-10			-8.3	-9.4
12	2007-12-25	09:00:00	-4	-5			-3.9	-6.7
12	2007-12-26	09:00:00	-12	-12			-10.6	-12.2
12	2007-12-27	09:00:00	-10	-11			-6.7	-8.3
12	2007-12-28	09:00:00	-8	-8			-6.1	-8.3
12	2007-12-29	09:00:00	-9	-9			-6.1	-8.9
12	2007-12-30	09:00:00	-16	-16			-18.3	-20.6
12	2007-12-31	09:00:00	-13	-14			-10	-12.2
1	2008-01-01	09:00:00	-19	-22			-17.2	-21.7
1	2008-01-02	09:00:00	-23	-29			-19.4	-21.7
1	2008-01-03	09:00:00	-9	-13			-7.8	-13.3
1	2008-01-04	09:00:00	-11	-11			-5.6	-8.3
1	2008-01-05	09:00:00	-8	-8			-8.3	-10.6
1	2008-01-06	09:00:00	1	-2			3.3	-0.6
1	2008-01-07	09:00:00	-2	-5			-0.6	-3.3
1	2008-01-08	09:00:00	-8	-11			-3.9	-8.9
1	2008-01-09	09:00:00	-7	-8			-5	-8.3
1	2008-01-10	09:00:00	-7	-8			-3.9	-5
1	2008-01-11	09:00:00	-10	-11			-8.9	-11.7
1	2008-01-12	09:00:00	-9	-11			-7.2	-10.6
1	2008-01-13	09:00:00	-8	-9			-7.8	-10.6
1	2008-01-14	09:00:00	-22	-24			-17.2	-21.7
1	2008-01-15	09:00:00	-16	-17			-11.7	-13.9
1	2008-01-16	09:00:00	-9	-13			-6.7	-12.2
1	2008-01-17	09:00:00	-22	-24			-18.9	-22.8
1	2008-01-18	09:00:00	-21	-25			-16.1	-21.7
1	2008-01-19	09:00:00	-27	M			-23.9	-27.8
1	2008-01-20	09:00:00	-29	-29			-23.3	-26.7
1	2008-01-21	09:00:00	-16	-30			-13.9	-17.2
1	2008-01-22	09:00:00	-20	-27			-17.8	-22.8
1	2008-01-23	09:00:00	-18	-26			-15.6	-18.9
1	2008-01-24	09:00:00	-26	M			-23.9	-26.7
1	2008-01-25	09:00:00	-14	-16			-9.4	-13.3
1	2008-01-26	09:00:00	-13	-18			-10.6	-14.4
1	2008-01-27	09:00:00	-9	-13			-10	-11.7
1	2008-01-28	09:00:00	1	-2			3.3	-0.6
1	2008-01-29	09:00:00	-22	-26			-18.9	-24.4
1	2008-01-30	09:00:00	-24	-32			-21.7	-28.3
1	2008-01-31	09:00:00	-21	-27			-16.7	-21.1
2	2008-02-01	09:00:00	-11	-12			-8.9	-12.2
2	2008-02-02	09:00:00	-14	-16			-10.6	-13.3
2	2008-02-03	09:00:00	-8	-9			-5.6	-8.3
2	2008-02-04	09:00:00	-4	-5			-2.2	-3.9
2	2008-02-05	09:00:00	-11	-13			-7.8	-11.1
2	2008-02-06	09:00:00	-19	-20			-18.3	-21.1
2	2008-02-07	09:00:00	-11	-12			-10	-12.2
2	2008-02-08	09:00:00	-7	-8			-7.2	-9.4
2	2008-02-09	09:00:00	-13	-16			-11.1	-15
2	2008-02-10	09:00:00	-26	M			-22.8	-29.4
2	2008-02-11	09:00:00	-18	-31			-17.2	-20.6
2	2008-02-12	09:00:00	-16	M			-15.6	-18.3
2	2008-02-13	09:00:00	-10	-10			-9.4	-12.2
2	2008-02-14	09:00:00	-17	-20			-12.2	-16.1
2	2008-02-15	09:00:00	-20	-24			-17.8	-21.7
2	2008-02-16	09:00:00	-9	-11			-6.1	-10
2	2008-02-17	09:00:00	-2	-4			-1.1	-4.4
2	2008-02-18	09:00:00	-21	-25			-18.9	-22.8
2	2008-02-19	09:00:00	-18	-22			-16.7	-20
2	2008-02-20	09:00:00	-29	M			-27.2	-31.1
2	2008-02-21	09:00:00	-18	M			-15.6	-20
2	2008-02-22	09:00:00	-16	-18			-16.7	-18.9
2	2008-02-23	09:00:00	-11	-17			-12.2	-15
2	2008-02-24	09:00:00	-7	-8			-6.1	-8.9
2	2008-02-25	09:00:00	-6	-7			-1.1	-3.3
2	2008-02-26	09:00:00	-7	-9			-7.2	-11.1
2	2008-02-27	09:00:00	-8	-9			-5.6	-8.9
2	2008-02-28	09:00:00	-4	-6			-1.7	-6.7
2	2008-02-29	09:00:00	-1	-4			-0.6	-3.9
3	2008-03-01	09:00:00	-3	-7			-2.2	-6.1
3	2008-03-02	09:00:00	-2	-3			0.6	-1.7
3	2008-03-03	09:00:00	-14	-18			-11.7	-16.7
3	2008-03-04	09:00:00	-6	-10			-4.4	-8.9
3	2008-03-05	09:00:00	-13	-16			-10.6	-13.9
3	2008-03-06	09:00:00	-16	-16			-11.1	-15
3	2008-03-07	09:00:00	-24	-28			-20.6	-26.1
3	2008-03-08	09:00:00	-13	-17			-11.1	-15.6
3	2008-03-09	09:00:00	-11	-13			-8.9	-13.3
3	2008-03-10	09:00:00	-12	-13			-10.6	-13.3
3	2008-03-11	09:00:00	-1	-4			2.8	-2.8
3	2008-03-12	09:00:00	3	-2			3.9	-0.6
3	2008-03-13	09:00:00	3	-2			3.3	-2.2
3	2008-03-14	09:00:00	S	S			0.6	-3.9
3	2008-03-15	09:00:00	-7	-11			-2.8	-7.2
3	2008-03-16	09:00:00	-4	-8			-1.7	-6.1
3	2008-03-17	09:00:00	-1	-1			1.1	-0.6
3	2008-03-18	09:00:00	-2	-2			0.6	-0.6
3	2008-03-19	09:00:00	2	-2			2.2	-1.1
3	2008-03-20	09:00:00	1	-1			2.2	0.6
3	2008-03-21	09:00:00	-1	-2			1.7	-0.6
3	2008-03-22	09:00:00	-1	-3			0	-1.7
3	2008-03-23	09:00:00	-6	-8			-3.3	-7.2
3	2008-03-24	09:00:00	-3	-7			-1.1	-6.7
3	2008-03-25	09:00:00	3	-6			5.6	-6.7
3	2008-03-26	09:00:00	-1	-3			3.3	-1.7
3	2008-03-27	09:00:00	-3	-5			-1.7	-3.9
3	2008-03-28	09:00:00	-3	-8			-1.1	-6.1
3	2008-03-29	09:00:00	2	-3			3.3	-2.8
3	2008-03-30	09:00:00	1	-4			2.8	-3.3
3	2008-03-31	09:00:00	-1	-2			0	-1.1
4	2008-04-01	09:00:00	-4	-7			-1.1	-5.6
4	2008-04-02	09:00:00	0	-4			1	-3
4	2008-04-03	09:00:00	4	0			2.8	0
4	2008-04-04	09:00:00	6	1			7.2	1.1
4	2008-04-05	09:00:00	4	-1			8.9	0
4	2008-04-06	09:00:00	3	2			2.8	0
4	2008-04-07	09:00:00	-1	-7			1.1	-7.2
4	2008-04-08	09:00:00	4	-4			5	-3.3
4	2008-04-09	09:00:00	0	0			1.7	0.6
4	2008-04-10	09:00:00	1	-1			2.2	0.6
4	2008-04-11	09:00:00	-1	-2			1.1	-2.2
4	2008-04-12	09:00:00	-3	-4			-1.1	-5.6
4	2008-04-13	09:00:00	-1	-6			1.1	-6.7
4	2008-04-14	09:00:00	2	-5			3.9	-3.9
4	2008-04-15	09:00:00	8	-1			10.6	-1.1
4	2008-04-16	09:00:00	8	3			10.6	3.9
4	2008-04-17	09:00:00	6	-2			8.9	-1.1
4	2008-04-18	09:00:00	8	0			7.8	0.6
4	2008-04-19	09:00:00	7	-1			9.4	-2.2
4	2008-04-20	09:00:00	6	5			7.8	7.2
4	2008-04-21	09:00:00	7	4			7.8	2.2
4	2008-04-22	09:00:00	6	-2			7.8	-2.2
4	2008-04-23	09:00:00	12	-1			17.2	-0.6
4	2008-04-24	09:00:00	13	11			15	12.8
4	2008-04-25	09:00:00	-2	-3			0	-1.7
4	2008-04-26	09:00:00	-2	-8			0	-6.7
4	2008-04-27	09:00:00	0	-4			2.8	-2.8
4	2008-04-28	09:00:00	0	-8			3.9	-7.8
4	2008-04-29	09:00:00	4	-4			6.7	-3.3
4	2008-04-30	09:00:00	10	-1			12.2	0.6
5	2008-05-01	09:00:00	12	7			S	S
5	2008-05-02	09:00:00	6	5			8.9	8.3
5	2008-05-03	09:00:00	4	-5			5.6	-3.3
5	2008-05-04	09:00:00	11	-1			11.7	1.7
5	2008-05-05	09:00:00	11	3			15.6	4.4
5	2008-05-06	09:00:00	17	8			18.3	10.6
5	2008-05-07	09:00:00	11	3			12.8	7.2
5	2008-05-08	09:00:00	8	-3			11.7	1.1
5	2008-05-09	09:00:00	7	3			7	5
5	2008-05-10	09:00:00	8	8			10.6	8.9
5	2008-05-11	09:00:00	6	-2			8.9	-2.8
5	2008-05-12	09:00:00	13	3			14.4	3.3
5	2008-05-13	09:00:00	8	6			10	8.3
5	2008-05-14	09:00:00	9	1			11.7	1.7
5	2008-05-15	09:00:00	14	7			16.1	6.1
5	2008-05-16	09:00:00	17	4			18.9	5.6
5	2008-05-17	09:00:00	18	6			20.6	6.7
5	2008-05-18	09:00:00	11	-1			14.4	-1.7
5	2008-05-19	09:00:00	14	3			16.1	1.7
5	2008-05-20	09:00:00	9	5			12.2	3.9
5	2008-05-21	09:00:00	12	-1			13.9	0
5	2008-05-22	09:00:00	16	2			11.7	6.1
5	2008-05-23	09:00:00	14	7			14.4	8.9
5	2008-05-24	09:00:00	12	7			12.2	7.8
5	2008-05-25	09:00:00	20	18			22.2	18.3
5	2008-05-26	09:00:00	9	4			12.2	5.6
5	2008-05-27	09:00:00	6	-1			7.8	0.6
5	2008-05-28	09:00:00	11	4			11.7	3.9
5	2008-05-29	09:00:00	14	13			16.1	14.4
5	2008-05-30	09:00:00	17	13			17.2	15
5	2008-05-31	09:00:00	19	11			21.1	11.1
6	2008-06-01	09:00:00	21	9			23.9	10
6	2008-06-02	09:00:00	18	14			18.9	14.4
6	2008-06-03	09:00:00	14	13			17.8	15
6	2008-06-04	09:00:00	16	14			17.2	15.6
6	2008-06-05	09:00:00	16	14			20	16.7
6	2008-06-06	09:00:00	13	9			15	10
6	2008-06-07	09:00:00	18	12			21.1	15
6	2008-06-08	09:00:00	17	11			19.4	13.3
6	2008-06-09	09:00:00	15	8			18.3	7.8
6	2008-06-10	09:00:00	16	8			17.8	10.6
6	2008-06-11	09:00:00	18	16			22.2	12.8
6	2008-06-12	09:00:00	17	9			18.3	7.8
6	2008-06-13	09:00:00	15	7			18.3	6.1
6	2008-06-14	09:00:00	19	9			22.2	10
6	2008-06-15	09:00:00	17	8			18.9	7.8
6	2008-06-16	09:00:00	16	6			18.3	5.6
6	2008-06-17	09:00:00	20	8			22.2	7.8
6	2008-06-18	09:00:00	22	11			24.4	7.8
6	2008-06-19	09:00:00	22	9			23.9	13.9
6	2008-06-20	09:00:00	22	14			26.1	11.7
6	2008-06-21	09:00:00	21	12			24.4	11.1
6	2008-06-22	09:00:00	21	7			23.3	7.8
6	2008-06-23	09:00:00	21	12			22.8	10.6
6	2008-06-24	09:00:00	22	13			24.4	13.3
6	2008-06-25	09:00:00	21	16			22.8	16.1
6	2008-06-26	09:00:00	22	16			20.6	15.6
6	2008-06-27	09:00:00	22	17			22.8	17.8
6	2008-06-28	09:00:00	14	9			18.3	10
6	2008-06-29	09:00:00	18	13			20	13.3
6	2008-06-30	09:00:00	21	14			23.9	13.3
7	2008-07-01	09:00:00	25	13	47.284		26.7	12.2	40.5695
7	2008-07-02	09:00:00	25	9	36.2579		23.3	10.6	44.6955
7	2008-07-03	09:00:00	25	8	33.8844		18.9	8.3	50.1735
7	2008-07-04	09:00:00	25	12	44.2818		22.8	10	44.2598
7	2008-07-05	09:00:00	25	16	57.3933		23.9	15.6	59.7523
7	2008-07-06	09:00:00	25	21	78.4976		27.2	20.6	67.2457
7	2008-07-07	09:00:00	25	18	65.1455		22.2	18.9	81.5902
7	2008-07-08	09:00:00	25	14	50.464		26.7	12.2	40.5695
7	2008-07-09	09:00:00	25	14	50.464		25	15.6	55.9441
7	2008-07-10	09:00:00	25	18	65.1455		27.2	18.3	58.2859
7	2008-07-11	09:00:00	25	21	78.4976		28.3	21.1	65.0301
7	2008-07-12	09:00:00	25	7	31.6492		22.2	7.8	39.5694
7	2008-07-13	09:00:00	25	10	38.7768		22.2	10	45.9028
7	2008-07-14	09:00:00	25	11	41.4488		26.1	13.3	45.1701
7	2008-07-15	09:00:00	25	18	65.1455		26.7	16.7	54.2593
7	2008-07-16	09:00:00	25	16	57.3933		25	14.4	51.7877
7	2008-07-17	09:00:00	25	18	65.1455		21.7	19.4	86.7792
7	2008-07-18	09:00:00	25	16	57.3933		23.3	17.8	71.2394
7	2008-07-19	09:00:00	25	17	61.1616		21.7	19.4	86.7792
7	2008-07-20	09:00:00	25	19	69.3555		23.9	20.6	81.8026
7	2008-07-21	09:00:00	25	16	57.3933		23.9	17.2	66.1572
7	2008-07-22	09:00:00	25	16	57.3933		25	15.6	55.9441
7	2008-07-23	09:00:00	25	16	57.3933		22.8	17.2	70.6991
7	2008-07-24	09:00:00	25	18	65.1455		22.2	18.9	81.5902
7	2008-07-25	09:00:00	25	18	65.1455		24.4	16.1	59.8692
7	2008-07-26	09:00:00	25	13	47.284		20.6	13.9	65.4633
7	2008-07-27	09:00:00	25	16	57.3933		22.2	20	87.3652
7	2008-07-28	09:00:00	25	20	73.8025		25.6	20	71.2147
7	2008-07-29	09:00:00	25	18	65.1455		28.3	19.4	58.5453
7	2008-07-30	09:00:00	25	16	57.3933		26.1	20.6	71.7464
7	2008-07-31	09:00:00	25	13	47.284		22.2	15.6	66.225
8	2008-08-01	09:00:00	25	17	61.1616		24.4	18.9	71.4401
8	2008-08-02	09:00:00	25	13	47.284		23.3	13.3	53.3971
8	2008-08-03	09:00:00	25	19	69.3555		25	21.1	78.9813
8	2008-08-04	09:00:00	25	19	69.3555		23.3	19.4	78.7412
8	2008-08-05	09:00:00	25	17	61.1616		23.9	17.8	68.7101
8	2008-08-06	09:00:00	25	17	61.1616		20	17.8	87.1664
8	2008-08-07	09:00:00	25	14	50.464		23.3	16.1	63.9635
8	2008-08-08	09:00:00	25	13	47.284		22.8	14.4	59.1104
8	2008-08-09	09:00:00	25	16	57.3933		24.4	16.7	62.1995
8	2008-08-10	09:00:00	25	16	57.3933		20	16.1	78.2639
8	2008-08-11	09:00:00	25	17	61.1616		20.6	17.2	80.8742
8	2008-08-12	09:00:00	25	17	61.1616		22.2	16.1	68.3754
8	2008-08-13	09:00:00	25	16	57.3933		24.4	17.2	64.2019
8	2008-08-14	09:00:00	25	17	61.1616		21.7	16.1	70.4931
8	2008-08-15	09:00:00	25	16	57.3933		18.3	15	81.0894
8	2008-08-16	09:00:00	25	17	61.1616		22.2	16.7	71.0367
8	2008-08-17	09:00:00	25	15	53.8306		21.7	15.6	68.276
8	2008-08-18	09:00:00	25	16	57.3933		22.8	16.7	68.4941
8	2008-08-19	09:00:00	25	S	#VALUE!		24.4	17.2	64.2019
8	2008-08-20	09:00:00	25	14	50.464		23.3	14.4	57.3491
8	2008-08-21	09:00:00	25	16	57.3933		22.2	16.7	71.0367
8	2008-08-22	09:00:00	25	18	65.1455		24.4	18.9	71.4401
8	2008-08-23	09:00:00	25	8	33.8844		17.2	10	62.6031
8	2008-08-24	09:00:00	25	11	41.4488		20	11.1	56.5357
8	2008-08-25	09:00:00	25	11	41.4488		20.6	10.6	52.6983
8	2008-08-26	09:00:00	25	13	47.284		19.4	13.9	70.512
8	2008-08-27	09:00:00	25	9	36.2579		20	15.6	75.8024
8	2008-08-28	09:00:00	25	15	53.8306		20.6	17.2	80.8742
8	2008-08-29	09:00:00	25	9	36.2579		21.7	8.3	42.2046
8	2008-08-30	09:00:00	25	13	47.284		22.8	13.3	55.037
8	2008-08-31	09:00:00	25	16	57.3933		23.3	16.7	66.4532
9	2008-09-01	09:00:00	25	S	#VALUE!		25.6	19.4	68.6121
9	2008-09-02	09:00:00	25	10	38.7768		15	11.1	77.5112
9	2008-09-03	09:00:00	25	6	29.5453		13.3	7.2	66.5414
9	2008-09-04	09:00:00	25	7	31.6492		14.4	7.8	64.5453
9	2008-09-05	09:00:00	25	8	33.8844		13.9	8.9	71.8304
9	2008-09-06	09:00:00	25	8	33.8844		15	9.4	69.194
9	2008-09-07	09:00:00	25	9	36.2579		13.3	11.1	86.5319
9	2008-09-08	09:00:00	25	6	29.5453		13.9	8.9	71.8304
9	2008-09-09	09:00:00	25	7	31.6492		14.4	8.3	66.7757
9	2008-09-10	09:00:00	25	9	36.2579		16.1	10.6	69.8765
9	2008-09-11	09:00:00	25	16	57.3933		19	16	82.7523
9	2008-09-12	09:00:00	25	11	41.4488		16.7	12.2	74.7697
9	2008-09-13	09:00:00	25	12	44.2818		16.1	14.4	89.6591
9	2008-09-14	09:00:00	25	6	29.5453		10.6	7.2	79.4961
9	2008-09-15	09:00:00	25	7	31.6492		13.9	7.2	63.9948
9	2008-09-16	09:00:00	25	8	33.8844		18.3	10	58.4126
9	2008-09-17	09:00:00	25	10	38.7768		17.2	11.7	70.0904
9	2008-09-18	09:00:00	25	11	41.4488		20.6	11.7	56.685
9	2008-09-19	09:00:00	25	12	44.2818		19.4	12.8	65.6345
9	2008-09-20	09:00:00	25	13	47.284		20	13.3	65.3351
9	2008-09-21	09:00:00	25	13	47.284		20.6	13.9	65.4633
9	2008-09-22	09:00:00	25	16	57.3933		21.1	16.1	73.1322
9	2008-09-23	09:00:00	25	16	57.3933		19.4	15.6	78.6778
9	2008-09-24	09:00:00	25	6	29.5453		15.6	6.7	55.4206
9	2008-09-25	09:00:00	25	14	50.464		20	16.7	81.3101
9	2008-09-26	09:00:00	25	14	50.464		22.8	14.4	59.1104
9	2008-09-27	09:00:00	25	9	36.2579		13.3	11.1	86.5319
9	2008-09-28	09:00:00	25	9	36.2579		11.1	10	92.9348
9	2008-09-29	09:00:00	25	6	29.5453		13.9	6.1	59.3364
9	2008-09-30	09:00:00	25	5	27.5659		12.2	7.2	71.5103
10	2008-10-01	09:00:00	9	6			10.6	5
10	2008-10-02	09:00:00	9	6			12.2	6.1
10	2008-10-03	09:00:00	10	6			12.8	7.8
10	2008-10-04	09:00:00	12	4			12.8	5
10	2008-10-05	09:00:00	14	12			15.6	12.8
10	2008-10-06	09:00:00	17	15			18.9	15.6
10	2008-10-07	09:00:00	11	7			12.2	8.9
10	2008-10-08	09:00:00	11	4			13.9	3.3
10	2008-10-09	09:00:00	7	2			10	1.7
10	2008-10-10	09:00:00	7	2			13.3	3.9
10	2008-10-11	09:00:00	9	7			16.1	11.7
10	2008-10-12	09:00:00	17	14			18.9	15
10	2008-10-13	09:00:00	4	1			5	3.9
10	2008-10-14	09:00:00	6	1			6.1	1.1
10	2008-10-15	09:00:00	6	-1			7.8	2.2
10	2008-10-16	09:00:00	3	-1			5	-0.6
10	2008-10-17	09:00:00	7	4			7.2	5
10	2008-10-18	09:00:00	6	4			5.6	4.4
10	2008-10-19	09:00:00	9	7			12.2	8.3
10	2008-10-20	09:00:00	6	1			8.3	2.8
10	2008-10-21	09:00:00	4	-3			5.6	-2.2
10	2008-10-22	09:00:00	4	3			5.6	4.4
10	2008-10-23	09:00:00	3	1			5.6	2.2
10	2008-10-24	09:00:00	4	3			5	2.2
10	2008-10-25	09:00:00	5	2			6.1	1.1
10	2008-10-26	09:00:00	2	-11			4.4	-11.7
10	2008-10-27	09:00:00	-3	-8			-1.1	-8.3
10	2008-10-28	09:00:00	-1	-8			1.7	-7.8
10	2008-10-29	09:00:00	3	-2			3.9	-1.7
10	2008-10-30	09:00:00	8	3			11.7	3.9
10	2008-10-31	09:00:00	7	2			7.2	2.8
11	2008-11-01	09:00:00	5	-2			5.6	-1.1
11	2008-11-02	09:00:00	7	4			11.7	5.6
11	2008-11-03	09:00:00	13	9			15	10
11	2008-11-04	09:00:00	9	7			13.3	8.9
11	2008-11-05	09:00:00	14	10			16.1	10.6
11	2008-11-06	09:00:00	4	1			5	0.6
11	2008-11-07	09:00:00	0	-2			0	-1.1
11	2008-11-08	09:00:00	-4	-6			-1.7	-4.4
11	2008-11-09	09:00:00	-7	-10			-6.1	-8.9
11	2008-11-10	09:00:00	-11	-11			-6.1	-8.3
11	2008-11-11	09:00:00	-2	-3			0	-1.1
11	2008-11-12	09:00:00	-1	-2			1.1	-0.6
11	2008-11-13	09:00:00	3	1			5	2.8
11	2008-11-14	09:00:00	2	-1			4.4	0.6
11	2008-11-15	09:00:00	-3	-6			-0.6	-5.6
11	2008-11-16	09:00:00	2	-2			2.8	-1.1
11	2008-11-17	09:00:00	-2	-5			-0.6	-5.6
11	2008-11-18	09:00:00	-6	-8			-3.9	-8.3
11	2008-11-19	09:00:00	-2	-4			2.8	-1.1
11	2008-11-20	09:00:00	-7	-11			-5.6	-10
11	2008-11-21	09:00:00	-14	-16			-11.1	-14.4
11	2008-11-22	09:00:00	-3	-4			0	-2.2
11	2008-11-23	09:00:00	-3	-5			-2.2	-5
11	2008-11-24	09:00:00	-4	-7			-1.1	-5
11	2008-11-25	09:00:00	-6	-8			-3.3	-6.1
11	2008-11-26	09:00:00	-6	-7			-1.1	-4.4
11	2008-11-27	09:00:00	-2	-4			0	-3.3
11	2008-11-28	09:00:00	-7	-11			-3.9	-7.8
11	2008-11-29	09:00:00	-5	-7			-2.2	-4.4
11	2008-11-30	09:00:00	-4	-6			-2.2	-5.6
12	2008-12-01	09:00:00	-8	-11			-5.6	-9.4
12	2008-12-02	09:00:00	-4	-7			-1.7	-6.1
12	2008-12-03	09:00:00	-14	-16			-10.6	-14.4
12	2008-12-04	09:00:00	-16	-19			-13.9	-18.3
12	2008-12-05	09:00:00	-14	-16			-11.7	-15.6
12	2008-12-06	09:00:00	-12	-16			-9.4	-15
12	2008-12-07	09:00:00	-12	-16			-8.9	-12.8
12	2008-12-08	09:00:00	-3	-6			-3.9	-7.2
12	2008-12-09	09:00:00	-16	-18			-12.8	-17.2
12	2008-12-10	09:00:00	-9	-12			-6.1	-11.7
12	2008-12-11	09:00:00	-8	-8			-3.3	-5
12	2008-12-12	09:00:00	-10	-11			-5.6	-7.8
12	2008-12-13	09:00:00	-5	-6			-2.8	-5
12	2008-12-14	09:00:00	-19	-22			-17.8	-21.7
12	2008-12-15	09:00:00	-27	-28			-23.3	-28.9
12	2008-12-16	09:00:00	-20	-28			-17.8	-21.7
12	2008-12-17	09:00:00	-23	-23			-20.6	-22.8
12	2008-12-18	09:00:00	-24	-26			-19.4	-22.8
12	2008-12-19	09:00:00	-15	-19			-11.7	-15
12	2008-12-20	09:00:00	-16	M			-14.4	-17.8
12	2008-12-21	09:00:00	-24	-29			-22.2	-26.7
12	2008-12-22	09:00:00	-26	-29			-21.7	-25
12	2008-12-23	09:00:00	-10	-12			-7.8	-12.2
12	2008-12-24	09:00:00	-24	-33			-21.1	-24.4
12	2008-12-25	09:00:00	-14	-29			-11.1	-13.9
12	2008-12-26	09:00:00	-2	-2			1.1	0.6
12	2008-12-27	09:00:00	-12	-16			-11.7	-15.6
12	2008-12-28	09:00:00	-14	-26			-9.4	-12.8
12	2008-12-29	09:00:00	-6	-6			-0.6	-3.9
12	2008-12-30	09:00:00	-8	-13			-3.9	-6.1
12	2008-12-31	09:00:00	-24	M			-20.6	-23.9
1	2009-01-01	09:00:00	-6	-9			-5	-8.9
1	2009-01-02	09:00:00	-16	-20			-12.2	-17.2
1	2009-01-03	09:00:00	-6	-7			-3.9	-5.6
1	2009-01-04	09:00:00	-24	M			-20.6	-25
1	2009-01-05	09:00:00	-18	-22			-10	-15.6
1	2009-01-06	09:00:00	-13	-16			-8.9	-12.8
1	2009-01-07	09:00:00	-17	-23			-12.8	-16.1
1	2009-01-08	09:00:00	-18	M			-14.4	-18.9
1	2009-01-09	09:00:00	-9	-11			-6.7	-8.9
1	2009-01-10	09:00:00	-19	-21			-17.2	-20.6
1	2009-01-11	09:00:00	-6	-8			-4.4	-7.2
1	2009-01-12	09:00:00	-2	-4			-1.1	-4.4
1	2009-01-13	09:00:00	-24	-25			-20	-23.9
1	2009-01-14	09:00:00	-23	-27			-20	-24.4
1	2009-01-15	09:00:00	-32	M			-30	-33.9
1	2009-01-16	09:00:00	-22	-26			-16.1	-18.9
1	2009-01-17	09:00:00	-3	-5			-1.1	-4.4
1	2009-01-18	09:00:00	-6	-8			-3.9	-6.7
1	2009-01-19	09:00:00	-7	-8			-6.7	-9.4
1	2009-01-20	09:00:00	-11	-13			-7.2	-9.4
1	2009-01-21	09:00:00	-8	-11			-6.1	-9.4
1	2009-01-22	09:00:00	-15	-16			-7.2	-9.4
1	2009-01-23	09:00:00	-16	-20			-10	-14.4
1	2009-01-24	09:00:00	-25	-27			-21.1	-25
1	2009-01-25	09:00:00	-21	-24			-17.2	-23.3
1	2009-01-26	09:00:00	-16	-19			-14.4	-18.3
1	2009-01-27	09:00:00	-20	-23			-15.6	-17.8
1	2009-01-28	09:00:00	-17	-19			-15.6	-18.9
1	2009-01-29	09:00:00	-11	-13			-6.7	-10.6
1	2009-01-30	09:00:00	-12	-13			-7.2	-10.6
1	2009-01-31	09:00:00	2	-4			-1.1	-4.4
2	2009-02-01	09:00:00	-5	-9			-1.7	-6.1
2	2009-02-02	09:00:00	-14	-17			-8.3	-12.8
2	2009-02-03	09:00:00	-24	-26			-19.4	-23.9
2	2009-02-04	09:00:00	-19	-21			-14.4	-18.9
2	2009-02-05	09:00:00	-9	-12			-4.4	-8.9
2	2009-02-06	09:00:00	-2	-7			0.6	-5
2	2009-02-07	09:00:00	-2	-5			2.2	-1.7
2	2009-02-08	09:00:00	-9	-11			-5.6	-7.8
2	2009-02-09	09:00:00	3	1			4.4	3.3
2	2009-02-10	09:00:00	1	-1			3.9	2.2
2	2009-02-11	09:00:00	-1	-4			0.6	-3.3
2	2009-02-12	09:00:00	-4	-9			-3.3	-8.3
2	2009-02-13	09:00:00	-12	-14			-7.2	-11.1
2	2009-02-14	09:00:00	-11	-13			-8.9	-12.2
2	2009-02-15	09:00:00	-12	-16			-8.9	-14.4
2	2009-02-16	09:00:00	-7	-11			-4.4	-10
2	2009-02-17	09:00:00	-4	-6			-1.7	-4.4
2	2009-02-18	09:00:00	-11	-14			-8	-13
2	2009-02-19	09:00:00	-16	-19			-14.4	-18.3
2	2009-02-20	09:00:00	-9	-11			-6.1	-10
2	2009-02-21	09:00:00	-15	-18			-12.2	-16.1
2	2009-02-22	09:00:00	-16	-18			-13.3	-17.2
2	2009-02-23	09:00:00	-13	-16			-10.6	-14.4
2	2009-02-24	09:00:00	-4	-8			1.1	-6.1
2	2009-02-25	09:00:00	-3	-5			-0.6	-4.4
2	2009-02-26	09:00:00	-11	-13			-5	-7.2
2	2009-02-27	09:00:00	-20	-24			-17.8	-21.7
2	2009-02-28	09:00:00	-18	-22			-16.1	-21.7
3	2009-03-01	09:00:00	-21	-23			-17.8	-22.2
3	2009-03-02	09:00:00	-11	-14			-8.9	-13.3
3	2009-03-03	09:00:00	-5	-9			-4.4	-9.4
3	2009-03-04	09:00:00	-3	-7			-1.1	-5
3	2009-03-05	09:00:00	0	-2			0	-0.6
3	2009-03-06	09:00:00	1	-1			2.2	-0.6
3	2009-03-07	09:00:00	-8	-13			-5	-8.9
3	2009-03-08	09:00:00	-4	-9			-2.8	-5
3	2009-03-09	09:00:00	-1	-2			0	-1.1
3	2009-03-10	09:00:00	-12	-16			-9.4	-12.2
3	2009-03-11	09:00:00	-21	-24			-18.3	-23.9
3	2009-03-12	09:00:00	-17	-20			-13.9	-18.9
3	2009-03-13	09:00:00	-7	-9			-4.4	-7.8
3	2009-03-14	09:00:00	2	-5			2.8	-3.9
3	2009-03-15	09:00:00	5	-1			6.1	0
3	2009-03-16	09:00:00	6	1			7.2	1.7
3	2009-03-17	09:00:00	4	-1			7.2	0
3	2009-03-18	09:00:00	3	-1			6.7	-1.7
3	2009-03-19	09:00:00	-3	-7			-1.1	-5
3	2009-03-20	09:00:00	6	-3			7.8	-2.8
3	2009-03-21	09:00:00	5	1			6.1	1.1
3	2009-03-22	09:00:00	11	7			10	7.2
3	2009-03-23	09:00:00	12	9			12.2	9.4
3	2009-03-24	09:00:00	1	-4			1.7	-3.3
3	2009-03-25	09:00:00	-3	-7			-2.8	-4.4
3	2009-03-26	09:00:00	-4	-9			-2.8	-7.2
3	2009-03-27	09:00:00	-8	-13			-6.7	-12.2
3	2009-03-28	09:00:00	-8	-11			-6.1	-8.9
3	2009-03-29	09:00:00	-1	-9			0	-6.7
3	2009-03-30	09:00:00	2	-6			4.4	-4.4
3	2009-03-31	09:00:00	-1	-4			2.8	1.1
4	2009-04-01	09:00:00	-3	-6			-1.7	-5.6
4	2009-04-02	09:00:00	-1	-7			1.1	-5
4	2009-04-03	09:00:00	1	-6			2.8	-3.9
4	2009-04-04	09:00:00	0	-5			2.2	-2.8
4	2009-04-05	09:00:00	-3	-7			-2.2	-5
4	2009-04-06	09:00:00	-2	-9			-2.8	-8.3
4	2009-04-07	09:00:00	-1	-6			-1.1	-6.1
4	2009-04-08	09:00:00	4	-1			3.9	0
4	2009-04-09	09:00:00	2	-2			2.8	-0.6
4	2009-04-10	09:00:00	2	-5			3.3	-2.8
4	2009-04-11	09:00:00	7	-6			6.7	-3.3
4	2009-04-12	09:00:00	8	-2			8.9	0.6
4	2009-04-13	09:00:00	8	-2			8.9	-0.6
4	2009-04-14	09:00:00	8	-2			10	-3.3
4	2009-04-15	09:00:00	12	1			12.8	1.7
4	2009-04-16	09:00:00	12	2			12.2	2.2
4	2009-04-17	09:00:00	14	5			14.4	7.2
4	2009-04-18	09:00:00	7	2			10.6	5.6
4	2009-04-19	09:00:00	3	0			5.6	3.3
4	2009-04-20	09:00:00	4	-3			5.6	0
4	2009-04-21	09:00:00	7	0			7.8	0.6
4	2009-04-22	09:00:00	11	-2			12.8	2.2
4	2009-04-23	09:00:00	17	7			21.7	8.9
4	2009-04-24	09:00:00	8	1			10.6	2.8
4	2009-04-25	09:00:00	3	-2			3.3	0.6
4	2009-04-26	09:00:00	7	4			8.3	6.7
4	2009-04-27	09:00:00	3	-2			5.6	0.6
4	2009-04-28	09:00:00	8	-1			8.9	1.1
4	2009-04-29	09:00:00	10	7			10	8.9
4	2009-04-30	09:00:00	7	1			9.4	3.3
5	2009-05-01	09:00:00	8	-2			9.4	1.1
5	2009-05-02	09:00:00	11	-1			12.8	-1.7
5	2009-05-03	09:00:00	14	0			15	1.1
5	2009-05-04	09:00:00	13	1			15.6	1.7
5	2009-05-05	09:00:00	14	11			14.4	11.7
5	2009-05-06	09:00:00	16	11			16.1	13.9
5	2009-05-07	09:00:00	15	5			13.9	10
5	2009-05-08	09:00:00	12	3			13.3	6.1
5	2009-05-09	09:00:00	8	1			8.3	3.3
5	2009-05-10	09:00:00	6	-1			8.3	2.8
5	2009-05-11	09:00:00	13	2			13.9	2.8
5	2009-05-12	09:00:00	14	7			16.1	8.9
5	2009-05-13	09:00:00	14	7			17.2	9.4
5	2009-05-14	09:00:00	7	1			7.8	2.2
5	2009-05-15	09:00:00	18	9			18.3	11.7
5	2009-05-16	09:00:00	5	-4			7.8	-2.2
5	2009-05-17	09:00:00	9	4			10	1.7
5	2009-05-18	09:00:00	17	7			17.8	7.8
5	2009-05-19	09:00:00	17	9			23.9	15
5	2009-05-20	09:00:00	22	8			22.8	10.6
5	2009-05-21	09:00:00	12	6			14.4	6.1
5	2009-05-22	09:00:00	14	3			14.4	10
5	2009-05-23	09:00:00	12	6			12.8	10.6
5	2009-05-24	09:00:00	16	2			17.8	3.9
5	2009-05-25	09:00:00	20	11			20.6	12.8
5	2009-05-26	09:00:00	12	8			13.9	11.1
5	2009-05-27	09:00:00	11	7			11.1	10
5	2009-05-28	09:00:00	14	12			16.1	12.2
5	2009-05-29	09:00:00	17	6			18.9	6.7
5	2009-05-30	09:00:00	16	3			18.9	3.9
5	2009-05-31	09:00:00	18	7			14.4	6.1
6	2009-06-01	09:00:00	17	8			18.9	10.6
6	2009-06-02	09:00:00	13	4			20	7.8
6	2009-06-03	09:00:00	14	1			15	3.9
6	2009-06-04	09:00:00	14	7			16.7	8.3
6	2009-06-05	09:00:00	16	7			20.6	9.4
6	2009-06-06	09:00:00	8	4			10	8.3
6	2009-06-07	09:00:00	9	6			11.1	9.4
6	2009-06-08	09:00:00	11	7			12.8	9.4
6	2009-06-09	09:00:00	12	8			13.3	10
6	2009-06-10	09:00:00	11	7			12.2	10
6	2009-06-11	09:00:00	16	6			17.8	8.9
6	2009-06-12	09:00:00	13	8			13.9	11.7
6	2009-06-13	09:00:00	16	13			17.8	12.8
6	2009-06-14	09:00:00	20	13			20.6	15
6	2009-06-15	09:00:00	17	13			17.2	15
6	2009-06-16	09:00:00	18	15			18.3	17.2
6	2009-06-17	09:00:00	20	17			23.3	19.4
6	2009-06-18	09:00:00	22	16			23.3	17.8
6	2009-06-19	09:00:00	21	16			21.7	17.2
6	2009-06-20	09:00:00	24	13			24.4	15
6	2009-06-21	09:00:00	19	16			21.7	21.1
6	2009-06-22	09:00:00	25	19			27.2	19.4
6	2009-06-23	09:00:00	24	19			22.2	18.3
6	2009-06-24	09:00:00	22	17			23.9	18.9
6	2009-06-25	09:00:00	24	19			26.1	20.6
6	2009-06-26	09:00:00	25	18			26.7	21.7
6	2009-06-27	09:00:00	20	15			20	17.2
6	2009-06-28	09:00:00	19	9			21.1	11.7
6	2009-06-29	09:00:00	21	12			22.8	13.3
6	2009-06-30	09:00:00	18	10			18.9	12.2
7	2009-07-01	09:00:00	25	13	47.284		20.6	15.6	73.0445
7	2009-07-02	09:00:00	25	14	50.464		22.8	13.9	57.2271
7	2009-07-03	09:00:00	25	15	53.8306		19.4	17.8	90.4728
7	2009-07-04	09:00:00	25	16	57.3933		17.2	16.1	93.2515
7	2009-07-05	09:00:00	25	14	50.464		23.9	15.6	59.7523
7	2009-07-06	09:00:00	25	17	61.1616		24.4	17.8	66.6793
7	2009-07-07	09:00:00	25	16	57.3933		23.9	17.8	68.7101
7	2009-07-08	09:00:00	25	14	50.464		20	17.2	83.9277
7	2009-07-09	09:00:00	25	17	61.1616		19.4	17.8	90.4728
7	2009-07-10	09:00:00	25	17	61.1616		23.3	19.4	78.7412
7	2009-07-11	09:00:00	25	12	44.2818		20.6	13.9	65.4633
7	2009-07-12	09:00:00	25	17	61.1616		19.4	17.8	90.4728
7	2009-07-13	09:00:00	25	13	47.284		22.8	18.9	78.6698
7	2009-07-14	09:00:00	25	18	65.1455		23.3	20.6	84.8139
7	2009-07-15	09:00:00	25	9	36.2579		20.6	11.7	56.685
7	2009-07-16	09:00:00	25	8	33.8844		17.8	11.1	64.8595
7	2009-07-17	09:00:00	25	8	33.8844		18.3	7.8	50.3531
7	2009-07-18	09:00:00	25	9	36.2579		19.4	11.1	58.6802
7	2009-07-19	09:00:00	25	11	41.4488		19.4	10	54.5344
7	2009-07-20	09:00:00	25	14	50.464		20	15.6	75.8024
7	2009-07-21	09:00:00	25	15	53.8306		19	16	82.7523
7	2009-07-22	09:00:00	25	13	47.284		22.8	14.4	59.1104
7	2009-07-23	09:00:00	25	13	47.284		23.3	15	59.6114
7	2009-07-24	09:00:00	25	18	65.1455		24.4	19.4	73.7009
7	2009-07-25	09:00:00	25	13	47.284		23.3	15	59.6114
7	2009-07-26	09:00:00	25	14	50.464		23.3	15	59.6114
7	2009-07-27	09:00:00	25	17	61.1616		24.4	18.9	71.4401
7	2009-07-28	09:00:00	25	11	41.4488		21.7	11.7	52.9845
7	2009-07-29	09:00:00	25	11	41.4488		21.1	11.7	54.9681
7	2009-07-30	09:00:00	25	12	44.2818		16.7	12.8	77.7712
7	2009-07-31	09:00:00	25	13	47.284		20	12.8	63.2358
8	2009-08-01	09:00:00	25	10	38.7768		16.7	11.1	69.5309
8	2009-08-02	09:00:00	25	12	44.2818		20	15	72.9388
8	2009-08-03	09:00:00	25	14	50.464		22.8	18.3	75.7709
8	2009-08-04	09:00:00	25	9	36.2579		18.3	12.2	67.5889
8	2009-08-05	09:00:00	25	12	44.2818		19.4	12.2	63.1014
8	2009-08-06	09:00:00	25	14	50.464		20.6	15	70.285
8	2009-08-07	09:00:00	25	16	57.3933		22.2	19.4	84.1723
8	2009-08-08	09:00:00	25	18	65.1455		25	22.8	87.6118
8	2009-08-09	09:00:00	25	16	57.3933		19.4	18.9	96.9324
8	2009-08-10	09:00:00	25	14	50.464		21.7	17.8	78.5116
8	2009-08-11	09:00:00	25	16	57.3933		23.3	16.7	66.4532
8	2009-08-12	09:00:00	25	17	61.1616		24.4	20.6	79.3849
8	2009-08-13	09:00:00	25	17	61.1616		26.1	17.8	60.2634
8	2009-08-14	09:00:00	25	18	65.1455		25	18.3	66.3843
8	2009-08-15	09:00:00	25	17	61.1616		21.1	19.4	90.028
8	2009-08-16	09:00:00	25	14	50.464		19.4	16.1	81.2326
8	2009-08-17	09:00:00	25	12	44.2818		19.4	14.4	72.8325
8	2009-08-18	09:00:00	25	9	36.2579		20	11.1	56.5357
8	2009-08-19	09:00:00	25	15	53.8306		19.4	18.3	93.3606
8	2009-08-20	09:00:00	25	12	44.2818		16.7	13.3	80.353
8	2009-08-21	09:00:00	25	11	41.4488		17.2	13.3	77.8468
8	2009-08-22	09:00:00	25	S	#VALUE!		17.2	14.4	83.6085
8	2009-08-23	09:00:00	25	14	50.464		20	15	72.9388
8	2009-08-24	09:00:00	25	14	50.464		20	16.1	78.2639
8	2009-08-25	09:00:00	25	13	47.284		18.9	15.6	81.1677
8	2009-08-26	09:00:00	25	13	47.284		18.3	15	81.0894
8	2009-08-27	09:00:00	25	13	47.284		18.9	15	78.1014
8	2009-08-28	09:00:00	25	14	50.464		19.4	15.6	78.6778
8	2009-08-29	09:00:00	25	8	33.8844		16.1	11.7	75.1628
8	2009-08-30	09:00:00	25	7	31.6492		15	9.4	69.194
8	2009-08-31	09:00:00	25	9	36.2579		15	10	72.0348
9	2009-09-01	09:00:00	25	9	36.2579		16.1	10.6	69.8765
9	2009-09-02	09:00:00	25	10	38.7768		16.7	12.2	74.7697
9	2009-09-03	09:00:00	25	13	47.284		17.2	15.6	90.3187
9	2009-09-04	09:00:00	25	12	44.2818		18.3	13.3	72.6361
9	2009-09-05	09:00:00	25	12	44.2818		18.9	15	78.1014
9	2009-09-06	09:00:00	25	14	50.464		20	16.1	78.2639
9	2009-09-07	09:00:00	25	14	50.464		20	16.1	78.2639
9	2009-09-08	09:00:00	25	15	53.8306		21.1	17.2	78.4247
9	2009-09-09	09:00:00	25	16	57.3933		20	18.9	93.3899
9	2009-09-10	09:00:00	25	15	53.8306		21.7	16.7	73.2368
9	2009-09-11	09:00:00	25	14	50.464		20	16.1	78.2639
9	2009-09-12	09:00:00	25	12	44.2818		17	17	100
9	2009-09-13	09:00:00	25	16	57.3933		19.4	16.1	81.2326
9	2009-09-14	09:00:00	25	13	47.284		19.4	14.4	72.8325
9	2009-09-15	09:00:00	25	12	44.2818		18.3	12.8	70.3022
9	2009-09-16	09:00:00	25	13	47.284		20	13.9	67.935
9	2009-09-17	09:00:00	25	14	50.464		20	15	72.9388
9	2009-09-18	09:00:00	25	13	47.284		20.6	15	70.285
9	2009-09-19	09:00:00	25	12	44.2818		20	13.3	65.3351
9	2009-09-20	09:00:00	25	9	36.2579		17.8	10.6	62.7399
9	2009-09-21	09:00:00	25	14	50.464		15	13.3	89.5752
9	2009-09-22	09:00:00	25	11	41.4488		14.4	12.2	86.6392
9	2009-09-23	09:00:00	25	11	41.4488		16.1	13.3	83.4805
9	2009-09-24	09:00:00	25	13	47.284		15	14.4	96.2049
9	2009-09-25	09:00:00	25	10	38.7768		13.3	11.7	90.0363
9	2009-09-26	09:00:00	25	10	38.7768		13.9	11.7	86.5905
9	2009-09-27	09:00:00	25	8	33.8844		17.2	11.1	67.3623
9	2009-09-28	09:00:00	25	1	20.7701		10	2.2	58.367
9	2009-09-29	09:00:00	25	3	23.9555		8.9	5.6	79.799
9	2009-09-30	09:00:00	25	3	23.9555		10.6	5.6	71.2044
10	2009-10-01	09:00:00	12	9			12.8	12.2
10	2009-10-02	09:00:00	8	4			8	8
10	2009-10-03	09:00:00	7	3			7.8	6.1
10	2009-10-04	09:00:00	7	4			8.9	5.6
10	2009-10-05	09:00:00	7	3			7.2	7.2
10	2009-10-06	09:00:00	6	3			7.8	6.7
10	2009-10-07	09:00:00	6	2			7.2	2.8
10	2009-10-08	09:00:00	4	-2			5.6	1.1
10	2009-10-09	09:00:00	2	-4			2.8	-2.2
10	2009-10-10	09:00:00	-3	-9			-2.2	-7.8
10	2009-10-11	09:00:00	-3	-8			-1.7	-6.1
10	2009-10-12	09:00:00	-1	-4			-0.6	-1.7
10	2009-10-13	09:00:00	-1	-6			0	-3.3
10	2009-10-14	09:00:00	2	-2			2.8	0
10	2009-10-15	09:00:00	4	2			5.6	4.4
10	2009-10-16	09:00:00	3	0			3.9	2.2
10	2009-10-17	09:00:00	3	-2			3.9	-0.6
10	2009-10-18	09:00:00	7	2			8.3	3.9
10	2009-10-19	09:00:00	S	S			10	6.1
10	2009-10-20	09:00:00	7	3			8.9	6.1
10	2009-10-21	09:00:00	5	2			6.1	5
10	2009-10-22	09:00:00	1	-3			2.2	0.6
10	2009-10-23	09:00:00	1	-3			1.7	0.6
10	2009-10-24	09:00:00	3	-1			3.9	2.2
10	2009-10-25	09:00:00	5	1			6.7	4.4
10	2009-10-26	09:00:00	4	1			3.3	1.1
10	2009-10-27	09:00:00	M	M			7.8	0
10	2009-10-28	09:00:00	6	2			7.2	5.6
10	2009-10-29	09:00:00	10	7			10	8.9
10	2009-10-30	09:00:00	3	0			5	4.4
10	2009-10-31	09:00:00	1	-4			1.7	-1.7
11	2009-11-01	09:00:00	6	2			7.2	3.9
11	2009-11-02	09:00:00	3	-2			3.9	0
11	2009-11-03	09:00:00	2	-4			3.3	-2.2
11	2009-11-04	09:00:00	2	-1			1.7	-0.6
11	2009-11-05	09:00:00	3	-2			6.1	-0.6
11	2009-11-06	09:00:00	6	3			10	7.2
11	2009-11-07	09:00:00	7	0			10	0
11	2009-11-08	09:00:00	11	-3			10.6	-0.6
11	2009-11-09	09:00:00	0	-3			2.2	0
11	2009-11-10	09:00:00	4	-4			3.3	-0.6
11	2009-11-11	09:00:00	M	M			8.3	3.3
11	2009-11-12	09:00:00	M	M			11.1	8.9
11	2009-11-13	09:00:00	9	6			9	8
11	2009-11-14	09:00:00	2	-1			2.8	1.7
11	2009-11-15	09:00:00	-4	-7			-2.2	-3.3
11	2009-11-16	09:00:00	-6	-9			-0.6	-2.2
11	2009-11-17	09:00:00	-6	-8			-2.2	-3.9
11	2009-11-18	09:00:00	-4	-7			-2.8	-5
11	2009-11-19	09:00:00	3	1			5.6	2.8
11	2009-11-20	09:00:00	-3	-4			-1.1	-2.8
11	2009-11-21	09:00:00	1	-4			3.3	-2.2
11	2009-11-22	09:00:00	7	6			9.4	8.3
11	2009-11-23	09:00:00	6	6			6.1	6.1
11	2009-11-24	09:00:00	2	0			3.9	2.2
11	2009-11-25	09:00:00	1	-2			1.7	-1.1
11	2009-11-26	09:00:00	-4	-7			-0.6	-6.1
11	2009-11-27	09:00:00	-3	-5			-1.7	-3.3
11	2009-11-28	09:00:00	-2	-3			-0.6	-2.8
11	2009-11-29	09:00:00	-1	-3			0	-2.2
11	2009-11-30	09:00:00	-3	-5			-1.7	-4.4
12	2009-12-01	09:00:00	0	-4			-0.6	-3.9
12	2009-12-02	09:00:00	-6	-7			-4.4	-7.8
12	2009-12-03	09:00:00	-9	-11			-7.8	-10.6
12	2009-12-04	09:00:00	-14	-15			-10.6	-13.3
12	2009-12-05	09:00:00	-11	-12			-10.6	-13.9
12	2009-12-06	09:00:00	-16	-16			-12.8	-15
12	2009-12-07	09:00:00	-11	-12			-9.4	-12.8
12	2009-12-08	09:00:00	-13	-14			-10	-12.2
12	2009-12-09	09:00:00	-19	-22			-17.2	-21.7
12	2009-12-10	09:00:00	-18	-18			-17.8	-22.8
12	2009-12-11	09:00:00	-16	-17			-15.6	-18.9
12	2009-12-12	09:00:00	-12	-13			-8.3	-11.1
12	2009-12-13	09:00:00	-21	-23			-17.2	-20.6
12	2009-12-14	09:00:00	-20	-22			-17.8	-21.7
12	2009-12-15	09:00:00	-24	-25			-22.2	-26.1
12	2009-12-16	09:00:00	-16	-18			-14.4	-17.8
12	2009-12-17	09:00:00	-12	-13			-12.2	-13.9
12	2009-12-18	09:00:00	-11	-12			-11.1	-13.3
12	2009-12-19	09:00:00	-9	-10			-8.3	-9.4
12	2009-12-20	09:00:00	-5	-6			-2.8	-4.4
12	2009-12-21	09:00:00	-7	-8			-5	-6
12	2009-12-22	09:00:00	-7	-8			-5.6	-7.2
12	2009-12-23	09:00:00	-4	-4			-2.2	-3.3
12	2009-12-24	09:00:00	-6	-7			-7.8	-10.6
12	2009-12-25	09:00:00	-6	-6			-7	-9
12	2009-12-26	09:00:00	-4	-6			-2.8	-4.4
12	2009-12-27	09:00:00	-7	-8			-5.6	-7.2
12	2009-12-28	09:00:00	-11	-13			-8.3	-10.6
12	2009-12-29	09:00:00	-19	-19			-16.1	-18.3
12	2009-12-30	09:00:00	-7	-8			-6.1	-7.2
12	2009-12-31	09:00:00	-17	-20			-14.4	-16.7
1	2010-01-01	09:00:00	-22	-26			-17.2	-20
1	2010-01-02	09:00:00	-34	M			-32.2	-33.3
1	2010-01-03	09:00:00	-18	-26			-17.8	-21.7
1	2010-01-04	09:00:00	-18	M			-17.8	-20.6
1	2010-01-05	09:00:00	-18	-24			-22.8	-23.3
1	2010-01-06	09:00:00	-13	-16			-14	-16
1	2010-01-07	09:00:00	-19	-21			-17.7	-21.7
1	2010-01-08	09:00:00	-28	-34			-26.1	-28.3
1	2010-01-09	09:00:00	-29	-33			-29	-31
1	2010-01-10	09:00:00	-14	-19			-13.3	-16.1
1	2010-01-11	09:00:00	-13	-14			-10	-12.2
1	2010-01-12	09:00:00	-13	-14			-11.7	-12.8
1	2010-01-13	09:00:00	-9	-10			-7.8	-8.3
1	2010-01-14	09:00:00	-3	-3			-3	-4
1	2010-01-15	09:00:00	-11	-11			-8.3	-9.4
1	2010-01-16	09:00:00	-7	-8			-5	-5.6
1	2010-01-17	09:00:00	-12	-12			-9	-9
1	2010-01-18	09:00:00	-11	-12			-10	-10
1	2010-01-19	09:00:00	-9	-10			-8	-9
1	2010-01-20	09:00:00	-6	-8			-4.4	-6.1
1	2010-01-21	09:00:00	-3	-4			-2.2	-2.8
1	2010-01-22	09:00:00	-3	-3			-2	-2
1	2010-01-23	09:00:00	1	0			1.7	1.1
1	2010-01-24	09:00:00	-4	-6			-3.9	-6.1
1	2010-01-25	09:00:00	-8	-11			-7.8	-10
1	2010-01-26	09:00:00	-19	-21			-17.8	-20.6
1	2010-01-27	09:00:00	-16	-18			-10.6	-15
1	2010-01-28	09:00:00	-23	-24			-18.9	-22.8
1	2010-01-29	09:00:00	-21	-22			-21.1	-22.2
1	2010-01-30	09:00:00	-15	-17			-12.8	-16.1
1	2010-01-31	09:00:00	-21	-21			-16.1	-18.9
2	2010-02-01	09:00:00	-14	-16			-12	-14
2	2010-02-02	09:00:00	-21	-21			-20	-21.7
2	2010-02-03	09:00:00	-14	-15			-13.3	-15.6
2	2010-02-04	09:00:00	-2	-3			1	1
2	2010-02-05	09:00:00	-3	-5			-3	-3
2	2010-02-06	09:00:00	-4	-6			-2.8	-3.9
2	2010-02-07	09:00:00	-6	-7			-5	-6.1
2	2010-02-08	09:00:00	-23	-25			-21.1	-23.9
2	2010-02-09	09:00:00	-11	-13			-8.9	-11.1
2	2010-02-10	09:00:00	-23	-29			-21.7	-23.3
2	2010-02-11	09:00:00	-10	-12			-7.8	-10.6
2	2010-02-12	09:00:00	-8	-9			-6.7	-8.3
2	2010-02-13	09:00:00	-8	-8			-5	-6.1
2	2010-02-14	09:00:00	-14	-16			-12.8	-16.1
2	2010-02-15	09:00:00	-12	-15			-10	-13.3
2	2010-02-16	09:00:00	-13	-17			-8.3	-12.8
2	2010-02-17	09:00:00	-18	-21			-15.6	-19.4
2	2010-02-18	09:00:00	-12	-15			-7.2	-11.7
2	2010-02-19	09:00:00	-12	-16			-7.8	-12.2
2	2010-02-20	09:00:00	-10	-12			-9.4	-11.7
2	2010-02-21	09:00:00	-8	-9			-6.1	-7.8
2	2010-02-22	09:00:00	-16	-17			-13.9	-15
2	2010-02-23	09:00:00	-14	-16			-11.1	-13.9
2	2010-02-24	09:00:00	-23	-29			-21.1	-24.4
2	2010-02-25	09:00:00	-16	-23			-16.1	-20.6
2	2010-02-26	09:00:00	-8	-12			-7.2	-11.7
2	2010-02-27	09:00:00	-7	-12			-4.4	-7.8
2	2010-02-28	09:00:00	-14	-16			-11.7	-13.3
3	2010-03-01	09:00:00	-13	-17			-9.4	-14.4
3	2010-03-02	09:00:00	-12	-13			-11.1	-11.7
3	2010-03-03	09:00:00	-6	-8			-6.7	-8.3
3	2010-03-04	09:00:00	-4	-8			-1.7	-6.1
3	2010-03-05	09:00:00	-3	-6			-1.7	-4.4
3	2010-03-06	09:00:00	-1	-4			-0.6	-2.2
3	2010-03-07	09:00:00	-1	-1			1	0
3	2010-03-08	09:00:00	1	0			0.6	0.6
3	2010-03-09	09:00:00	1	0			1.1	0.6
3	2010-03-10	09:00:00	1	0			1.1	1.1
3	2010-03-11	09:00:00	1	0			1.1	0.6
3	2010-03-12	09:00:00	1	1			1.7	1.7
3	2010-03-13	09:00:00	1	1			1.7	1.7
3	2010-03-14	09:00:00	2	1			2.2	2.2
3	2010-03-15	09:00:00	1	0			2.8	1.7
3	2010-03-16	09:00:00	1	1			1.1	1.1
3	2010-03-17	09:00:00	2	-1			2.8	0
3	2010-03-18	09:00:00	3	1			5.6	0.6
3	2010-03-19	09:00:00	-4	-8			-1.7	-6.1
3	2010-03-20	09:00:00	-4	-10			-3.9	-8.9
3	2010-03-21	09:00:00	-1	-6			0.6	-5.6
3	2010-03-22	09:00:00	2	-5			3.9	-4.4
3	2010-03-23	09:00:00	3	1			3.9	1.1
3	2010-03-24	09:00:00	-1	-6			0.6	-4.4
3	2010-03-25	09:00:00	-3	-8			0	-4.4
3	2010-03-26	09:00:00	2	-6			3.9	-5.6
3	2010-03-27	09:00:00	4	-1			7.2	-0.6
3	2010-03-28	09:00:00	0	-3			2.2	-3.3
3	2010-03-29	09:00:00	7	-1			8.3	0.6
3	2010-03-30	09:00:00	12	3			15	3.3
3	2010-03-31	09:00:00	13	5			16.1	5.6
4	2010-04-01	09:00:00	12	1			13.3	3.9
4	2010-04-02	09:00:00	8	4			9.4	5
4	2010-04-03	09:00:00	6	1			7.2	0
4	2010-04-04	09:00:00	7	3			8.3	2.8
4	2010-04-05	09:00:00	7	1			7.2	2.8
4	2010-04-06	09:00:00	7	3			7.2	5.6
4	2010-04-07	09:00:00	6	-7			5	-3.9
4	2010-04-08	09:00:00	4	-2			6.1	-2.8
4	2010-04-09	09:00:00	10	-2			12.2	0.6
4	2010-04-10	09:00:00	9	-2			10	-1.1
4	2010-04-11	09:00:00	12	-2			12.2	-1.7
4	2010-04-12	09:00:00	14	8			12.8	8.3
4	2010-04-13	09:00:00	16	12			18.9	13.3
4	2010-04-14	09:00:00	16	11			16.1	12.8
4	2010-04-15	09:00:00	12	2			12.8	6.7
4	2010-04-16	09:00:00	8	-4			6.7	1.7
4	2010-04-17	09:00:00	9	-4			10	-2.2
4	2010-04-18	09:00:00	12	-2			11.1	2.2
4	2010-04-19	09:00:00	13	0			12.8	1.7
4	2010-04-20	09:00:00	16	-1			14.4	2.8
4	2010-04-21	09:00:00	12	3			12.2	4.4
4	2010-04-22	09:00:00	13	3			13.3	5
4	2010-04-23	09:00:00	16	8			14.4	10
4	2010-04-24	09:00:00	11	10			12.8	12.2
4	2010-04-25	09:00:00	8	6			8.9	7.2
4	2010-04-26	09:00:00	8	6			6.7	5.6
4	2010-04-27	09:00:00	9	6			7.2	5
4	2010-04-28	09:00:00	13	3			13.9	4.4
4	2010-04-29	09:00:00	12	8			13.3	8.9
4	2010-04-30	09:00:00	12	8			13.3	8.9
5	2010-05-01	09:00:00	10	2			11.1	2.8
5	2010-05-02	09:00:00	9	2			10.6	3.3
5	2010-05-03	09:00:00	8	2			8.9	2.8
5	2010-05-04	09:00:00	16	6			17.8	5.6
5	2010-05-05	09:00:00	8	1			9.4	0
5	2010-05-06	09:00:00	5	1			6.7	2.8
5	2010-05-07	09:00:00	7	5			6.1	3.9
5	2010-05-08	09:00:00	6	-2			6.7	0.6
5	2010-05-09	09:00:00	6	-1			7.8	1.1
5	2010-05-10	09:00:00	8	3			8.9	5
5	2010-05-11	09:00:00	4	2			5	3.9
5	2010-05-12	09:00:00	5	3			5	3.9
5	2010-05-13	09:00:00	7	6			7.8	6.1
5	2010-05-14	09:00:00	13	6			13.3	6.7
5	2010-05-15	09:00:00	16	6			16.1	6.1
5	2010-05-16	09:00:00	16	7			16.7	8.9
5	2010-05-17	09:00:00	S	S			16.7	7.8
5	2010-05-18	09:00:00	19	7			19.4	8.9
5	2010-05-19	09:00:00	18	7			19.4	7.8
5	2010-05-20	09:00:00	20	5			18.9	7.2
5	2010-05-21	09:00:00	17	9			18.3	11.7
5	2010-05-22	09:00:00	16	13			18.9	15
5	2010-05-23	09:00:00	20	11			18.9	14.4
5	2010-05-24	09:00:00	24	20			26.7	20.6
5	2010-05-25	09:00:00	17	9			18.3	12.8
5	2010-05-26	09:00:00	17	9			18.9	12.8
5	2010-05-27	09:00:00	22	8			22.8	8.3
5	2010-05-28	09:00:00	22	7			23.3	8.9
5	2010-05-29	09:00:00	24	14			24.4	15.6
5	2010-05-30	09:00:00	13	11			15.6	13.9
5	2010-05-31	09:00:00	17	10			18.9	9.4
6	2010-06-01	09:00:00	22	12			21.7	16.7
6	2010-06-02	09:00:00	15	5			15	9.4
6	2010-06-03	09:00:00	19	7			19.4	9.4
6	2010-06-04	09:00:00	20	13			22.2	14.4
6	2010-06-05	09:00:00	14	12			18.3	16.1
6	2010-06-06	09:00:00	18	11			18.9	12.2
6	2010-06-07	09:00:00	19	11			20.6	12.8
6	2010-06-08	09:00:00	17	16			20	17.8
6	2010-06-09	09:00:00	17	9			18.9	10.6
6	2010-06-10	09:00:00	14	13			16.1	15
6	2010-06-11	09:00:00	20	17			21.7	18.9
6	2010-06-12	09:00:00	15	14			19	18
6	2010-06-13	09:00:00	16	14			16.1	15
6	2010-06-14	09:00:00	14	13			16	15
6	2010-06-15	09:00:00	15	12			16.1	13.3
6	2010-06-16	09:00:00	20	13			21.1	13.9
6	2010-06-17	09:00:00	24	19			24.4	20.6
6	2010-06-18	09:00:00	21	10			21.7	12.2
6	2010-06-19	09:00:00	17	12			18.9	13.3
6	2010-06-20	09:00:00	22	16			23.3	18.3
6	2010-06-21	09:00:00	18	16			18.9	17.2
6	2010-06-22	09:00:00	24	21			24.4	20
6	2010-06-23	09:00:00	18	15			20	16.1
6	2010-06-24	09:00:00	22	15			22.2	13.3
6	2010-06-25	09:00:00	24	18			23.9	18.9
6	2010-06-26	09:00:00	26	22			26.1	22.8
6	2010-06-27	09:00:00	22	17			21.1	18.9
6	2010-06-28	09:00:00	19	12			22.2	16.1
6	2010-06-29	09:00:00	19	11			20	12.2
6	2010-06-30	09:00:00	21	14			22.2	13.3
7	2010-07-01	09:00:00	25	16	57.3933		25	16.1	57.7607
7	2010-07-02	09:00:00	25	16	57.3933		24.4	15.6	57.9863
7	2010-07-03	09:00:00	25	21	78.4976		27.2	21.1	69.3461
7	2010-07-04	09:00:00	25	19	69.3555		22.2	20	87.3652
7	2010-07-05	09:00:00	25	17	61.1616		23.3	18.9	76.3257
7	2010-07-06	09:00:00	25	16	57.3933		23.3	19.4	78.7412
7	2010-07-07	09:00:00	25	16	57.3933		20	17.2	83.9277
7	2010-07-08	09:00:00	25	16	57.3933		23.9	15.6	59.7523
7	2010-07-09	09:00:00	25	16	57.3933		24.4	18.3	68.8076
7	2010-07-10	09:00:00	25	18	65.1455		25	17.2	61.9408
7	2010-07-11	09:00:00	25	16	57.3933		21.7	17.8	78.5116
7	2010-07-12	09:00:00	25	11	41.4488		19.4	13.3	67.8134
7	2010-07-13	09:00:00	25	19	69.3555		23.9	20	78.8264
7	2010-07-14	09:00:00	25	23	88.6796		28.3	23.3	74.3516
7	2010-07-15	09:00:00	25	14	50.464		23.3	14.4	57.3491
7	2010-07-16	09:00:00	25	18	65.1455		25	18.9	68.9241
7	2010-07-17	09:00:00	25	23	88.6796		28.3	25	82.3361
7	2010-07-18	09:00:00	25	16	57.3933		21.7	18.3	81.0176
7	2010-07-19	09:00:00	25	13	47.284		17.2	15.6	90.3187
7	2010-07-20	09:00:00	25	19	69.3555		23.9	20.6	81.8026
7	2010-07-21	09:00:00	25	17	61.1616		22.2	17.2	73.3236
7	2010-07-22	09:00:00	25	21	78.4976		22.2	19.4	84.1723
7	2010-07-23	09:00:00	25	17	61.1616		23.9	20.6	81.8026
7	2010-07-24	09:00:00	25	13	47.284		21.7	17.2	75.5946
7	2010-07-25	09:00:00	25	15	53.8306		22.8	18.3	75.7709
7	2010-07-26	09:00:00	25	19	69.3555		21.1	18.9	87.2664
7	2010-07-27	09:00:00	25	21	78.4976		28.3	21.1	65.0301
7	2010-07-28	09:00:00	25	13	47.284		21.7	15	65.6967
7	2010-07-29	09:00:00	25	16	57.3933		22.8	16.1	65.928
7	2010-07-30	09:00:00	25	18	65.1455		22.2	19.4	84.1723
7	2010-07-31	09:00:00	25	22	83.4526		26.1	21.7	76.7573
8	2010-08-01	09:00:00	25	20	73.8025		26.1	20.6	71.7464
8	2010-08-02	09:00:00	25	21	78.4976		22.2	21.7	96.9959
8	2010-08-03	09:00:00	25	23	88.6796		26.7	23.3	81.6504
8	2010-08-04	09:00:00	25	18	65.1455		25	20.6	76.5891
8	2010-08-05	09:00:00	25	13	47.284		22.8	12.2	51.2128
8	2010-08-06	09:00:00	25	17	61.1616		23.3	18.3	73.5132
8	2010-08-07	09:00:00	25	20	73.8025		25.6	20.6	73.9036
8	2010-08-08	09:00:00	25	23	88.6796		28.3	23.9	77.0886
8	2010-08-09	09:00:00	25	21	78.4976		25	21.7	81.9381
8	2010-08-10	09:00:00	25	21	78.4976		24.4	20.6	79.3849
8	2010-08-11	09:00:00	25	23	88.6796		26.7	23.3	81.6504
8	2010-08-12	09:00:00	25	23	88.6796		28.3	23.3	74.3516
8	2010-08-13	09:00:00	25	19	69.3555		23.9	21.1	84.3576
8	2010-08-14	09:00:00	25	14	50.464		23.3	17.8	71.2394
8	2010-08-15	09:00:00	25	12	44.2818		19.4	13.3	67.8134
8	2010-08-16	09:00:00	25	13	47.284		20	13.3	65.3351
8	2010-08-17	09:00:00	25	12	44.2818		20.6	16.1	75.4164
8	2010-08-18	09:00:00	25	17	61.1616		20	17.2	83.9277
8	2010-08-19	09:00:00	25	19	69.3555		22.8	19.4	81.1595
8	2010-08-20	09:00:00	25	20	73.8025		25.6	20	71.2147
8	2010-08-21	09:00:00	25	21	78.4976		22.2	21.7	96.9959
8	2010-08-22	09:00:00	25	21	78.4976		26.7	21.1	71.4138
8	2010-08-23	09:00:00	25	20	73.8025		25.6	20	71.2147
8	2010-08-24	09:00:00	25	11	41.4488		18.9	11.7	62.9889
8	2010-08-25	09:00:00	25	10	38.7768		18.3	12.2	67.5889
8	2010-08-26	09:00:00	25	12	44.2818		20	13.3	65.3351
8	2010-08-27	09:00:00	25	13	47.284		22.2	12.8	55.2461
8	2010-08-28	09:00:00	25	M	#VALUE!		22.8	13.9	57.2271
8	2010-08-29	09:00:00	25	M	#VALUE!		24.4	13.3	49.9791
8	2010-08-30	09:00:00	25	20	73.8025		25	20	73.8025
8	2010-08-31	09:00:00	25	17	61.1616		22.2	18.9	81.5902
9	2010-09-01	09:00:00	25	13	47.284		18.3	13.9	75.5265
9	2010-09-02	09:00:00	25	12	44.2818		15.6	12.2	80.2023
9	2010-09-03	09:00:00	25	8	33.8844		14.4	8.3	66.7757
9	2010-09-04	09:00:00	25	9	36.2579		15.6	8.9	64.3752
9	2010-09-05	09:00:00	25	11	41.4488		16.7	12.2	74.7697
9	2010-09-06	09:00:00	25	14	50.464		18.3	16.1	87.0096
9	2010-09-07	09:00:00	25	7	31.6492		14.4	7.8	64.5453
9	2010-09-08	09:00:00	25	8	33.8844		13.3	8.9	74.6887
9	2010-09-09	09:00:00	25	11	41.4488		15	12.2	83.3511
9	2010-09-10	09:00:00	25	13	47.284		16.1	15.6	96.855
9	2010-09-11	09:00:00	25	9	36.2579		16.1	11.1	72.2373
9	2010-09-12	09:00:00	25	10	38.7768		18.9	14.4	75.1374
9	2010-09-13	09:00:00	25	10	38.7768		17.2	10	62.6031
9	2010-09-14	09:00:00	25	M	#VALUE!		15	12.2	83.3511
9	2010-09-15	09:00:00	25	12	44.2818		18.9	16.1	83.8034
9	2010-09-16	09:00:00	25	8	33.8844		10.6	8.9	89.2296
9	2010-09-17	09:00:00	25	13	47.284		15	13.3	89.5752
9	2010-09-18	09:00:00	25	1	20.7701		5	2.8	85.6805
9	2010-09-19	09:00:00	25	4	25.7046		11.1	5	66.066
9	2010-09-20	09:00:00	25	12	44.2818		13.9	13.3	96.173
9	2010-09-21	09:00:00	25	11	41.4488		17.2	12.8	75.3456
9	2010-09-22	09:00:00	25	9	36.2579		12.8	10	83.0879
9	2010-09-23	09:00:00	25	18	65.1455		18.9	18.9	100
9	2010-09-24	09:00:00	25	7	31.6492		10.6	6.1	73.7093
9	2010-09-25	09:00:00	25	11	41.4488		12.8	10.6	86.4827
9	2010-09-26	09:00:00	25	9	36.2579		10.6	9.4	92.2857
9	2010-09-27	09:00:00	25	9	36.2579		12.2	7.2	71.5103
9	2010-09-28	09:00:00	25	12	44.2818		15.6	12.2	80.2023
9	2010-09-29	09:00:00	25	12	44.2818		18.3	11.1	62.8533
9	2010-09-30	09:00:00	25	9	36.2579		15.6	8.3	61.8146
10	2010-10-01	09:00:00	15	9			15.6	9.4
10	2010-10-02	09:00:00	7	4			8.3	3.9
10	2010-10-03	09:00:00	8	2			8.3	1.7
10	2010-10-04	09:00:00	9	4			10.6	3.9
10	2010-10-05	09:00:00	13	6			13.9	6.1
10	2010-10-06	09:00:00	13	6			15.6	10
10	2010-10-07	09:00:00	12	7			11.7	6.1
10	2010-10-08	09:00:00	15	7			17.2	9.4
10	2010-10-09	09:00:00	17	11			18.3	11.7
10	2010-10-10	09:00:00	16	13			16.1	11.1
10	2010-10-11	09:00:00	16	13			15.6	12.2
10	2010-10-12	09:00:00	13	11			13.9	11.1
10	2010-10-13	09:00:00	8	4			10.6	4.4
10	2010-10-14	09:00:00	9	3			10.6	1.7
10	2010-10-15	09:00:00	8	4			9.4	4.4
10	2010-10-16	09:00:00	12	3			12.8	3.3
10	2010-10-17	09:00:00	4	2			7.2	2.2
10	2010-10-18	09:00:00	6	2			7.2	1.7
10	2010-10-19	09:00:00	5	4			6.1	3.9
10	2010-10-20	09:00:00	10	3			10	1.1
10	2010-10-21	09:00:00	5	0			7.8	-0.6
10	2010-10-22	09:00:00	9	0			10	0
10	2010-10-23	09:00:00	14	12			14.4	12.2
10	2010-10-24	09:00:00	9	8			10	8.3
10	2010-10-25	09:00:00	12	10			12.8	9.4
10	2010-10-26	09:00:00	3	1			4.4	1.1
10	2010-10-27	09:00:00	1	-2			1.1	-1.1
10	2010-10-28	09:00:00	-2	-6			-1.1	-5
10	2010-10-29	09:00:00	2	-3			5	-3.9
10	2010-10-30	09:00:00	5	2			7.8	1.7
10	2010-10-31	09:00:00	1	0			1.1	-0.6
11	2010-11-01	09:00:00	5	-1			6.1	-1.7
11	2010-11-02	09:00:00	4	0			6.7	-0.6
11	2010-11-03	09:00:00	8	2			8.3	1.7
11	2010-11-04	09:00:00	3	-1			4.4	-0.6
11	2010-11-05	09:00:00	0	-3			-0.6	-3.3
11	2010-11-06	09:00:00	3	-3			5	-3.9
11	2010-11-07	09:00:00	5	1			7.2	1.7
11	2010-11-08	09:00:00	7	1			8.9	1.1
11	2010-11-09	09:00:00	9	4			9.4	4.4
11	2010-11-10	09:00:00	6	5			6.7	4.4
11	2010-11-11	09:00:00	2	-1			2.8	0
11	2010-11-12	09:00:00	3	2			3.9	1.7
11	2010-11-13	09:00:00	1	-4			1.7	-3.3
11	2010-11-14	09:00:00	-1	-3			0.6	-2.2
11	2010-11-15	09:00:00	-2	-3			1.1	-0.6
11	2010-11-16	09:00:00	0	0			2.2	0
11	2010-11-17	09:00:00	1	-2			1.7	-0.6
11	2010-11-18	09:00:00	-5	-7			-3.3	-6.1
11	2010-11-19	09:00:00	-1	-5			1.7	-1.7
11	2010-11-20	09:00:00	-9	-13			-7.8	-12.8
11	2010-11-21	09:00:00	-3	-4			-1.7	-1.7
11	2010-11-22	09:00:00	-9	-11			-7.8	-8.9
11	2010-11-23	09:00:00	-14	-16			-12.2	-15.6
11	2010-11-24	09:00:00	-4	-6			-2.8	-5.6
11	2010-11-25	09:00:00	-15	-17			-14.4	-18.9
11	2010-11-26	09:00:00	-2	-27			-1.1	-5.6
11	2010-11-27	09:00:00	-6	-30			-4.4	-6.1
11	2010-11-28	09:00:00	1	-25			3.3	-5.6
11	2010-11-29	09:00:00	-6	-29			-3.3	-5.6
11	2010-11-30	09:00:00	-9	-32			-7.8	-11.7
12	2010-12-01	09:00:00	-14	M			-12.8	-15.6
12	2010-12-02	09:00:00	-7	-31			-6.7	-9.4
12	2010-12-03	09:00:00	-7	-31			-5.6	-7.2
12	2010-12-04	09:00:00	-10	-13			-7.2	-10
12	2010-12-05	09:00:00	-11	-13			-10.6	-12.2
12	2010-12-06	09:00:00	-11	-13			-9.4	-10.6
12	2010-12-07	09:00:00	-17	-19			-13.3	-15.6
12	2010-12-08	09:00:00	-13	-14			-12.8	-15.6
12	2010-12-09	09:00:00	-6	-9			-2.2	-5
12	2010-12-10	09:00:00	-7	-9			-3.3	-5
12	2010-12-11	09:00:00	-14	-17			-12.8	-15
12	2010-12-12	09:00:00	-17	-24			-16.7	-23.9
12	2010-12-13	09:00:00	-16	-22			-15.6	-22.2
12	2010-12-14	09:00:00	-9	-14			-7.8	-12.8
12	2010-12-15	09:00:00	-8	-12			-7.8	-11.7
12	2010-12-16	09:00:00	-15	-17			-8.3	-10.6
12	2010-12-17	09:00:00	-12	-14			-12.8	-15
12	2010-12-18	09:00:00	-14	-17			-15	-17.8
12	2010-12-19	09:00:00	-17	-19			-16.7	-18.9
12	2010-12-20	09:00:00	-5	-7			-3.9	-5
12	2010-12-21	09:00:00	-13	-16			-13.3	-16.7
12	2010-12-22	09:00:00	-8	-11			-7.2	-9.4
12	2010-12-23	09:00:00	-6	-7			-4.4	-5.6
12	2010-12-24	09:00:00	-6	-8			-4.4	-6.1
12	2010-12-25	09:00:00	-12	-14			-10.6	-12.8
12	2010-12-26	09:00:00	-19	-21			-18.3	-19.4
12	2010-12-27	09:00:00	-9	-12			-10.6	-12.2
12	2010-12-28	09:00:00	-13	-14			-12.2	-13.9
12	2010-12-29	09:00:00	-6	-9			-2.2	-6.1
12	2010-12-30	09:00:00	2	0			1.1	1.1
12	2010-12-31	09:00:00	-19	-22			-17	-19
1	2011-01-01	09:00:00	-18	-21			-16.7	-19.4
1	2011-01-02	09:00:00	-21	-24			-16.7	-20
1	2011-01-03	09:00:00	-5	-7			-5	-8.3
1	2011-01-04	09:00:00	-18	-21			-16.7	-18.3
1	2011-01-05	09:00:00	-6	-10			-4.4	-8.9
1	2011-01-06	09:00:00	-1	-3			-0.6	-2.8
1	2011-01-07	09:00:00	-4	-7			-2.8	-5
1	2011-01-08	09:00:00	-19	-22			-16.7	-19.4
1	2011-01-09	09:00:00	-14	-17			-12.2	-14.4
1	2011-01-10	09:00:00	-11	-13			-8.3	-10
1	2011-01-11	09:00:00	-18	-21			-20	-22
1	2011-01-12	09:00:00	-19	-22			-21.1	-23.3
1	2011-01-13	09:00:00	-14	-15			-13.9	-17.2
1	2011-01-14	09:00:00	-12	-14			-10	-13.3
1	2011-01-15	09:00:00	-14	-17			-11.7	-15
1	2011-01-16	09:00:00	-16	-18			-15	-18.3
1	2011-01-17	09:00:00	-5	-7			-3.3	-5.6
1	2011-01-18	09:00:00	-21	-24			-18.9	-22.8
1	2011-01-19	09:00:00	S	S			-23.9	-26.1
1	2011-01-20	09:00:00	S	S			-15.6	-18.3
1	2011-01-21	09:00:00	-22	-24			-20	-22.8
1	2011-01-22	09:00:00	-19	-23			-16.7	-19.4
1	2011-01-23	09:00:00	-22	-25			-22.8	-26.1
1	2011-01-24	09:00:00	-7	-8			-5	-6.7
1	2011-01-25	09:00:00	S	S			-10.6	-12.8
1	2011-01-26	09:00:00	-16	-19			-12.8	-13.3
1	2011-01-27	09:00:00	-8	-9			-3.9	-5.6
1	2011-01-28	09:00:00	-5	-7			-4.4	-5
1	2011-01-29	09:00:00	-8	-11			-5.6	-8.3
1	2011-01-30	09:00:00	-18	-21			-19.4	-23.3
1	2011-01-31	09:00:00	-12	-15			-10.6	-12.8
2	2011-02-01	09:00:00	-19	-22			-16.7	-19.4
2	2011-02-02	09:00:00	-28	-32			-23.3	-28.9
2	2011-02-03	09:00:00	-13	-19			-14.4	-20.6
2	2011-02-04	09:00:00	-7	-8			-6.7	-7.8
2	2011-02-05	09:00:00	-5	-7			-7.2	-8.3
2	2011-02-06	09:00:00	-5	-8			-2.2	-3.3
2	2011-02-07	09:00:00	-24	-27			-20.6	-23.9
2	2011-02-08	09:00:00	-29	-29			-25	-28.3
2	2011-02-09	09:00:00	-22	-25			-20.6	-25.6
2	2011-02-10	09:00:00	-22	-25			-16.7	-19.4
2	2011-02-11	09:00:00	-3	-6			-2.8	-4.4
2	2011-02-12	09:00:00	-3	-6			-1.7	-4.4
2	2011-02-13	09:00:00	2	-4			3.9	-2.8
2	2011-02-14	09:00:00	-2	-5			-0.6	-3.3
2	2011-02-15	09:00:00	1	-3			0.6	-2.2
2	2011-02-16	09:00:00	S	S			4.4	-1.1
2	2011-02-17	09:00:00	0	-1			1.7	1.7
2	2011-02-18	09:00:00	-8	-13			-3.9	-8.9
2	2011-02-19	09:00:00	-10	-15			-5.6	-8.9
2	2011-02-20	09:00:00	-8	-11			-5	-7.2
2	2011-02-21	09:00:00	-9	-12			-7.2	-8.9
2	2011-02-22	09:00:00	-17	-18			-14.4	-16.7
2	2011-02-23	09:00:00	-5	-8			-3.3	-6.1
2	2011-02-24	09:00:00	-16	-18			-12.8	-15.6
2	2011-02-25	09:00:00	-22	-24			-17.8	-22.2
2	2011-02-26	09:00:00	-19	-22			-16.1	-18.9
2	2011-02-27	09:00:00	-6	-8			-4.4	-5.6
2	2011-02-28	09:00:00	-20	-20			-12.8	-14.4
3	2011-03-01	09:00:00	-9	-10			-1.1	-4.4
3	2011-03-02	09:00:00	-21	-24			-17.8	-22.2
3	2011-03-03	09:00:00	-7	-9			-3.9	-6.1
3	2011-03-04	09:00:00	-12	-14			-7	-8
3	2011-03-05	09:00:00	-19	-21			-12.8	-16.7
3	2011-03-06	09:00:00	-9	-11			-6.1	-8.3
3	2011-03-07	09:00:00	-11	-13			-7.8	-10
3	2011-03-08	09:00:00	-8	-11			-5	-7
3	2011-03-09	09:00:00	-6	-9			-5	-7.2
3	2011-03-10	09:00:00	-12	-13			-8.3	-9.4
3	2011-03-11	09:00:00	2	-2			3.3	-1.1
3	2011-03-12	09:00:00	-10	-14			-6.1	-10.6
3	2011-03-13	09:00:00	-13	-15			-10	-13.3
3	2011-03-14	09:00:00	-5	-7			-3.3	-4.4
3	2011-03-15	09:00:00	1	-1			2.8	-0.6
3	2011-03-16	09:00:00	4	-1			5.6	1.7
3	2011-03-17	09:00:00	3	-1			7.2	2.8
3	2011-03-18	09:00:00	-2	-4			1.1	-2.8
3	2011-03-19	09:00:00	3	-1			3.9	0
3	2011-03-20	09:00:00	5	3			7.2	6.1
3	2011-03-21	09:00:00	0	-2			3.9	1.1
3	2011-03-22	09:00:00	2	-1			2.8	1.7
3	2011-03-23	09:00:00	-3	-6			-1.7	-3.3
3	2011-03-24	09:00:00	-7	-12			-5	-11.1
3	2011-03-25	09:00:00	-4	-8			-1.7	-3.9
3	2011-03-26	09:00:00	-6	-12			-2.2	-7.8
3	2011-03-27	09:00:00	-4	-9			-2.8	-7.8
3	2011-03-28	09:00:00	-2	-7			-1.1	-6.7
3	2011-03-29	09:00:00	-1	-6			-0.6	-3.9
3	2011-03-30	09:00:00	0	-4			0	-2.2
3	2011-03-31	09:00:00	3	-1			4.4	0.6
4	2011-04-01	09:00:00	3	-2			4.4	0
4	2011-04-02	09:00:00	4	-1			5.6	1.1
4	2011-04-03	09:00:00	9	3			10	3.9
4	2011-04-04	09:00:00	2	-6			2.8	-5
4	2011-04-05	09:00:00	6	-2			8.3	-4.4
4	2011-04-06	09:00:00	5	-1			8.9	2.8
4	2011-04-07	09:00:00	9	-1			10.6	-1.7
4	2011-04-08	09:00:00	8	4			8.3	5.6
4	2011-04-09	09:00:00	8	6			9.4	8.9
4	2011-04-10	09:00:00	8	6			10	8.9
4	2011-04-11	09:00:00	7	0			8.9	2.2
4	2011-04-12	09:00:00	13	2			13.9	0.6
4	2011-04-13	09:00:00	7	-2			9.4	-2.8
4	2011-04-14	09:00:00	0	-4			2.8	0.6
4	2011-04-15	09:00:00	2	-3			2.8	1.1
4	2011-04-16	09:00:00	-2	-6			-1.7	-3.9
4	2011-04-17	09:00:00	1	-6			1.1	-3.9
4	2011-04-18	09:00:00	1	-2			2.2	1.1
4	2011-04-19	09:00:00	2	-1			2.2	1.1
4	2011-04-20	09:00:00	1	-2			2.8	1.7
4	2011-04-21	09:00:00	3	-2			3.9	-0.6
4	2011-04-22	09:00:00	5	2			6.1	4.4
4	2011-04-23	09:00:00	4	1			5	1.7
4	2011-04-24	09:00:00	8	1			7.8	2.2
4	2011-04-25	09:00:00	10	0			10	1.7
4	2011-04-26	09:00:00	7	2			6.1	5.6
4	2011-04-27	09:00:00	9	2			10	3.3
4	2011-04-28	09:00:00	9	-2			11.1	0.6
4	2011-04-29	09:00:00	13	3			13.3	3.9
4	2011-04-30	09:00:00	9	1			9.4	3.3
5	2011-05-01	09:00:00	3	-7			5.6	-5.6
5	2011-05-02	09:00:00	4	-6			5.6	-6.1
5	2011-05-03	09:00:00	8	-3			8.3	-3.9
5	2011-05-04	09:00:00	11	-4			10.6	-2.8
5	2011-05-05	09:00:00	11	3			12.8	5.6
5	2011-05-06	09:00:00	13	3			13.9	2.8
5	2011-05-07	09:00:00	16	5			15.6	7.2
5	2011-05-08	09:00:00	13	8			13.3	10
5	2011-05-09	09:00:00	19	13			17.8	14.4
5	2011-05-10	09:00:00	21	11			20.6	14.4
5	2011-05-11	09:00:00	14	6			12.8	10.6
5	2011-05-12	09:00:00	7	3			10	8.9
5	2011-05-13	09:00:00	6	1			6.7	3.3
5	2011-05-14	09:00:00	6	1			6.7	3.3
5	2011-05-15	09:00:00	10	-1			10	2.2
5	2011-05-16	09:00:00	11	-3			11.1	0
5	2011-05-17	09:00:00	14	1			15	2.8
5	2011-05-18	09:00:00	15	1			15	3.3
5	2011-05-19	09:00:00	15	8			15	10.6
5	2011-05-20	09:00:00	15	11			15.6	13.9
5	2011-05-21	09:00:00	14	11			16.1	12.2
5	2011-05-22	09:00:00	13	9			13.9	12.8
5	2011-05-23	09:00:00	16	11			18.3	14.4
5	2011-05-24	09:00:00	13	8			14.4	12.8
5	2011-05-25	09:00:00	12	3			11.1	8.3
5	2011-05-26	09:00:00	12	1			12.8	5
5	2011-05-27	09:00:00	10	6			10.6	8.9
5	2011-05-28	09:00:00	14	8			13.3	12.8
5	2011-05-29	09:00:00	14	7			13.9	11.1
5	2011-05-30	09:00:00	22	16			24.4	20
5	2011-05-31	09:00:00	13	4			15	7.8
6	2011-06-01	09:00:00	16	4			16.7	8.3
6	2011-06-02	09:00:00	22	14			22.8	18.9
6	2011-06-03	09:00:00	25	13			25.6	16.1
6	2011-06-04	09:00:00	21	7			23.3	8.9
6	2011-06-05	09:00:00	22	11			23.9	11.1
6	2011-06-06	09:00:00	27	17			28.9	20
6	2011-06-07	09:00:00	28	14			29.4	16.1
6	2011-06-08	09:00:00	17	8			21.1	12.8
6	2011-06-09	09:00:00	12	4			14.4	6.7
6	2011-06-10	09:00:00	14	7			13.9	11.7
6	2011-06-11	09:00:00	13	8			16.1	10.6
6	2011-06-12	09:00:00	14	8			16.1	12.8
6	2011-06-13	09:00:00	17	12			15.6	13.9
6	2011-06-14	09:00:00	17	12			16.7	15
6	2011-06-15	09:00:00	18	10			18.9	13.3
6	2011-06-16	09:00:00	21	10			21.7	13.9
6	2011-06-17	09:00:00	20	14			21.7	17.8
6	2011-06-18	09:00:00	17	9			17.2	12.2
6	2011-06-19	09:00:00	21	13			20.6	17.8
6	2011-06-20	09:00:00	18	12			20.6	17.8
6	2011-06-21	09:00:00	18	13			18.3	16.7
6	2011-06-22	09:00:00	15	11			15	13.9
6	2011-06-23	09:00:00	16	9			16.7	12.2
6	2011-06-24	09:00:00	18	11			20	13.9
6	2011-06-25	09:00:00	18	11			18.9	14.4
6	2011-06-26	09:00:00	18	14			18.9	18.3
6	2011-06-27	09:00:00	19	9			19.4	13.3
6	2011-06-28	09:00:00	16	11			20	14.4
6	2011-06-29	09:00:00	23	14			23.3	17.8
6	2011-06-30	09:00:00	27	19			27.2	21.7
7	2011-07-01	09:00:00	25	18	65.1455		27.8	22.2	71.6111
7	2011-07-02	09:00:00	25	14	50.464		23.9	17.8	68.7101
7	2011-07-03	09:00:00	25	14	50.464		22.2	16.7	71.0367
7	2011-07-04	09:00:00	25	16	57.3933		23.3	18.9	76.3257
7	2011-07-05	09:00:00	25	14	50.464		23.3	20.6	84.8139
7	2011-07-06	09:00:00	25	12	44.2818		23.3	16.1	63.9635
7	2011-07-07	09:00:00	25	13	47.284		25.6	16.7	57.9048
7	2011-07-08	09:00:00	25	17	61.1616		27.2	19.4	62.4309
7	2011-07-09	09:00:00	25	17	61.1616		26.7	19.4	64.2925
7	2011-07-10	09:00:00	25	19	69.3555		28.3	21.1	65.0301
7	2011-07-11	09:00:00	25	15	53.8306		25.6	17.2	59.7689
7	2011-07-12	09:00:00	25	13	47.284		18.3	16.7	90.3962
7	2011-07-13	09:00:00	25	11	41.4488		20.6	15	70.285
7	2011-07-14	09:00:00	25	16	57.3933		20.6	20	96.3617
7	2011-07-15	09:00:00	25	21	78.4976		26.7	23.3	81.6504
7	2011-07-16	09:00:00	25	20	73.8025		28.3	23.9	77.0886
7	2011-07-17	09:00:00	25	22	83.4526		29.4	23.9	72.3283
7	2011-07-18	09:00:00	25	21	78.4976		29.4	22.8	67.6817
7	2011-07-19	09:00:00	25	21	78.4976		30	22.8	65.3831
7	2011-07-20	09:00:00	25	18	65.1455		28.9	20.6	60.9018
7	2011-07-21	09:00:00	25	12	44.2818		23.9	15.6	59.7523
7	2011-07-22	09:00:00	25	18	65.1455		26.1	22.2	79.1345
7	2011-07-23	09:00:00	25	15	53.8306		24.4	21.1	81.8644
7	2011-07-24	09:00:00	25	12	44.2818		21.1	17.2	78.4247
7	2011-07-25	09:00:00	25	17	61.1616		24.4	21.1	81.8644
7	2011-07-26	09:00:00	25	14	50.464		25	21.1	78.9813
7	2011-07-27	09:00:00	25	19	69.3555		24.4	22.2	87.5596
7	2011-07-28	09:00:00	25	16	57.3933		24.4	21.7	84.9292
7	2011-07-29	09:00:00	25	17	61.1616		25.6	20	71.2147
7	2011-07-30	09:00:00	25	19	69.3555		24.4	21.7	84.9292
7	2011-07-31	09:00:00	25	19	69.3555		27.2	23.9	82.2049
8	2011-08-01	09:00:00	25	21	78.4976		30	23.3	67.3912
8	2011-08-02	09:00:00	25	19	69.3555		27.2	20.6	67.2457
8	2011-08-03	09:00:00	25	11	41.4488		22.8	13.9	57.2271
8	2011-08-04	09:00:00	25	14	50.464		23.9	16.7	64.0938
8	2011-08-05	09:00:00	25	17	61.1616		23.3	21.1	87.4629
8	2011-08-06	09:00:00	25	14	50.464		23.9	21.1	84.3576
8	2011-08-07	09:00:00	25	12	44.2818		21.1	18.3	84.0507
8	2011-08-08	09:00:00	25	15	53.8306		22.8	18.9	78.6698
8	2011-08-09	09:00:00	25	11	41.4488		20.6	14.4	67.6176
8	2011-08-10	09:00:00	25	11	41.4488		20.6	13.3	62.958
8	2011-08-11	09:00:00	25	12	44.2818		22.2	14.4	61.3048
8	2011-08-12	09:00:00	25	12	44.2818		21.1	17.2	78.4247
8	2011-08-13	09:00:00	25	12	44.2818		19.4	15.6	78.6778
8	2011-08-14	09:00:00	25	13	47.284		22.8	17.2	70.6991
8	2011-08-15	09:00:00	25	14	50.464		22.8	17.8	73.4273
8	2011-08-16	09:00:00	25	13	47.284		21.1	17.2	78.4247
8	2011-08-17	09:00:00	25	11	41.4488		22.2	13.3	57.0801
8	2011-08-18	09:00:00	25	13	47.284		22.8	18.3	75.7709
8	2011-08-19	09:00:00	25	10	38.7768		21.7	17.2	75.5946
8	2011-08-20	09:00:00	25	8	33.8844		16.1	12.2	77.6799
8	2011-08-21	09:00:00	25	11	41.4488		21.1	15.6	70.8321
8	2011-08-22	09:00:00	25	14	50.464		22.8	18.9	78.6698
8	2011-08-23	09:00:00	25	17	61.1616		25.6	20.6	73.9036
8	2011-08-24	09:00:00	25	10	38.7768		23.9	15	57.495
8	2011-08-25	09:00:00	25	10	38.7768		21.1	12.2	56.809
8	2011-08-26	09:00:00	25	15	53.8306		26.1	18.3	62.1869
8	2011-08-27	09:00:00	25	9	36.2579		20	12.8	63.2358
8	2011-08-28	09:00:00	25	9	36.2579		15.6	14.4	92.5705
8	2011-08-29	09:00:00	25	11	41.4488		20.6	15.6	73.0445
8	2011-08-30	09:00:00	25	13	47.284		19.4	17.2	87.1114
8	2011-08-31	09:00:00	25	17	61.1616		21.7	21.1	96.3913
9	2011-09-01	09:00:00	25	18	65.1455		26.1	22.8	82.0722
9	2011-09-02	09:00:00	25	12	44.2818		19.4	17.8	90.4728
9	2011-09-03	09:00:00	25	12	44.2818		21.7	17.2	75.5946
9	2011-09-04	09:00:00	25	6	29.5453		17.2	10	62.6031
9	2011-09-05	09:00:00	25	6	29.5453		16.1	9.4	64.486
9	2011-09-06	09:00:00	25	7	31.6492		16.7	10	64.6184
9	2011-09-07	09:00:00	25	8	33.8844		18.3	11.1	62.8533
9	2011-09-08	09:00:00	25	11	41.4488		18.9	14.4	75.1374
9	2011-09-09	09:00:00	25	12	44.2818		22.2	15	63.7231
9	2011-09-10	09:00:00	25	11	41.4488		21.1	13.9	63.4805
9	2011-09-11	09:00:00	25	12	44.2818		23.3	15	59.6114
9	2011-09-12	09:00:00	25	11	41.4488		22.8	12.2	51.2128
9	2011-09-13	09:00:00	25	4	25.7046		15.6	5	49.2739
9	2011-09-14	09:00:00	25	-4	14.3875		7.8	-2.2	49.2108
9	2011-09-15	09:00:00	25	-3	15.5027		8.9	-0.6	51.3637
9	2011-09-16	09:00:00	25	1	20.7701		7.8	3.9	76.3607
9	2011-09-17	09:00:00	25	4	25.7046		11.1	8.3	82.8804
9	2011-09-18	09:00:00	25	8	33.8844		13.3	12.2	93.0515
9	2011-09-19	09:00:00	25	6	29.5453		16.1	8.9	62.3505
9	2011-09-20	09:00:00	25	6	29.5453		15	7.8	62.0958
9	2011-09-21	09:00:00	25	8	33.8844		12.2	7.2	71.5103
9	2011-09-22	09:00:00	25	5	27.5659		10	5	71.0885
9	2011-09-23	09:00:00	25	3	23.9555		10	3.9	65.8248
9	2011-09-24	09:00:00	25	5	27.5659		11.7	4.4	60.8905
9	2011-09-25	09:00:00	25	6	29.5453		12.8	5.6	61.5795
9	2011-09-26	09:00:00	25	9	36.2579		14.4	8.9	69.5418
9	2011-09-27	09:00:00	25	10	38.7768		16.7	10	64.6184
9	2011-09-28	09:00:00	25	9	36.2579		17.2	10	62.6031
9	2011-09-29	09:00:00	25	4	25.7046		16.1	3.3	42.3624
9	2011-09-30	09:00:00	25	4	25.7046		11.1	5	66.066
10	2011-10-01	09:00:00	10	1			11.1	1.7
10	2011-10-02	09:00:00	14	3			16.1	3.9
10	2011-10-03	09:00:00	16	4			16.7	5
10	2011-10-04	09:00:00	18	6			17.8	6.7
10	2011-10-05	09:00:00	18	8			19.4	7.8
10	2011-10-06	09:00:00	18	6			19.4	6.1
10	2011-10-07	09:00:00	20	11			21.7	11.1
10	2011-10-08	09:00:00	17	16			18.9	16.1
10	2011-10-09	09:00:00	15	14			17.8	15
10	2011-10-10	09:00:00	14	11			13.9	11.7
10	2011-10-11	09:00:00	S	S			15.6	11.1
10	2011-10-12	09:00:00	14	12			15.6	13.3
10	2011-10-13	09:00:00	11	8			11.1	6.1
10	2011-10-14	09:00:00	8	4			10	3.9
10	2011-10-15	09:00:00	7	4			8.9	3.3
10	2011-10-16	09:00:00	7	4			8.9	3.9
10	2011-10-17	09:00:00	6	-1			7.8	0.6
10	2011-10-18	09:00:00	4	-1			6.7	0.6
10	2011-10-19	09:00:00	0	-4			1.7	-5.6
10	2011-10-20	09:00:00	1	-1			2.8	-1.1
10	2011-10-21	09:00:00	4	-1			5.6	-0.6
10	2011-10-22	09:00:00	5	3			7.8	3.9
10	2011-10-23	09:00:00	11	7			11.1	7.2
10	2011-10-24	09:00:00	6	3			11.7	3.3
10	2011-10-25	09:00:00	8	2			8.3	2.8
10	2011-10-26	09:00:00	5	3			5.6	2.8
10	2011-10-27	09:00:00	2	-1			2.2	-2.2
10	2011-10-28	09:00:00	3	-1			5	-2.2
10	2011-10-29	09:00:00	2	-6			5	-5
10	2011-10-30	09:00:00	4	-1			5	-1.1
10	2011-10-31	09:00:00	1	-2			3.9	-0.6
11	2011-11-01	09:00:00	9	2			8.9	1.1
11	2011-11-02	09:00:00	4	-3			5	0
11	2011-11-03	09:00:00	-1	-3			0	-4.4
11	2011-11-04	09:00:00	2	-3			2.8	-2.8
11	2011-11-05	09:00:00	7	2			7.8	1.7
11	2011-11-06	09:00:00	4	0			4.4	-1.7
11	2011-11-07	09:00:00	0	-6			1.7	-6.1
11	2011-11-08	09:00:00	0	-3			3.9	-3.9
11	2011-11-09	09:00:00	-1	-3			1.7	-5
11	2011-11-10	09:00:00	-4	-6			-2.8	-7.8
11	2011-11-11	09:00:00	0	-6			1.7	-5.6
11	2011-11-12	09:00:00	3	-6			4.4	-5
11	2011-11-13	09:00:00	4	-2			5.6	-3.3
11	2011-11-14	09:00:00	2	-2			3.9	-3.3
11	2011-11-15	09:00:00	1	-2			2.8	-2.8
11	2011-11-16	09:00:00	-4	-8			-3.9	-10
11	2011-11-17	09:00:00	-9	-12			-6.1	-11.1
11	2011-11-18	09:00:00	0	-4			3.3	-5
11	2011-11-19	09:00:00	-6	-10			-3.9	-10
11	2011-11-20	09:00:00	-16	-17			-11.1	-15
11	2011-11-21	09:00:00	-4	-7			-4.4	-7.8
11	2011-11-22	09:00:00	2	1			2.8	1.1
11	2011-11-23	09:00:00	-3	-3			-2.8	-3.3
11	2011-11-24	09:00:00	3	-2			7.2	-1.1
11	2011-11-25	09:00:00	0	-2			3.9	0
11	2011-11-26	09:00:00	2	-1			2.8	-1.1
11	2011-11-27	09:00:00	-6	-8			-4.4	-9.4
11	2011-11-28	09:00:00	-3	-9			-1.1	-11.1
11	2011-11-29	09:00:00	-6	-7			-3.9	-7.2
11	2011-11-30	09:00:00	-2	-9			-0.6	-9.4
12	2011-12-01	09:00:00	-8	-11			-3.3	-7.2
12	2011-12-02	09:00:00	-7	-10			-7.2	-11.1
12	2011-12-03	09:00:00	-2	-4			-0.6	-5
12	2011-12-04	09:00:00	-7	-11			-6.1	-10
12	2011-12-05	09:00:00	-10	-12			-8.3	-12.2
12	2011-12-06	09:00:00	-16	-17			-15	-16.7
12	2011-12-07	09:00:00	-5	-8			-2.8	-7.8
12	2011-12-08	09:00:00	-8	-12			-6.1	-10
12	2011-12-09	09:00:00	-16	-19			-15	-19.4
12	2011-12-10	09:00:00	-10	-12			-8.3	-11.1
12	2011-12-11	09:00:00	-3	-6			-2.8	-3.9
12	2011-12-12	09:00:00	2	2			3.3	1.7
12	2011-12-13	09:00:00	-3	-4			-2.8	-4.4
12	2011-12-14	09:00:00	2	2			3.3	2.8
12	2011-12-15	09:00:00	-2	-7			-1.7	-7.2
12	2011-12-16	09:00:00	-8	-9			-6.1	-8.3
12	2011-12-17	09:00:00	-7	-8			-6.1	-7.8
12	2011-12-18	09:00:00	-2	-5			0	-4.4
12	2011-12-19	09:00:00	-1	-4			0	-3.9
12	2011-12-20	09:00:00	-10	-10			-10.6	-12.8
[truncated: 1,744 more rows]
